# Supplementary material for: Diastereoselective synthesis of benzazocines by Zn(OTf)2-catalyzed (4+4) cyclocondensation of multisubstituted donor–acceptor cyclopropanes with anthranils
Source: Royal Society of Chemistry journal article supplement (doi:10.1039/d4cc06690a), 2025-01-01
Supplement: d4cc06690a1.pdf [file d4cc06690a1.pdf]

### Supplementary Information

## Diastereoselective synthesis of benzazocines by Zn(OTf)<sub>2</sub>-catalyzed (4+4) cyclocondensation of multisubstituted donor-acceptor cyclopropanes with anthranils

Xuelian Huang, Gaosheng Yang \* and Zhuo Chai \*

MOE Key Laboratory of Functionalized Molecular Solids, Anhui Key Laboratory of Molecule-Based Materials (State Key Laboratory Cultivation Base), College of Chemistry and Materials Science, Anhui Normal University, Wuhu, Anhui 241002, China

\*Corresponding authors

*E-mail:* gshyang@ahnu.edu.cn, ch aizhuo@ahnu.edu.cn

## Contents

|                                                                                                                                    |      |
|------------------------------------------------------------------------------------------------------------------------------------|------|
| 1. General information.....                                                                                                        | S2   |
| 2. Experimental procedures .....                                                                                                   | S2   |
| 2.1 General procedures for the preparation of cyclopropanes <b>1</b> .....                                                         | S2   |
| 2.2 Optimization of the (4+4) cyclocondensation reaction conditions .....                                                          | S3   |
| 2.3 General procedure for the synthesis of products <b>3</b> .....                                                                 | S4   |
| 2.4 Procedure for the preparation of <b>3aa</b> on gram-scale.....                                                                 | S4   |
| 2.5 Procedure for the reduction of <b>3aa</b> .....                                                                                | S4   |
| 2.6 Procedure for the reductive N–O bond cleavage of <b>4</b> .....                                                                | S5   |
| 2.7 Procedure for the decarboxylation of <b>4</b> .....                                                                            | S5   |
| 2.8 Procedure for the reductive N–O bond cleavage of <b>7</b> .....                                                                | S5   |
| 2.9 Procedure for the reduction of <b>7</b> .....                                                                                  | S6   |
| 2.10 Procedure for the cycloetherification of <b>10</b> .....                                                                      | S6   |
| 2.11 Procedure for the reductive N–O bond cleavage and acetylation of <b>11</b> .....                                              | S6   |
| 3. X-Ray crystal structure and details of compounds <b>3aa</b> , <b>6</b> , <b>12</b> , <b>13</b> , <b>1u</b> and <b>3ua</b> ..... | S7   |
| 4. References.....                                                                                                                 | S10  |
| 5. Characterization data of compounds .....                                                                                        | S11  |
| 5.1 Characterization data of cyclopropanes <b>1</b> .....                                                                          | S11  |
| 5.2 Characterization data of products <b>3</b> .....                                                                               | S12  |
| 5.3 Characterization data of transformation products .....                                                                         | S20  |
| 6. Copies of NMR spectra for compounds .....                                                                                       | S23  |
| 6.1 Copies of NMR spectra for compounds <b>15u</b> , <b>16u</b> , <b>1u</b> and <b>1u'</b> .....                                   | S23  |
| 6.2 Copies of NMR spectra for products <b>3</b> .....                                                                              | S31  |
| 6.3 Copies of NMR spectra for transformation products .....                                                                        | S104 |
| 7. Studies on the conversion of compound <b>8</b> to compound <b>9</b> .....                                                       | S128 |
| 8. Determination of the structure of <b>3ua'</b> by transesterification and by comparison of HPLC.....                             | S129 |

## 1. General information

All reactions between the D–A cyclopropanes **1** with anthranils **2** were carried out with flame-dried Schlenk-type glassware using a Schlenk line. The cyclopropanes **1** were prepared according to the related literature.<sup>1</sup> Anthranils **2** are known products and prepared according to the related literature.<sup>2</sup> All other reagents were purchased from commercial suppliers and purified by standard techniques, and the purified solvents were stored over activated molecular sieves 4Å. Flash column chromatography was performed using silica gel (200–400 mesh). Thin-layer chromatography (TLC) was performed on silica gel plates (HSGF 254). Visualization of the developed chromatogram was performed by UV light, staining with iodine (dispersed in silica gel), or by KMnO<sub>4</sub> stain. <sup>1</sup>H NMR (500 MHz), <sup>13</sup>C NMR (125 MHz) and <sup>19</sup>F NMR (470) spectra were recorded in CDCl<sub>3</sub>. Data for <sup>13</sup>C{<sup>1</sup>H} NMR were recorded with broad-band proton decoupling technique. The NMR data of compound **12** was acquired at –50 °C. Structural assignments for compounds **11** and **13** were made with additional information from gCOSY, gHSQC experiments. All chemical shifts ( $\delta$ ) are given in ppm relative to TMS ( $\delta = 0$  ppm) as internal standard. Data are reported as follows: chemical shift, multiplicity, coupling constants and integration. Melting points were uncorrected. High resolution mass spectral (HRMS) data were obtained with an ionization mode of APCI/ESI and a TOF analyzer.

## 2. Experimental procedures

### 2.1 General procedures for the preparation of cyclopropanes **1**<sup>1</sup>

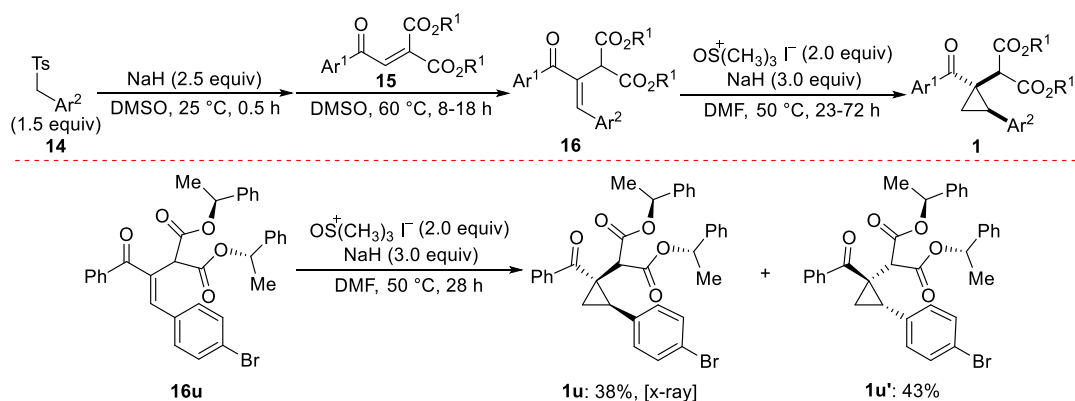

Aryl *p*-tolyl sulfones **14**<sup>3a</sup>, 2-arylmethylenemalonates **15**<sup>3b</sup> were prepared according to related literatures.

Under an argon atmosphere, to an oven-dried Schlenk tube containing a magnetic stirring bar was added **14** (4.5 mmol, 1.5 equiv), 60% NaH (0.3 g, 7.5 mmol, 2.5 equiv), and DMSO (20 mL). The mixture was stirred at r.t about 30 mins, then **15** (3 mmol, 1 equiv) was added. The resulting mixture was stirred at 60 °C in metal sand bath until the disappearance of **15** as monitored by TLC. Then the reaction mixture was cooled down to room temperature and quenched with saturated NH<sub>4</sub>Cl (30 mL). The resulting mixture was extracted with ethyl acetate (100 mL × 3). The organic layer was washed with brine (20 mL × 3), and dried over anhydrous Na<sub>2</sub>SO<sub>4</sub>. The solvent was evaporated and the residue was purified by chromatography on silica gel

to afford the product **16**.

Under an argon atmosphere, to an oven-dried Schlenk tube containing a magnetic stirring bar was added **16** (2 mmol, 1 equiv), trimethylsulfoxonium iodide (0.88 g, 4 mmol, 2 equiv), 60% sodium hydride (0.24 g, 6 mmol, 3 equiv), DMF (20 mL). The above mixture was stirred at 50 °C in metal sand bath until the disappearance of **16** as monitored by TLC. The reaction mixture was cooled down to room temperature and quenched with saturated NH<sub>4</sub>Cl (30 mL). The resulting mixture was extracted with ethyl acetate (100 mL × 3). The organic layer was washed with brine (20 mL × 3), and dried over anhydrous Na<sub>2</sub>SO<sub>4</sub>. The solvent was evaporated and the residue was purified by chromatography on silica gel to afford the cyclopropanes **1**. For the preparation of enantioenriched products **1u** and **1u'**, commercial enantioenriched (*S*)-1-phenylethanol (98% ee) was used.

## 2.2 Optimization of the (4+4) cyclocondensation reaction conditions

**Table S1** Optimization of reaction conditions for the (4+4) annulation of the D-A cyclopropane **1a** with anthranils<sup>a</sup>

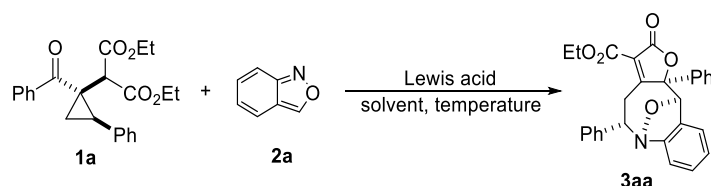

| entry | <b>2a</b> (equiv) | LA (x mol %)                           | solvent | temperature (°C) | time (days) | yield <sup>b</sup> (%) |
|-------|-------------------|----------------------------------------|---------|------------------|-------------|------------------------|
| 1     | 2.0               | no                                     | 1,2-DCE | 25               | 7           | NR                     |
| 2     | 2.0               | no                                     | 1,2-DCE | 60               | 7           | NR                     |
| 3     | 2.0               | no                                     | 1,2-DCE | 90               | 7           | complicated            |
| 4     | 2.0               | Sc(OTf) <sub>3</sub> (5)               | 1,2-DCE | 25               | 7           | NR                     |
| 5     | 2.0               | Sc(OTf) <sub>3</sub> (5)               | 1,2-DCE | 40               | 7           | NR                     |
| 6     | 2.0               | Sc(OTf) <sub>3</sub> (5)               | 1,2-DCE | 60               | 7           | 13                     |
| 7     | 2.0               | Y(OTf) <sub>3</sub> (5)                | 1,2-DCE | 60               | 7           | 15                     |
| 8     | 2.0               | La(OTf) <sub>3</sub> (5)               | 1,2-DCE | 60               | 7           | 24                     |
| 9     | 2.0               | Sm(OTf) <sub>3</sub> (5)               | 1,2-DCE | 60               | 7           | trace                  |
| 10    | 2.0               | Er(OTf) <sub>3</sub> (5)               | 1,2-DCE | 60               | 7           | 15                     |
| 11    | 2.0               | Yb(OTf) <sub>3</sub> (5)               | 1,2-DCE | 60               | 7           | 11                     |
| 12    | 2.0               | Mg(OTf) <sub>2</sub> (5)               | 1,2-DCE | 60               | 7           | complicated            |
| 13    | 2.0               | Al(OTf) <sub>3</sub> (5)               | 1,2-DCE | 60               | 7           | complicated            |
| 14    | 2.0               | Fe(OTf) <sub>3</sub> (5)               | 1,2-DCE | 60               | 7           | complicated            |
| 15    | 2.0               | Cu(OTf) <sub>2</sub> (5)               | 1,2-DCE | 60               | 7           | trace                  |
| 16    | 2.0               | Zn(OTf) <sub>2</sub> (5)               | 1,2-DCE | 60               | 7           | 28                     |
| 17    | 2.0               | Sn(OTf) <sub>2</sub> (5)               | 1,2-DCE | 60               | 7           | 16                     |
| 18    | 2.0               | BF <sub>3</sub> ·Et <sub>2</sub> O (5) | 1,2-DCE | 60               | 7           | NR                     |
| 19    | 2.0               | AlCl <sub>3</sub> (5)                  | 1,2-DCE | 60               | 7           | complicated            |
| 20    | 2.0               | FeCl <sub>3</sub> (5)                  | 1,2-DCE | 60               | 7           | complicated            |
| 21    | 2.0               | MgBr <sub>2</sub> (5)                  | 1,2-DCE | 60               | 7           | complicated            |
| 22    | 2.0               | MgI <sub>2</sub> (5)                   | 1,2-DCE | 60               | 7           | complicated            |
| 23    | 2.0               | CaI <sub>2</sub> (5)                   | 1,2-DCE | 60               | 7           | trace                  |
| 24    | 2.0               | La(OTf) <sub>3</sub> (5)               | 1,2-DCE | 80               | 4           | 37                     |
| 25    | 2.0               | La(OTf) <sub>3</sub> (5)               | 1,2-DCE | 90               | 2.5         | 53                     |
| 26    | 2.0               | La(OTf) <sub>3</sub> (5)               | 1,2-DCE | 100              | 2           | 49                     |

|                 |     |                           |             |        |     |             |
|-----------------|-----|---------------------------|-------------|--------|-----|-------------|
| 27              | 2.0 | Zn(OTf) <sub>2</sub> (5)  | 1,2-DCE     | 80     | 4   | 58          |
| 28              | 2.0 | Zn(OTf) <sub>2</sub> (5)  | 1,2-DCE     | 90     | 2.5 | 65          |
| 29              | 2.0 | Zn(OTf) <sub>2</sub> (5)  | 1,2-DCE     | 100    | 2   | 57          |
| 30              | 2.0 | Zn(OTf) <sub>2</sub> (10) | 1,2-DCE     | 90     | 2.5 | 55          |
| 31              | 2.0 | Zn(OTf) <sub>2</sub> (2)  | 1,2-DCE     | 90     | 2.5 | 80          |
| 32 <sup>c</sup> | 2.0 | Zn(OTf) <sub>2</sub> (2)  | 1,2-DCE     | 90     | 2.5 | 80 (0.95 g) |
| 33              | 2.0 | Zn(OTf) <sub>2</sub> (1)  | 1,2-DCE     | 90     | 2.5 | 74          |
| 34              | 2.0 | Zn(OTf) <sub>2</sub> (2)  | DCM         | reflux | 2.5 | NR          |
| 35              | 2.0 | Zn(OTf) <sub>2</sub> (2)  | DMSO        | 90     | 2.5 | NR          |
| 36              | 2.0 | Zn(OTf) <sub>2</sub> (2)  | ethyl ether | reflux | 2.5 | NR          |
| 37              | 2.0 | Zn(OTf) <sub>2</sub> (2)  | dioxane     | 90     | 2.5 | 62          |
| 38              | 2.0 | Zn(OTf) <sub>2</sub> (2)  | THF         | reflux | 2.5 | 45          |
| 39              | 2.0 | Zn(OTf) <sub>2</sub> (2)  | toluene     | 90     | 2.5 | 65          |
| 40              | 3.0 | Zn(OTf) <sub>2</sub> (2)  | 1,2-DCE     | 90     | 2.5 | 87          |
| 41              | 4.0 | Zn(OTf) <sub>2</sub> (2)  | 1,2-DCE     | 90     | 2.5 | 96          |
| 42 <sup>d</sup> | 4.0 | Zn(OTf) <sub>2</sub> (2)  | 1,2-DCE     | 90     | 2.5 | 98 (1.34 g) |
| 43              | 4.0 | La(OTf) <sub>3</sub> (2)  | 1,2-DCE     | 90     | 2.5 | 61          |
| 44              | 4.0 | Sc(OTf) <sub>3</sub> (2)  | 1,2-DCE     | 90     | 2.5 | 25          |
| 45              | 4.0 | Sn(OTf) <sub>2</sub> (2)  | 1,2-DCE     | 90     | 2.5 | 10          |

<sup>a</sup>The reaction was conducted with 0.1 mmol of **1a** in 1 mL of solvent. <sup>b</sup>Isolated yields. <sup>c</sup>Run with 2.63 mmol of **1a**. <sup>d</sup>Run with 3 mmol of **1a**.

### 2.3 General procedure for the synthesis of products **3**

Under an argon atmosphere, to an oven-dried Schlenk tube containing a magnetic stirring bar was added cyclopropanes **1** (0.2 mmol, 1 equiv), anthranils **2** (0.8 mmol, 4 equiv), 1,2-DCE (2 mL) and Zn(OTf)<sub>2</sub> (1.45 mg, 0.004 mmol, 2 mol%). The reaction mixture was stirred at 90 °C in metal sand bath for 2.5 days. After the reaction was finished, the organic solvent was removed under reduced pressure. Then the crude mixture was purified by column chromatography on silica gel (eluting with petroleum ether/ethyl acetate (v/v): 15/1 – 5/1) to furnish the desired products **3**.

### 2.4 Procedure for the preparation of **3aa** on gram-scale

Under an argon atmosphere, to an oven-dried Schlenk tube containing a magnetic stirring bar was added cyclopropane **1a** (1.14 g, 3 mmol, 1 equiv), anthranil **2a** (1.428 g, 12 mmol, 4 equiv), 1,2-DCE (40 mL) and Zn(OTf)<sub>2</sub> (21.8 mg, 0.06 mmol, 2 mol%). The reaction mixture was stirred at 90 °C in metal sand bath for 2.5 days. After the reaction was finished, the organic solvent was removed under reduced pressure. Then the crude mixture was purified by column chromatography (eluting with petroleum ether/ethyl acetate (v/v): 15/1 – 5/1) to furnish the desired products **3aa** in 98% yield (1.34 g, 2.95 mmol).

### 2.5 Procedure for the reduction of **3aa**

Under an argon atmosphere, the cycloadduct **3aa** (415 mg, 0.91 mmol) was dissolved in THF (20 mL), and cooled down to 0 °C, and then LiAlH<sub>4</sub> (104 mg, 2.73 mmol, 3 equiv) was added into the solution. The reaction mixture was stirred at room temperature. When the cycloadduct **3aa** disappeared (monitored by TLC),



the reaction mixture was quenched with H<sub>2</sub>O and NaOH, and then passed over a plug of celite with 50 mL of MeOH. The filtrate was removed under reduced pressure and the residue was purified by silica gel column chromatography (eluting with petroleum ether/ethyl acetate (v/v): 6/1) to give the desired product **4** in 80% yield (332.2 mg, 0.73 mmol).

## 2.6 Procedure for the reductive N–O bond cleavage of **4**<sup>4</sup>

The compound **4** (45.6 mg, 0.1 mmol, 1 equiv) and dichloromethane (1 mL) were added into a reaction flask with stirring bar. Zinc dust (130 mg, 2.00 mmol, 20 equiv) and acetic acid (1 mL) were sequentially added in to the flask. Then the reaction mixture was stirred at 25 °C. When **4** disappeared (monitored by TLC), the reaction mixture was passed over a plug of celite with 15 mL of ethyl acetate. The filtrate was removed under reduced pressure and the residue was purified by silica gel column chromatography (eluting with petroleum ether/ethyl acetate (v/v): 5/1) to give the product **5** in 25% yield (11.5 mg, 0.025 mmol) and product **6** in 50% yield (21.9 mg, 0.05 mmol).

The compound **4** (45.6 mg, 0.1 mmol, 1 equiv), MeOH (1 mL) and H<sub>2</sub>O (1 mL) were added into a reaction flask with stirring bar. Zinc dust (130 mg, 2.00 mmol, 20 equiv) and acetic acid (1 mL) were sequentially added into the flask. Then the reaction mixture was stirred at room temperature. When **4** disappeared (monitored by TLC), the reaction mixture was passed over a plug of celite with 15 mL of ethyl acetate. The filtrate was removed under reduced pressure and the residue was purified by silica gel column chromatography (eluting with petroleum ether/ethyl acetate (v/v): 5/1) to give the product **5** in 80% yield (36.6 mg, 0.08 mmol) and product **6** in 15% yield (6.7 mg, 0.015 mmol).

## 2.7 Procedure for the decarboxylation of **4**

A mixture of compound **4** (332 mg, 0.73 mmol, 1 equiv) and NaCl (342 mg, 5.84 mmol, 8 equiv) in DMSO (5 mL) and water (0.5 mL) was heated at 100 °C under an argon atmosphere for 24 hours. After completion of the reaction, the mixture was cooled down to room temperature, diluted with water (30 mL) and extracted with CH<sub>2</sub>Cl<sub>2</sub> (3 × 30 mL). The combined organic layers were washed with brine (30 mL), dried with anhydrous Na<sub>2</sub>SO<sub>4</sub>, filtered, and concentrated under reduced pressure, and the residue was purified by column chromatography (eluting with petroleum ether/ethyl acetate (v/v): 5/1) to afford the desired product **7** in 89% yield (251.5 mg, 0.66 mmol).

## 2.8 Procedure for the reductive N–O bond cleavage of **7**<sup>4</sup>

The compound **7** (38.3 mg, 0.1 mmol, 1 equiv) and dichloromethane (1 mL) were added into a reaction flask with stirring bar. Zinc dust (130 mg, 2.00 mmol, 20 equiv) and acetic acid (1 mL) were sequentially added in to the flask. Then the reaction mixture was stirred at room temperature. When **7** disappeared

(monitored by TLC, about 24 hours), the reaction mixture was passed over a plug of celite with 15 mL of ethyl acetate. The filtrate was removed under reduced pressure and the residue was purified by silica gel column chromatography (eluting with petroleum ether/ethyl acetate (v/v): 5/1) to give the product **8** in 35% yield (13.5 mg, 0.035 mmol) and product **9** in 50% yield (18.5 mg, 0.05 mmol).

The compound **7** (38.3 mg, 0.1 mmol, 1 equiv), MeOH (1 mL) and H<sub>2</sub>O (1 mL) were added into a reaction flask with stirring bar. Zinc dust (130 mg, 2.00 mmol, 20 equiv) and acetic acid (1 mL) were sequentially added in to the flask. Then the reaction mixture was stirred at room temperature. When **7** disappeared (monitored by TLC, about 3 hours), the reaction mixture was passed over a plug of celite with 15 mL of ethyl acetate. The filtrate was removed under reduced pressure and the residue was purified by silica gel column chromatography (eluting with petroleum ether/ethyl acetate (v/v): 5/1) to give the product **8** in 85% yield (32.7 mg, 0.085 mmol) and product **9** in 8% yield (3 mg, 0.008 mmol).

## 2.9 Procedure for the reduction of **7**

Under an argon atmosphere, the compound **7** (126.4 mg, 0.33 mmol, 1 equiv) was dissolved in THF (5 mL), and cooled at 0 °C, and then LiAlH<sub>4</sub> (50.2 mg, 1.32 mmol, 4 equiv) was added into the reaction mixture. The reaction mixture was stirred at room temperature. When the compound **7** disappeared (monitored by TLC), the reaction mixture was quenched with H<sub>2</sub>O and NaOH, and then passed over a plug of celite with 30 mL of MeOH. The filtrate was removed under reduced pressure and the residue was purified by silica gel column chromatography (eluting with petroleum ether/ethyl acetate (v/v): 2/1) to give the desired product **10** in 94% yield (120 mg, 0.31 mmol).

## 2.10 Procedure for the cycloetherification of **10**

Under an argon atmosphere, to an ice-cooled solution of diol **10** (120 mg, 0.31 mmol, 1 equiv) in THF (5 mL) was added NaH (24.8 mg 60% dispersion in mineral oil, 0.62 mmol, 2 equiv). The resultant suspension was stirred for 10 min before the addition of MsCl (70.7 mg, 0.62 mmol, 2 equiv). Then the reaction mixture was stirred at 25 °C for 12 h before being quenched by the addition of H<sub>2</sub>O. The residue was dissolved in 10 mL of CH<sub>2</sub>Cl<sub>2</sub> and 10 mL of H<sub>2</sub>O and the aqueous phase was extracted with CH<sub>2</sub>Cl<sub>2</sub> (3 × 10 mL). The combined organic layers were washed with brine solution (30 mL), dried with anhydrous Na<sub>2</sub>SO<sub>4</sub>, filtered, and concentrated under reduced pressure. The residue was purified by column chromatography (eluting with petroleum ether/ethyl acetate (v/v): 8/1) to afford the desired product **11** in 90% yield (103.3 mg, 0.28 mmol).

## 2.11 Procedure for the reductive N–O bond cleavage and acetylation of **11**

Under an argon atmosphere, the product **11** (103.3 mg, 0.28 mmol, 1 equiv) and dichloromethane (5 mL) were added into an oven-dried reaction flask with stirring bar. Zinc dust (364 mg, 5.60 mmol, 20 equiv) and

acetic acid (5 mL) were sequentially added in to the flask. Then the reaction mixture was stirred at room temperature. When **11** disappeared (monitored by TLC), the reaction mixture was passed over a plug of celite with 15 mL of ethyl acetate. The filtrate was removed under reduced pressure and the residue was purified by silica gel column chromatography (eluting with petroleum ether/ethyl acetate (v/v): 4/1) to give the product **12** in 86% yield (90 mg, 0.24 mmol).

The product **12** (18.6 mg, 0.05 mmol, 1 equiv) was dissolved in DCM (1 mL), then Et<sub>3</sub>N (10.2 mg, 0.1 mmol, 2 equiv) and Ac<sub>2</sub>O (10.1 mg, 0.1 mmol, 2 equiv) was added into the solution. The reaction mixture was stirred at room temperature. When **12** disappeared (monitored by TLC), the reaction mixture was extracted with ethyl acetate, the organic layer was washed with 5% aqueous solution of NaOH and water, and dried over anhydrous Na<sub>2</sub>SO<sub>4</sub>. The solvent was evaporated and the residue was purified by silica gel column chromatography (eluting with petroleum ether/ethyl acetate (v/v): 6/1) to give the desired product **13** in 76% yield (15.9 mg, 0.038 mmol).

### 3. X-Ray crystal structure and details of compounds **3aa**, **6**, **12**, **13**, **1u** and **3ua**

The single crystals of **3aa**, **6**, **12**, **13**, **1u** and **3ua** suitable for X-ray crystallographic analysis were obtained by recrystallization from a mixed solvent of dichloromethane and petroleum ether. The single crystal X-ray diffraction data for the five compounds were collected on a Bruker APEX-II CCD diffractometer with graphite monochromated Mo K $\alpha$  radiation ( $\lambda = 0.71073 \text{ \AA}$ ) for **3aa**, **6**, **12**, **13**, **1u** and **3ua**. Saint program and SADABS program carried out the data integration. The structure was solved by a direct method and refined on F2 using SHELXTL suite of program. All non-hydrogen atoms were anisotropically refined by full-matrix least squares methods. All hydrogen atoms were geometrically generated and isotropically refined using a riding model. The details of the X-ray data collection, structure solution and structure refinements are given in **Table S4**, **Table S5** and **Table S6**.

**Table S4** Crystallographic data and structural refinement details for compounds **3aa** and **6**.

| Compound              | <b>3aa</b>                                      | <b>6</b>                                        |
|-----------------------|-------------------------------------------------|-------------------------------------------------|
| Formula               | C <sub>28</sub> H <sub>23</sub> NO <sub>5</sub> | C <sub>28</sub> H <sub>25</sub> NO <sub>4</sub> |
| Formula weight        | 453.47                                          | 439.52                                          |
| Temperature/K         | 293                                             | 293                                             |
| Crystal system        | triclinic                                       | triclinic                                       |
| Space group           | P-1                                             | P-1                                             |
| <i>a</i> , Å          | 11.9433(10)                                     | 9.838(4)                                        |
| <i>b</i> , Å          | 12.3276(10)                                     | 11.101(4)                                       |
| <i>c</i> , Å          | 20.1320(17)                                     | 11.425(4)                                       |
| $\alpha$ , deg        | 75.060(1)                                       | 97.664(5)                                       |
| $\beta$ , deg         | 81.142(1)                                       | 97.936(5)                                       |
| $\gamma$ , deg        | 75.914(1)                                       | 110.262(4)                                      |
| Volume/Å <sup>3</sup> | 2764.6(4)                                       | 1137.1(7)                                       |

|                                                  |                                 |                                |
|--------------------------------------------------|---------------------------------|--------------------------------|
| Z                                                | 4                               | 2                              |
| $\mu/\text{mm}^{-1}$                             | 0.075                           | 0.086                          |
| $\theta$ range for data collection, deg          | 2.1 to 25.0                     | 1.8 to 27.5                    |
| Reflections collected                            | 27603                           | 9787                           |
| Unique reflections/ $R_{\text{int}}$             | 9696 / $R(\text{int}) = 0.1373$ | 4981 / $R(\text{int}) = 0.027$ |
| Goodness-of-fit on $F^2$                         | 1.030                           | 1.08                           |
| R, $R_w$ [ $I > 2\sigma(I)$ ]                    | 0.0722, 0.2479                  | 0.0552, 0.1543                 |
| Residual $\rho/(\text{e} \cdot \text{\AA}^{-3})$ | 0.38, -0.33                     | 0.28, -0.31                    |
| CCDC                                             | 2309776                         | 2309777                        |

**Table S5** Crystallographic data and structural refinement details for compounds **12** and **13**.

| Compound                                         | <b>12</b>                               | <b>13</b>                               |
|--------------------------------------------------|-----------------------------------------|-----------------------------------------|
| Formula                                          | $\text{C}_{25}\text{H}_{25}\text{NO}_2$ | $\text{C}_{27}\text{H}_{27}\text{NO}_3$ |
| Formula weight                                   | 371.46                                  | 413.49                                  |
| Temperature/K                                    | 293                                     | 273                                     |
| Crystal system                                   | orthorhombic                            | triclinic                               |
| Space group                                      | Pca21                                   | P-1                                     |
| $a$ , $\text{\AA}$                               | 11.3577(14)                             | 10.0943(6)                              |
| $b$ , $\text{\AA}$                               | 12.6655(16)                             | 12.4294(8)                              |
| $c$ , $\text{\AA}$                               | 27.035(3)                               | 18.1764(13)                             |
| $\alpha$ , deg                                   | 90                                      | 85.359(2)                               |
| $\beta$ , deg                                    | 90                                      | 80.756(2)                               |
| $\gamma$ , deg                                   | 90                                      | 85.323(2)                               |
| Volume/ $\text{\AA}^3$                           | 3889.0(8)                               | 2238.1(3)                               |
| Z                                                | 8                                       | 4                                       |
| $\mu/\text{mm}^{-1}$                             | 0.080                                   | 0.079                                   |
| $\theta$ range for data collection, deg          | 1.5 to 27.5                             | 2.6 to 25.0                             |
| Reflections collected                            | 32590                                   | 80513                                   |
| Unique reflections/ $R_{\text{int}}$             | 8633 / $R(\text{int}) = 0.036$          | 7849 / $R(\text{int}) = 0.160$          |
| Goodness-of-fit on $F^2$                         | 1.03                                    | 1.07                                    |
| R, $R_w$ [ $I > 2\sigma(I)$ ]                    | 0.0501, 0.1386                          | 0.0573, 0.1538                          |
| Residual $\rho/(\text{e} \cdot \text{\AA}^{-3})$ | 0.37, -0.21                             | 0.32, -0.34                             |
| CCDC                                             | 2309778                                 | 2309779                                 |

**Table S6** Crystallographic data and structural refinement details for compounds **1u** and **3ua**.

| Compound               | <b>1u</b>                                | <b>3ua</b>                                    |
|------------------------|------------------------------------------|-----------------------------------------------|
| Formula                | $\text{C}_{35}\text{H}_{31}\text{BrO}_5$ | $\text{C}_{34}\text{H}_{26}\text{BrNO}_5$     |
| Formula weight         | 611.51                                   | 608.47                                        |
| Temperature/K          | 273                                      | 273                                           |
| Crystal system         | trigonal                                 | orthorhombic                                  |
| Space group            | P3 <sub>1</sub> 21                       | P2 <sub>1</sub> 2 <sub>1</sub> 2 <sub>1</sub> |
| $a$ , $\text{\AA}$     | 11.5209(2)                               | 10.4122(6)                                    |
| $b$ , $\text{\AA}$     | 11.5209(2)                               | 13.8828(10)                                   |
| $c$ , $\text{\AA}$     | 40.4128(12)                              | 19.5704(13)                                   |
| $\alpha$ , deg         | 90                                       | 90                                            |
| $\beta$ , deg          | 90                                       | 90                                            |
| $\gamma$ , deg         | 120                                      | 90                                            |
| Volume/ $\text{\AA}^3$ | 4645.4(2)                                | 2828.9(3)                                     |

|                                                  |                                |                                 |
|--------------------------------------------------|--------------------------------|---------------------------------|
| Z                                                | 6                              | 4                               |
| $\mu/\text{mm}^{-1}$                             | 2.129                          | 1.497                           |
| $\theta$ range for data collection, deg          | 4.4 to 68.4                    | 2.5 to 25.0                     |
| Reflections collected                            | 104615                         | 79600                           |
| Unique reflections/ $R_{\text{int}}$             | 5495 / $R(\text{int}) = 0.094$ | 4978 / $R(\text{int}) = 0.0907$ |
| Goodness-of-fit on $F^2$                         | 1.08                           | 1.054                           |
| R, $R_w$ [ $I > 2\sigma(I)$ ]                    | 0.0550, 0.1437                 | 0.0369, 0.0759                  |
| Residual $\rho/(\text{e} \cdot \text{\AA}^{-3})$ | 0.70, -0.78                    | 0.15, -0.42                     |
| Flack x                                          | 0.080(6)                       | -0.006(4)                       |
| CCDC                                             | 2349182                        | 2349183                         |

**Figure S1** X-ray structure (30 % probability ellipsoids) of **3aa**, **6**, **12**, **13**, **1u** and **3ua**

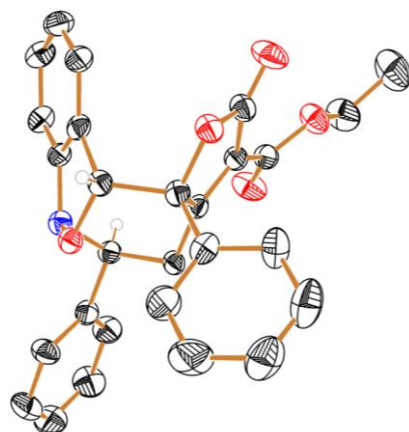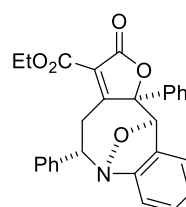

**Compound 3aa**

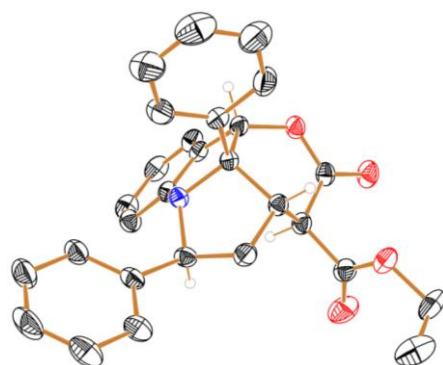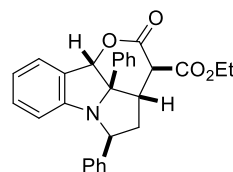

**Compound 6**

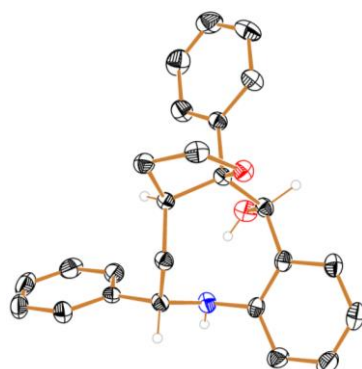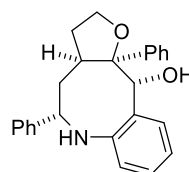

**Compound 12**

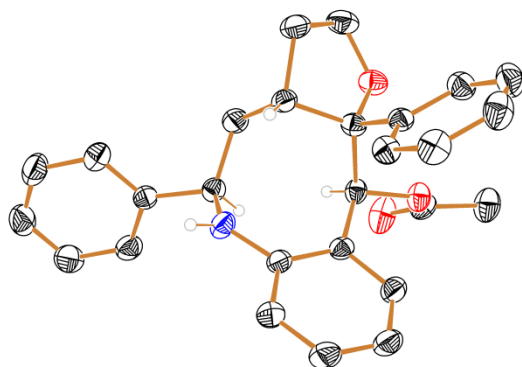

**Compound 13**

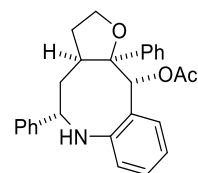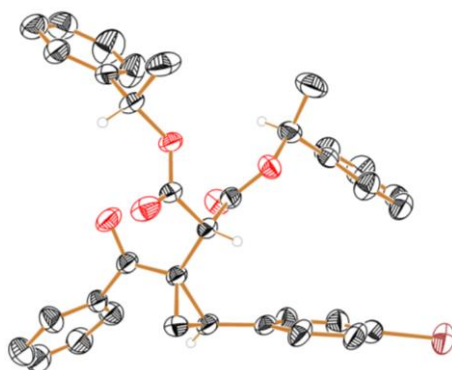

**Compound 1u**

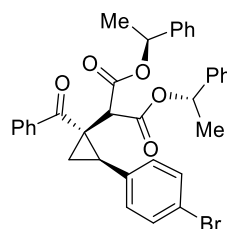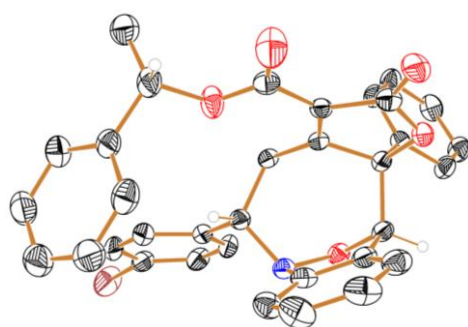

**Compound 3ua**

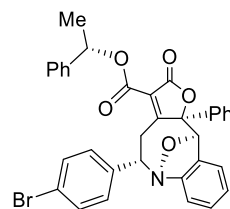

#### 4. References

1. Jiao, J.; Yang, G. Preparation of  $\alpha$ -(di(alkoxycarbonyl)methyl)chalcones and their application in the synthesis of multisubstituted cyclopropanes. *Chin. J. Org. Chem.* **2025**, 10.6023/cjoc202408023.
2. Chauhan, J.; Fletcher, S. One-pot synthesis of 2,1-benzisoxazoles (anthranils) by a stannous chloride-mediated tandem reduction–heterocyclization of 2-nitroacylbenzenes under neutral conditions. *Tetrahedron Lett.* **2012**, 53, 4951–4954.
3. (a) Chang, M.-Y.; Chen, Y.-C.; Chan, C.-K. One-pot synthesis of multifunctionalized cyclopropanes. *Tetrahedron* **2014**, 70, 2257–2263. (b) Qi, C.; Chen, W.; Yang, G. Catalyst-free Synthesis of Aroylmethylidene Malonates via Two-step in One Pot. *Chin. J. Syn. Chem.* **2021**, 29, 969–974.
4. Singh, R. R.; Skaria, M.; Chen, L.-Y.; Cheng, M.-J.; Liu, R.-S. Gold-catalyzed (4+3)-annulations of 2-alkenyl-1-alkynylbenzenes with anthranils with alkyne-dependent chemoselectivity: skeletal rearrangement *versus* non-rearrangement. *Chem. Sci.* **2019**, 10, 1201–1206.

## 5. Characterization data of compounds

### 5.1 Characterization data of cyclopropanes 1

All the cyclopropanes **1** were prepared as previously described.<sup>1</sup> The characterizing data for the new substrate **1u** and the related compounds (**15u**, **16u** and **1u'**) are as follows:

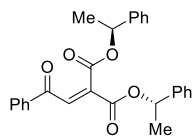

Bis((*S*)-1-phenylethyl) 2-(2-oxo-2-phenylethylidene)malonate (**15u**). Purified by column chromatography on silica gel (eluting with petroleum ether/ethyl acetate (v/v): 15/1) to afford a yellow oil in 65% yield (1400.4 mg).  $[\alpha]_D^{23} = -40.08$  (*c* 0.4, CHCl<sub>3</sub>). <sup>1</sup>H NMR (CDCl<sub>3</sub>, 500 MHz)  $\delta$  7.96 (d, *J* = 8.3 Hz, 2H), 7.87 (s, 1H), 7.68 – 7.60 (m, 1H), 7.54 – 7.47 (m, 2H), 7.39 – 7.24 (m, 10H), 6.13 (q, *J* = 6.5 Hz, 1H), 6.02 (q, *J* = 6.6 Hz, 1H), 1.61 (d, *J* = 6.6 Hz, 3H), 1.58 (d, *J* = 6.6 Hz, 3H). <sup>13</sup>C{<sup>1</sup>H} NMR (125 MHz, CDCl<sub>3</sub>)  $\delta$  189.1, 163.8, 162.1, 140.6, 140.4, 136.4, 136.02, 135.98, 134.2, 128.91, 128.89, 128.6, 128.4, 128.1, 128.0, 126.5, 126.0, 74.8, 74.2, 22.1, 21.0. HRMS (ESI) *m/z*: [M + Na]<sup>+</sup> Calcd for C<sub>27</sub>H<sub>24</sub>O<sub>5</sub>Na 451.1516, found 451.1513.

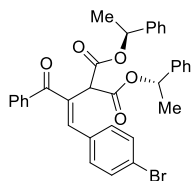

Bis((*S*)-1-phenylethyl) 2-((*E*)-1-(4-bromophenyl)-3-oxo-3-phenylprop-1-en-2-yl)malonate (**16u**). Purified by column chromatography on silica gel (eluting with petroleum ether/ethyl acetate (v/v): 6/1) to afford a yellow oil in 56% yield (999.6 mg).  $[\alpha]_D^{23} = -38.21$  (*c* 0.4, CHCl<sub>3</sub>). <sup>1</sup>H NMR (CDCl<sub>3</sub>, 500 MHz)  $\delta$  7.89 – 7.81 (m, 2H), 7.60 (t, *J* = 7.4 Hz, 1H), 7.55 – 7.46 (m, 4H), 7.41 – 7.31 (m, 11H), 7.25 (d, *J* = 8.3 Hz, 2H), 6.14 – 5.98 (m, 2H), 4.89 (s, 1H), 1.620 (d, *J* = 6.6 Hz, 3H), 1.618 (d, *J* = 6.6 Hz, 3H). <sup>13</sup>C{<sup>1</sup>H} NMR (125 MHz, CDCl<sub>3</sub>)  $\delta$  196.0, 166.5, 166.4, 143.0, 140.9, 140.5, 137.2, 134.9, 132.9, 132.1, 131.9, 130.2, 129.7, 128.3, 128.2, 127.9, 127.8, 126.3, 126.0, 123.5, 74.18, 74.17, 51.6, 21.8, 21.5. HRMS (ESI) *m/z*: [M + Na]<sup>+</sup> Calcd for C<sub>34</sub>H<sub>29</sub>BrO<sub>5</sub>Na 619.1091, found 619.1092.

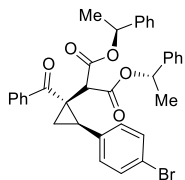

Bis((*S*)-1-phenylethyl) 2-((1*S*,2*R*)-1-benzoyl-2-(4-bromophenyl)cyclopropyl)malonate (**1u**). Purified by column chromatography on silica gel (eluting with petroleum ether/ethyl acetate (v/v): 10/1) to afford a white solid in 38% yield (462 mg). Mp: 120 – 121 °C.  $[\alpha]_D^{23} = -26.11$  (*c* 0.4, CHCl<sub>3</sub>). <sup>1</sup>H NMR (500 MHz, CDCl<sub>3</sub>)  $\delta$  7.57 (d, *J* = 6.6 Hz, 2H), 7.47 – 7.30 (m, 11H), 7.21 (d, *J* = 8.3 Hz, 2H), 7.13 (d, *J* = 6.9 Hz, 2H), 7.02 (d, *J* = 8.3 Hz, 2H), 5.96 (q, *J* = 6.5 Hz, 1H), 5.86 (q, *J* = 6.6 Hz, 1H), 3.08 – 2.98 (m, 1H), 2.85 (s, 1H), 1.98 – 1.83 (m, 1H), 1.72 – 1.66 (m, 1H), 1.60 (d, *J* = 6.5 Hz, 3H), 1.46 (d, *J* = 6.6 Hz, 3H). <sup>13</sup>C{<sup>1</sup>H} NMR (125 MHz, CDCl<sub>3</sub>)  $\delta$  202.3, 167.9, 167.3, 140.9, 140.6, 137.4, 134.1, 131.6, 130.8, 130.6, 128.48, 128.45, 128.1, 128.0, 127.8, 127.4, 126.3, 126.1, 121.4, 73.8, 73.5, 53.2, 37.8, 27.9, 21.9, 21.2, 16.3. HRMS (ESI) *m/z*: [M + H]<sup>+</sup> Calcd for C<sub>35</sub>H<sub>32</sub>BrO<sub>5</sub> 611.1428, found 611.1427.

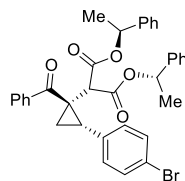

Bis((*S*)-1-phenylethyl) 2-((1*R*,2*S*)-1-benzoyl-2-(4-bromophenyl)cyclopropyl)malonate (**1u'**). Purified by column chromatography on silica gel (eluting with petroleum ether/ethyl acetate (v/v): 10/1) to afford a yellow oil in 43% yield (526.8 mg).  $[\alpha]_D^{23} = -66.79$  (*c* 0.4, CHCl<sub>3</sub>). <sup>1</sup>H NMR (500 MHz, CDCl<sub>3</sub>)  $\delta$  7.63 – 7.54 (m, 2H), 7.52 – 7.46 (m, 1H), 7.46 – 7.38 (m, 4H), 7.38 – 7.28 (m, 5H), 7.27 – 7.19 (m, 3H), 7.16 – 7.06 (m, 4H), 5.85 (q, *J* = 6.6 Hz, 1H), 5.77 (q, *J* = 6.6 Hz, 1H), 3.15 – 3.06 (m, 1H), 2.75 (s, 1H), 1.96 – 1.87 (m, 1H), 1.68 – 1.62 (m, 1H), 1.42 (d, *J* = 6.6 Hz, 3H), 1.35 (d, *J* = 6.6 Hz, 3H). <sup>13</sup>C{<sup>1</sup>H} NMR (125 MHz, CDCl<sub>3</sub>)  $\delta$  202.4, 168.0, 167.2, 141.3, 140.3, 137.7, 134.3, 131.7, 130.8, 130.6, 128.5, 128.3, 128.2, 128.1, 127.7, 127.5, 126.7, 125.9, 121.4, 74.2, 73.7, 53.3, 38.3, 27.4, 21.8, 21.1, 16.7. HRMS (ESI) *m/z*: [M + H]<sup>+</sup> Calcd for C<sub>35</sub>H<sub>32</sub>BrO<sub>5</sub> 611.1428, found 611.1427.

## 5.2 Characterization data of products 3

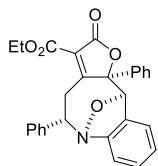

Ethyl 2-oxo-5,11a-diphenyl-4,5,11,11a-tetrahydro-2H-6,11-epoxybenzo[*b*]furo[2,3-*e*]azocine-3-carboxylate (**3aa**). Purified by column chromatography on silica gel (eluting with petroleum ether/ethyl acetate (v/v): 15/1 – 10/1) to afford a white solid in 96% yield (87.1 mg). Mp: 182 – 183 °C. <sup>1</sup>H NMR (500 MHz, CDCl<sub>3</sub>) δ 7.66 (d, *J* = 7.8 Hz, 2H), 7.53 (d, *J* = 7.8 Hz, 2H), 7.50 – 7.37 (m, 5H), 7.36 – 7.28 (m, 3H), 7.10 (t, *J* = 7.4 Hz, 1H), 6.90 (d, *J* = 7.8 Hz, 1H), 6.03 (s, 1H), 4.52 (dd, *J* = 10.3, 5.6 Hz, 1H), 4.34 – 4.21 (m, 2H), 3.53 (dd, *J* = 12.1, 5.4 Hz, 1H), 3.04 – 2.95 (m, 1H), 1.33 (t, *J* = 7.1 Hz, 3H). <sup>13</sup>C{<sup>1</sup>H} NMR (125 MHz, CDCl<sub>3</sub>) δ 174.9, 167.5, 160.5, 151.2, 142.5, 135.0, 130.3, 129.6, 129.2, 128.9, 127.7, 126.8, 126.3, 126.1, 124.68, 124.66, 120.8, 112.0, 88.1, 83.0, 68.3, 61.7, 34.7, 14.2. HRMS (ESI) *m/z*: [M + H]<sup>+</sup> Calcd for C<sub>28</sub>H<sub>24</sub>NO<sub>5</sub> 454.1649, found 454.1650.

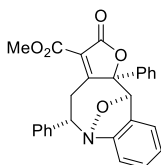

Methyl 2-oxo-5,11a-diphenyl-4,5,11,11a-tetrahydro-2H-6,11-epoxybenzo[*b*]furo[2,3-*e*]azocine-3-carboxylate (**3ba**). Purified by column chromatography on silica gel (eluting with petroleum ether/ethyl acetate (v/v): 15/1 – 10/1) to afford a white solid in 94% yield (82.5 mg). Mp: 204 – 205 °C. <sup>1</sup>H NMR (500 MHz, CDCl<sub>3</sub>) δ 7.72 – 7.61 (m, 2H), 7.55 (d, *J* = 7.3 Hz, 2H), 7.51 – 7.38 (m, 5H), 7.36 – 7.27 (m, 3H), 7.09 (t, *J* = 7.5 Hz, 1H), 6.91 (d, *J* = 7.8 Hz, 1H), 6.03 (s, 1H), 4.54 (dd, *J* = 10.4, 5.5 Hz, 1H), 3.82 (s, 3H), 3.57 (dd, *J* = 12.0, 5.6 Hz, 1H), 3.01 (dd, *J* = 11.9, 10.6 Hz, 1H). <sup>13</sup>C{<sup>1</sup>H} NMR (125 MHz, CDCl<sub>3</sub>) δ 176.0, 167.4, 161.0, 151.2, 142.4, 134.9, 130.3, 129.6, 129.2, 128.8, 127.6, 126.7, 126.2, 126.1, 124.6, 120.4, 112.0, 88.2, 82.9, 68.2, 52.5, 34.6. HRMS (ESI) *m/z*: [M + H]<sup>+</sup> Calcd for C<sub>27</sub>H<sub>22</sub>NO<sub>5</sub> 440.1492, found 440.1498.

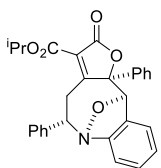

Isopropyl 2-oxo-5,11a-diphenyl-4,5,11,11a-tetrahydro-2H-6,11-epoxybenzo[*b*]furo[2,3-*e*]azocine-3-carboxylate (**3ca**). Purified by column chromatography on silica gel (eluting with petroleum ether/ethyl acetate (v/v): 15/1 – 10/1) to afford a white solid in 96% yield (89.7 mg). Mp: 190 – 191 °C. <sup>1</sup>H NMR (500 MHz, CDCl<sub>3</sub>) δ 7.73 – 7.62 (m, 2H), 7.54 (d, *J* = 7.8 Hz, 2H), 7.50 – 7.38 (m, 5H), 7.38 – 7.27 (m, 3H), 7.15 – 7.05 (m, 1H), 6.90 (d, *J* = 7.8 Hz, 1H), 6.03 (s, 1H), 5.21 – 5.07 (m, 1H), 4.53 (dd, *J* = 10.3, 5.7 Hz, 1H), 3.51 (dd, *J* = 12.2, 5.7 Hz, 1H), 2.99 (dd, *J* = 12.0, 10.6 Hz, 1H), 1.31 (d, *J* = 6.3 Hz, 6H). <sup>13</sup>C{<sup>1</sup>H} NMR (125 MHz, CDCl<sub>3</sub>) δ 173.5, 167.4, 159.8, 151.2, 142.5, 135.0, 130.1, 129.5, 129.1, 128.8, 127.6, 126.8, 126.2, 126.0, 124.65, 124.60, 121.1, 111.8, 87.9, 82.9, 69.4, 68.2, 34.6, 21.86, 21.81. HRMS (ESI) *m/z*: [M + H]<sup>+</sup> Calcd for C<sub>29</sub>H<sub>26</sub>NO<sub>5</sub> 468.1805, found 468.1803.

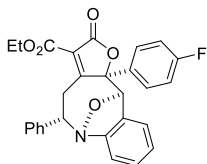

Ethyl 11a-(4-fluorophenyl)-2-oxo-5-phenyl-4,5,11,11a-tetrahydro-2H-6,11-epoxybenzo[*b*]furo[2,3-*e*]azocine-3-carboxylate (**3da**). Purified by column chromatography on silica gel (eluting with petroleum ether/ethyl acetate (v/v): 15/1 – 10/1) to afford a white solid in 86% yield (81.0 mg). Mp: 185 – 186 °C. <sup>1</sup>H NMR (500 MHz, CDCl<sub>3</sub>) δ 7.72 – 7.62 (m, 2H), 7.53 (d, *J* = 7.3 Hz, 2H), 7.47 – 7.39 (m, 2H), 7.37 – 7.28 (m, 3H), 7.21 – 7.05 (m, 3H), 6.91 (d, *J* = 7.9 Hz, 1H), 5.98 (s, 1H), 4.53 (dd, *J* = 10.4, 5.6 Hz, 1H), 4.35 – 4.20 (m, 2H), 3.55 (dd, *J* = 12.1, 5.6 Hz, 1H), 2.95 (dd, *J* = 12.1, 10.5 Hz, 1H), 1.33 (t, *J* = 7.1 Hz, 3H). <sup>13</sup>C{<sup>1</sup>H} NMR (125 MHz, CDCl<sub>3</sub>) δ 174.5, 167.2, 163.2 (d, <sup>1</sup>*J*<sub>FC</sub> = 250.0 Hz), 160.3, 151.2, 142.4, 130.9 (d, <sup>4</sup>*J*<sub>FC</sub> = 3.1 Hz), 130.4, 128.9, 128.3 (d, <sup>3</sup>*J*<sub>FC</sub> = 8.4 Hz), 127.7, 126.6, 126.0, 124.7, 124.6, 120.8, 116.2 (d, <sup>2</sup>*J*<sub>FC</sub> = 21.7 Hz), 112.0, 87.6, 83.0, 68.2, 61.7, 34.6, 14.1. <sup>19</sup>F NMR (470 MHz, CDCl<sub>3</sub>) δ –111.3. HRMS (ESI) *m/z*: [M + H]<sup>+</sup> Calcd for C<sub>28</sub>H<sub>23</sub>FNO<sub>5</sub> 472.1555, found 472.1562.



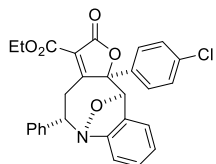

Ethyl 11a-(4-chlorophenyl)-2-oxo-5-phenyl-4,5,11,11a-tetrahydro-2H-6,11-epoxybenzo[b]furo[2,3-e]azocine-3-carboxylate (**3ea**). Purified by column chromatography on silica gel (eluting with petroleum ether/ethyl acetate (v/v): 15/1 – 10/1) to afford a white solid in 80% yield (77.9 mg). Mp: 194 – 195 °C. <sup>1</sup>H NMR (500 MHz, CDCl<sub>3</sub>) δ 7.66 – 7.58 (m, 2H), 7.56 – 7.49 (m, 2H), 7.47 – 7.38 (m, 4H), 7.36 – 7.28 (m, 3H), 7.14 – 7.05 (m, 1H), 6.90 (d, *J* = 8.1 Hz, 1H), 5.96 (s, 1H), 4.52 (dd, *J* = 10.4, 5.6 Hz, 1H), 4.35 – 4.19 (m, 2H), 3.55 (dd, *J* = 12.1, 5.6 Hz, 1H), 2.94 (dd, *J* = 12.1, 10.4 Hz, 1H), 1.33 (t, *J* = 7.1 Hz, 3H). <sup>13</sup>C{<sup>1</sup>H} NMR (125 MHz, CDCl<sub>3</sub>) δ 174.3, 167.1, 160.3, 151.1, 142.3, 135.8, 133.6, 130.4, 129.4, 128.9, 127.73, 127.71, 126.5, 126.0, 124.7, 124.6, 120.9, 112.0, 87.5, 82.9, 68.2, 61.7, 34.6, 14.1. HRMS (ESI) *m/z*: [M + H]<sup>+</sup> Calcd for C<sub>28</sub>H<sub>23</sub>ClNO<sub>5</sub> 488.1259 found 488.1257.

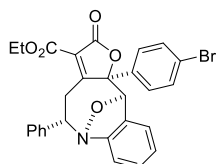

Ethyl 11a-(4-bromophenyl)-2-oxo-5-phenyl-4,5,11,11a-tetrahydro-2H-6,11-epoxybenzo[b]furo[2,3-e]azocine-3-carboxylate (**3fa**). Purified by column chromatography on silica gel (eluting with petroleum ether/ethyl acetate (v/v): 15/1 – 10/1) to afford a white solid in 76% yield (80.7 mg). Mp: 212 – 213 °C. <sup>1</sup>H NMR (500 MHz, CDCl<sub>3</sub>) δ 7.64 – 7.49 (m, 6H), 7.45 – 7.38 (m, 2H), 7.37 – 7.28 (m, 3H), 7.10 (t, *J* = 7.3 Hz, 1H), 6.90 (d, *J* = 8.1 Hz, 1H), 5.95 (s, 1H), 4.52 (dd, *J* = 10.4, 5.6 Hz, 1H), 4.34 – 4.20 (m, 2H), 3.54 (dd, *J* = 12.1, 5.6 Hz, 1H), 2.94 (dd, *J* = 12.0, 10.5 Hz, 1H), 1.33 (t, *J* = 7.1 Hz, 3H). <sup>13</sup>C{<sup>1</sup>H} NMR (125 MHz, CDCl<sub>3</sub>) δ 174.3, 167.1, 160.3, 151.2, 142.3, 134.2, 132.4, 130.4, 128.9, 128.0, 127.8, 126.5, 126.0, 124.7, 124.6, 124.0, 120.9, 112.0, 87.6, 82.9, 68.2, 61.7, 34.6, 14.1. HRMS (ESI) *m/z*: [M + H]<sup>+</sup> Calcd for C<sub>28</sub>H<sub>23</sub>BrNO<sub>5</sub> 532.0754, found 532.0753.

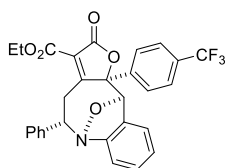

Ethyl 2-oxo-5-phenyl-11a-(4-(trifluoromethyl)phenyl)-4,5,11,11a-tetrahydro-2H-6,11-epoxybenzo[b]furo[2,3-e]azocine-3-carboxylate (**3ga**). Purified by column chromatography on silica gel (eluting with petroleum ether/ethyl acetate (v/v): 15/1 – 10/1) to afford a white solid in 96% yield (100.0 mg). Mp: 200 – 201 °C. <sup>1</sup>H NMR (500 MHz, CDCl<sub>3</sub>) δ 7.84 (d, *J* = 8.2 Hz, 2H), 7.72 (d, *J* = 8.2 Hz, 2H), 7.54 (d, *J* = 7.5 Hz, 2H), 7.48 – 7.38 (m, 2H), 7.37 – 7.27 (m, 3H), 7.17 – 7.04 (m, 1H), 6.91 (d, *J* = 8.0 Hz, 1H), 5.98 (s, 1H), 4.55 (dd, *J* = 10.2, 5.6 Hz, 1H), 4.39 – 4.13 (m, 2H), 3.57 (dd, *J* = 12.1, 5.6 Hz, 1H), 3.05 – 2.81 (m, 1H), 1.33 (t, *J* = 7.1 Hz, 3H). <sup>13</sup>C{<sup>1</sup>H} NMR (125 MHz, CDCl<sub>3</sub>) δ 173.9, 167.0, 160.2, 151.2, 142.2, 139.3, 131.8 (q, <sup>2</sup>*J*<sub>FC</sub> = 32.9 Hz), 130.5, 128.9, 127.8, 126.8, 126.3, 126.2 (q, <sup>3</sup>*J*<sub>FC</sub> = 3.2 Hz), 126.0, 124.8, 124.6, 123.6 (q, <sup>1</sup>*J*<sub>FC</sub> = 272.8 Hz), 121.2, 112.0, 87.4, 83.0, 68.2, 61.8, 34.6, 14.1. <sup>19</sup>F NMR (470 MHz, CDCl<sub>3</sub>) δ –62.9. HRMS (ESI) *m/z*: [M + H]<sup>+</sup> Calcd for C<sub>29</sub>H<sub>23</sub>F<sub>3</sub>NO<sub>5</sub> 522.1523, found 522.1516.

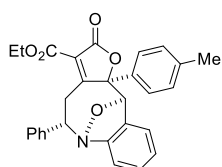

Ethyl 2-oxo-5-phenyl-11a-(*p*-tolyl)-4,5,11,11a-tetrahydro-2H-6,11-epoxybenzo[b]furo[2,3-e]azocine-3-carboxylate (**3ha**). Purified by column chromatography on silica gel (eluting with petroleum ether/ethyl acetate (v/v): 15/1 – 10/1) to afford a white solid in 96% yield (89.7 mg). Mp: 205 – 206 °C. <sup>1</sup>H NMR (500 MHz, CDCl<sub>3</sub>) δ 7.57 – 7.50 (m, 4H), 7.45 – 7.37 (m, 2H), 7.35 – 7.22 (m, 5H), 7.13 – 7.05 (m, 1H), 6.90 (d, *J* = 7.8 Hz, 1H), 6.01 (s, 1H), 4.51 (dd, *J* = 10.4, 5.6 Hz, 1H), 4.34 – 4.20 (m, 2H), 3.52 (dd, *J* = 12.1, 5.6 Hz, 1H), 2.99 (dd, *J* = 12.0, 10.5 Hz, 1H), 2.37 (s, 3H), 1.33 (t, *J* = 7.1 Hz, 3H). <sup>13</sup>C{<sup>1</sup>H} NMR (125 MHz, CDCl<sub>3</sub>) δ 175.0, 167.6, 160.5, 151.2, 142.5, 139.7, 131.9, 130.2, 129.9, 128.8, 127.7, 126.9, 126.2, 126.1, 124.6, 120.7, 112.0, 88.1, 82.9, 68.3, 61.6, 34.6, 21.2, 14.2. HRMS (ESI) *m/z*: [M + H]<sup>+</sup> Calcd for C<sub>29</sub>H<sub>26</sub>NO<sub>5</sub> 468.1805, found 468.1804.

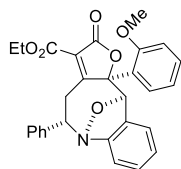

Ethyl 11a-(2-methoxyphenyl)-2-oxo-5-phenyl-4,5,11,11a-tetrahydro-2H-6,11-epoxybenzo[b]furo[2,3-*e*]azocine-3-carboxylate (**3ia**). Purified by column chromatography on silica gel (eluting with petroleum ether/ethyl acetate (v/v): 15/1 – 10/1) to afford a white solid in 95% yield (91.7 mg). Mp: 180 – 181 °C. <sup>1</sup>H NMR (500 MHz, CDCl<sub>3</sub>) δ 7.90 (dd, *J* = 7.8, 1.1 Hz, 1H), 7.49 (d, *J* = 7.6 Hz, 2H), 7.45 – 7.34 (m, 3H), 7.33 – 7.24 (m, 3H), 7.17 – 7.04 (m, 2H), 6.89 (d, *J* = 8.0 Hz, 2H), 6.19 (s, 1H), 4.51 (dd, *J* = 10.3, 5.7 Hz, 1H), 4.35 – 4.20 (m, 2H), 3.66 (s, 3H), 3.54 (dd, *J* = 12.0, 5.7 Hz, 1H), 2.87 (dd, *J* = 11.8, 10.7 Hz, 1H), 1.33 (t, *J* = 7.1 Hz, 3H). <sup>13</sup>C{<sup>1</sup>H} NMR (125 MHz, CDCl<sub>3</sub>) δ 173.2, 168.0, 160.8, 158.8, 151.6, 142.6, 131.2, 130.0, 128.9, 128.7, 127.5, 126.8, 126.1, 124.70, 124.65, 122.1, 121.8, 120.9, 112.3, 111.9, 87.2, 81.9, 67.9, 61.2, 55.6, 34.7, 14.2. HRMS (ESI) *m/z*: [M + H]<sup>+</sup> Calcd for C<sub>29</sub>H<sub>26</sub>NO<sub>6</sub> 484.1755, found 484.1747.

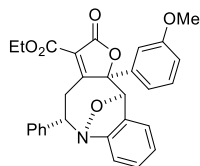

Ethyl 11a-(3-methoxyphenyl)-2-oxo-5-phenyl-4,5,11,11a-tetrahydro-2H-6,11-epoxybenzo[b]furo[2,3-*e*]azocine-3-carboxylate (**3ja**). Purified by column chromatography on silica gel (eluting with petroleum ether/ethyl acetate (v/v): 15/1 – 10/1) to afford a white solid in 93% yield (89.6 mg). Mp: 190 – 191 °C. <sup>1</sup>H NMR (500 MHz, CDCl<sub>3</sub>) δ 7.54 (d, *J* = 7.3 Hz, 2H), 7.47 – 7.23 (m, 7H), 7.22 – 7.14 (m, 1H), 7.13 – 7.05 (m, 1H), 6.99 – 6.92 (m, 1H), 6.90 (d, *J* = 7.8 Hz, 1H), 6.00 (s, 1H), 4.52 (dd, *J* = 10.4, 5.6 Hz, 1H), 4.34 – 4.19 (m, 2H), 3.82 (s, 3H), 3.54 (dd, *J* = 12.1, 5.6 Hz, 1H), 3.04 (dd, *J* = 12.1, 10.5 Hz, 1H), 1.33 (t, *J* = 7.1 Hz, 3H). <sup>13</sup>C{<sup>1</sup>H} NMR (125 MHz, CDCl<sub>3</sub>) δ 174.8, 167.4, 160.4, 160.1, 151.2, 142.5, 136.5, 130.3, 128.8, 127.7, 126.8, 126.1, 124.66, 124.63, 120.7, 118.4, 114.8, 112.2, 112.0, 87.9, 83.0, 68.2, 61.6, 55.4, 34.7, 14.2. HRMS (ESI) *m/z*: [M + H]<sup>+</sup> Calcd for C<sub>29</sub>H<sub>26</sub>NO<sub>6</sub> 484.1755, found 484.1754.

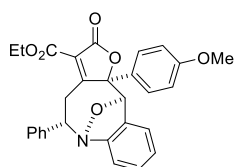

Ethyl 11a-(4-methoxyphenyl)-2-oxo-5-phenyl-4,5,11,11a-tetrahydro-2H-6,11-epoxybenzo[b]furo[2,3-*e*]azocine-3-carboxylate (**3ka**). Purified by column chromatography on silica gel (eluting with petroleum ether/ethyl acetate (v/v): 15/1 – 10/1) to afford a white solid in 95% yield (91.8 mg). Mp: 182 – 183 °C. <sup>1</sup>H NMR (500 MHz, CDCl<sub>3</sub>) δ 7.62 – 7.48 (m, 4H), 7.46 – 7.37 (m, 2H), 7.35 – 7.27 (m, 3H), 7.09 (t, *J* = 7.4 Hz, 1H), 7.00 – 6.94 (m, 2H), 6.90 (d, *J* = 7.8 Hz, 1H), 6.00 (s, 1H), 4.52 (dd, *J* = 10.4, 5.6 Hz, 1H), 4.35 – 4.19 (m, 2H), 3.82 (s, 3H), 3.53 (dd, *J* = 12.0, 5.6 Hz, 1H), 2.98 (dd, *J* = 11.9, 10.6 Hz, 1H), 1.33 (t, *J* = 7.1 Hz, 3H). <sup>13</sup>C{<sup>1</sup>H} NMR (125 MHz, CDCl<sub>3</sub>) δ 175.0, 167.4, 160.5, 160.4, 151.2, 142.5, 130.2, 128.8, 127.7, 127.6, 126.9, 126.6, 126.0, 124.6, 120.6, 114.5, 111.9, 88.0, 82.9, 68.2, 61.6, 55.4, 34.6, 14.1. HRMS (ESI) *m/z*: [M + H]<sup>+</sup> Calcd for C<sub>29</sub>H<sub>26</sub>NO<sub>6</sub> 484.1755, found 484.1752.

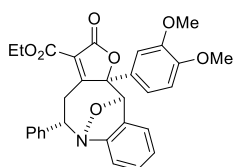

Ethyl 11a-(3,4-dimethoxyphenyl)-2-oxo-5-phenyl-4,5,11,11a-tetrahydro-2H-6,11-epoxybenzo[b]furo[2,3-*e*]azocine-3-carboxylate (**3la**). Purified by column chromatography on silica gel (eluting with petroleum ether/ethyl acetate (v/v): 15/1 – 10/1) to afford a white solid in 95% yield (97.5 mg). Mp: 176 – 177 °C. <sup>1</sup>H NMR (500 MHz, CDCl<sub>3</sub>) δ 7.53 (d, *J* = 7.4 Hz, 2H), 7.45 – 7.36 (m, 2H), 7.36 – 7.26 (m, 4H), 7.13 – 7.03 (m, 2H), 6.99 – 6.84 (m, 2H), 5.97 (s, 1H), 4.52 (dd, *J* = 10.3, 5.6 Hz, 1H), 4.35 – 4.20 (m, 2H), 3.89 (s, 3H), 3.87 (s, 3H), 3.54 (dd, *J* = 12.1, 5.7 Hz, 1H), 3.04 (dd, *J* = 11.8, 10.7 Hz, 1H), 1.32 (t, *J* = 7.1 Hz, 3H). <sup>13</sup>C{<sup>1</sup>H} NMR (125 MHz, CDCl<sub>3</sub>) δ 175.0, 167.5, 160.4, 151.1, 149.9, 149.3, 142.5, 130.2, 128.8, 127.6, 127.1, 126.8, 126.0, 124.6, 120.4, 119.0, 111.9, 111.3, 109.0, 88.0, 83.2, 68.1, 61.6, 56.0, 55.9, 34.6, 14.1. HRMS (ESI) *m/z*: [M + H]<sup>+</sup> Calcd for C<sub>30</sub>H<sub>28</sub>NO<sub>7</sub> 514.1860, found 514.1862.

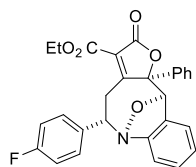

Ethyl 5-(4-fluorophenyl)-2-oxo-11a-phenyl-4,5,11,11a-tetrahydro-2H-6,11-epoxybenzo[*b*]furo[2,3-*e*]azocine-3-carboxylate (**3ma**). Purified by column chromatography on silica gel (eluting with petroleum ether/ethyl acetate (v/v): 15/1 – 10/1) to afford a white solid in 93% yield (87.5 mg). Mp: 170 – 171 °C. <sup>1</sup>H NMR (500 MHz, CDCl<sub>3</sub>) δ 7.69 – 7.61 (m, 2H), 7.54 – 7.40 (m, 5H), 7.36 – 7.28 (m, 2H), 7.16 – 7.03 (m, 3H), 6.89 (d, *J* = 7.8 Hz, 1H), 6.02 (s, 1H), 4.51 (dd, *J* = 10.4, 5.6 Hz, 1H), 4.34 – 4.19 (m, 2H), 3.51 (dd, *J* = 12.1, 5.6 Hz, 1H), 2.94 (dd, *J* = 12.0, 10.5 Hz, 1H), 1.32 (t, *J* = 7.1 Hz, 3H). <sup>13</sup>C{<sup>1</sup>H} NMR (125 MHz, CDCl<sub>3</sub>) δ 174.7, 167.4, 162.2 (d, <sup>1</sup>*J*<sub>FC</sub> = 246.3 Hz), 160.5, 151.1, 138.3 (d, <sup>4</sup>*J*<sub>FC</sub> = 3.1 Hz), 134.9, 130.3, 129.7, 129.2, 127.8 (d, <sup>3</sup>*J*<sub>FC</sub> = 8.1 Hz), 126.8, 126.2, 124.8, 124.7, 120.9, 115.7 (d, <sup>2</sup>*J*<sub>FC</sub> = 21.5 Hz), 112.0, 88.0, 83.0, 67.6, 61.7, 34.7, 14.2. <sup>19</sup>F NMR (470 MHz, CDCl<sub>3</sub>) δ –114.8. HRMS (ESI) *m/z*: [M + H]<sup>+</sup> Calcd for C<sub>28</sub>H<sub>23</sub>FNO<sub>5</sub> 472.1555, found 472.1546.

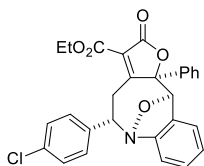

Ethyl 5-(4-chlorophenyl)-2-oxo-11a-phenyl-4,5,11,11a-tetrahydro-2H-6,11-epoxybenzo[*b*]furo[2,3-*e*]azocine-3-carboxylate (**3na**). Purified by column chromatography on silica gel (eluting with petroleum ether/ethyl acetate (v/v): 15/1 – 10/1) to afford a white solid in 94% yield (91.5 mg). Mp: 196 – 197 °C. <sup>1</sup>H NMR (500 MHz, CDCl<sub>3</sub>) δ 7.69 – 7.59 (m, 2H), 7.51 – 7.40 (m, 5H), 7.40 – 7.35 (m, 2H), 7.35 – 7.28 (m, 2H), 7.15 – 7.06 (m, 1H), 6.89 (d, *J* = 7.8 Hz, 1H), 6.02 (s, 1H), 4.51 (dd, *J* = 10.4, 5.6 Hz, 1H), 4.34 – 4.18 (m, 2H), 3.52 (dd, *J* = 12.1, 5.6 Hz, 1H), 2.93 (dd, *J* = 12.0, 10.5 Hz, 1H), 1.32 (t, *J* = 7.1 Hz, 3H). <sup>13</sup>C{<sup>1</sup>H} NMR (125 MHz, CDCl<sub>3</sub>) δ 174.6, 167.3, 160.5, 151.0, 141.0, 134.9, 133.5, 130.4, 129.7, 129.3, 129.0, 127.5, 126.8, 126.2, 124.8, 124.7, 120.9, 112.0, 88.0, 83.0, 67.6, 61.7, 34.5, 14.2. HRMS (ESI) *m/z*: [M + H]<sup>+</sup> Calcd for C<sub>28</sub>H<sub>23</sub>ClNO<sub>5</sub> 488.1259, found 488.1254.

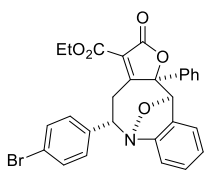

Ethyl 5-(4-bromophenyl)-2-oxo-11a-phenyl-4,5,11,11a-tetrahydro-2H-6,11-epoxybenzo[*b*]furo[2,3-*e*]azocine-3-carboxylate (**3oa**). Purified by column chromatography on silica gel (eluting with petroleum ether/ethyl acetate (v/v): 15/1 – 10/1) to afford a white solid in 91% yield (100.3 mg). Mp: 205 – 206 °C. <sup>1</sup>H NMR (500 MHz, CDCl<sub>3</sub>) δ 7.70 – 7.58 (m, 2H), 7.58 – 7.50 (m, 2H), 7.50 – 7.37 (m, 5H), 7.37 – 7.28 (m, 2H), 7.16 – 7.07 (m, 1H), 6.89 (d, *J* = 7.8 Hz, 1H), 6.02 (s, 1H), 4.49 (dd, *J* = 10.4, 5.6 Hz, 1H), 4.34 – 4.19 (m, 2H), 3.52 (dd, *J* = 12.1, 5.6 Hz, 1H), 2.92 (dd, *J* = 12.0, 10.5 Hz, 1H), 1.32 (t, *J* = 7.1 Hz, 3H). <sup>13</sup>C NMR (125 MHz, CDCl<sub>3</sub>) δ 174.6, 167.3, 160.5, 151.0, 141.5, 134.9, 131.9, 130.4, 129.7, 129.3, 127.9, 126.8, 126.2, 124.8, 124.7, 121.6, 121.0, 112.0, 88.0, 83.0, 67.6, 61.7, 34.4, 14.2. HRMS (ESI) *m/z*: [M + Na]<sup>+</sup> Calcd for C<sub>28</sub>H<sub>22</sub>BrNO<sub>5</sub>Na 554.0574, found 554.0569.

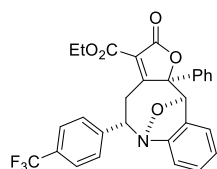

Ethyl 2-oxo-11a-phenyl-5-(4-(trifluoromethyl)phenyl)-4,5,11,11a-tetrahydro-2H-6,11-epoxybenzo[*b*]furo[2,3-*e*]azocine-3-carboxylate (**3pa**). Purified by column chromatography on silica gel (eluting with petroleum ether/ethyl acetate (v/v): 15/1 – 10/1) to afford a white solid in 90% yield (93.7 mg). Mp: 193 – 194 °C. <sup>1</sup>H NMR (500 MHz, CDCl<sub>3</sub>) δ 7.76 – 7.58 (m, 6H), 7.52 – 7.39 (m, 3H), 7.38 – 7.29 (m, 2H), 7.17 – 7.07 (m, 1H), 6.89 (d, *J* = 7.8 Hz, 1H), 6.04 (s, 1H), 4.59 (dd, *J* = 10.4, 5.6 Hz, 1H), 4.36 – 4.20 (m, 2H), 3.56 (dd, *J* = 12.1, 5.6 Hz, 1H), 2.93 (dd, *J* = 12.0, 10.5 Hz, 1H), 1.33 (t, *J* = 7.1 Hz, 3H). <sup>13</sup>C{<sup>1</sup>H} NMR (125 MHz, CDCl<sub>3</sub>) δ 174.4, 167.2, 160.5, 150.9, 146.3, 134.8, 130.4, 130.0 (q, <sup>2</sup>*J*<sub>FC</sub> = 32.5 Hz), 129.7, 129.3, 126.8, 126.6, 126.2, 125.8 (q, <sup>3</sup>*J*<sub>FC</sub> = 3.7 Hz), 124.9, 124.8, 124.0 (q, <sup>1</sup>*J*<sub>FC</sub> = 272.0 Hz), 121.1, 112.0, 88.0, 83.1, 67.7, 61.8, 34.3, 14.2. <sup>19</sup>F NMR (470 MHz, CDCl<sub>3</sub>) δ –62.5. HRMS (ESI) *m/z*: [M + H]<sup>+</sup> Calcd for C<sub>29</sub>H<sub>23</sub>F<sub>3</sub>NO<sub>5</sub> 522.1523, found 522.1530.

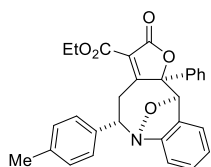

Ethyl 2-oxo-11a-phenyl-5-(*p*-tolyl)-4,5,11,11a-tetrahydro-2*H*-6,11-epoxybenzo[*b*]furo[2,3-*e*]azocine-3-carboxylate (**3qa**). Purified by column chromatography on silica gel (eluting with petroleum ether/ethyl acetate (v/v): 15/1 – 10/1) to afford a white solid in 95% yield (88.6 mg). Mp: 192 – 193 °C. <sup>1</sup>H NMR (500 MHz, CDCl<sub>3</sub>) δ 7.71 – 7.62 (m, 2H), 7.52 – 7.38 (m, 5H), 7.36 – 7.28 (m, 2H), 7.22 (d, *J* = 7.9 Hz, 2H), 7.14 – 7.05 (m, 1H), 6.89 (d, *J* = 7.8 Hz, 1H), 6.02 (s, 1H), 4.50 (dd, *J* = 10.4, 5.6 Hz, 1H), 4.34 – 4.20 (m, 2H), 3.52 (dd, *J* = 12.1, 5.6 Hz, 1H), 2.99 (dd, *J* = 12.0, 10.5 Hz, 1H), 2.37 (s, 3H), 1.33 (t, *J* = 7.1 Hz, 3H). <sup>13</sup>C{<sup>1</sup>H} NMR (125 MHz, CDCl<sub>3</sub>) δ 174.9, 167.5, 160.4, 151.3, 139.6, 137.4, 135.0, 130.2, 129.6, 129.5, 129.2, 126.8, 126.2, 126.0, 124.61, 124.57, 120.7, 111.9, 88.0, 82.9, 68.1, 61.6, 34.7, 21.1, 14.2. HRMS (ESI) *m/z*: [M + H]<sup>+</sup> Calcd for C<sub>29</sub>H<sub>26</sub>NO<sub>5</sub> 468.1805, found 468.1810.

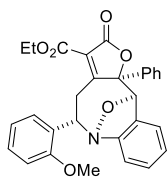

Ethyl 5-(2-methoxyphenyl)-2-oxo-11a-phenyl-4,5,11,11a-tetrahydro-2*H*-6,11-epoxybenzo[*b*]furo[2,3-*e*]azocine-3-carboxylate (**3ra**). Purified by column chromatography on silica gel (eluting with petroleum ether/ethyl acetate (v/v): 15/1 – 10/1) to afford a white solid in 45% yield (43.5 mg). Mp: 195 – 196 °C. <sup>1</sup>H NMR (500 MHz, CDCl<sub>3</sub>) δ 7.75 (dd, *J* = 7.6, 1.6 Hz, 1H), 7.71 – 7.62 (m, 2H), 7.49 – 7.38 (m, 3H), 7.36 – 7.26 (m, 3H), 7.13 – 7.03 (m, 2H), 6.96 – 6.86 (m, 2H), 6.02 (s, 1H), 4.93 (dd, *J* = 10.2, 5.7 Hz, 1H), 4.38 – 4.28 (m, 1H), 4.28 – 4.19 (m, 1H), 3.88 (s, 3H), 3.67 (dd, *J* = 12.0, 5.7 Hz, 1H), 2.84 (dd, *J* = 12.0, 10.2 Hz, 1H), 1.32 (t, *J* = 7.1 Hz, 3H). <sup>13</sup>C{<sup>1</sup>H} NMR (125 MHz, CDCl<sub>3</sub>) δ 174.2, 167.8, 160.3, 155.5, 151.2, 135.2, 130.9, 130.1, 129.5, 129.1, 128.8, 127.5, 126.9, 126.3, 124.52, 124.49, 121.3, 121.0, 112.2, 110.3, 88.2, 82.8, 62.6, 61.4, 55.4, 32.2, 14.1. HRMS (ESI) *m/z*: [M + H]<sup>+</sup> Calcd for C<sub>29</sub>H<sub>26</sub>NO<sub>6</sub> 484.1755, found 484.1752.

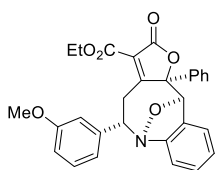

Ethyl 5-(3-methoxyphenyl)-2-oxo-11a-phenyl-4,5,11,11a-tetrahydro-2*H*-6,11-epoxybenzo[*b*]furo[2,3-*e*]azocine-3-carboxylate (**3sa**). Purified by column chromatography on silica gel (eluting with petroleum ether/ethyl acetate (v/v): 15/1 – 10/1) to afford a white solid in 95% yield (91.6 mg). Mp: 183 – 184 °C. <sup>1</sup>H NMR (500 MHz, CDCl<sub>3</sub>) δ 7.72 – 7.62 (m, 2H), 7.51 – 7.39 (m, 3H), 7.38 – 7.27 (m, 3H), 7.17 – 7.05 (m, 3H), 6.95 – 6.83 (m, 2H), 6.01 (s, 1H), 4.50 (dd, *J* = 10.4, 5.6 Hz, 1H), 4.35 – 4.19 (m, 2H), 3.85 (s, 3H), 3.53 (dd, *J* = 12.1, 5.6 Hz, 1H), 2.99 (dd, *J* = 12.0, 10.4 Hz, 1H), 1.33 (t, *J* = 7.1 Hz, 3H). <sup>13</sup>C{<sup>1</sup>H} NMR (125 MHz, CDCl<sub>3</sub>) δ 174.7, 167.4, 160.4, 160.0, 151.2, 144.0, 135.0, 130.2, 129.9, 129.6, 129.2, 126.8, 126.2, 124.6, 120.8, 118.3, 112.9, 111.96, 111.95, 88.0, 82.9, 68.1, 61.6, 55.3, 34.5, 14.2. HRMS (ESI) *m/z*: [M + H]<sup>+</sup> Calcd for C<sub>29</sub>H<sub>26</sub>NO<sub>6</sub> 484.1755, found 484.1750.

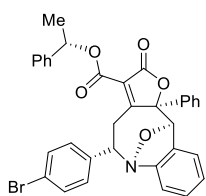

(*S*)-1-phenylethyl (5*S*, 6*R*, 11*R*, 11*aR*)-5-(4-bromophenyl)-2-oxo-11a-phenyl-4,5,11,11a-tetrahydro-2*H*-6,11-epoxybenzo[*b*]furo[2,3-*e*]azocine-3-carboxylate (**3ua**). Purified by column chromatography on silica gel (eluting with petroleum ether/ethyl acetate (v/v): 10/1) to afford a white solid in 63% yield (38 mg). Mp: 156 – 157 °C. [α]<sub>D</sub><sup>23</sup> = –63.58 (*c* 0.4, CHCl<sub>3</sub>). <sup>1</sup>H NMR (500 MHz, CDCl<sub>3</sub>) δ 7.68 – 7.62 (m, 2H), 7.53 – 7.43 (m, 5H), 7.41 – 7.29 (m, 7H), 7.21 (d, *J* = 8.4 Hz, 2H), 7.16 – 7.12 (m, 1H), 6.80 (d, *J* = 7.8 Hz, 1H), 6.03 (s, 1H), 6.01 (q, *J* = 6.6 Hz, 1H), 4.32 (dd, *J* = 10.4, 5.7 Hz, 1H), 3.47 (dd, *J* = 12.1, 5.7 Hz, 1H), 2.89 (dd, *J* = 12.0, 10.5 Hz, 1H), 1.62 (d, *J* = 6.6 Hz, 3H). <sup>13</sup>C{<sup>1</sup>H} NMR (125 MHz, CDCl<sub>3</sub>) δ 173.7, 167.2, 159.4, 150.9, 141.3, 140.3, 134.8, 131.8, 130.2, 129.6, 129.2, 128.7, 128.4, 127.8, 126.8, 126.4, 126.2, 124.81, 124.77, 121.6, 120.8, 111.8, 87.9, 83.0, 73.8, 67.4, 34.3, 21.6. HRMS (ESI) *m/z*: [M + H]<sup>+</sup> Calcd for C<sub>34</sub>H<sub>27</sub>NBrO<sub>5</sub> 608.1067, found 608.1073.

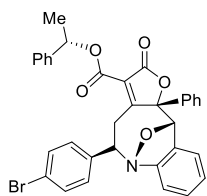

(*S*)-1-phenylethyl (5*R*, 6*S*, 11*S*, 11*aS*)-5-(4-bromophenyl)-2-oxo-11*a*-phenyl-4,5,11,11*a*-tetrahydro-2*H*-6,11-epoxybenzo[*b*]furo[2,3-*e*]azocine-3-carboxylate (**3ua'**). Purified by column chromatography on silica gel (eluting with petroleum ether/ethyl acetate (v/v): 10/1) to afford a yellow oil in 29% yield (17.8 mg).  $[\alpha]_D^{23} = -40.84$  (*c* 0.4, CHCl<sub>3</sub>). <sup>1</sup>H NMR (500 MHz, CDCl<sub>3</sub>)  $\delta$  7.68 – 7.63 (m, 2H), 7.51 – 7.43 (m, 5H), 7.41 – 7.33 (m, 6H), 7.25 (t, *J* = 7.3 Hz, 1H), 7.19 (d, *J* = 8.4 Hz, 2H), 7.12 (t, *J* = 7.5 Hz, 1H), 6.83 (d, *J* = 7.8 Hz, 1H), 6.03 (s, 1H), 5.99 (q, *J* = 6.6 Hz, 1H), 4.37 (dd, *J* = 10.3, 5.8 Hz, 1H), 3.40 (dd, *J* = 12.1, 5.8 Hz, 1H), 2.85 (dd, *J* = 12.0, 10.5 Hz, 1H), 1.61 (t, *J* = 6.6 Hz, 3H). <sup>13</sup>C{<sup>1</sup>H} NMR (125 MHz, CDCl<sub>3</sub>)  $\delta$  173.7, 167.2, 159.6, 150.9, 141.3, 140.6, 134.8, 131.8, 130.2, 129.7, 129.2, 128.7, 128.2, 127.8, 126.8, 126.2, 126.1, 124.8, 121.5, 121.1, 111.8, 88.0, 83.0, 73.9, 67.2, 34.2, 21.8. HRMS (ESI) *m/z*: [M + H]<sup>+</sup> Calcd for C<sub>34</sub>H<sub>27</sub>NBrO<sub>5</sub> 608.1067, found 608.1073.

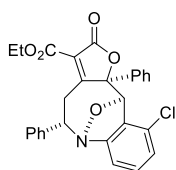

Ethyl 7-chloro-2-oxo-5,11*a*-diphenyl-4,5,11,11*a*-tetrahydro-2*H*-6,11-epoxybenzo[*b*]furo[2,3-*e*]azocine-3-carboxylate (**3ab**). Purified by column chromatography on silica gel (eluting with petroleum ether/ethyl acetate (v/v): 15/1 – 10/1) to afford a white solid in 74% yield (72.0 mg). Mp: 175 – 176 °C. <sup>1</sup>H NMR (500 MHz, CDCl<sub>3</sub>)  $\delta$  7.70 – 7.62 (m, 2H), 7.52 (d, *J* = 7.6 Hz, 2H), 7.49 – 7.39 (m, 5H), 7.33 (t, *J* = 7.4 Hz, 1H), 7.23 (t, *J* = 7.9 Hz, 1H), 7.06 (d, *J* = 8.0 Hz, 1H), 6.78 (d, *J* = 7.8 Hz, 1H), 6.18 (s, 1H), 4.64 (dd, *J* = 10.4, 5.6 Hz, 1H), 4.38 – 4.23 (m, 2H), 3.61 (dd, *J* = 12.1, 5.6 Hz, 1H), 3.03 (dd, *J* = 12.0, 10.6 Hz, 1H), 1.35 (t, *J* = 7.1 Hz, 3H). <sup>13</sup>C{<sup>1</sup>H} NMR (125 MHz, CDCl<sub>3</sub>)  $\delta$  174.3, 166.4, 160.6, 152.6, 141.9, 134.9, 131.6, 130.4, 129.6, 129.2, 128.9, 127.8, 126.1, 126.0, 125.7, 124.8, 121.2, 110.1, 88.9, 83.2, 67.9, 61.8, 34.6, 14.2. HRMS (ESI) *m/z*: [M + H]<sup>+</sup> Calcd for C<sub>28</sub>H<sub>23</sub>ClNO<sub>5</sub> 488.1259, found 488.1262.

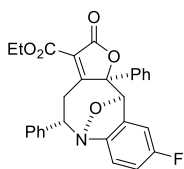

Ethyl 9-fluoro-2-oxo-5,11*a*-diphenyl-4,5,11,11*a*-tetrahydro-2*H*-6,11-epoxybenzo[*b*]furo[2,3-*e*]azocine-3-carboxylate (**3ac**). Purified by column chromatography on silica gel (eluting with petroleum ether/ethyl acetate (v/v): 15/1 – 10/1) to afford a white solid in 88% yield (82.8 mg). Mp: 187 – 188 °C. <sup>1</sup>H NMR (500 MHz, CDCl<sub>3</sub>)  $\delta$  7.72 – 7.59 (m, 2H), 7.51 (d, *J* = 7.2 Hz, 2H), 7.49 – 7.37 (m, 5H), 7.32 (t, *J* = 7.4 Hz, 1H), 7.09 – 6.96 (m, 2H), 6.89 – 6.81 (m, 1H), 5.99 (s, 1H), 4.48 (dd, *J* = 10.5, 5.5 Hz, 1H), 4.37 – 4.23 (m, 2H), 3.54 (dd, *J* = 12.1, 5.5 Hz, 1H), 2.99 (dd, *J* = 12.1, 10.5 Hz, 1H), 1.35 (t, *J* = 7.1 Hz, 3H). <sup>13</sup>C{<sup>1</sup>H} NMR (125 MHz, CDCl<sub>3</sub>)  $\delta$  174.8, 167.2, 160.5, 159.8 (d, <sup>1</sup>*J*<sub>FC</sub> = 244.6 Hz), 147.4, 142.3, 134.8, 129.7, 129.3, 128.9, 128.8 (d, <sup>3</sup>*J*<sub>FC</sub> = 8.9 Hz), 127.8, 126.2, 126.0, 120.9, 117.3 (d, <sup>2</sup>*J*<sub>FC</sub> = 24.2 Hz), 113.0 (d, <sup>3</sup>*J*<sub>FC</sub> = 8.8 Hz), 112.2 (d, <sup>2</sup>*J*<sub>FC</sub> = 25.6 Hz), 87.8, 82.9, 68.7, 61.8, 34.6, 14.2. <sup>19</sup>F NMR (470 MHz, CDCl<sub>3</sub>)  $\delta$  -117.7. HRMS (ESI) *m/z*: [M + H]<sup>+</sup> Calcd for C<sub>28</sub>H<sub>23</sub>FNO<sub>5</sub> 472.1555, found 472.1546.

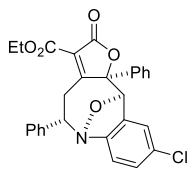

Ethyl 9-chloro-2-oxo-5,11*a*-diphenyl-4,5,11,11*a*-tetrahydro-2*H*-6,11-epoxybenzo[*b*]furo[2,3-*e*]azocine-3-carboxylate (**3ad**). Purified by column chromatography on silica gel (eluting with petroleum ether/ethyl acetate (v/v): 15/1 – 10/1) to afford a white solid in 87% yield (84.6 mg). Mp: 192 – 193 °C. <sup>1</sup>H NMR (500 MHz, CDCl<sub>3</sub>)  $\delta$  7.70 – 7.59 (m, 2H), 7.55 – 7.38 (m, 7H), 7.36 – 7.26 (m, 3H), 6.83 (d, *J* = 8.3 Hz, 1H), 5.99 (s, 1H), 4.51 (dd, *J* = 10.5, 5.5 Hz, 1H), 4.38 – 4.22 (m, 2H), 3.53 (dd, *J* = 12.2, 5.5 Hz, 1H), 2.99 (dd, *J* = 12.1, 10.5 Hz, 1H), 1.35 (t, *J* = 7.1 Hz, 3H). <sup>13</sup>C{<sup>1</sup>H} NMR (125 MHz, CDCl<sub>3</sub>)  $\delta$  174.5, 167.1, 160.5, 149.9, 142.1, 134.8, 130.4, 129.9, 129.7, 129.3, 128.9, 128.8, 127.8, 126.1, 126.0, 124.8, 121.2, 113.0, 87.7, 82.9, 68.7, 61.9, 34.6, 14.2. HRMS (ESI) *m/z*: [M + H]<sup>+</sup> Calcd for C<sub>28</sub>H<sub>23</sub>ClNO<sub>5</sub> 488.1259, found 488.1250.

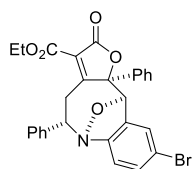

Ethyl 9-bromo-2-oxo-5,11a-diphenyl-4,5,11,11a-tetrahydro-2*H*-6,11-epoxybenzo[*b*]furo[2,3-*e*]azocine-3-carboxylate (**3ae**). Purified by column chromatography on silica gel (eluting with petroleum ether/ethyl acetate (v/v): 15/1 – 10/1) to afford a white solid in 85% yield (91.4 mg). Mp: 214 – 215 °C. <sup>1</sup>H NMR (500 MHz, CDCl<sub>3</sub>) δ 7.69 – 7.59 (m, 2H), 7.55 – 7.37 (m, 9H), 7.36 – 7.29 (m, 1H), 6.78 (d, *J* = 8.3 Hz, 1H), 5.99 (s, 1H), 4.51 (dd, *J* = 10.4, 5.5 Hz, 1H), 4.38 – 4.23 (m, 2H), 3.53 (dd, *J* = 12.2, 5.5 Hz, 1H), 2.99 (dd, *J* = 12.1, 10.5 Hz, 1H), 1.35 (t, *J* = 7.1 Hz, 3H). <sup>13</sup>C{<sup>1</sup>H} NMR (125 MHz, CDCl<sub>3</sub>) δ 174.4, 167.0, 160.5, 150.4, 142.1, 134.8, 133.2, 129.7, 129.3, 129.1, 128.9, 127.8, 127.7, 126.1, 126.0, 121.2, 117.1, 113.4, 87.7, 82.9, 68.6, 61.9, 34.6, 14.2. HRMS (ESI) *m/z*: [M + Na]<sup>+</sup> Calcd for C<sub>28</sub>H<sub>22</sub>BrNO<sub>5</sub>Na 554.0574, found 554.0579.

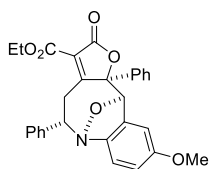

Ethyl 9-methoxy-2-oxo-5,11a-diphenyl-4,5,11,11a-tetrahydro-2*H*-6,11-epoxybenzo[*b*]furo[2,3-*e*]azocine-3-carboxylate (**3af**). Purified by column chromatography on silica gel (eluting with petroleum ether/ethyl acetate (v/v): 15/1 – 10/1) to afford a white solid in 80% yield (77.3 mg). Mp: 179 – 180 °C. <sup>1</sup>H NMR (500 MHz, CDCl<sub>3</sub>) δ 7.66 (d, *J* = 7.5 Hz, 2H), 7.52 (d, *J* = 7.5 Hz, 2H), 7.50 – 7.36 (m, 5H), 7.31 (t, *J* = 7.4 Hz, 1H), 6.90 – 6.76 (m, 3H), 5.97 (s, 1H), 4.43 (dd, *J* = 10.4, 5.5 Hz, 1H), 4.38 – 4.20 (m, 2H), 3.79 (s, 3H), 3.50 (dd, *J* = 12.1, 5.6 Hz, 1H), 2.98 (dd, *J* = 11.7, 10.8 Hz, 1H), 1.35 (t, *J* = 7.1 Hz, 3H). <sup>13</sup>C{<sup>1</sup>H} NMR (125 MHz, CDCl<sub>3</sub>) δ 175.0, 167.7, 160.5, 157.1, 144.5, 142.7, 135.0, 129.6, 129.2, 128.8, 128.2, 127.6, 126.2, 126.1, 120.3, 117.1, 112.9, 109.2, 88.1, 83.0, 68.5, 61.7, 55.9, 34.6, 14.2. HRMS (ESI) *m/z*: [M + H]<sup>+</sup> Calcd for C<sub>29</sub>H<sub>26</sub>NO<sub>6</sub> 484.1755, found 484.1761.

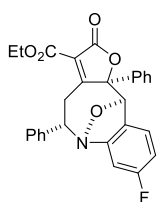

Ethyl 8-fluoro-2-oxo-5,11a-diphenyl-4,5,11,11a-tetrahydro-2*H*-6,11-epoxybenzo[*b*]furo[2,3-*e*]azocine-3-carboxylate (**3ag**). Purified by column chromatography on silica gel (eluting with petroleum ether/ethyl acetate (v/v): 15/1 – 10/1) to afford a white solid in 89% yield (83.8 mg). Mp: 196 – 197 °C. <sup>1</sup>H NMR (500 MHz, CDCl<sub>3</sub>) δ 7.70 – 7.59 (m, 2H), 7.51 (d, *J* = 7.2 Hz, 2H), 7.50 – 7.38 (m, 5H), 7.33 (t, *J* = 7.4 Hz, 1H), 7.30 – 7.23 (m, 1H), 6.85 – 6.75 (m, 1H), 6.62 (dd, *J* = 8.5, 2.2 Hz, 1H), 5.99 (s, 1H), 4.52 (dd, *J* = 10.4, 5.6 Hz, 1H), 4.39 – 4.23 (m, 2H), 3.56 (dd, *J* = 12.1, 5.6 Hz, 1H), 3.00 (dd, *J* = 12.1, 10.5 Hz, 1H), 1.36 (t, *J* = 7.1 Hz, 3H). <sup>13</sup>C{<sup>1</sup>H} NMR (125 MHz, CDCl<sub>3</sub>) δ 174.6, 167.3, 164.1 (d, <sup>1</sup>*J*<sub>FC</sub> = 248.3 Hz), 160.4, 153.1 (d, <sup>3</sup>*J*<sub>FC</sub> = 11.3 Hz), 142.0, 134.8, 129.7, 129.3, 128.9, 127.8, 126.2, 126.0, 125.7 (d, <sup>3</sup>*J*<sub>FC</sub> = 10.1 Hz), 122.4, 121.2, 111.7 (d, <sup>2</sup>*J*<sub>FC</sub> = 23.3 Hz), 100.2 (d, <sup>2</sup>*J*<sub>FC</sub> = 26.9 Hz), 88.0, 82.8, 68.2, 61.8, 34.6, 14.2. <sup>19</sup>F NMR (470 MHz, CDCl<sub>3</sub>) δ –110.1. HRMS (ESI) *m/z*: [M + H]<sup>+</sup> Calcd for C<sub>28</sub>H<sub>23</sub>FNO<sub>5</sub> 472.1555, found 472.1554.

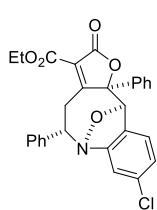

Ethyl 8-chloro-2-oxo-5,11a-diphenyl-4,5,11,11a-tetrahydro-2*H*-6,11-epoxybenzo[*b*]furo[2,3-*e*]azocine-3-carboxylate (**3ah**). Purified by column chromatography on silica gel (eluting with petroleum ether/ethyl acetate (v/v): 15/1 – 10/1) to afford a white solid in 87% yield (84.7 mg). Mp: 193 – 194 °C. <sup>1</sup>H NMR (500 MHz, CDCl<sub>3</sub>) δ 7.69 – 7.59 (m, 2H), 7.56 – 7.36 (m, 7H), 7.36 – 7.30 (m, 1H), 7.24 (d, *J* = 8.1 Hz, 1H), 7.07 (dd, *J* = 8.0, 1.8 Hz, 1H), 6.90 (d, *J* = 1.8 Hz, 1H), 6.00 (s, 1H), 4.50 (dd, *J* = 10.5, 5.5 Hz, 1H), 4.38 – 4.25 (m, 2H), 3.56 (dd, *J* = 12.2, 5.6 Hz, 1H), 3.00 (dd, *J* = 12.1, 10.5 Hz, 1H), 1.36 (t, *J* = 7.1 Hz, 3H). <sup>13</sup>C{<sup>1</sup>H} NMR (125 MHz, CDCl<sub>3</sub>) δ 174.6, 167.3, 160.4, 152.7, 141.9, 136.2, 134.8, 129.7, 129.3, 128.9, 127.8, 126.2, 126.0, 125.6, 125.4, 124.9, 121.2, 112.6, 87.9, 82.9, 68.5, 61.9, 34.6, 14.2. HRMS (ESI) *m/z*: [M + H]<sup>+</sup> Calcd for C<sub>28</sub>H<sub>23</sub>ClNO<sub>5</sub> 488.1259, found 488.1260.

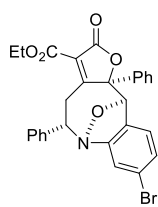

Ethyl 8-bromo-2-oxo-5,11a-diphenyl-4,5,11,11a-tetrahydro-2*H*-6,11-epoxybenzo[*b*]furo[2,3-*e*]azocine-3-carboxylate (**3ai**). Purified by column chromatography on silica gel (eluting with petroleum ether/ethyl acetate (v/v): 15/1 – 10/1) to afford a white solid in 92% yield (97.7 mg). Mp: 200 – 201 °C. <sup>1</sup>H NMR (500 MHz, CDCl<sub>3</sub>) δ 7.63 (d, *J* = 7.7 Hz, 2H), 7.55 – 7.38 (m, 7H), 7.32 (t, *J* = 7.4 Hz, 1H), 7.25 – 7.14 (m, 2H), 7.06 (s, 1H), 5.98 (s, 1H), 4.50 (dd, *J* = 10.4, 5.5 Hz, 1H), 4.39 – 4.24 (m, 2H), 3.57 (dd, *J* = 12.1, 5.5 Hz, 1H), 3.05 – 2.94 (m, 1H), 1.37 (t, *J* = 7.1 Hz, 3H). <sup>13</sup>C NMR (125 MHz, CDCl<sub>3</sub>) δ 174.5, 167.3, 160.4, 152.8, 141.9, 134.7, 129.7, 129.3, 128.9, 127.8, 127.7, 126.2, 126.0, 125.8, 123.9, 121.2, 115.4, 87.8, 82.9, 68.5, 61.9, 34.6, 14.2. HRMS (ESI) *m/z*: [M + H]<sup>+</sup> Calcd for C<sub>28</sub>H<sub>23</sub>BrNO<sub>5</sub> 532.0754, found 532.0749.

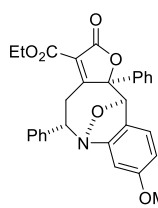

Ethyl 8-methoxy-2-oxo-5,11a-diphenyl-4,5,11,11a-tetrahydro-2*H*-6,11-epoxybenzo[*b*]furo[2,3-*e*]azocine-3-carboxylate (**3aj**). Purified by column chromatography on silica gel (eluting with petroleum ether/ethyl acetate (v/v): 15/1 – 10/1) to afford a white solid in 84% yield (81.1 mg). Mp: 190 – 191 °C. <sup>1</sup>H NMR (500 MHz, CDCl<sub>3</sub>) δ 7.65 (d, *J* = 7.3 Hz, 2H), 7.53 (d, *J* = 7.5 Hz, 2H), 7.49 – 7.36 (m, 5H), 7.32 (t, *J* = 7.3 Hz, 1H), 7.21 (d, *J* = 8.3 Hz, 1H), 6.68 – 6.56 (m, 1H), 6.43 (s, 1H), 5.95 (s, 1H), 4.52 (dd, *J* = 10.3, 5.5 Hz, 1H), 4.39 – 4.20 (m, 2H), 3.78 (s, 3H), 3.54 (dd, *J* = 12.0, 5.5 Hz, 1H), 3.06 – 2.93 (m, 1H), 1.35 (t, *J* = 7.1 Hz, 3H). <sup>13</sup>C{<sup>1</sup>H} NMR (126 MHz, CDCl<sub>3</sub>) δ 175.1, 167.6, 161.6, 160.5, 153.0, 142.5, 135.1, 129.5, 129.2, 128.8, 127.7, 126.2, 126.1, 125.1, 120.9, 118.8, 110.0, 98.4, 88.3, 82.9, 68.2, 61.6, 55.6, 34.6, 14.2. HRMS (ESI) *m/z*: [M + H]<sup>+</sup> Calcd for C<sub>29</sub>H<sub>26</sub>NO<sub>6</sub> 484.1755, found 484.1749.

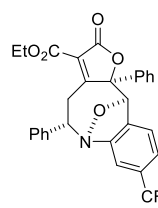

Ethyl 2-oxo-5,11a-diphenyl-8-(trifluoromethyl)-4,5,11,11a-tetrahydro-2*H*-6,11-epoxybenzo[*b*]furo[2,3-*e*]azocine-3-carboxylate (**3ak**). Purified by column chromatography on silica gel (eluting with petroleum ether/ethyl acetate (v/v): 15/1 – 10/1) to afford a white solid in 86% yield (89.6 mg). Mp: 186 – 187 °C. <sup>1</sup>H NMR (500 MHz, CDCl<sub>3</sub>) δ 7.64 (d, *J* = 7.0 Hz, 2H), 7.59 – 7.29 (m, 10H), 7.13 (s, 1H), 6.08 (s, 1H), 4.56 (dd, *J* = 10.3, 5.5 Hz, 1H), 4.38 – 4.19 (m, 2H), 3.58 (dd, *J* = 12.2, 5.6 Hz, 1H), 3.09 – 2.94 (m, 1H), 1.32 (t, *J* = 7.1 Hz, 3H). <sup>13</sup>C{<sup>1</sup>H} NMR (125 MHz, CDCl<sub>3</sub>) δ 174.2, 167.1, 160.3, 152.0, 141.7, 134.5, 132.9 (q, <sup>2</sup>*J*<sub>FC</sub> = 32.7 Hz), 130.9, 129.8, 129.4, 129.0, 127.9, 126.1, 126.0, 125.2, 123.6 (q, <sup>1</sup>*J*<sub>FC</sub> = 272.5 Hz), 121.8 (q, <sup>3</sup>*J*<sub>FC</sub> = 3.5 Hz), 121.3, 109.1, 87.6, 82.8, 68.5, 61.9, 34.6, 14.1. <sup>19</sup>F NMR (470 MHz, CDCl<sub>3</sub>) δ –62.5. HRMS (ESI) *m/z*: [M + H]<sup>+</sup> Calcd for C<sub>29</sub>H<sub>23</sub>F<sub>3</sub>NO<sub>5</sub> 522.1523, found 522.1525.

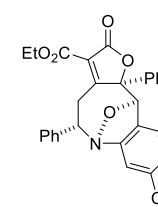

3-Ethyl 8-methyl 2-oxo-5,11a-diphenyl-4,5,11,11a-tetrahydro-2*H*-6,11-epoxybenzo[*b*]furo[2,3-*e*]azocine-3,8-dicarboxylate (**3al**). Purified by column chromatography on silica gel (eluting with petroleum ether/ethyl acetate (v/v): 15/1 – 10/1) to afford a white solid in 96% yield (98.1 mg). Mp: 213 – 214 °C. <sup>1</sup>H NMR (500 MHz, CDCl<sub>3</sub>) δ 7.84 – 7.74 (m, 1H), 7.69 – 7.61 (m, 2H), 7.60 – 7.51 (m, 3H), 7.51 – 7.36 (m, 6H), 7.32 (t, *J* = 7.4 Hz, 1H), 6.06 (s, 1H), 4.56 (dd, *J* = 10.5, 5.5 Hz, 1H), 4.35 – 4.19 (m, 2H), 3.91 (s, 3H), 3.57 (dd, *J* = 12.2, 5.5 Hz, 1H), 3.02 (dd, *J* = 12.1, 10.6 Hz, 1H), 1.32 (t, *J* = 7.1 Hz, 3H). <sup>13</sup>C{<sup>1</sup>H} NMR (125 MHz, CDCl<sub>3</sub>) δ 174.5, 167.1, 166.0, 160.2, 151.7, 142.0, 134.7, 132.4, 131.8, 129.7, 129.3, 128.8, 127.8, 126.3, 126.1, 126.0, 124.6, 120.9, 113.0, 87.7, 82.8, 68.6, 61.8, 52.4, 34.5, 14.1. HRMS (ESI) *m/z*: [M + H]<sup>+</sup> Calcd for C<sub>30</sub>H<sub>26</sub>NO<sub>7</sub> 512.1704, found 512.1708.

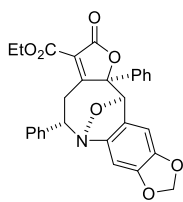

Ethyl 2-oxo-5,12a-diphenyl-4,5,12,12a-tetrahydro-2*H*-6,12-epoxy[1,3]dioxolo[4',5':4,5]benzo[1,2-*b*]furo[2,3-*e*]azocine-3-carboxylate (**3an**). Purified by column chromatography on silica gel (eluting with petroleum ether/ethyl acetate (v/v): 15/1 – 10/1) to afford a white solid in 85% yield (82.8 mg). Mp: 163 – 164 °C. <sup>1</sup>H NMR (500 MHz, CDCl<sub>3</sub>) δ 7.69 – 7.59 (m, 2H), 7.54 – 7.38 (m, 7H), 7.31 (t, *J* = 7.4 Hz, 1H), 6.74 (s, 1H), 6.40 (s, 1H), 6.00 (d, *J* = 1.2 Hz, 1H), 5.97 (d, *J* = 1.2 Hz, 1H), 5.88 (s, 1H), 4.41 (dd, *J* = 10.5, 5.4 Hz, 1H), 4.38 – 4.25 (m, 2H), 3.52 (dd, *J* = 12.1, 5.4 Hz, 1H), 3.00 (dd, *J* = 11.9, 10.7 Hz, 1H), 1.37 (t, *J* = 7.1 Hz, 3H). <sup>13</sup>C{<sup>1</sup>H} NMR (125 MHz, CDCl<sub>3</sub>) δ 175.3, 167.7, 160.6, 149.6, 145.8, 145.0, 142.5, 135.0, 129.6, 129.2, 128.8, 127.6, 126.2, 126.0, 120.6, 118.3, 104.7, 102.1, 94.5, 88.4, 83.2, 68.0, 61.7, 34.6, 14.2. HRMS (ESI) *m/z*: [M + H]<sup>+</sup> Calcd for C<sub>29</sub>H<sub>24</sub>NO<sub>7</sub> 498.1547, found 498.1556.

### 5.3 Characterization data of transformation products

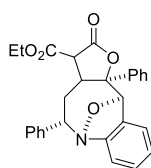

Ethyl 2-oxo-5,11a-diphenyl-3,3a,4,5,11,11a-hexahydro-2*H*-6,11-epoxybenzo[*b*]furo[2,3-*e*]azocine-3-carboxylate (**4**). Purified by column chromatography on silica gel (eluting with petroleum ether/ethyl acetate (v/v): 15/1 – 10/1) to afford a white solid in 80% yield (332.2 mg). Mp: 123 – 124 °C. <sup>1</sup>H NMR (500 MHz, CDCl<sub>3</sub>) δ 7.71 – 7.65 (m, 2H), 7.59 (d, *J* = 7.5 Hz, 2H), 7.49 – 7.32 (m, 8H), 7.24 – 7.18 (m, 1H), 7.04 (d, *J* = 7.7 Hz, 1H), 5.65 (s, 1H), 4.53 (dd, *J* = 9.3, 4.0 Hz, 1H), 4.08 – 3.95 (m, 2H), 3.30 – 3.20 (m, 1H), 2.62 – 2.52 (m, 1H), 2.50 (d, *J* = 10.3 Hz, 1H), 2.06 – 1.93 (m, 1H), 1.13 (t, *J* = 7.1 Hz, 3H). <sup>13</sup>C{<sup>1</sup>H} NMR (125 MHz, CDCl<sub>3</sub>) δ 170.5, 166.5, 151.6, 142.8, 142.0, 130.4, 130.1, 128.9, 128.8, 128.5, 127.5, 126.4, 125.6, 125.3, 124.7, 112.5, 88.1, 87.4, 73.4, 62.2, 51.2, 49.8, 32.4, 13.9. HRMS (ESI) *m/z*: [M + H]<sup>+</sup> Calcd for C<sub>28</sub>H<sub>26</sub>NO<sub>5</sub> 456.1805, found 456.1811.

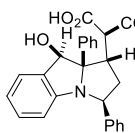

3-Ethoxy-2-(9-hydroxy-3,9a-diphenyl-2,3,9,9a-tetrahydro-1*H*-pyrrolo[1,2-*a*]indol-1-yl)-3-oxopropanoic acid (**5**). Purified by column chromatography on silica gel (eluting with petroleum ether/ethyl acetate (v/v): 5/1 – 2/1) to afford a white solid in 80% yield (36.6 mg in MeOH), 25% yield (11.5 mg in DCM). Mp: 139 – 140 °C. <sup>1</sup>H NMR (500 MHz, CDCl<sub>3</sub>) δ 7.86 – 7.79 (m, 2H), 7.47 (d, *J* = 7.4 Hz, 2H), 7.43 – 7.35 (m, 4H), 7.34 – 7.27 (m, 3H), 7.18 (t, *J* = 7.7 Hz, 1H), 6.93 – 6.86 (m, 1H), 6.56 (d, *J* = 7.9 Hz, 1H), 5.66 (s, 1H), 4.57 (dd, *J* = 11.6, 5.9 Hz, 1H), 4.30 – 4.16 (m, 2H), 3.73 – 3.64 (m, 1H), 3.56 (d, *J* = 11.1 Hz, 1H), 2.22 – 2.14 (m, 1H), 2.13 – 2.04 (m, 1H), 1.28 (t, *J* = 7.1 Hz, 3H). <sup>13</sup>C{<sup>1</sup>H} NMR (125 MHz, CDCl<sub>3</sub>) δ 171.0, 168.3, 153.6, 143.3, 141.0, 130.8, 130.7, 128.7, 128.4, 128.0, 127.7, 127.3, 126.7, 126.2, 121.1, 110.7, 84.4, 75.7, 66.2, 62.1, 51.9, 47.2, 40.4, 14.2. HRMS (ESI) *m/z*: [M + H]<sup>+</sup> Calcd for C<sub>28</sub>H<sub>28</sub>NO<sub>5</sub> 458.1962, found 458.1969.

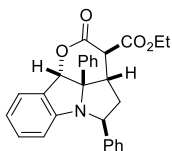

Ethyl 2-oxo-3a1,5-diphenyl-3,3a,3a1,4,5,10b-hexahydro-2*H*-benzo[*b*]pyrano[4,3,2-*gh*]pyrrolizine-3-carboxylate (**6**). Purified by column chromatography on silica gel (eluting with petroleum ether/ethyl acetate (v/v): 10/1 – 8/1) to afford a white solid in 15% yield (6.7 mg in MeOH), 50% yield (21.9 mg in DCM). Mp: 181 – 182 °C. <sup>1</sup>H NMR (500 MHz, CDCl<sub>3</sub>) δ 7.64 (d, *J* = 7.5 Hz, 2H), 7.52 – 7.27 (m, 10H), 6.98 (t, *J* = 7.5 Hz, 1H), 6.77 (d, *J* = 8.2 Hz, 1H), 5.75 (s, 1H), 4.67 (dd, *J* = 10.9, 6.9 Hz, 1H), 4.40 – 4.23 (m, 2H), 3.48 – 3.36 (m, 1H), 3.02 (d, *J* = 13.1 Hz, 1H), 2.46 – 2.36 (m, 1H), 2.32 – 2.19 (m, 1H), 1.33 (t, *J* = 7.2 Hz, 3H). <sup>13</sup>C{<sup>1</sup>H} NMR (125 MHz, CDCl<sub>3</sub>) δ 168.4, 167.5, 154.6, 144.8, 142.5, 131.7, 129.0, 128.8, 127.9, 127.4, 126.5, 125.8, 125.6, 125.1, 121.9, 111.1, 87.5, 78.9, 68.2, 62.1, 48.9, 46.6, 39.1, 14.2. HRMS (ESI) *m/z*: [M + H]<sup>+</sup> Calcd for C<sub>28</sub>H<sub>26</sub>NO<sub>4</sub> 440.1856, found 440.1861.



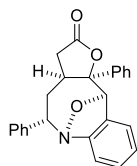

5,11a-Diphenyl-3,3a,4,5,11,11a-hexahydro-2H-6,11-epoxybenzo[*b*]furo[2,3-*e*]azocin-2-one (**7**).

Purified by column chromatography on silica gel (eluting with petroleum ether/ethyl acetate (v/v): 10/1) to afford a white solid in 89% yield (251.5 mg). Mp: 228 – 229 °C. <sup>1</sup>H NMR (500 MHz, CDCl<sub>3</sub>) δ 7.75 (d, *J* = 7.7 Hz, 2H), 7.59 – 7.27 (m, 10H), 7.26 – 7.18 (m, 1H), 7.05 (d, *J* = 7.8 Hz, 1H), 5.44 (s, 1H), 4.57 (s, 1H), 2.99 – 2.85 (m, 1H), 2.51 – 2.39 (m, 1H), 2.15 – 1.99 (m, 1H), 1.94 – 1.73 (m, 2H). <sup>13</sup>C{<sup>1</sup>H} NMR (125 MHz, CDCl<sub>3</sub>) δ 175.8, 149.8, 144.2, 139.8, 132.8, 129.4, 128.9, 128.7, 128.1, 127.2, 127.0, 125.6, 125.5, 124.0, 113.3, 89.8, 87.3, 72.5, 43.6, 36.2, 32.2. HRMS (ESI) *m/z*: [M + H]<sup>+</sup> Calcd for C<sub>25</sub>H<sub>22</sub>NO<sub>3</sub> 384.1594, found 384.1589.

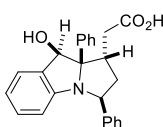

2-(9-Hydroxy-3,9a-diphenyl-2,3,9,9a-tetrahydro-1H-pyrrolo[1,2-*a*]indol-1-yl)acetic acid (**8**).

Purified by column chromatography on silica gel (eluting with petroleum ether/ethyl acetate (v/v): 5/1 – 2/1) to afford a white solid in 85% yield (32.7 mg in MeOH), 35% yield (13.5 mg in DCM). Mp: 121 – 122 °C. <sup>1</sup>H NMR (500 MHz, CDCl<sub>3</sub>) δ 7.63 (d, *J* = 7.3 Hz, 2H), 7.47 (d, *J* = 7.7 Hz, 2H), 7.40 – 7.17 (m, 8H), 6.89 (t, *J* = 7.3 Hz, 1H), 6.67 (d, *J* = 7.9 Hz, 1H), 5.55 (s, 1H), 4.52 (dd, *J* = 10.7, 6.8 Hz, 1H), 3.35 – 3.22 (m, 1H), 2.66 (dd, *J* = 16.4, 5.6 Hz, 1H), 2.46 – 2.36 (m, 1H), 2.16 (dd, *J* = 16.4, 9.0 Hz, 1H), 2.11 – 2.01 (m, 1H). <sup>13</sup>C{<sup>1</sup>H} NMR (125 MHz, CDCl<sub>3</sub>) δ 177.6, 155.2, 143.5, 141.2, 131.0, 130.7, 128.5, 128.3, 127.7, 127.4, 127.0, 126.5, 125.7, 121.0, 110.6, 84.5, 75.5, 66.3, 44.3, 40.8, 34.3. HRMS (ESI) *m/z*: [M + H]<sup>+</sup> Calcd for C<sub>25</sub>H<sub>24</sub>NO<sub>3</sub> 386.1751, found 386.1750.

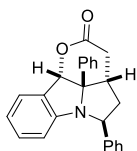

3a1,5-Diphenyl-3,3a,3a1,4,5,10b-hexahydro-2H-benzo[*b*]pyrano[4,3,2-*gh*]pyrrolizin-2-one (**9**).

Purified by column chromatography on silica gel (eluting with petroleum ether/ethyl acetate (v/v): 10/1 – 6/1) to afford a white solid in 8% yield (3 mg in MeOH), 50% yield (18.5 mg in DCM). Mp: 158 – 159 °C. <sup>1</sup>H NMR (500 MHz, CDCl<sub>3</sub>) δ 7.62 (d, *J* = 8.2 Hz, 2H), 7.48 (d, *J* = 7.6 Hz, 2H), 7.45 – 7.39 (m, 2H), 7.39 – 7.22 (m, 6H), 6.94 (t, *J* = 7.4 Hz, 1H), 6.75 (d, *J* = 8.0 Hz, 1H), 5.74 (s, 1H), 4.68 (dd, *J* = 10.7, 7.0 Hz, 1H), 3.12 – 2.99 (m, 1H), 2.57 (dd, *J* = 15.7, 4.2 Hz, 1H), 2.48 (dd, *J* = 13.2, 7.0 Hz, 1H), 2.29 – 2.16 (m, 1H), 2.03 (dd, *J* = 15.7, 13.8 Hz, 1H). <sup>13</sup>C{<sup>1</sup>H} NMR (125 MHz, CDCl<sub>3</sub>) δ 171.8, 155.2, 145.4, 143.0, 131.3, 128.81, 128.75, 127.6, 127.2, 126.5, 126.0, 125.7, 125.6, 121.6, 110.8, 87.6, 79.6, 68.6, 43.9, 40.0, 32.9. HRMS (ESI) *m/z*: [M + H]<sup>+</sup> Calcd for C<sub>25</sub>H<sub>22</sub>NO<sub>2</sub> 368.1645, found 368.1641.

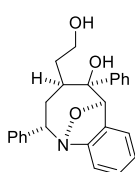

4-(2-Hydroxyethyl)-2,5-diphenyl-3,4,5,6-tetrahydro-2H-1,6-epoxybenzo[*b*]azocin-5-ol (**10**).

Purified by column chromatography on silica gel (eluting with petroleum ether/ethyl acetate (v/v): 5/1 – 2/1) to afford a white solid in 94% yield (120 mg). Mp: 178 – 179 °C. <sup>1</sup>H NMR (500 MHz, CDCl<sub>3</sub>) δ 7.75 (d, *J* = 7.2 Hz, 2H), 7.59 – 7.41 (m, 5H), 7.40 – 7.30 (m, 4H), 7.25 – 7.16 (m, 2H), 7.06 (d, *J* = 7.8 Hz, 1H), 5.33 (s, 1H), 4.51 (s, 1H), 3.38 – 3.24 (m, 1H), 3.21 – 3.08 (m, 1H), 3.03 – 2.80 (m, 1H), 2.57 – 2.43 (m, 1H), 2.05 – 1.91 (m, 1H), 1.80 – 1.48 (m, 2H), 1.24 – 1.15 (m, 1H), 1.14 – 1.03 (m, 1H). <sup>13</sup>C{<sup>1</sup>H} NMR (125 MHz, CDCl<sub>3</sub>) δ 149.6, 148.2, 140.7, 134.3, 128.8, 128.5, 128.4, 127.1, 126.9, 126.8, 124.9, 124.8, 124.7, 113.6, 90.0, 79.6, 72.1, 59.9, 40.8, 33.0, 29.5. HRMS (ESI) *m/z*: [M + H]<sup>+</sup> Calcd for C<sub>25</sub>H<sub>26</sub>NO<sub>3</sub> 388.1907, found 388.1900.

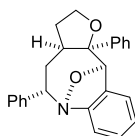

5,11a-Diphenyl-3,3a,4,5,11,11a-hexahydro-2H-6,11-epoxybenzo[*b*]furo[2,3-*e*]azocine (**11**).

Purified by column chromatography on silica gel (eluting with petroleum ether/ethyl acetate (v/v): 10/1 – 8/1) to afford a white solid in 90% yield (33.1 mg). Mp: 177 – 178 °C. <sup>1</sup>H NMR (500 MHz, CDCl<sub>3</sub>) δ 7.84 – 7.73 (m, 2H), 7.57 – 7.44 (m, 5H), 7.39 – 7.28 (m, 4H), 7.25 – 7.16 (m, 2H), 7.03 (d, *J* = 7.8 Hz, 1H), 5.26 (s, 1H), 4.57 – 4.46 (m, 1H), 4.12 – 4.01 (m, 1H), 3.93 – 3.81 (m, 1H), 2.78 – 2.66

(m, 1H), 2.16 – 2.03 (m, 1H), 1.93 – 1.83 (m, 1H), 1.82 – 1.71 (m, 1H), 1.24 – 1.12 (m, 1H).  $^{13}\text{C}\{^1\text{H}\}$  NMR (125 MHz,  $\text{CDCl}_3$ )  $\delta$  150.2, 148.6, 141.1, 135.0, 128.47, 128.45, 128.3, 127.2, 126.9, 126.8, 125.4, 124.7, 124.6, 113.1, 90.2, 88.8, 73.0, 68.7, 47.0, 32.2. HRMS (ESI)  $m/z$ :  $[\text{M} + \text{H}]^+$  Calcd for  $\text{C}_{25}\text{H}_{24}\text{NO}_2$  370.1802, found 370.1808.

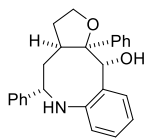

5,11a-Diphenyl-2,3,3a,4,5,6,11,11a-octahydrobenzo[*b*]furo[2,3-*e*]azocin-11-ol (**12**). Purified by column chromatography on silica gel (eluting with petroleum ether/ethyl acetate (v/v): 8/1 – 6/1) to afford a white solid in 86% yield (90 mg). Mp: 176 – 177 °C.  $^1\text{H}$  NMR (500 MHz,  $\text{CDCl}_3$ )  $\delta$  8.80 (brs, 1H), 7.87 – 7.71 (m, 1H), 7.65 (d,  $J = 7.6$  Hz, 2H), 7.61 – 7.50 (m, 3H), 7.50 – 7.28 (m, 7H), 7.07 (d,  $J = 7.5$  Hz, 1H), 4.62 (brs, 1H), 4.46 (brs, 1H), 3.88 – 3.59 (m, 3H), 2.84 – 2.69 (m, 1H), 2.26 – 2.11 (m, 1H), 1.61 – 1.49 (m, 1H), 1.20 – 1.11 (m, 1H), 0.95 – 0.78 (m, 1H).  $^{13}\text{C}$  NMR (125 MHz,  $\text{CDCl}_3$ )  $\delta$  145.8, 143.6, 141.8, 137.5, 131.0, 128.7, 128.3, 128.0, 127.4, 126.8, 126.6, 126.2, 125.5, 124.8, 91.1, 80.2, 65.2, 63.9, 37.0, 35.4, 34.3. HRMS (ESI)  $m/z$ :  $[\text{M} + \text{H}]^+$  Calcd for  $\text{C}_{25}\text{H}_{26}\text{NO}_2$  372.1958, found 372.1967.

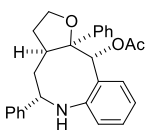

5,11a-diphenyl-2,3,3a,4,5,6,11,11a-octahydrobenzo[*b*]furo[2,3-*e*]azocin-11-yl acetate (**13**). Purified by column chromatography on silica gel (eluting with petroleum ether/ethyl acetate (v/v): 6/1) to afford a white solid in 76% yield (15.9 mg). Mp: 182 – 183 °C.  $^1\text{H}$  NMR (500 MHz,  $\text{CDCl}_3$ )  $\delta$  7.52 – 7.38 (m, 4H), 7.38 – 7.30 (m, 1H), 7.24 – 7.04 (m, 6H), 7.04 – 6.95 (m, 1H), 6.67 – 6.39 (m, 3H), 5.17 – 4.98 (m, 1H), 4.09 – 3.86 (m, 2H), 3.85 – 3.73 (m, 1H), 3.26 – 3.09 (m, 1H), 2.62 – 2.51 (m, 1H), 2.14 (s, 3H), 2.09 – 1.96 (m, 1H), 1.92 – 1.80 (m, 1H), 1.80 – 1.69 (m, 1H).  $^{13}\text{C}$  NMR (125 MHz,  $\text{CDCl}_3$ )  $\delta$  169.9, 145.7, 144.8, 140.4, 129.0, 128.8, 128.2, 127.6, 127.2, 126.9, 126.8, 126.7, 119.5, 119.2, 90.2, 74.3, 64.5, 58.4, 42.7, 39.4, 32.4, 21.2. HRMS (ESI)  $m/z$ :  $[\text{M} + \text{H}]^+$  Calcd for  $\text{C}_{27}\text{H}_{28}\text{NO}_3$  414.2064, found 414.2072.

## 6. Copies of NMR spectra for compounds

### 6.1 Copies of NMR spectra for compounds 15u, 16u, 1u and 1u'

#### Compound 15u

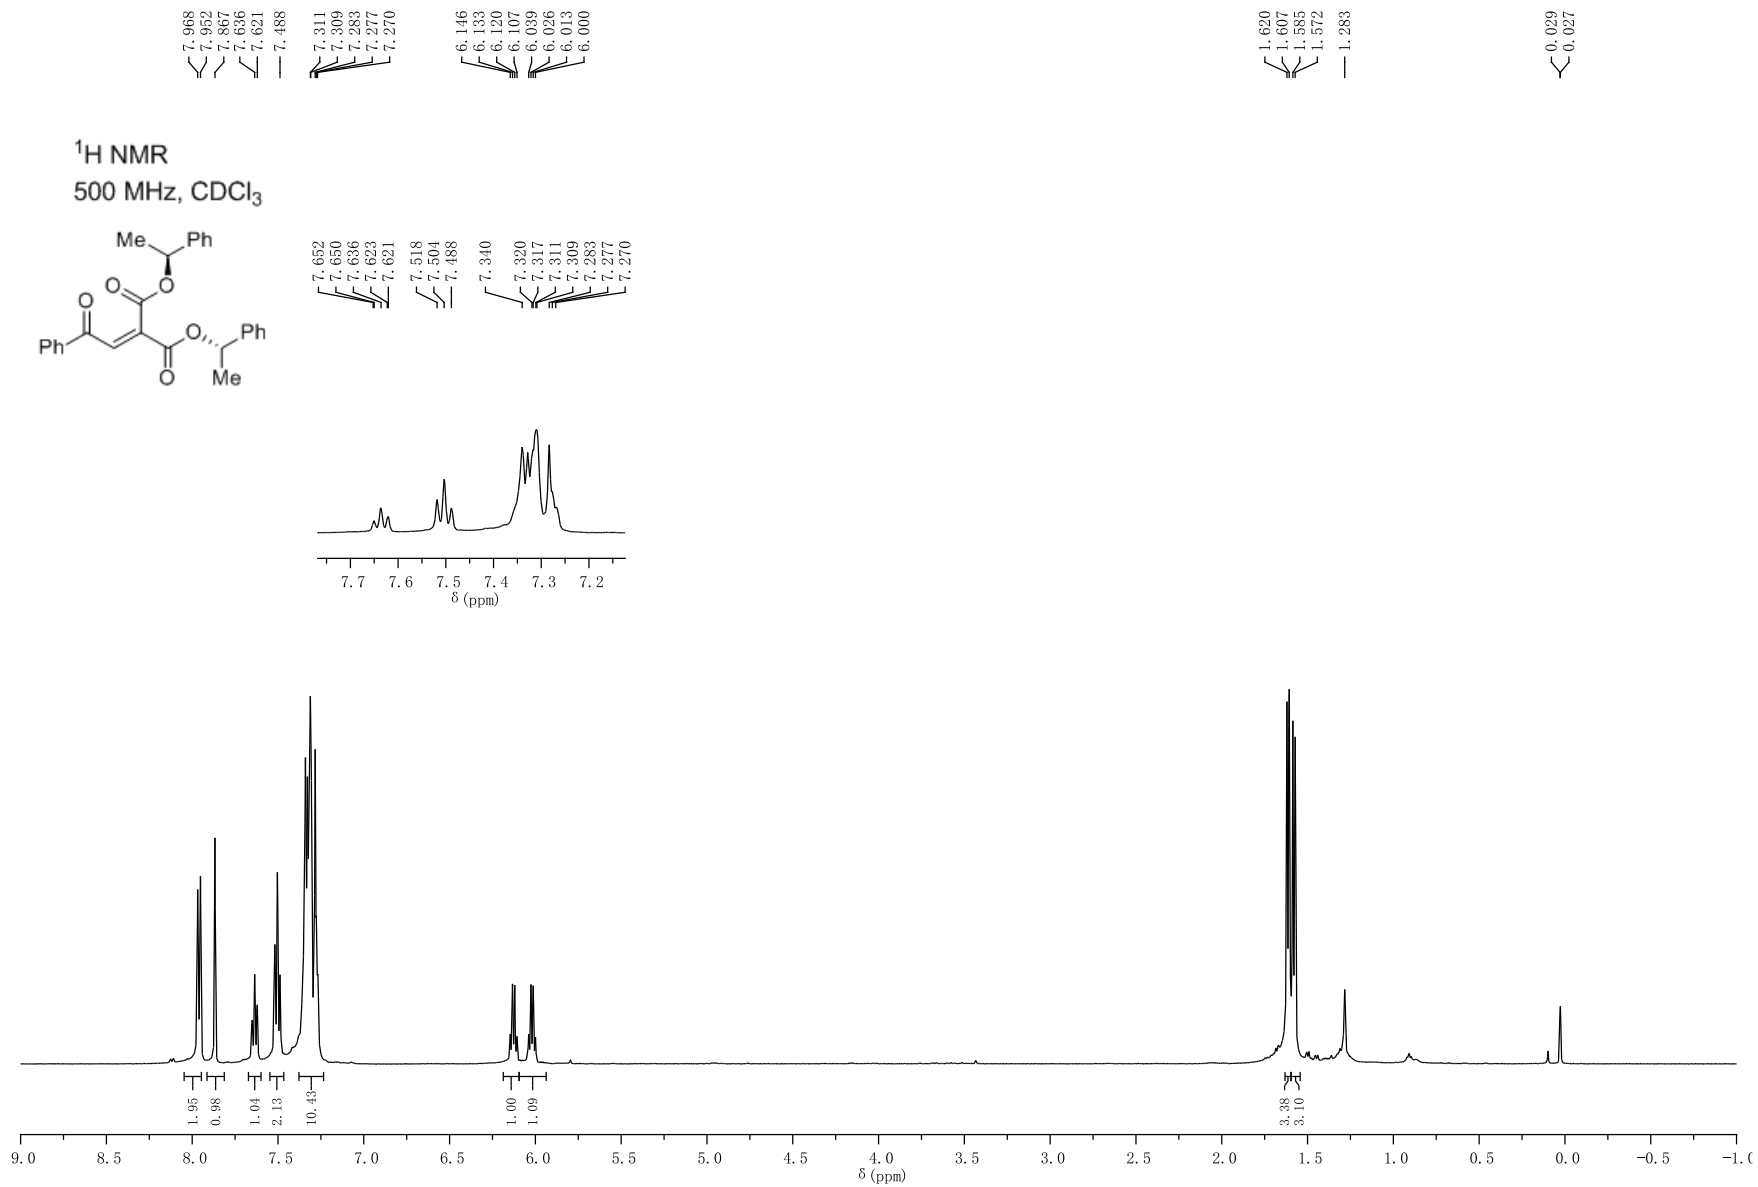

# Compound 15u

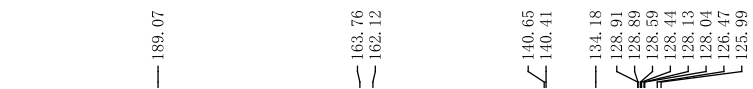

$^{13}\text{C}\{^1\text{H}\}$  NMR  
125 MHz,  $\text{CDCl}_3$

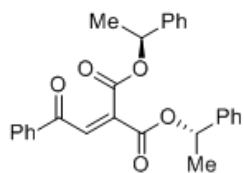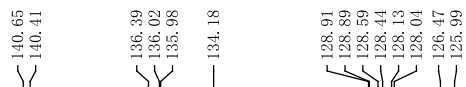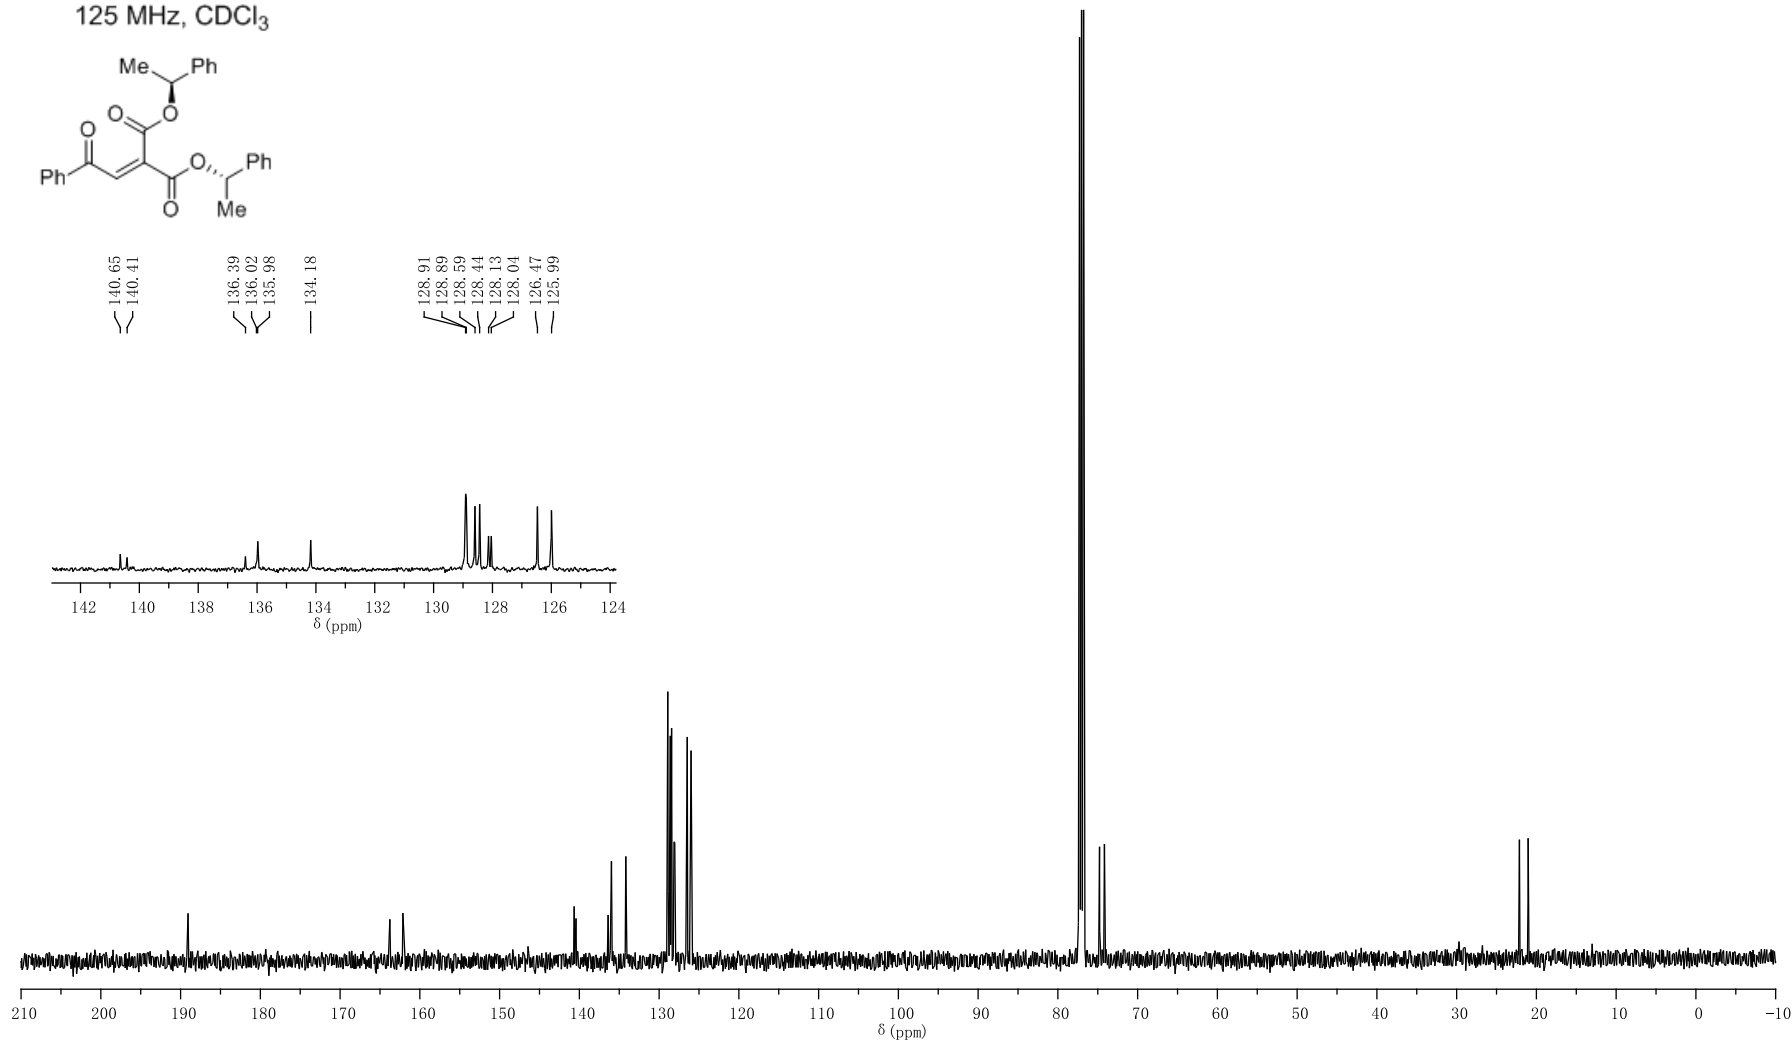

**Compound 16u**

7.843  
7.829  
7.816  
7.806  
7.786  
7.792  
7.378  
7.361  
7.339  
7.326  
7.312  
7.278  
7.246

6.091  
6.078  
6.065  
6.048  
6.035  
6.022

4.885

1.626  
1.624  
1.613  
1.611

<sup>1</sup>H NMR  
500 MHz, CDCl<sub>3</sub>

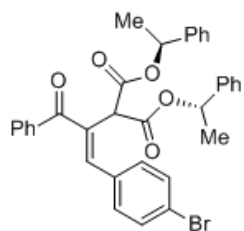

7.843  
7.829  
7.826  
7.619  
7.604  
7.589  
7.513  
7.502  
7.498  
7.486  
7.378  
7.361  
7.339  
7.326  
7.312  
7.283  
7.278  
7.263  
7.246

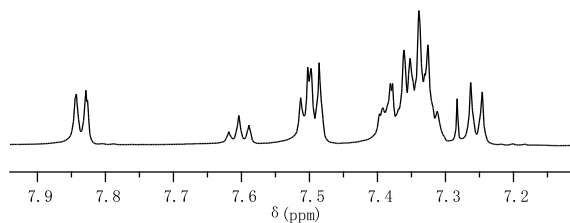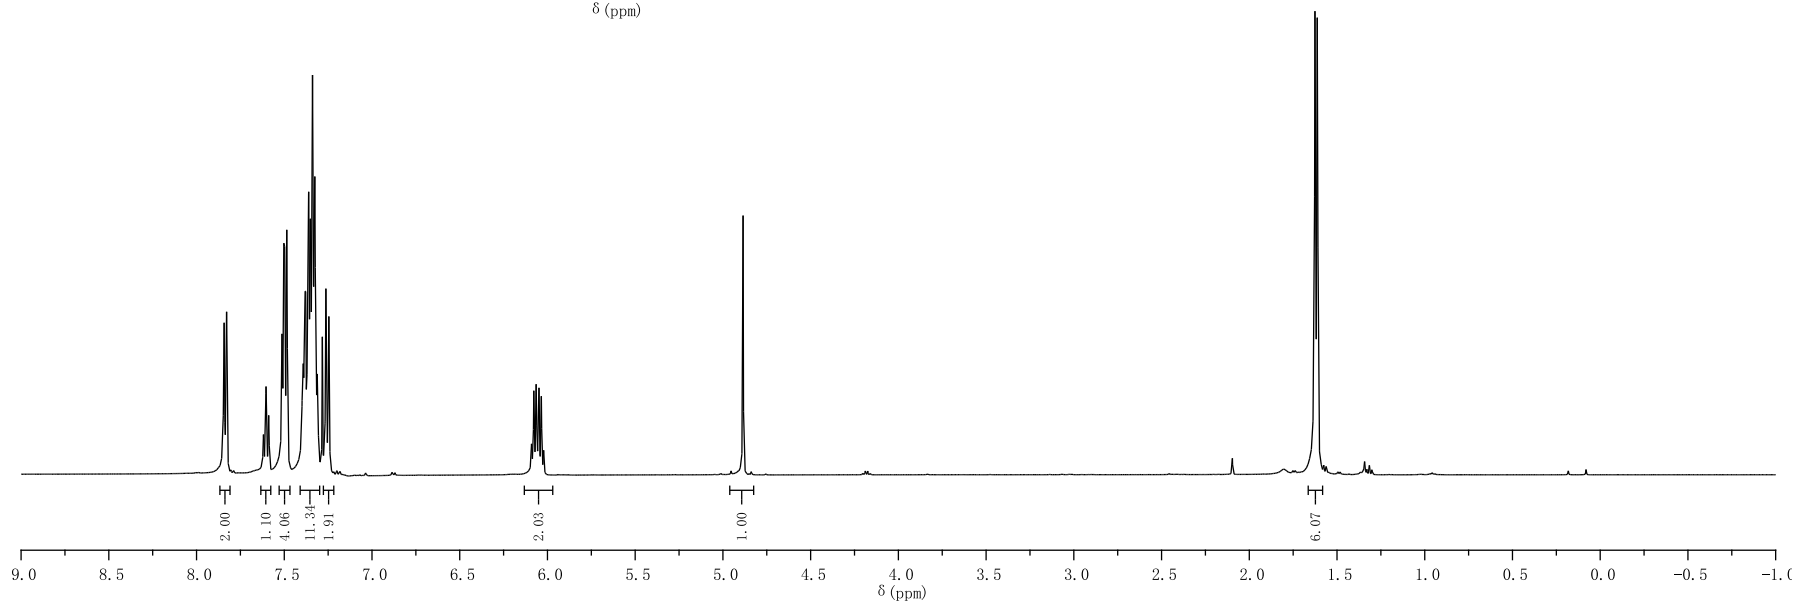

**Compound 16u**

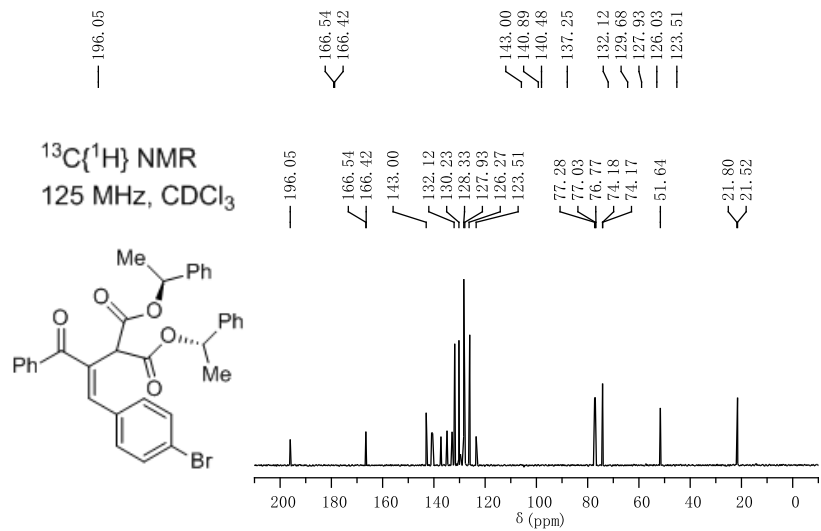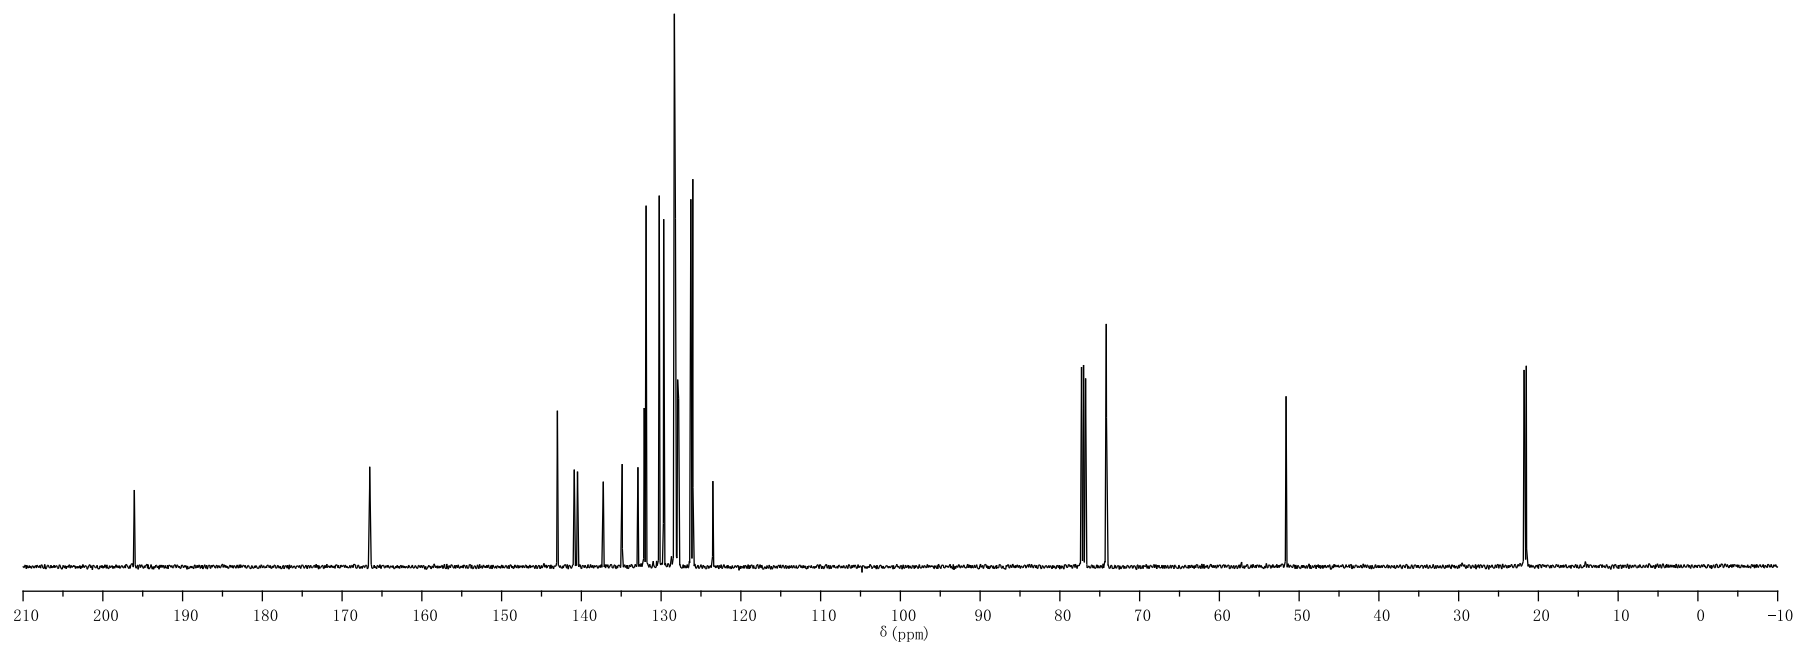

# Compound 1u

<sup>1</sup>H NMR  
500 MHz, CDCl<sub>3</sub>

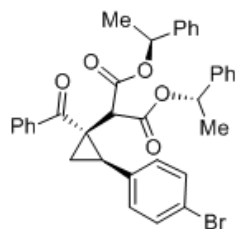

7.581  
7.568  
7.366  
7.345  
7.330  
7.310  
7.282  
7.204  
7.127  
7.016

5.981  
5.968  
5.955  
5.942  
5.885  
5.872  
5.858  
5.845

3.041  
3.025  
3.008  
2.849

1.908  
1.894  
1.881  
1.610  
1.453  
1.293

7.581  
7.568  
7.371  
7.366  
7.353  
7.345  
7.333  
7.330  
7.317  
7.310  
7.305  
7.282  
7.221  
7.204  
7.141  
7.127  
7.033  
7.016

1.908  
1.894  
1.881  
1.677  
1.672  
1.659  
1.610  
1.597  
1.466  
1.453

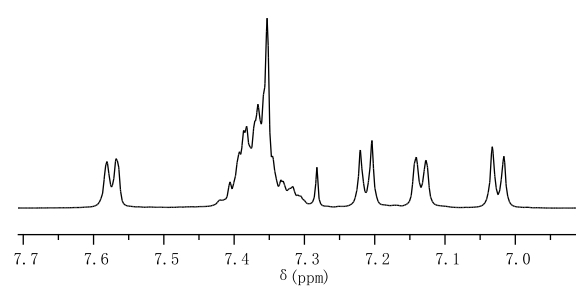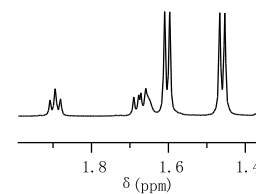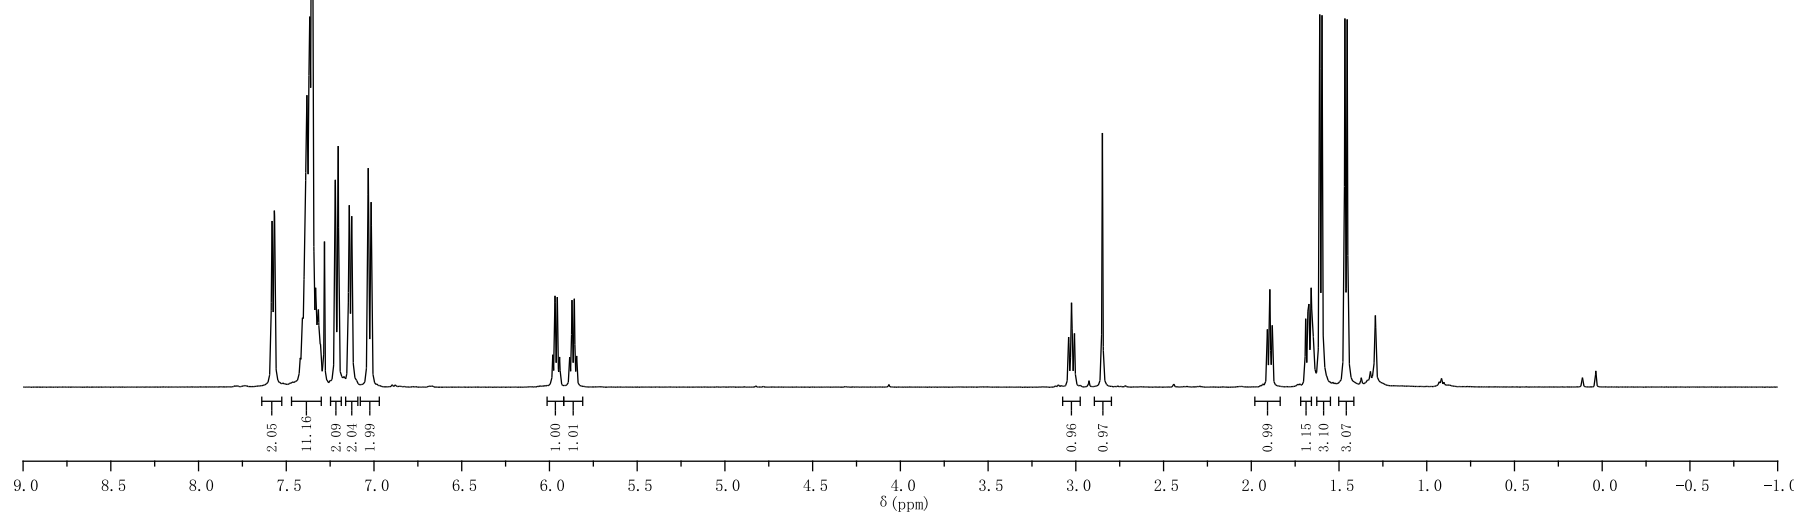

# Compound 1u

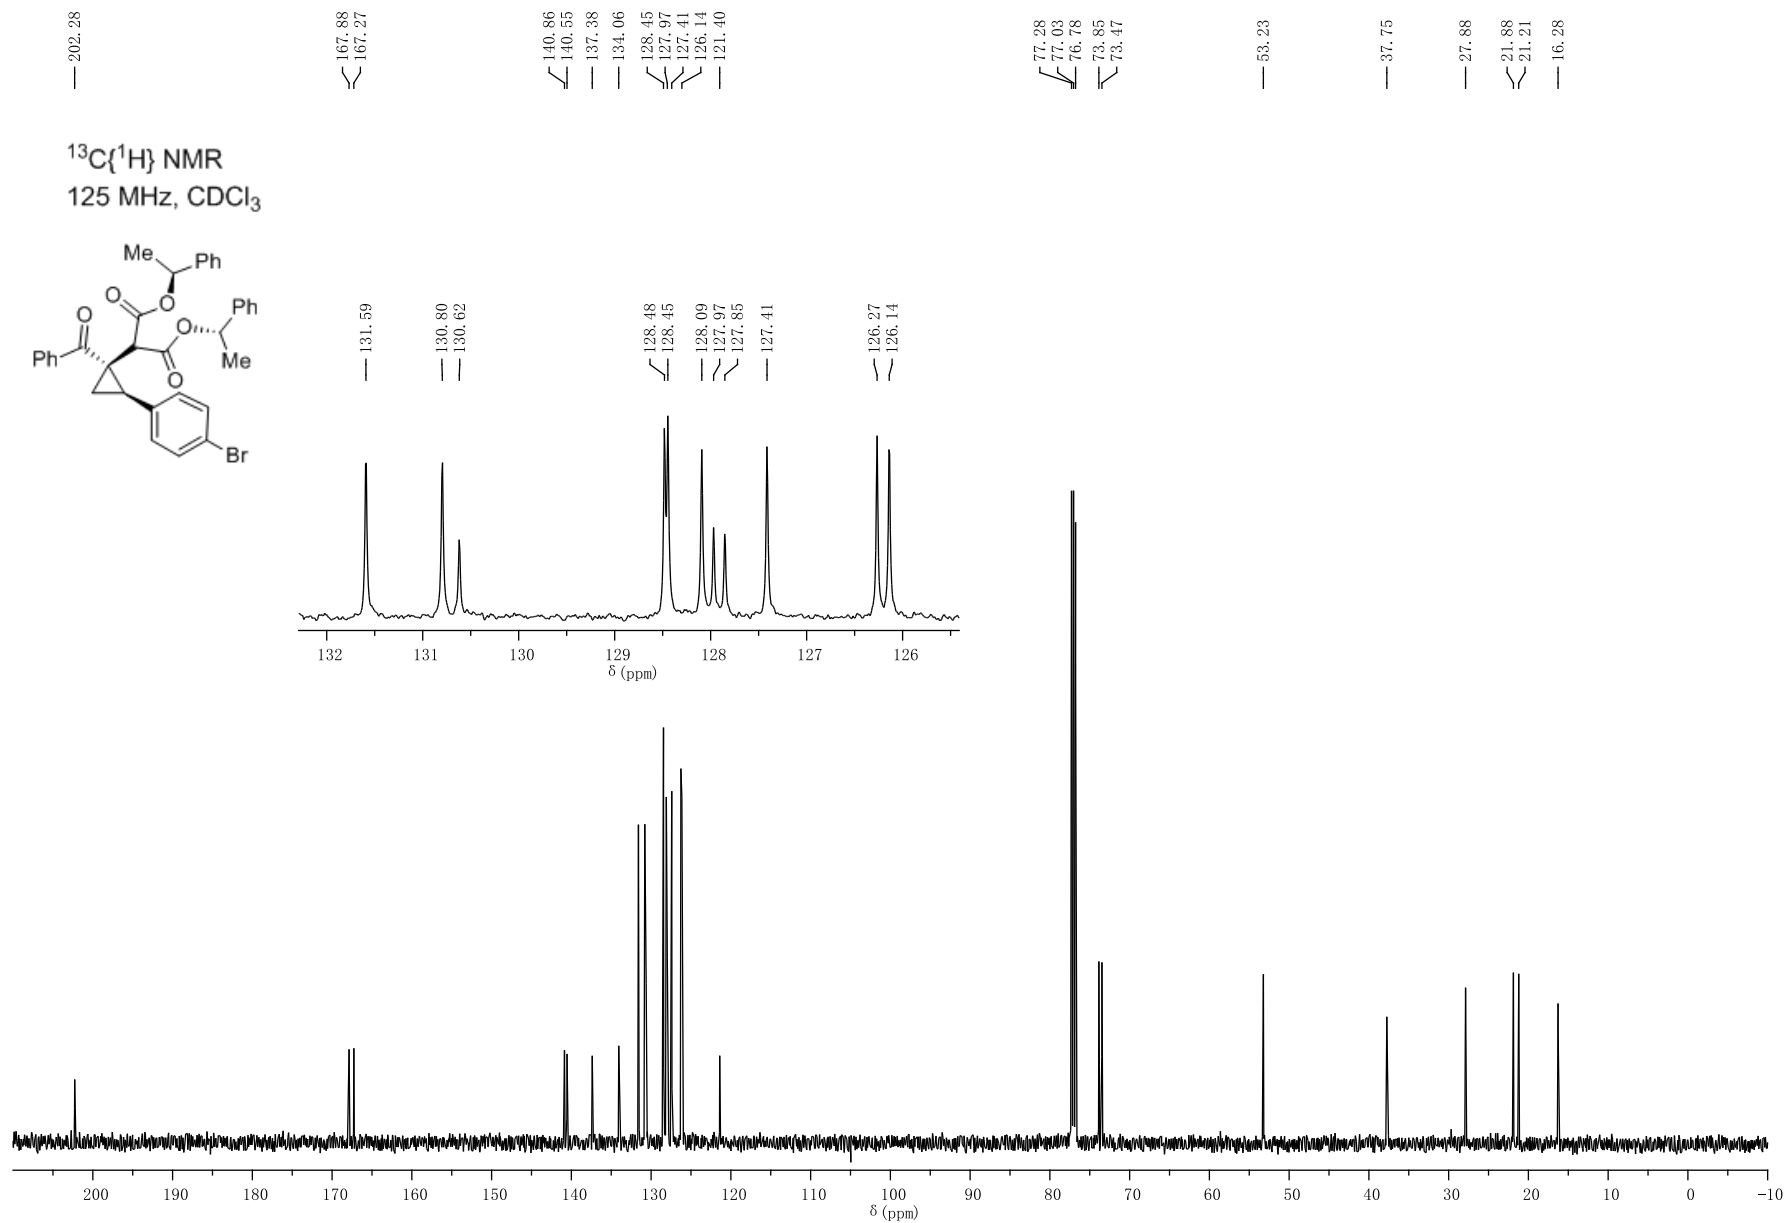



**Compound 1u'**

7.427  
7.410  
7.362  
7.355  
7.344  
7.330  
7.325  
7.318  
7.302  
7.298  
7.284  
7.245  
7.239  
7.236  
7.231  
7.225  
7.218  
7.215  
7.109  
7.106  
7.094  
7.088  
7.071

5.873  
5.860  
5.847  
5.834  
5.785  
5.772  
5.759  
5.746

3.115  
3.098  
3.081  
— 2.749

1.928  
1.914  
1.900  
1.641  
1.605  
1.422  
1.409  
1.359  
1.346  
1.288

— 0.032

<sup>1</sup>H NMR  
500 MHz, CDCl<sub>3</sub>

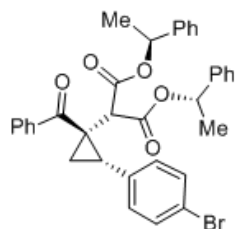

7.584  
7.571  
7.568  
7.498  
7.483  
7.469  
7.438  
7.423  
7.410

7.362  
7.355  
7.347  
7.337  
7.318  
7.298  
7.284

7.245  
7.239  
7.236  
7.231  
7.225  
7.218  
7.215

7.109  
7.106  
7.088  
7.071

1.928  
1.914  
1.900  
1.659  
1.646  
1.641  
1.628  
1.605

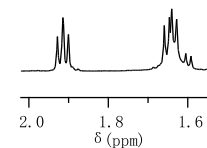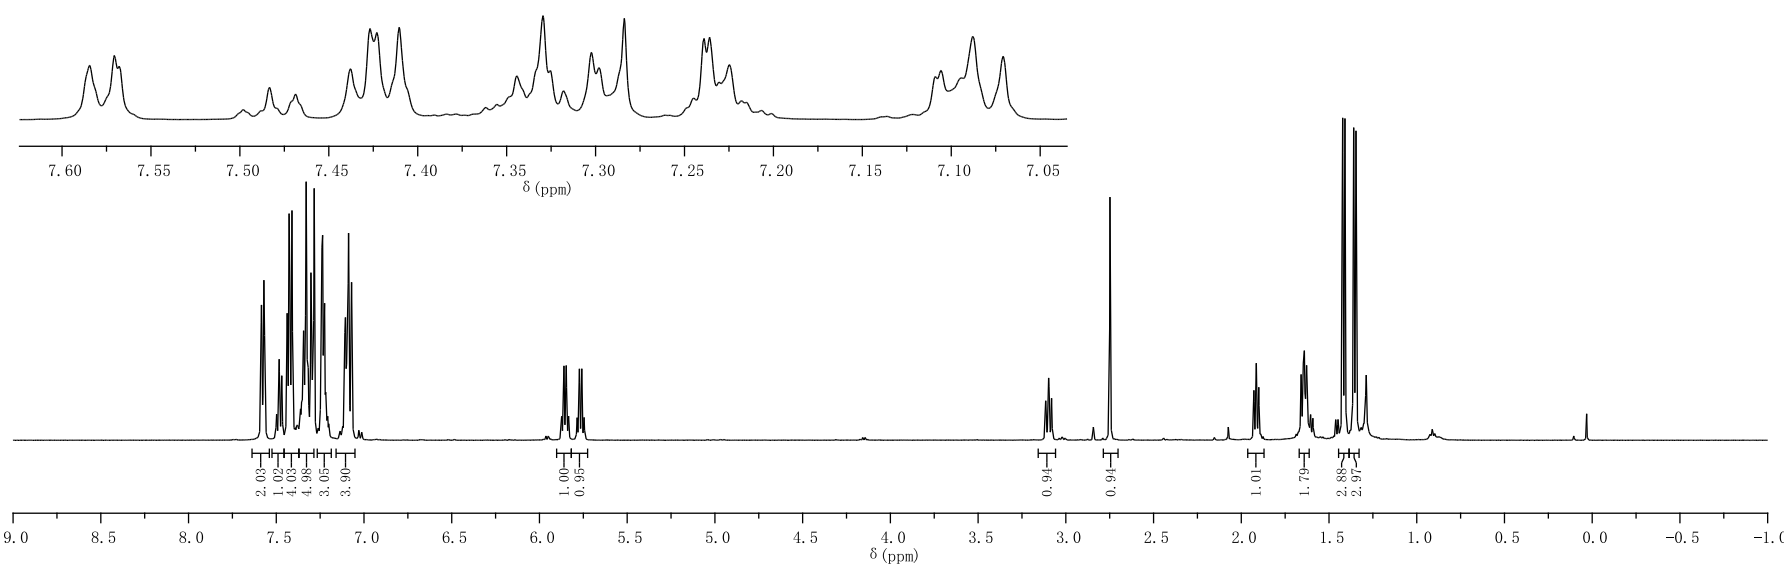

# Compound 1u'

202.35

167.97  
167.20

141.30  
140.32  
137.70  
134.30  
128.34  
128.12  
127.49  
125.94  
121.43

77.28  
77.03  
76.78  
74.23  
73.72

53.33

38.30

27.41

21.84

21.10

16.72

$^{13}\text{C}\{^1\text{H}\}$  NMR  
125 MHz,  $\text{CDCl}_3$

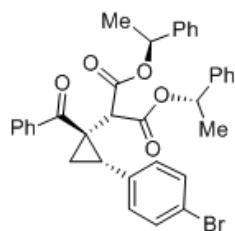

131.66

130.79  
130.64

128.47  
128.34  
128.18  
128.12  
127.71  
127.49

126.72

125.94

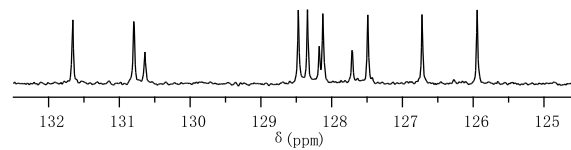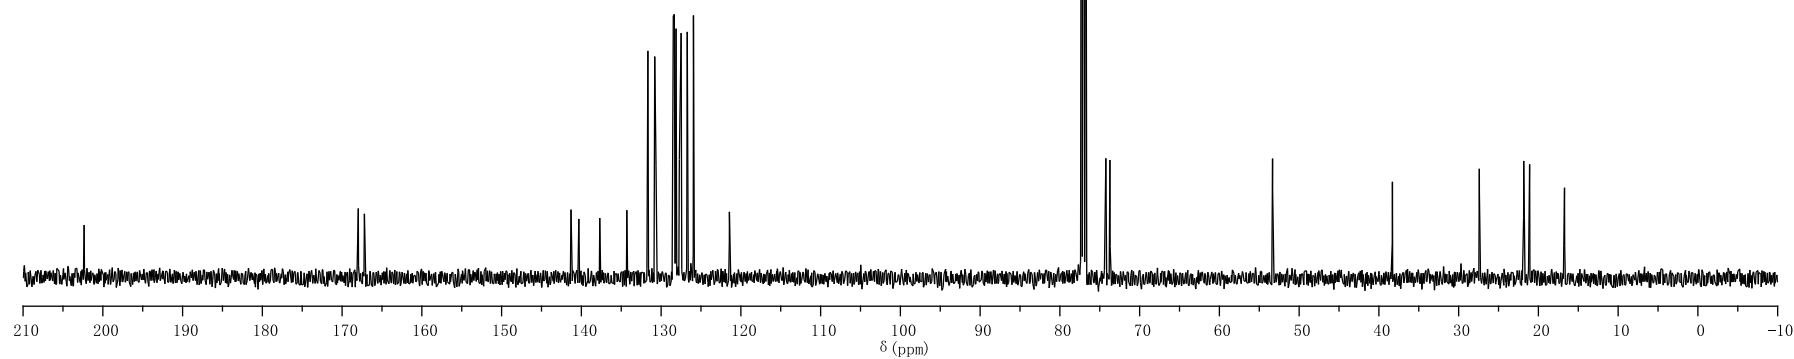

## 6.2 Copies of NMR spectra for products 3

### Compound 3aa

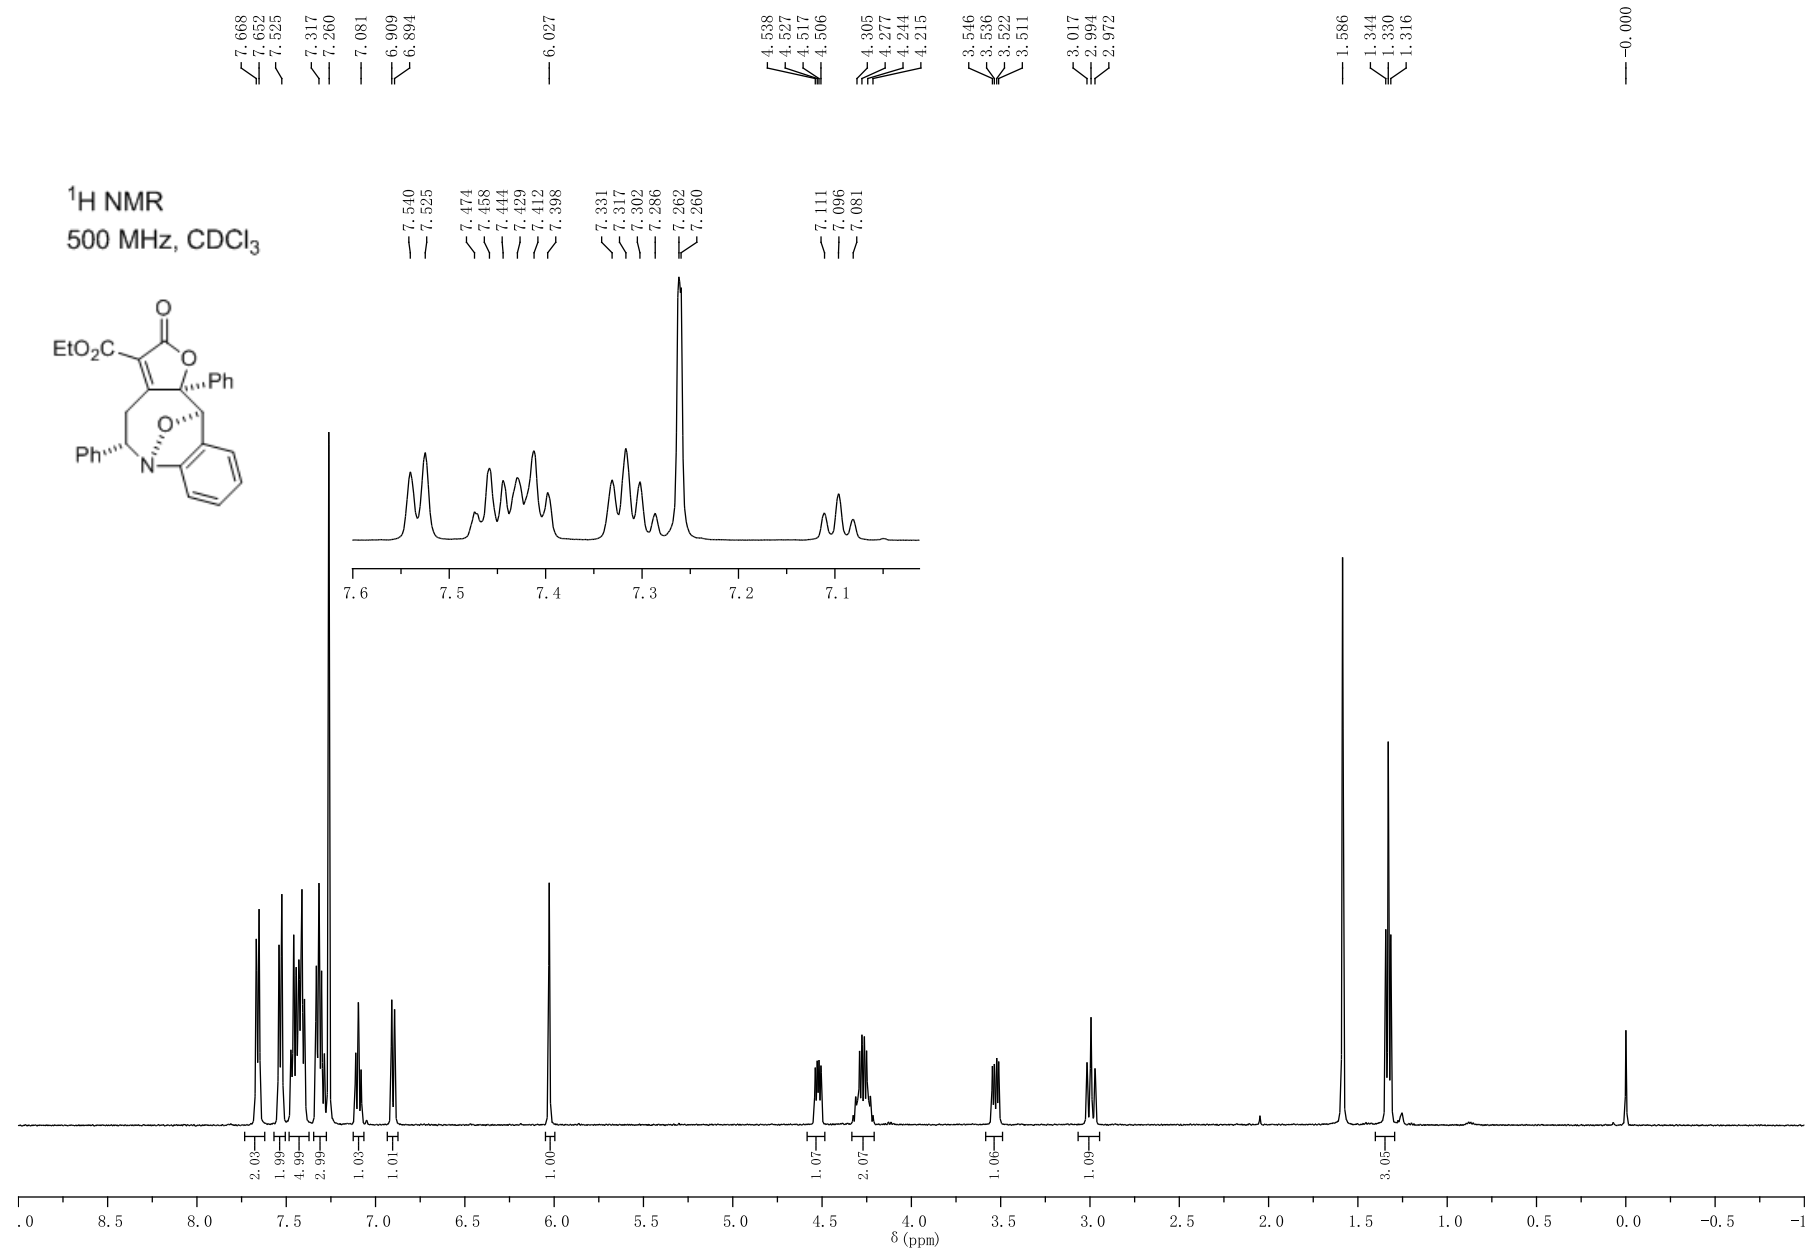

# Compound 3aa

$^{13}\text{C}\{^1\text{H}\}$  NMR  
125 MHz,  $\text{CDCl}_3$

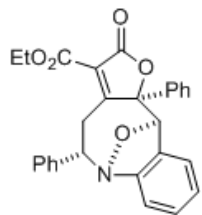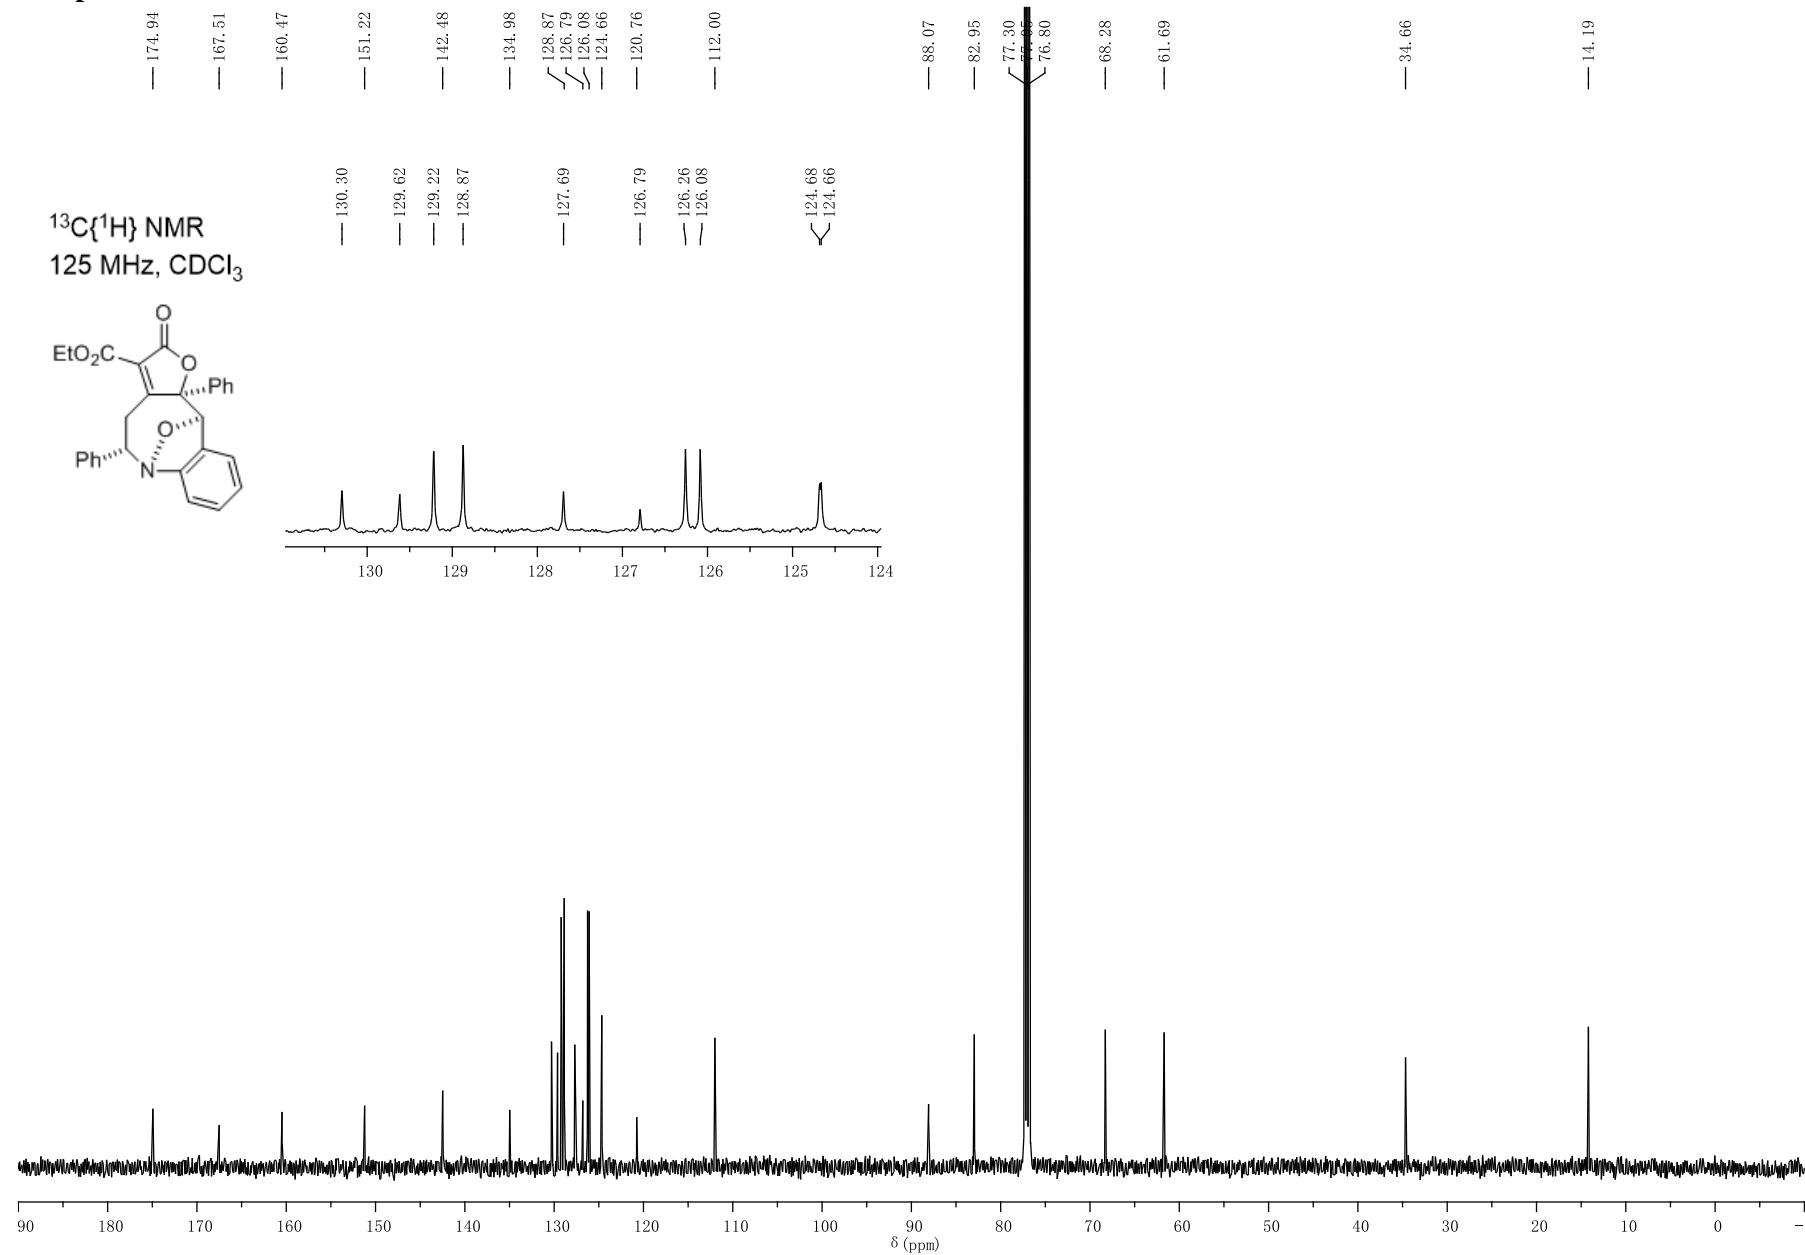

**Compound 3ba**

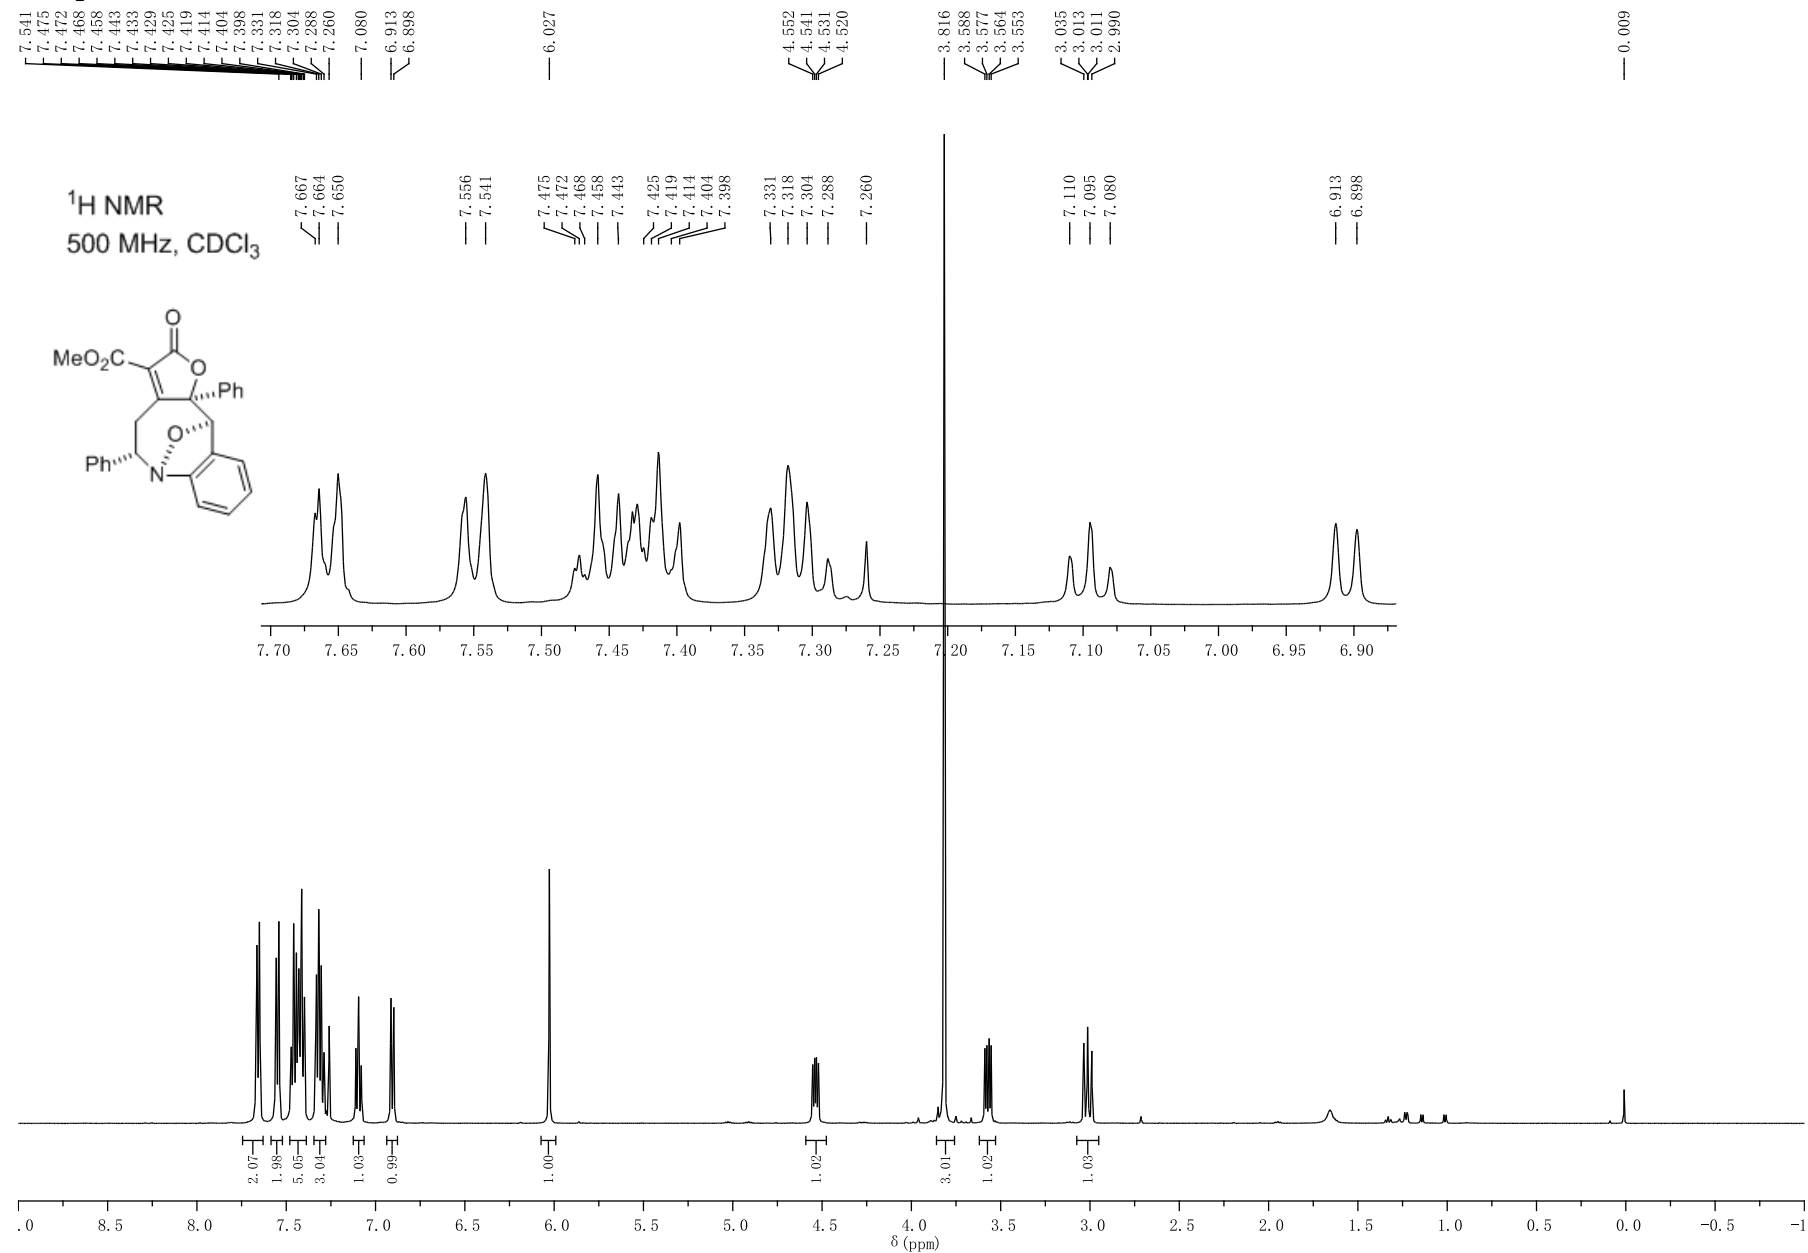

# Compound 3ba

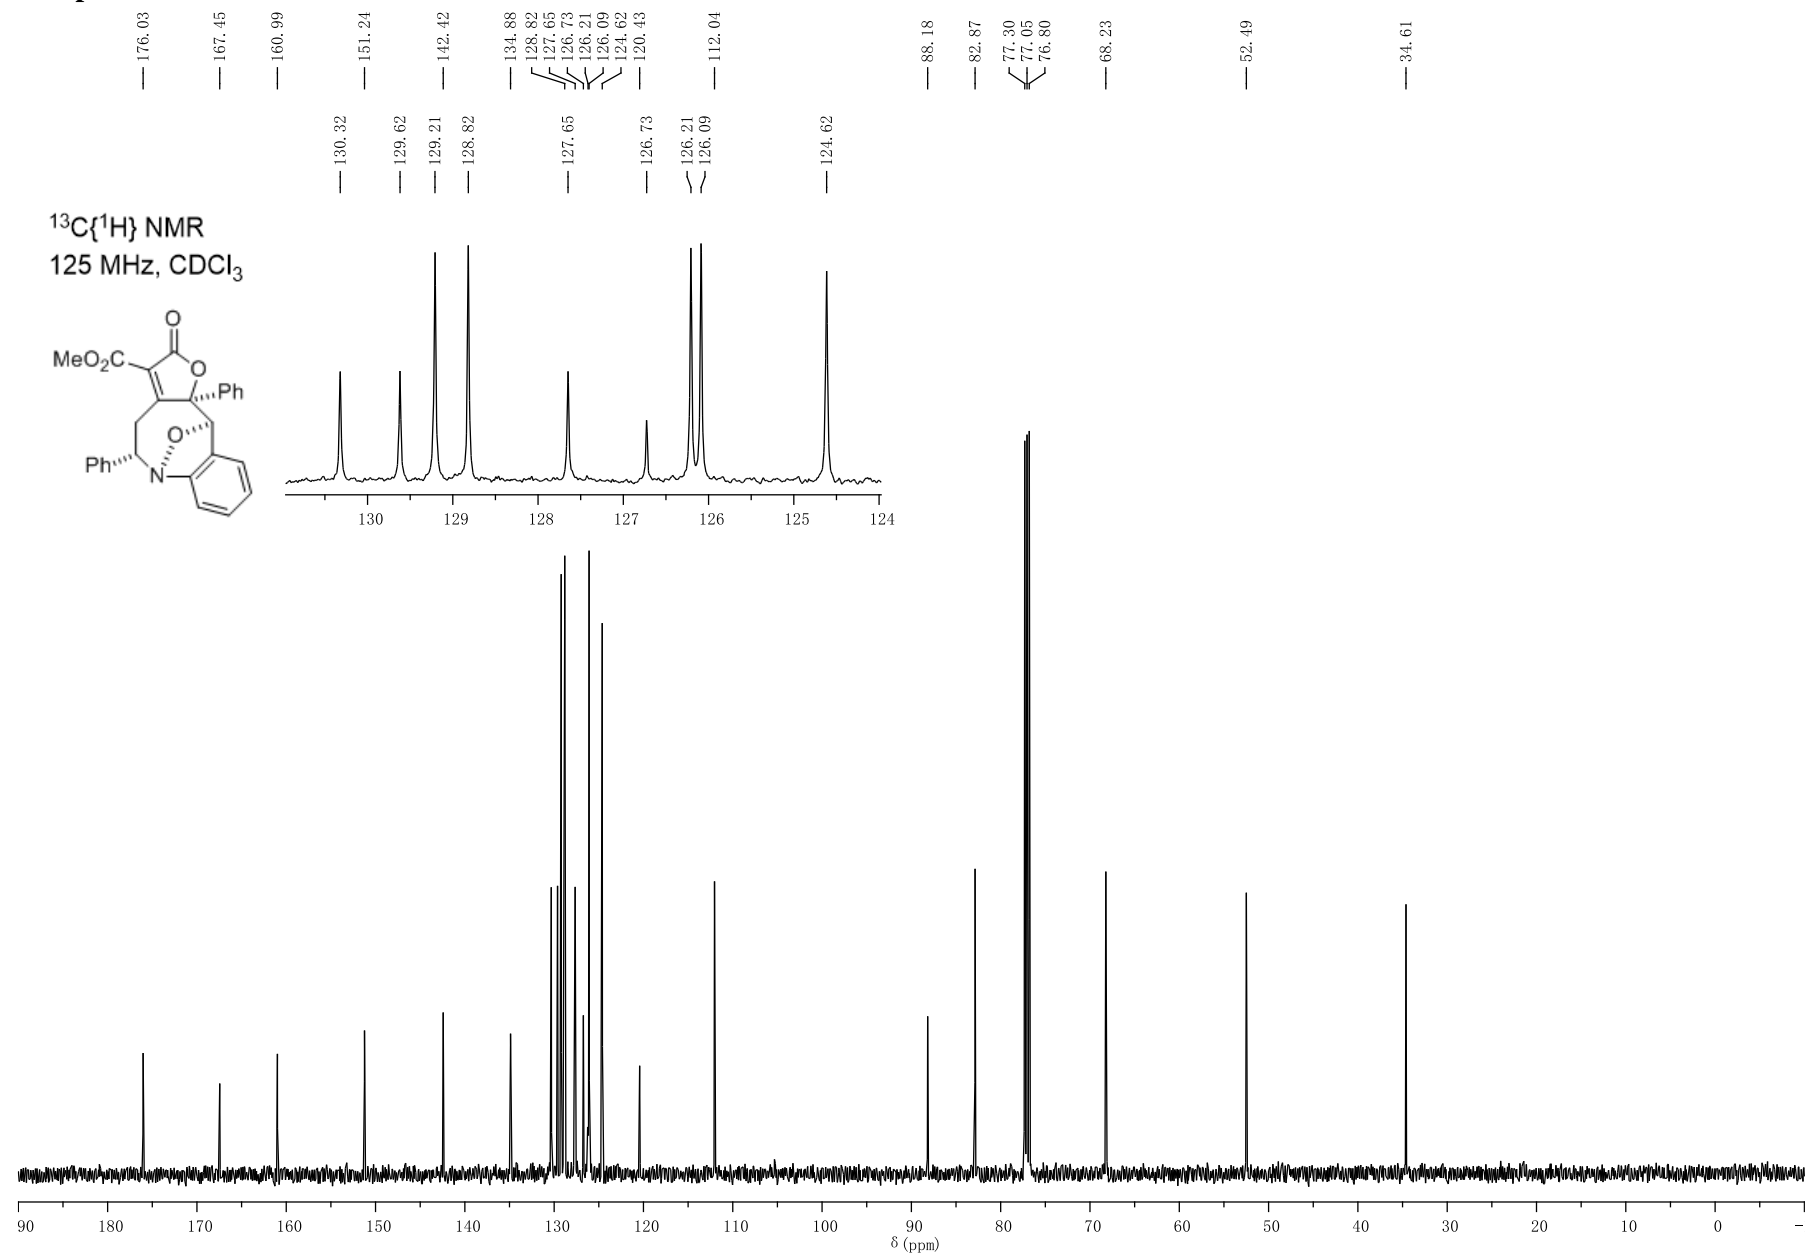

# Compound 3ca

7.679  
7.676  
7.662  
7.655  
7.444  
7.328  
7.260  
7.080  
6.911  
6.895  
6.028  
5.159  
5.147  
5.134  
5.122  
5.109  
4.548  
4.537  
4.527  
4.516  
3.524  
3.513  
3.500  
3.489  
3.013  
2.992  
2.989  
2.968  
1.321  
1.309

<sup>1</sup>H NMR  
500 MHz, CDCl<sub>3</sub>

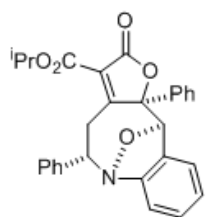

7.547  
7.531

7.477  
7.473  
7.469  
7.456  
7.444  
7.429  
7.420  
7.411  
7.404

7.338  
7.313  
7.307  
7.303  
7.288  
7.260

7.111  
7.110  
7.095  
7.081  
7.080

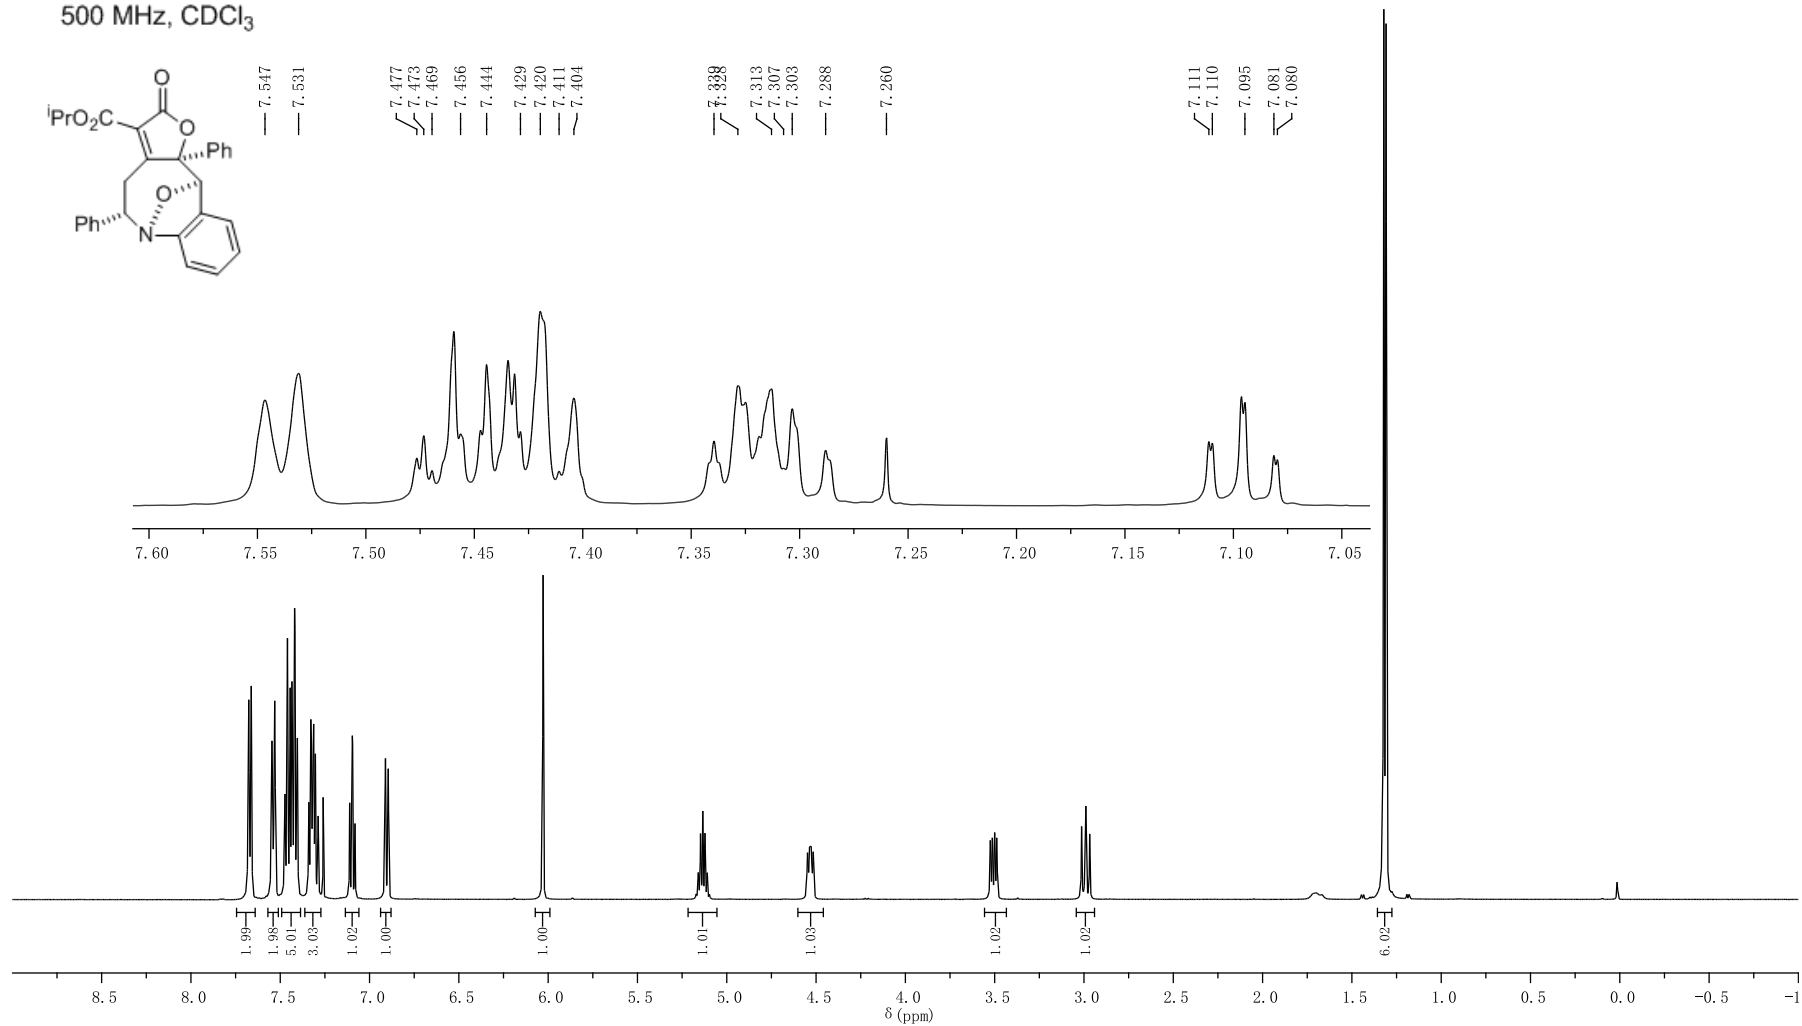

# Compound 3ca

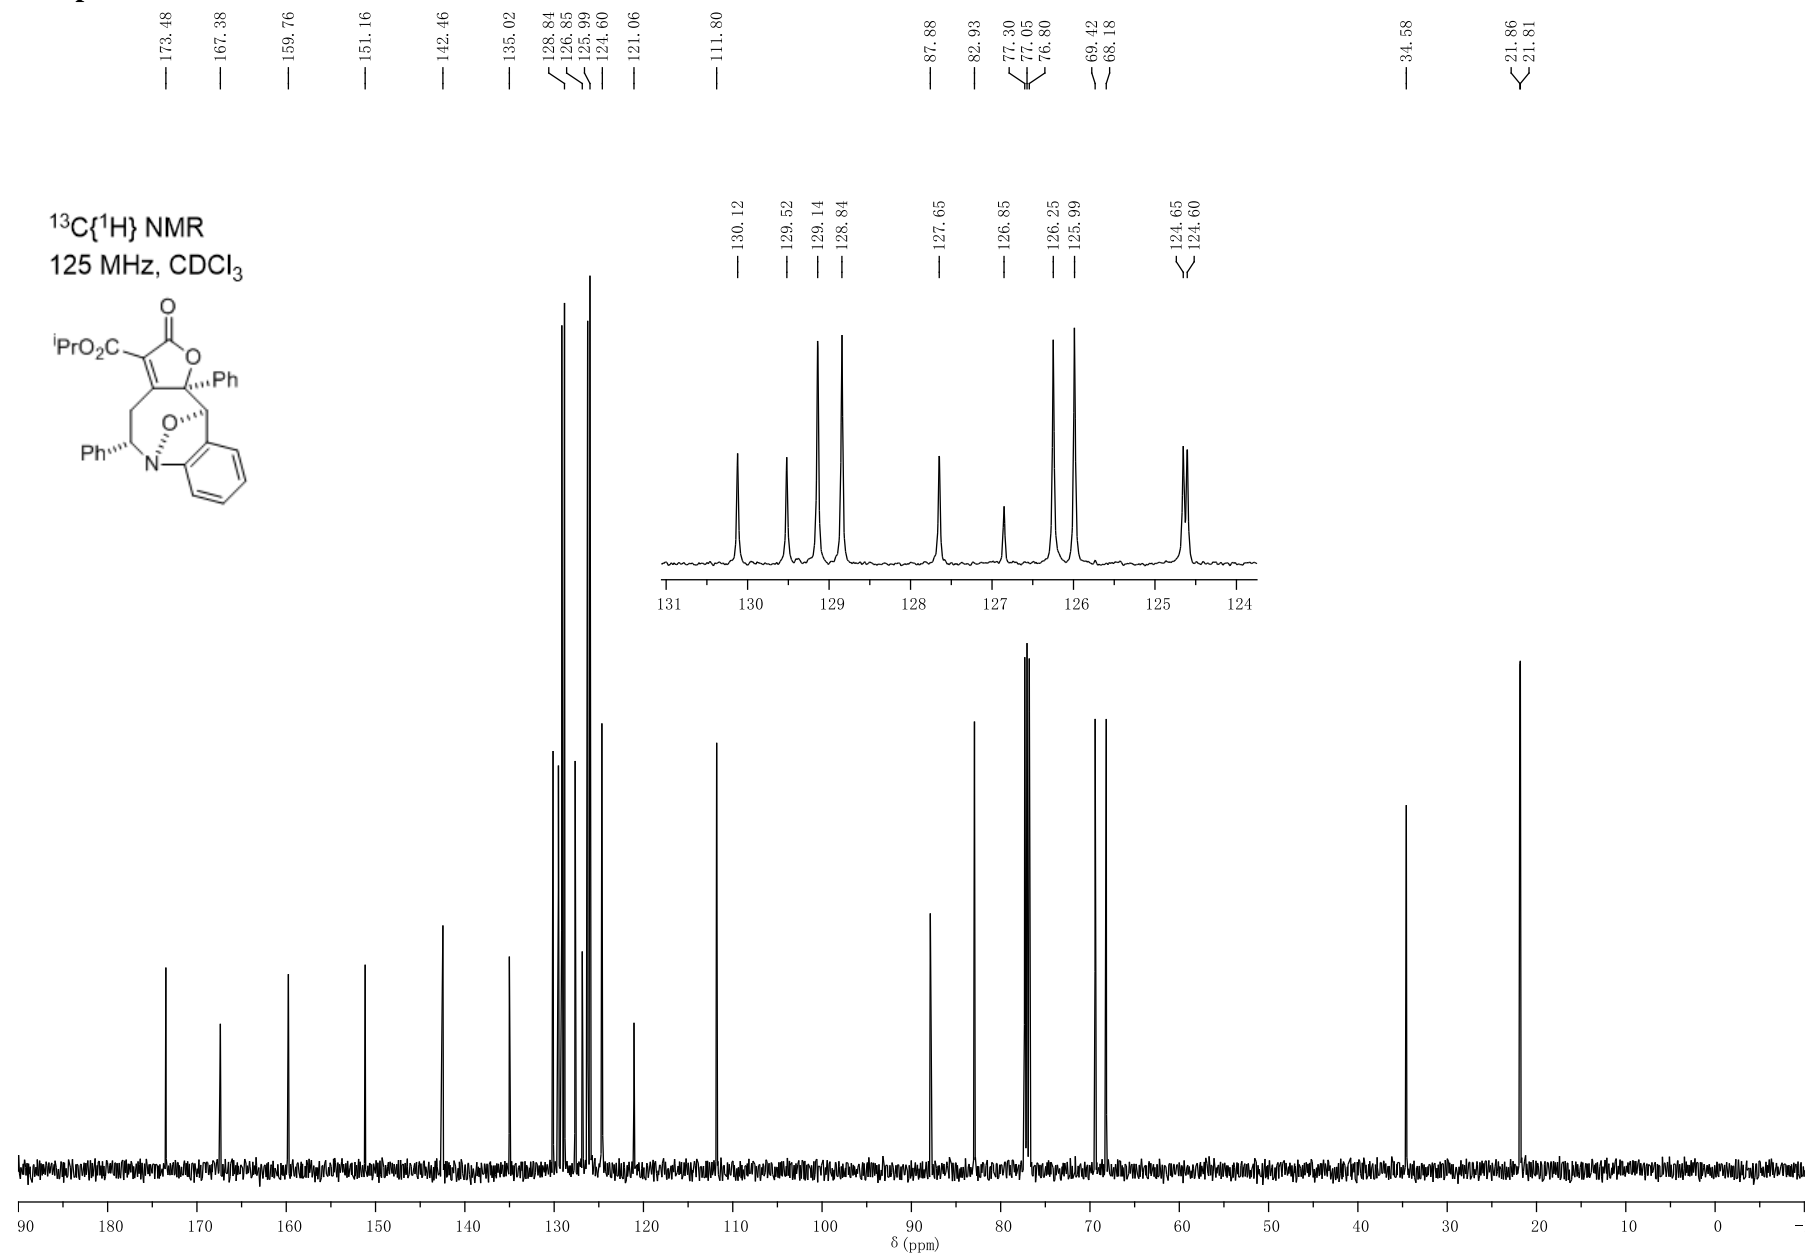



# Compound 3da

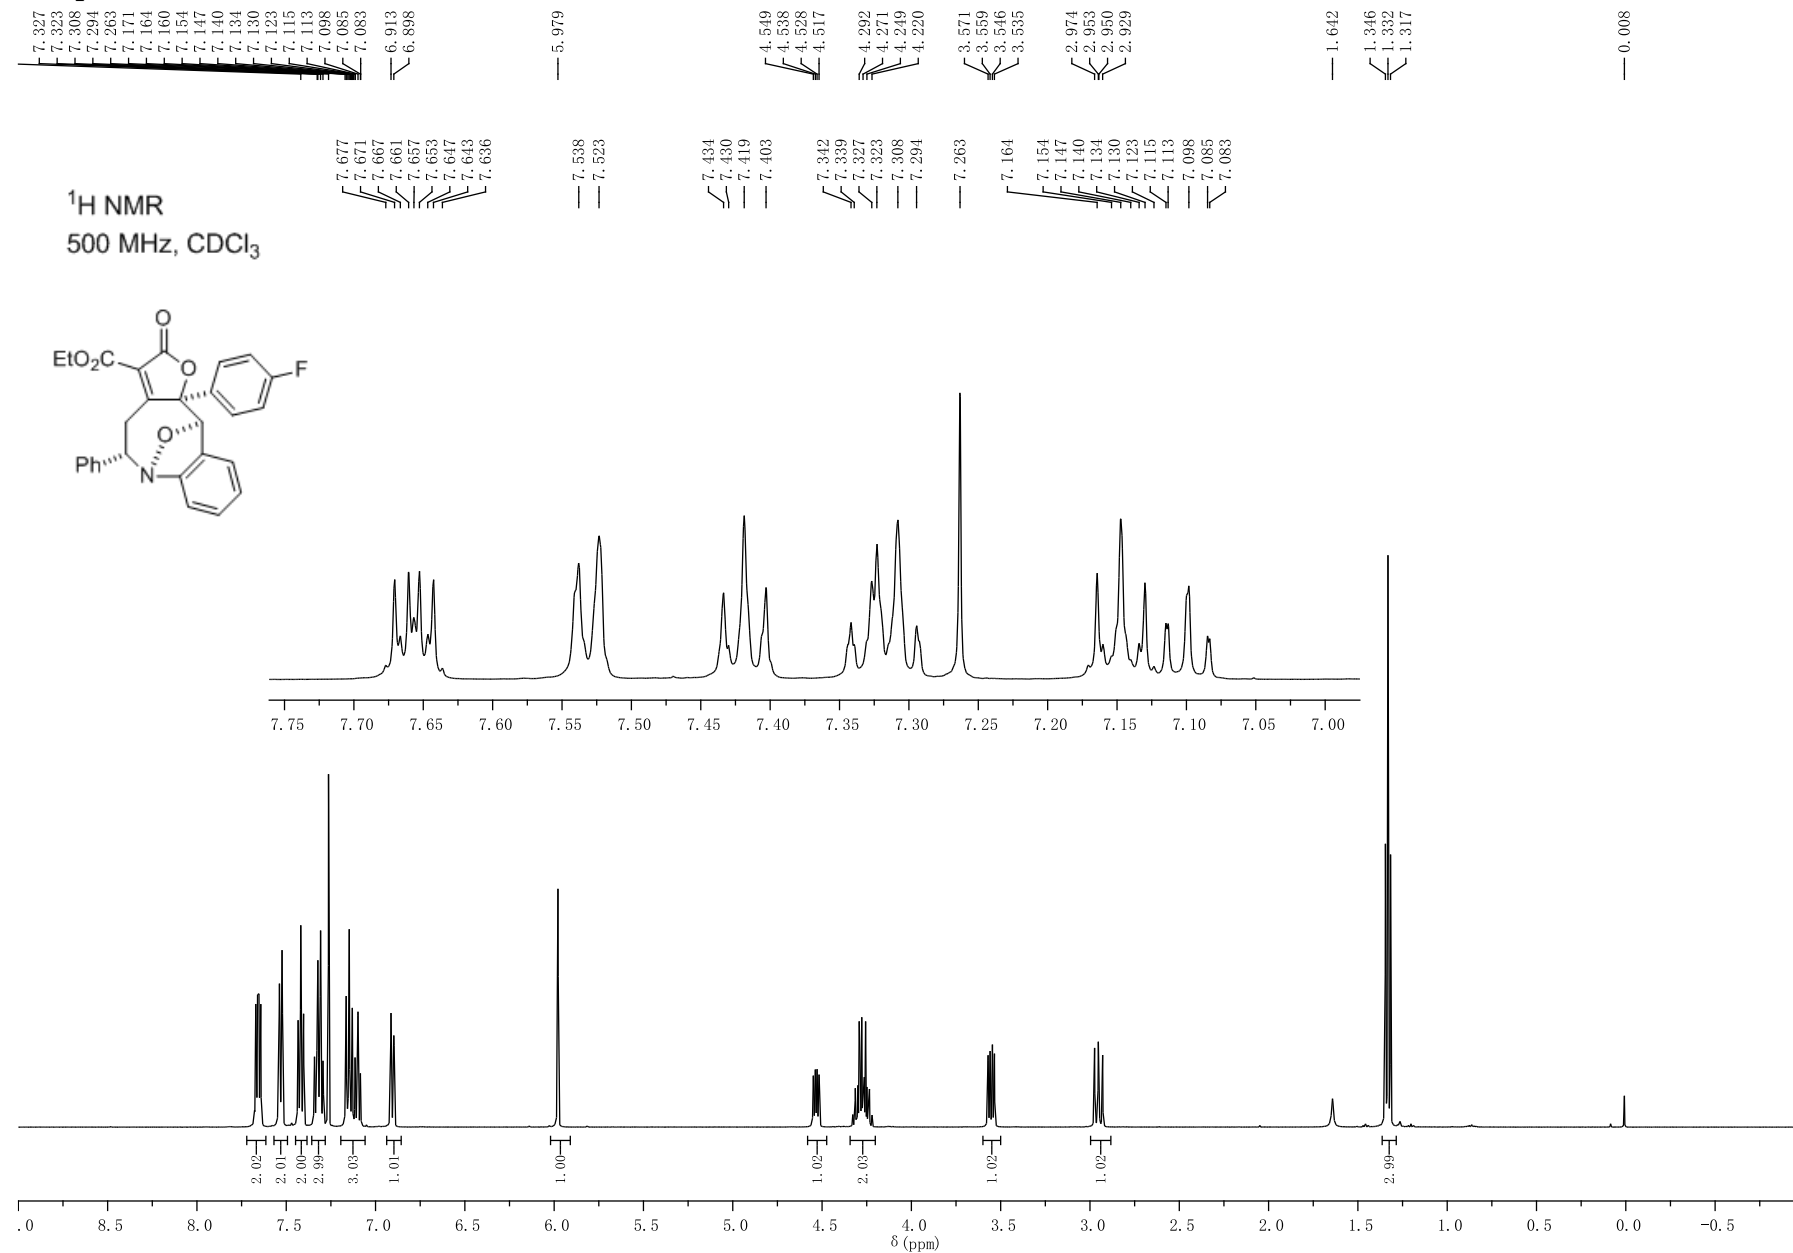

### Compound 3da

$^{13}\text{C}\{^1\text{H}\}$  NMR  
125 MHz,  $\text{CDCl}_3$

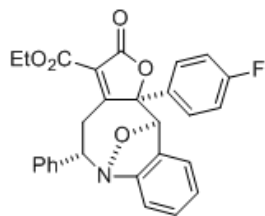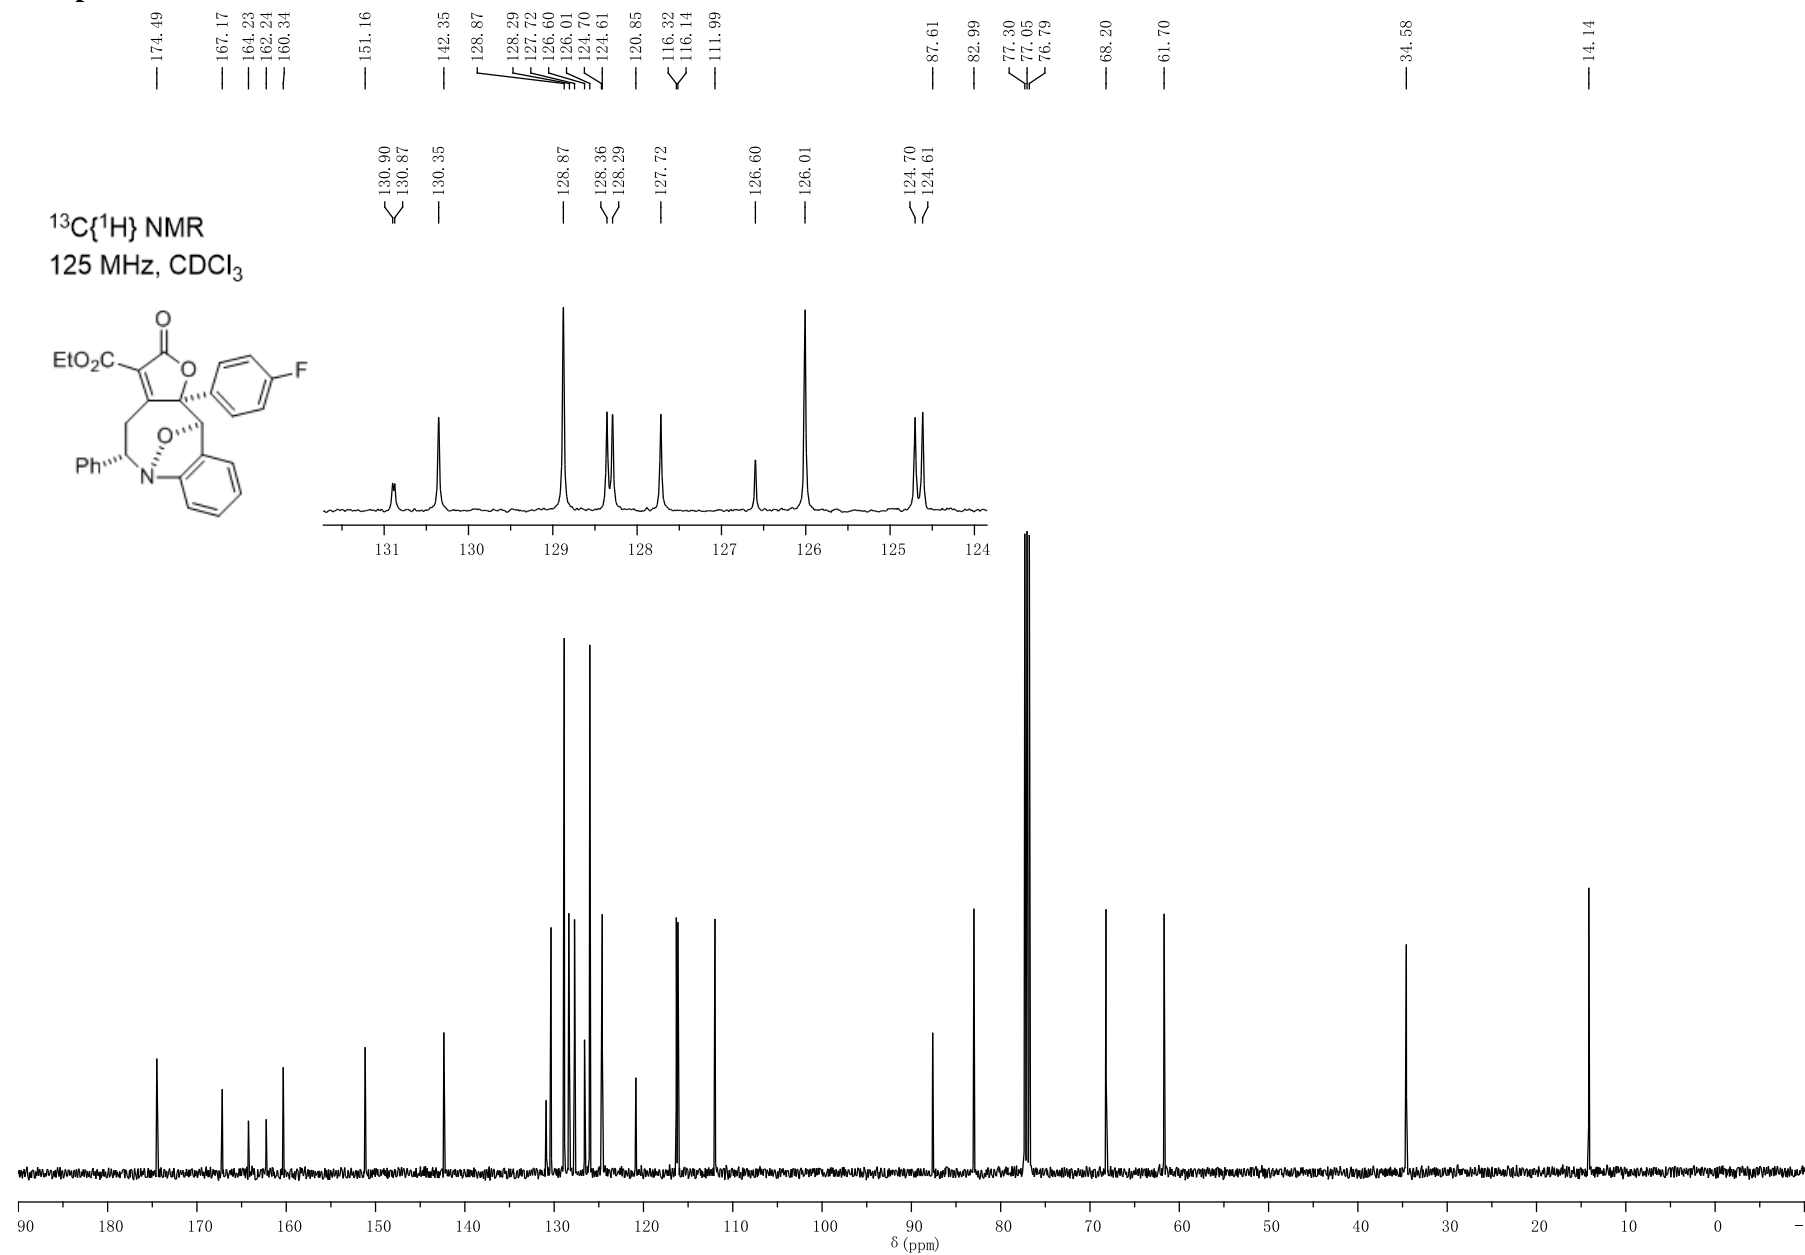

# Compound 3da

$^{19}\text{F}$  NMR  
470 MHz,  $\text{CDCl}_3$

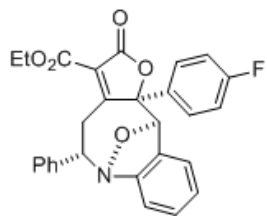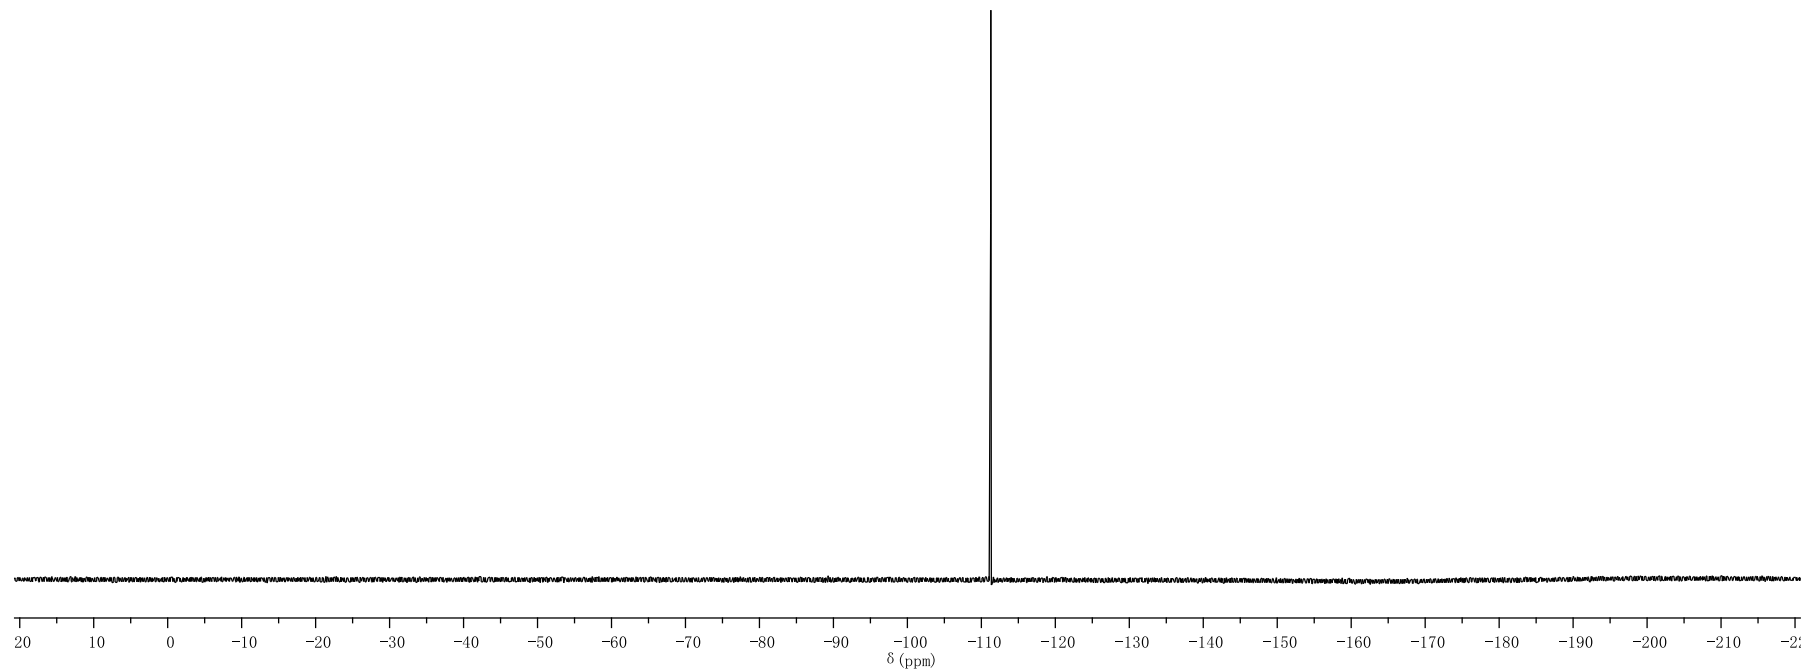

# Compound 3ea

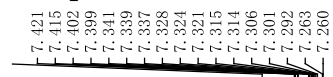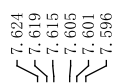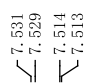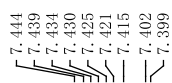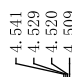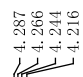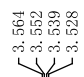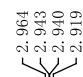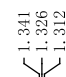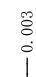

<sup>1</sup>H NMR  
500 MHz, CDCl<sub>3</sub>

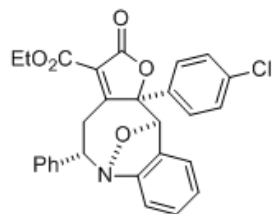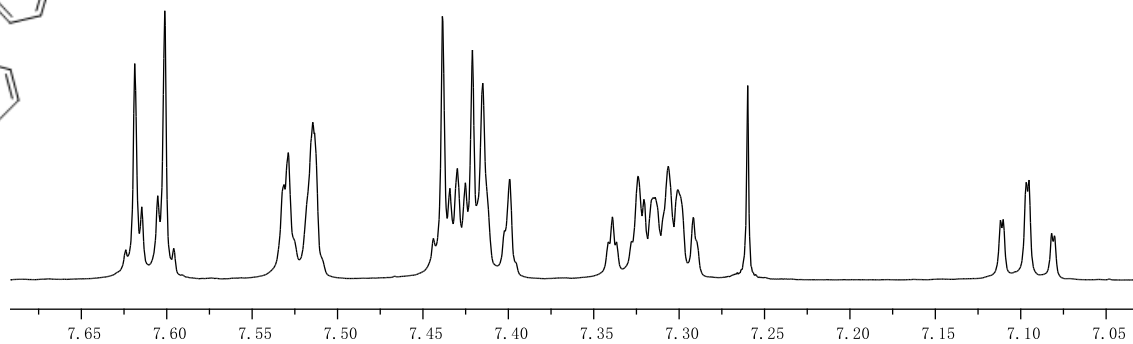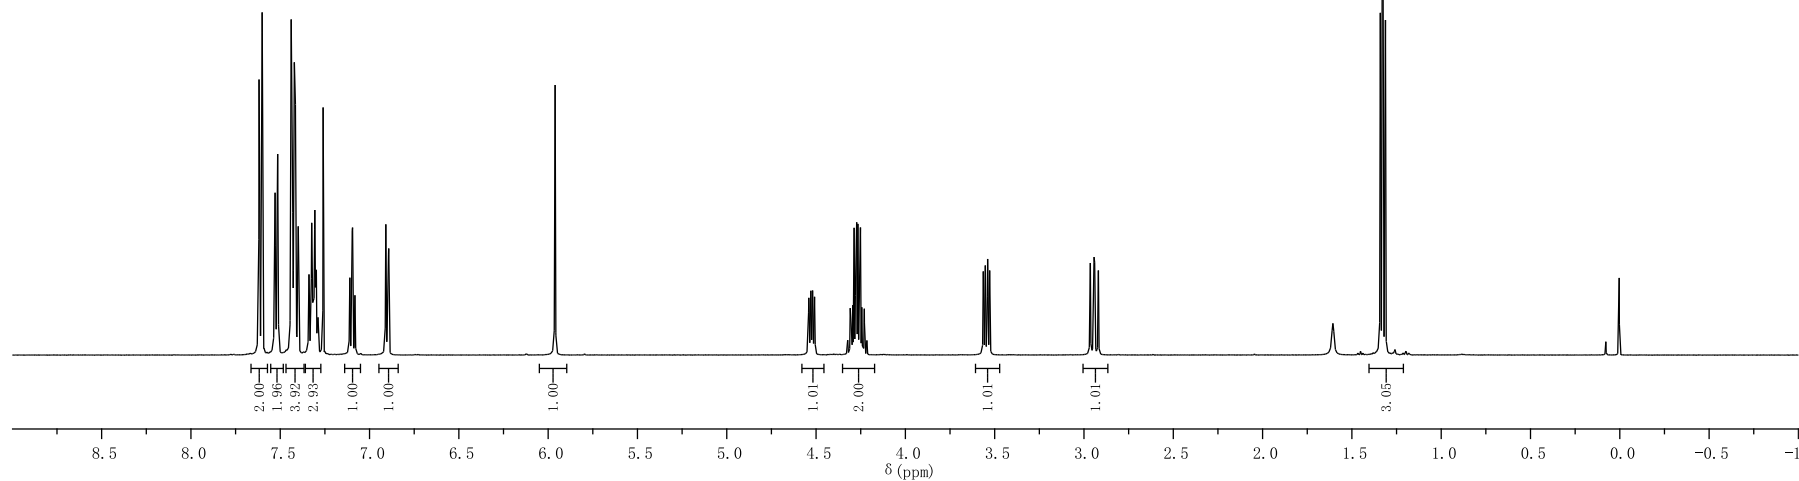

### Compound 3ea

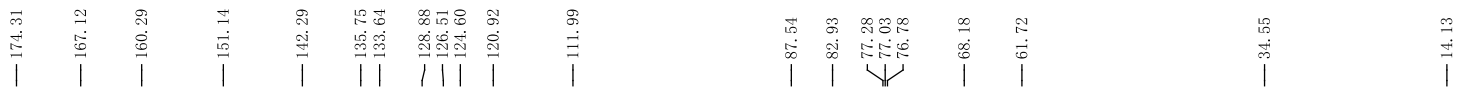

$^{13}\text{C}\{^1\text{H}\}$  NMR  
125 MHz,  $\text{CDCl}_3$

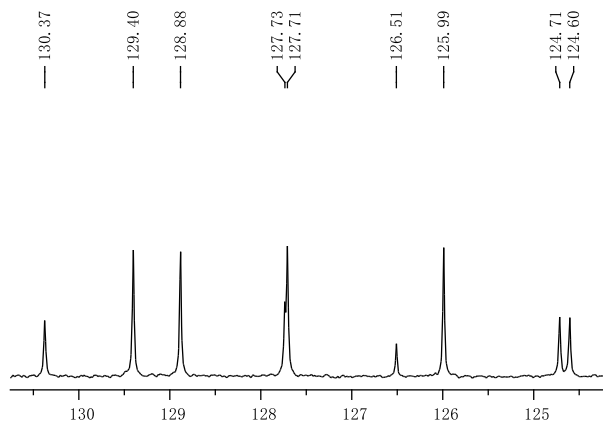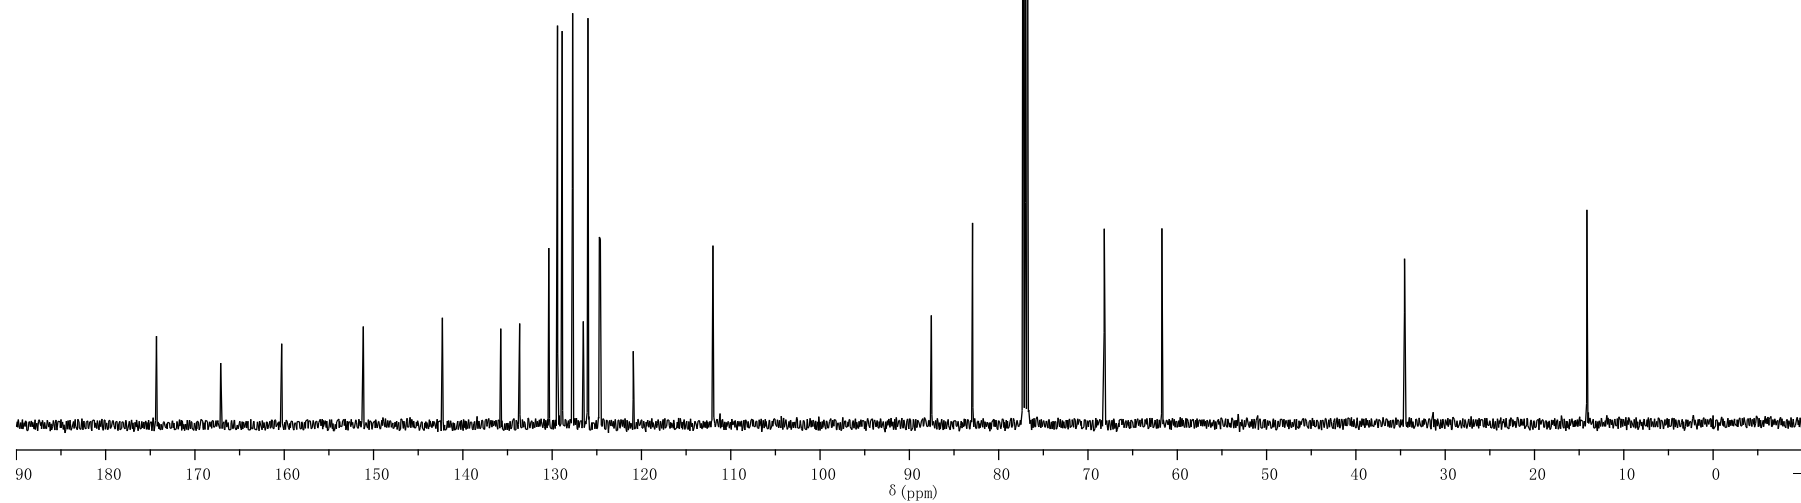

# Compound 3fa

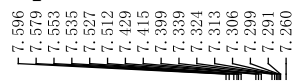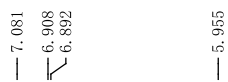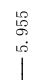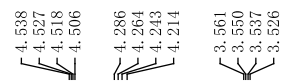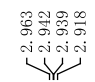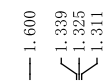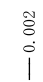

<sup>1</sup>H NMR  
500 MHz, CDCl<sub>3</sub>

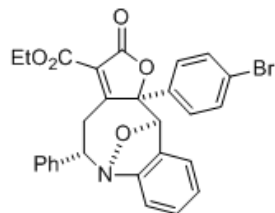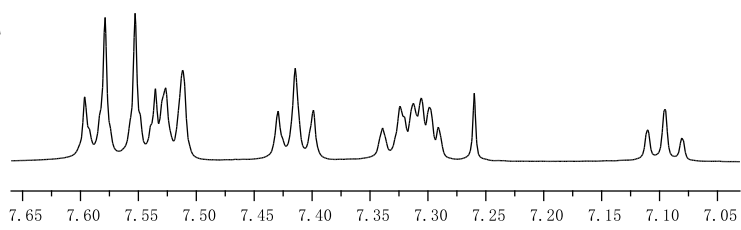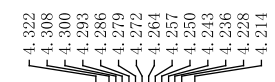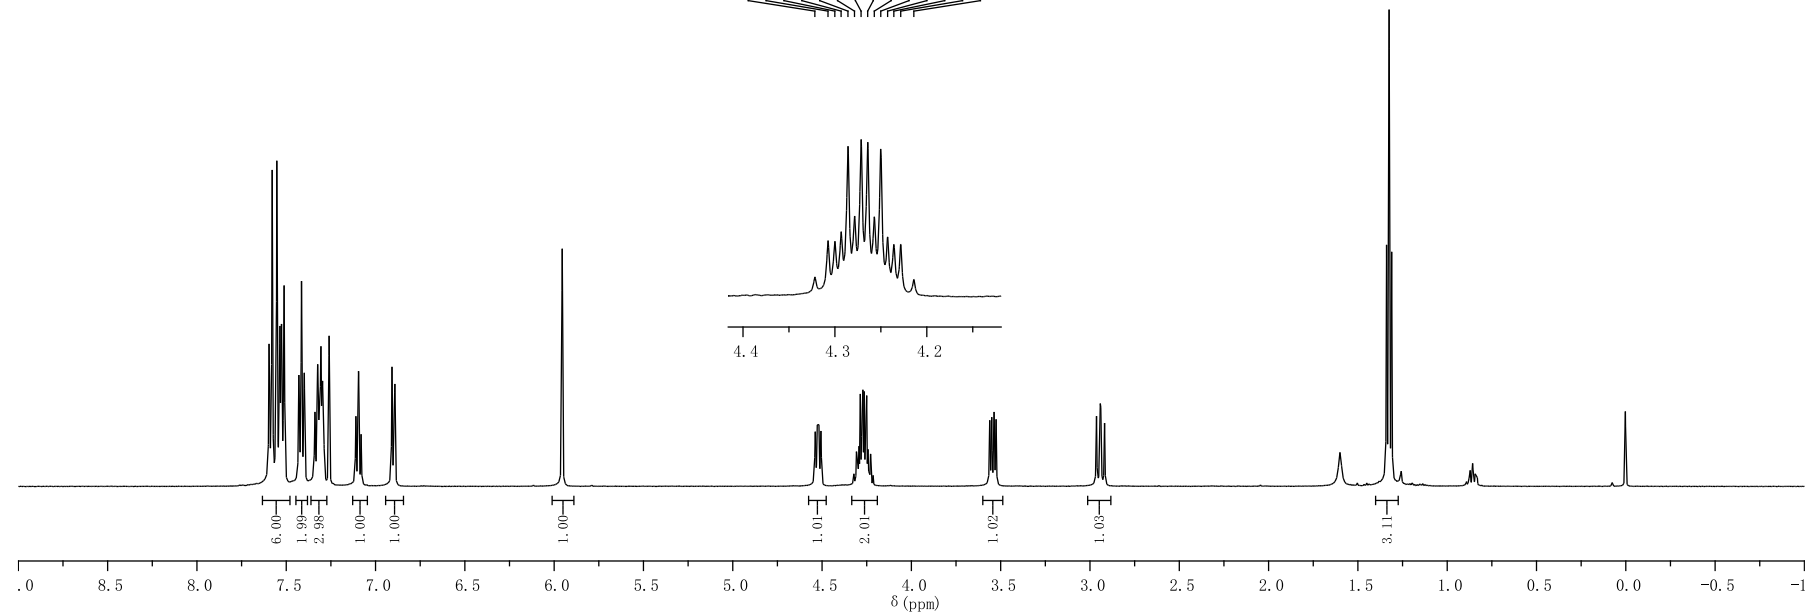

# Compound 3fa

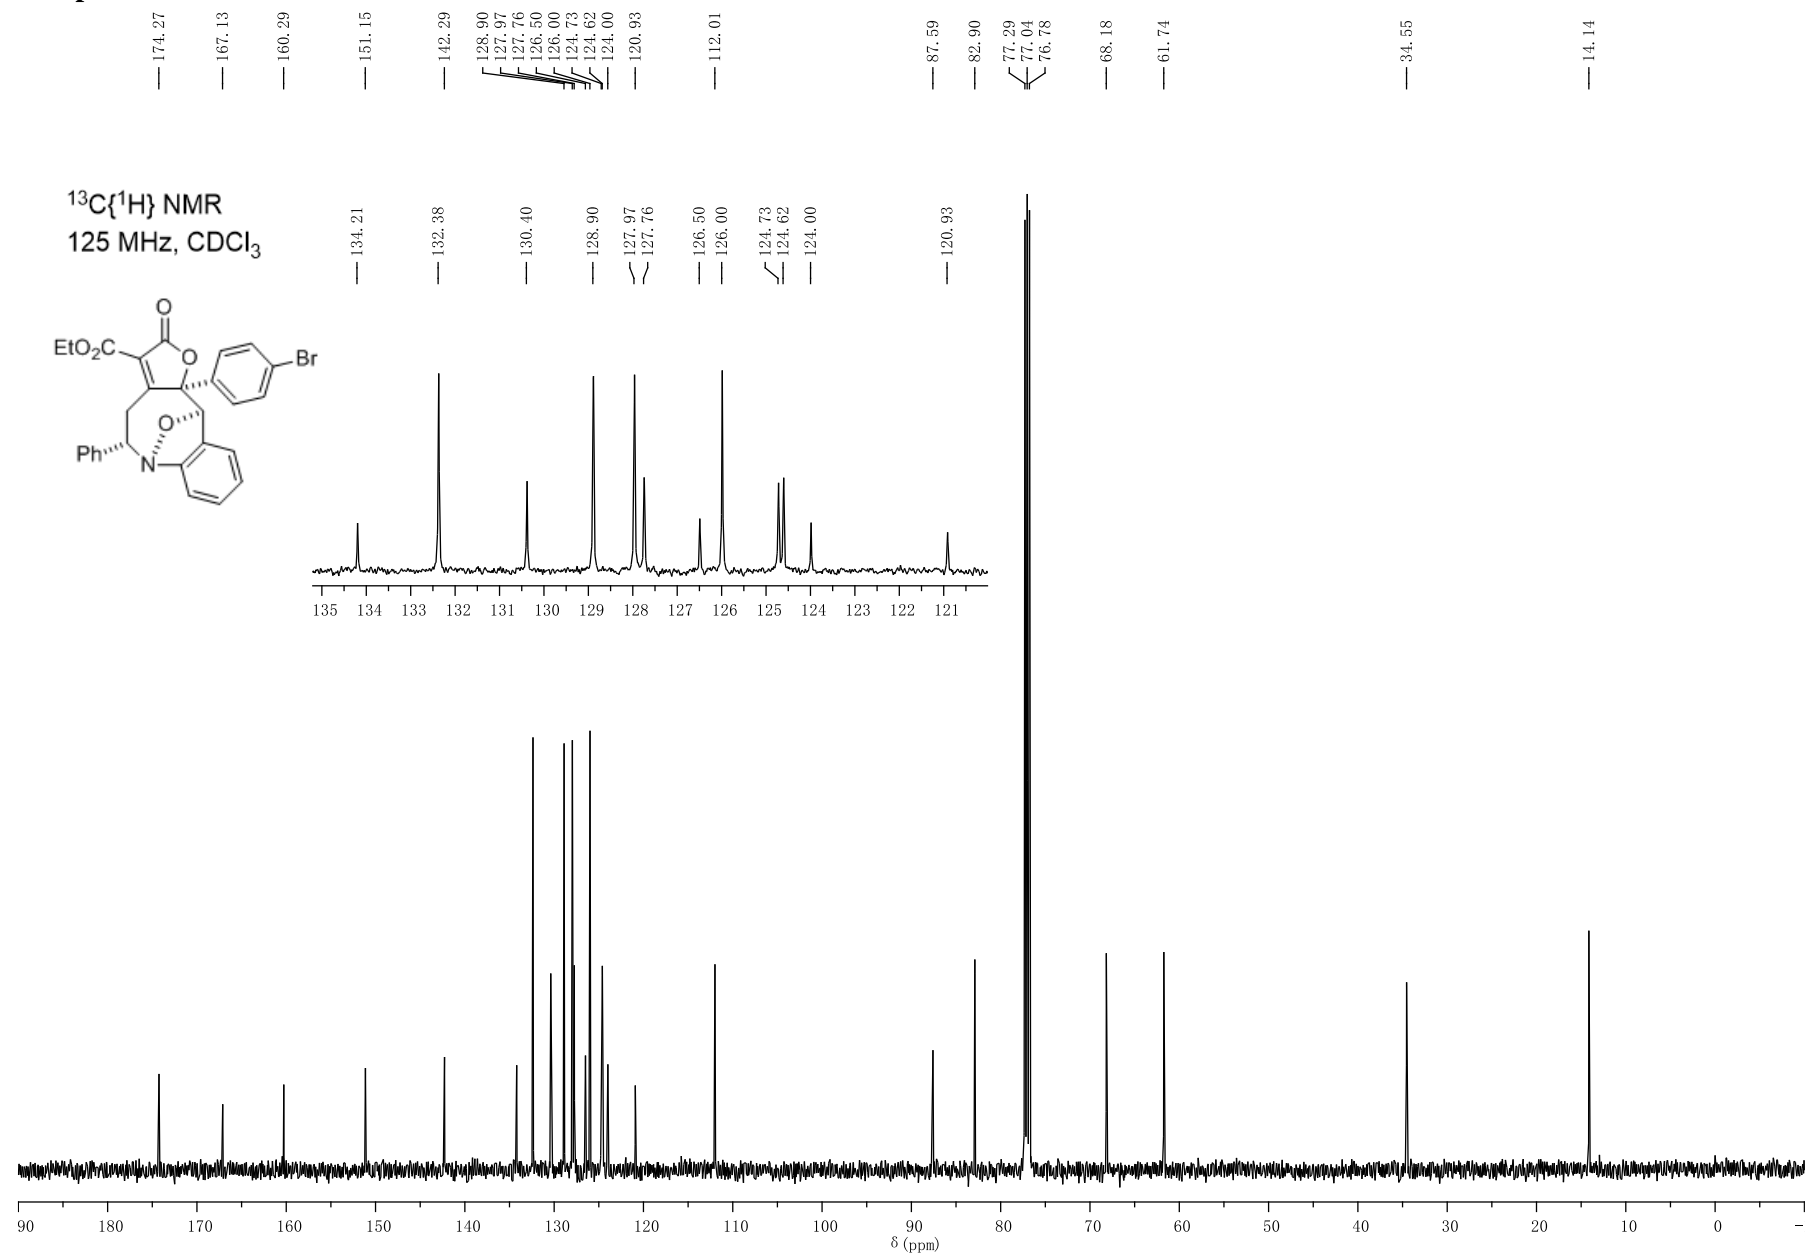

**Compound 3ga**

7.8441  
7.8278  
7.7285  
7.7120  
7.4359  
7.3421  
7.2561  
7.0896  
6.9208  
6.9048

5.9833

4.5682  
4.5570  
4.5477  
4.5388  
4.2795  
4.2651  
4.2513  
4.2370  
3.5845  
3.5733  
3.5602  
3.5490

2.9663  
2.9445  
2.9212

1.6313  
1.3435  
1.3293  
1.3151

0.0039

<sup>1</sup>H NMR  
500 MHz, CDCl<sub>3</sub>

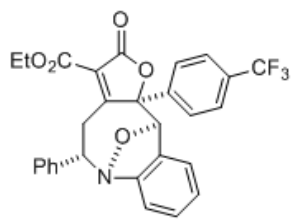

7.8441  
7.8278  
7.7285  
7.7120  
7.5444  
7.5294  
7.4359  
7.4210  
7.4059  
7.3421  
7.3238  
7.3090  
7.2561  
7.1193  
7.1045  
7.0896  
6.9208  
6.9048

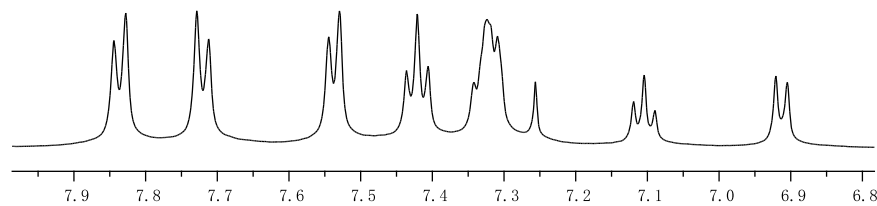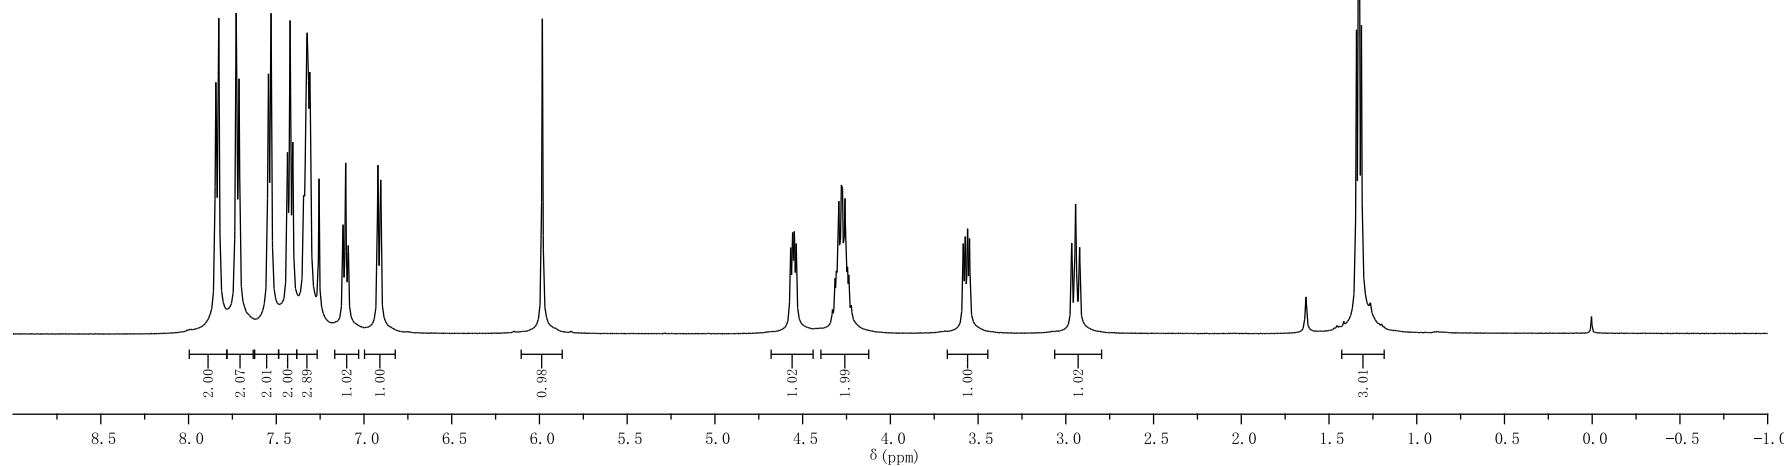



# Compound 3ga

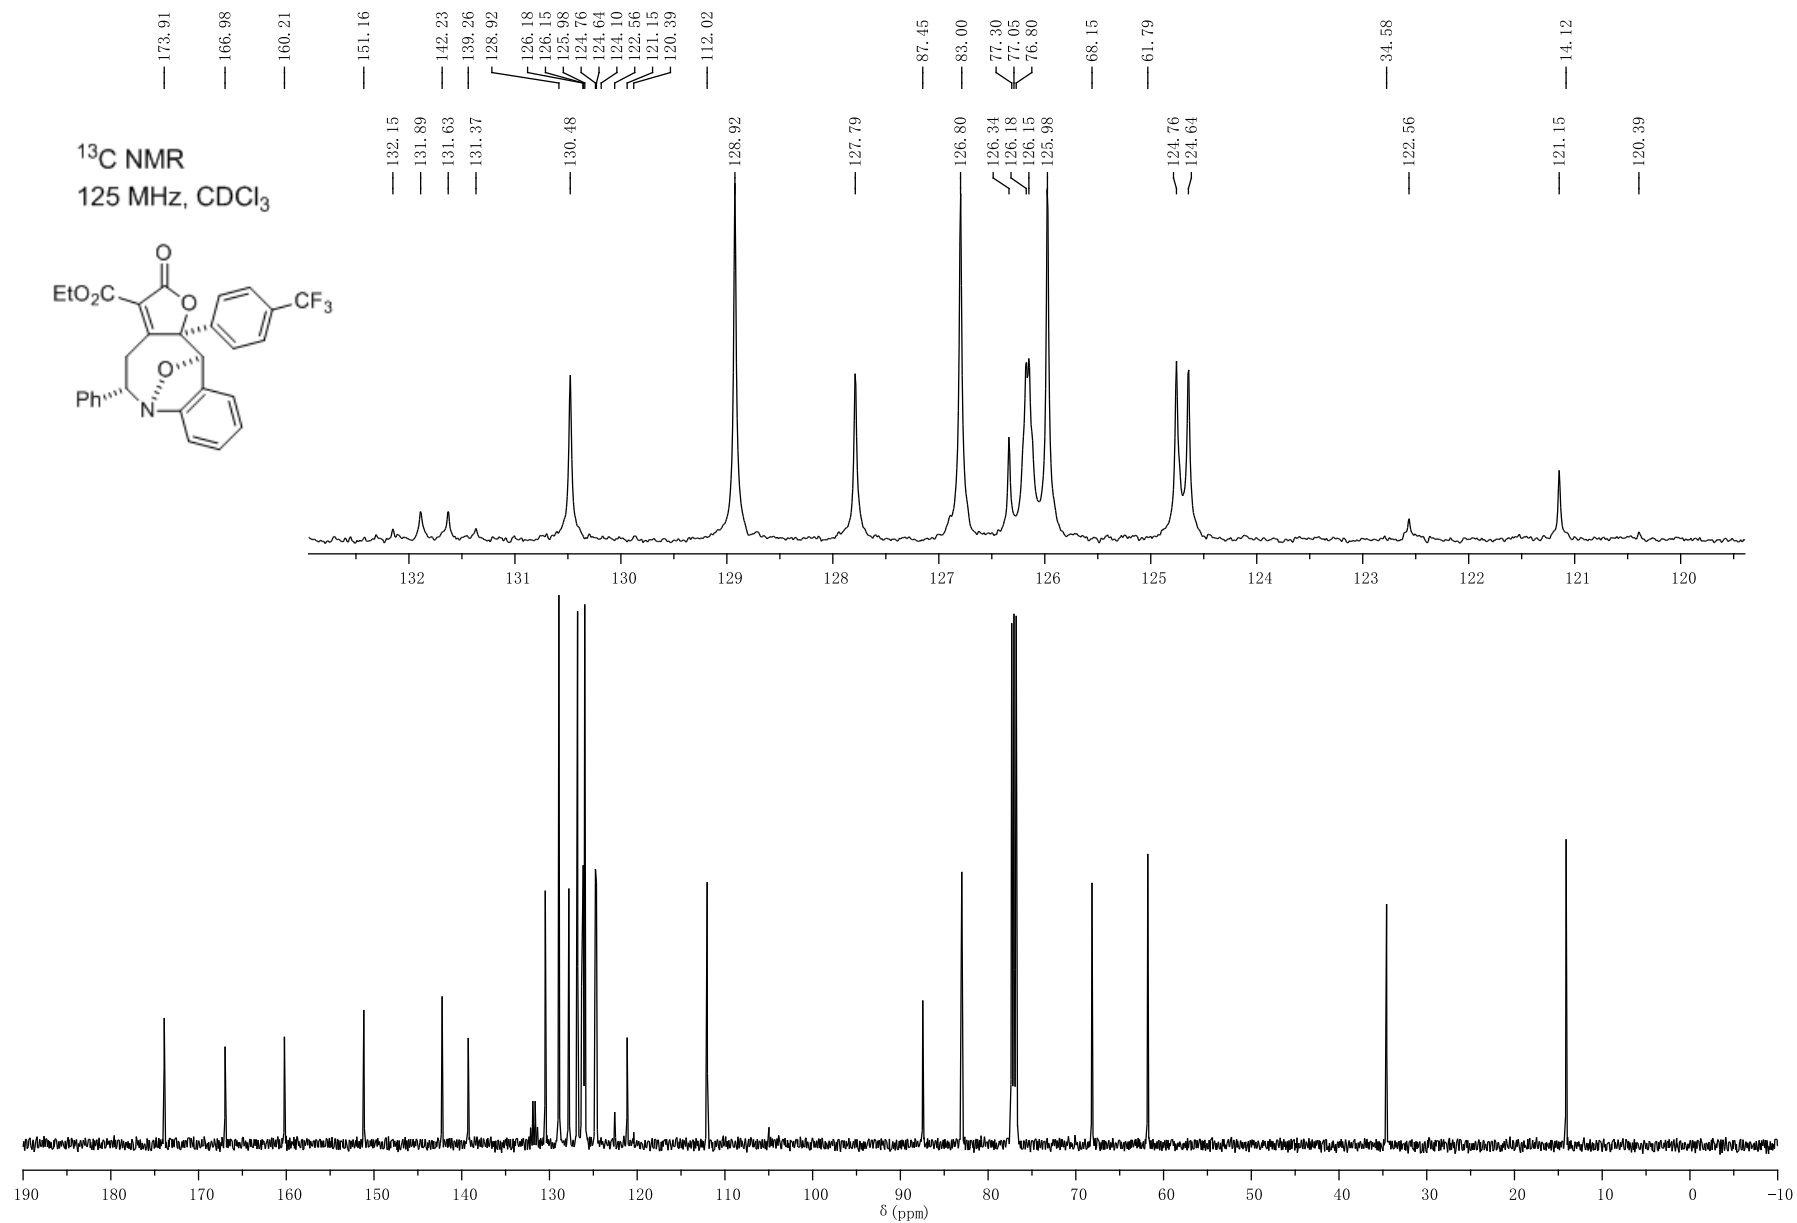

**Compound 3ga**

<sup>19</sup>F NMR  
470 MHz, CDCl<sub>3</sub>

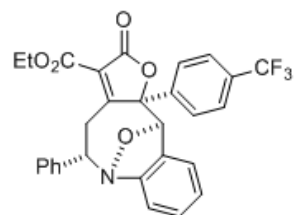

— -62.90

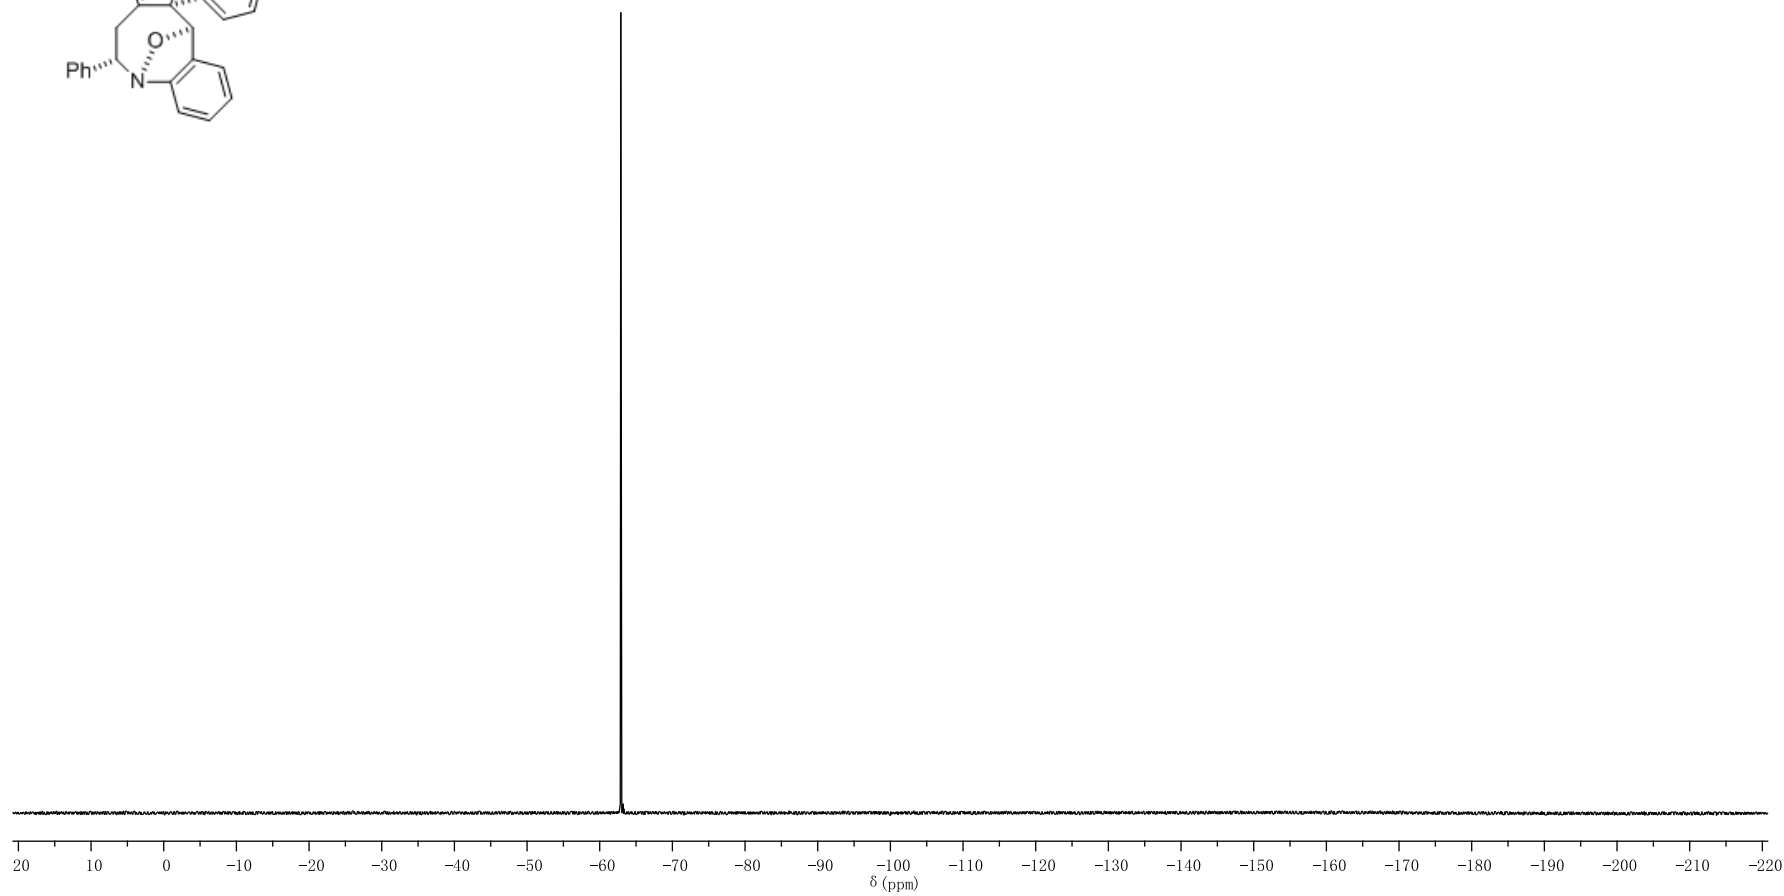

**Compound 3ha**

7.534  
7.517  
7.420  
7.416  
7.405  
7.389  
7.324  
7.312  
7.296  
7.281  
7.279  
7.263  
7.247

7.074  
6.903  
6.887

6.009

4.526  
4.515  
4.505  
4.494

4.287  
4.264  
4.243  
4.214

3.540  
3.528  
3.516  
3.504

3.010  
2.989  
2.986  
2.965

2.370

1.581  
1.342  
1.327  
1.313

0.004

7.534  
7.517  
7.420  
7.416  
7.405  
7.389  
7.324  
7.312  
7.296  
7.281  
7.279  
7.263  
7.247  
7.106  
7.104  
7.091  
7.089  
7.076  
7.074  
6.903  
6.887

<sup>1</sup>H NMR  
500 MHz, CDCl<sub>3</sub>

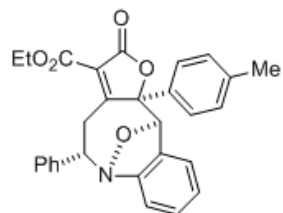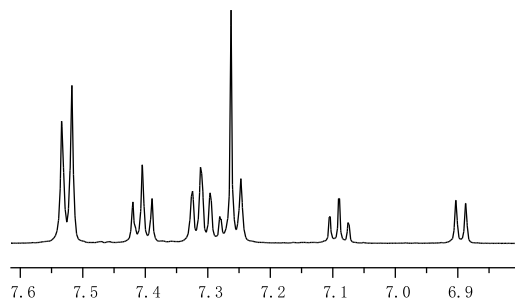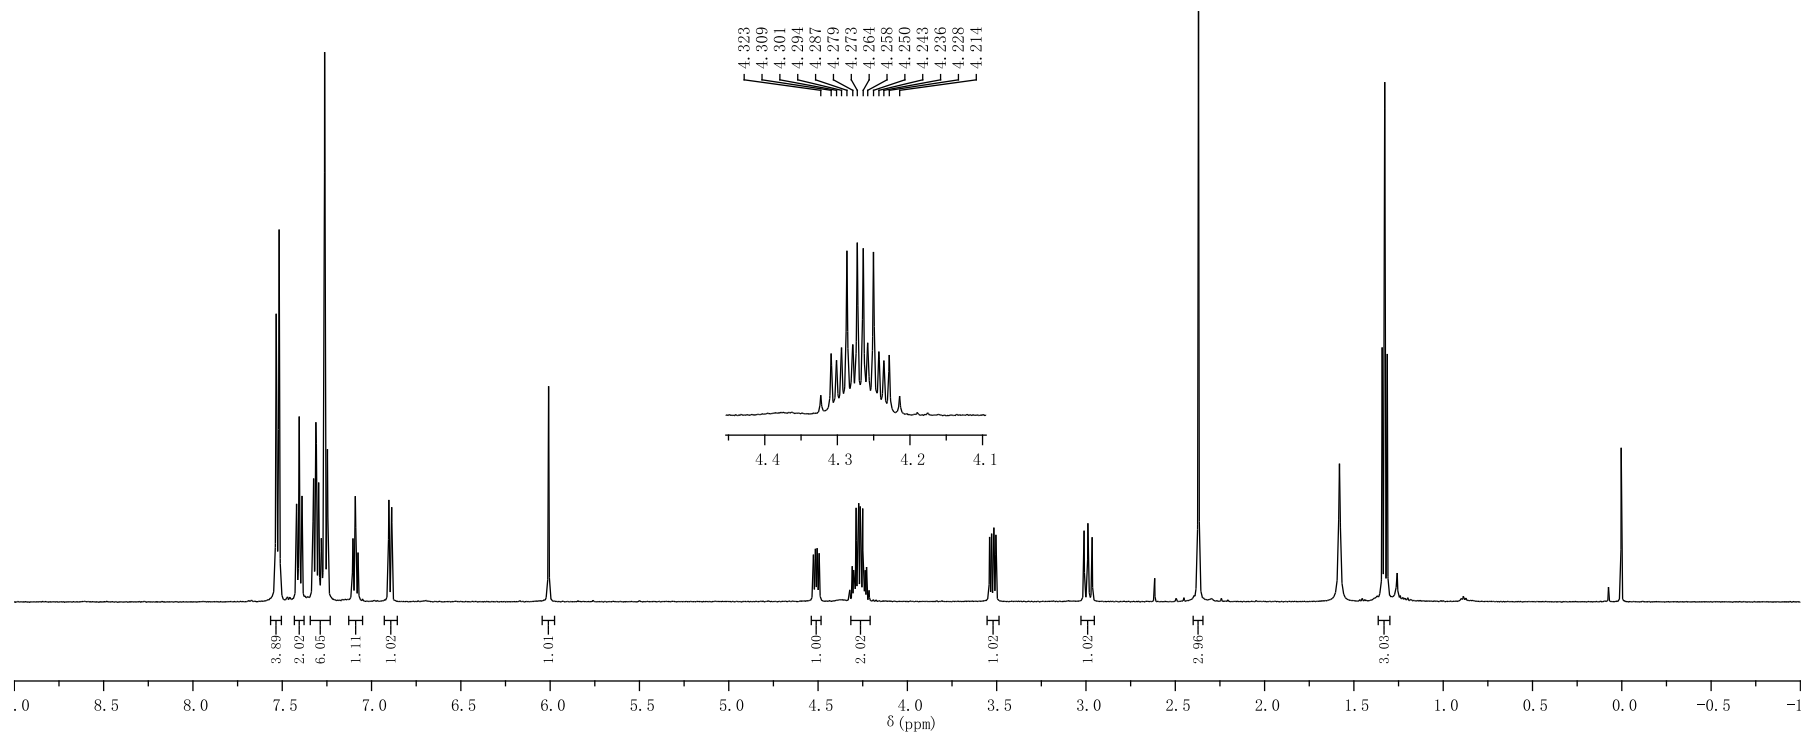

# Compound 3ha

$^{13}\text{C}\{^1\text{H}\}$  NMR  
125 MHz,  $\text{CDCl}_3$

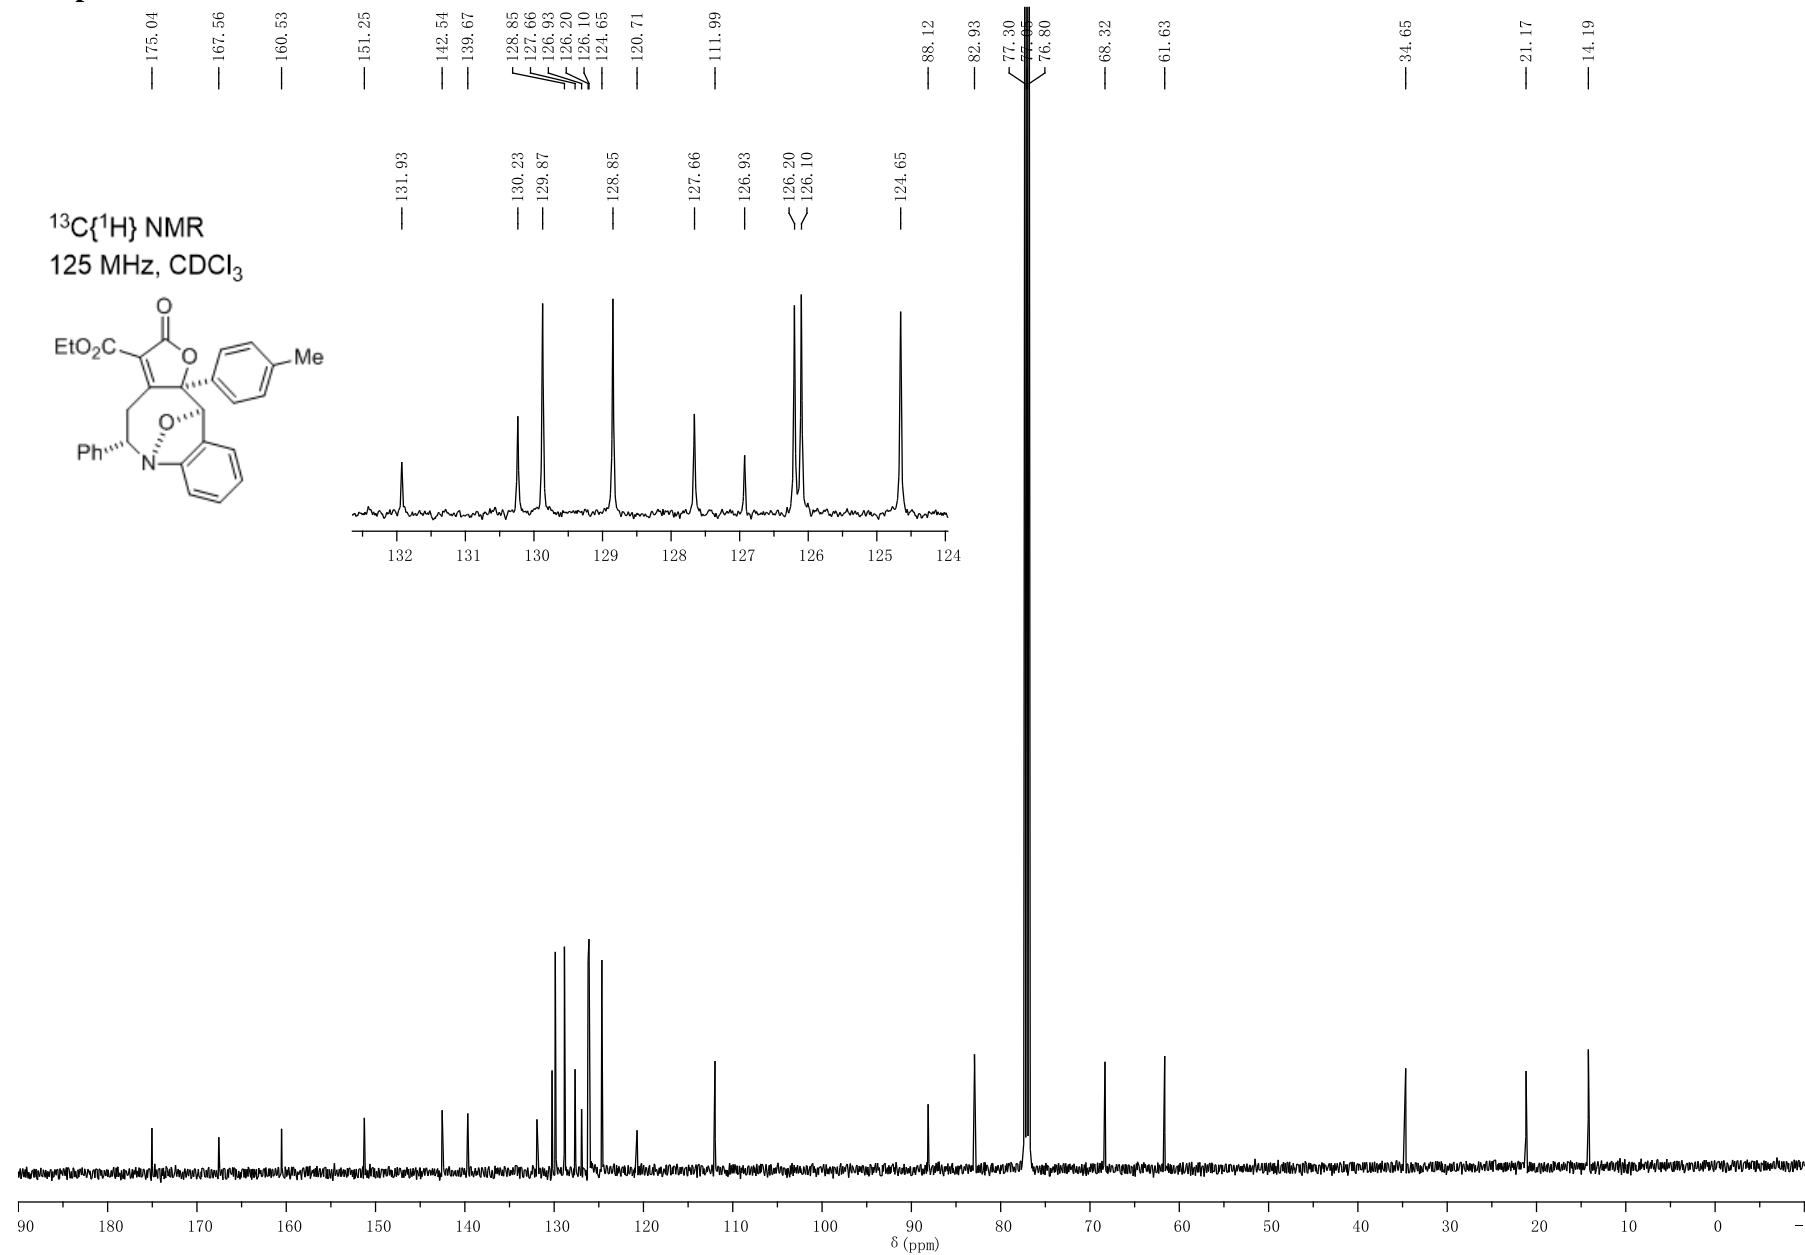

**Compound 3ia**

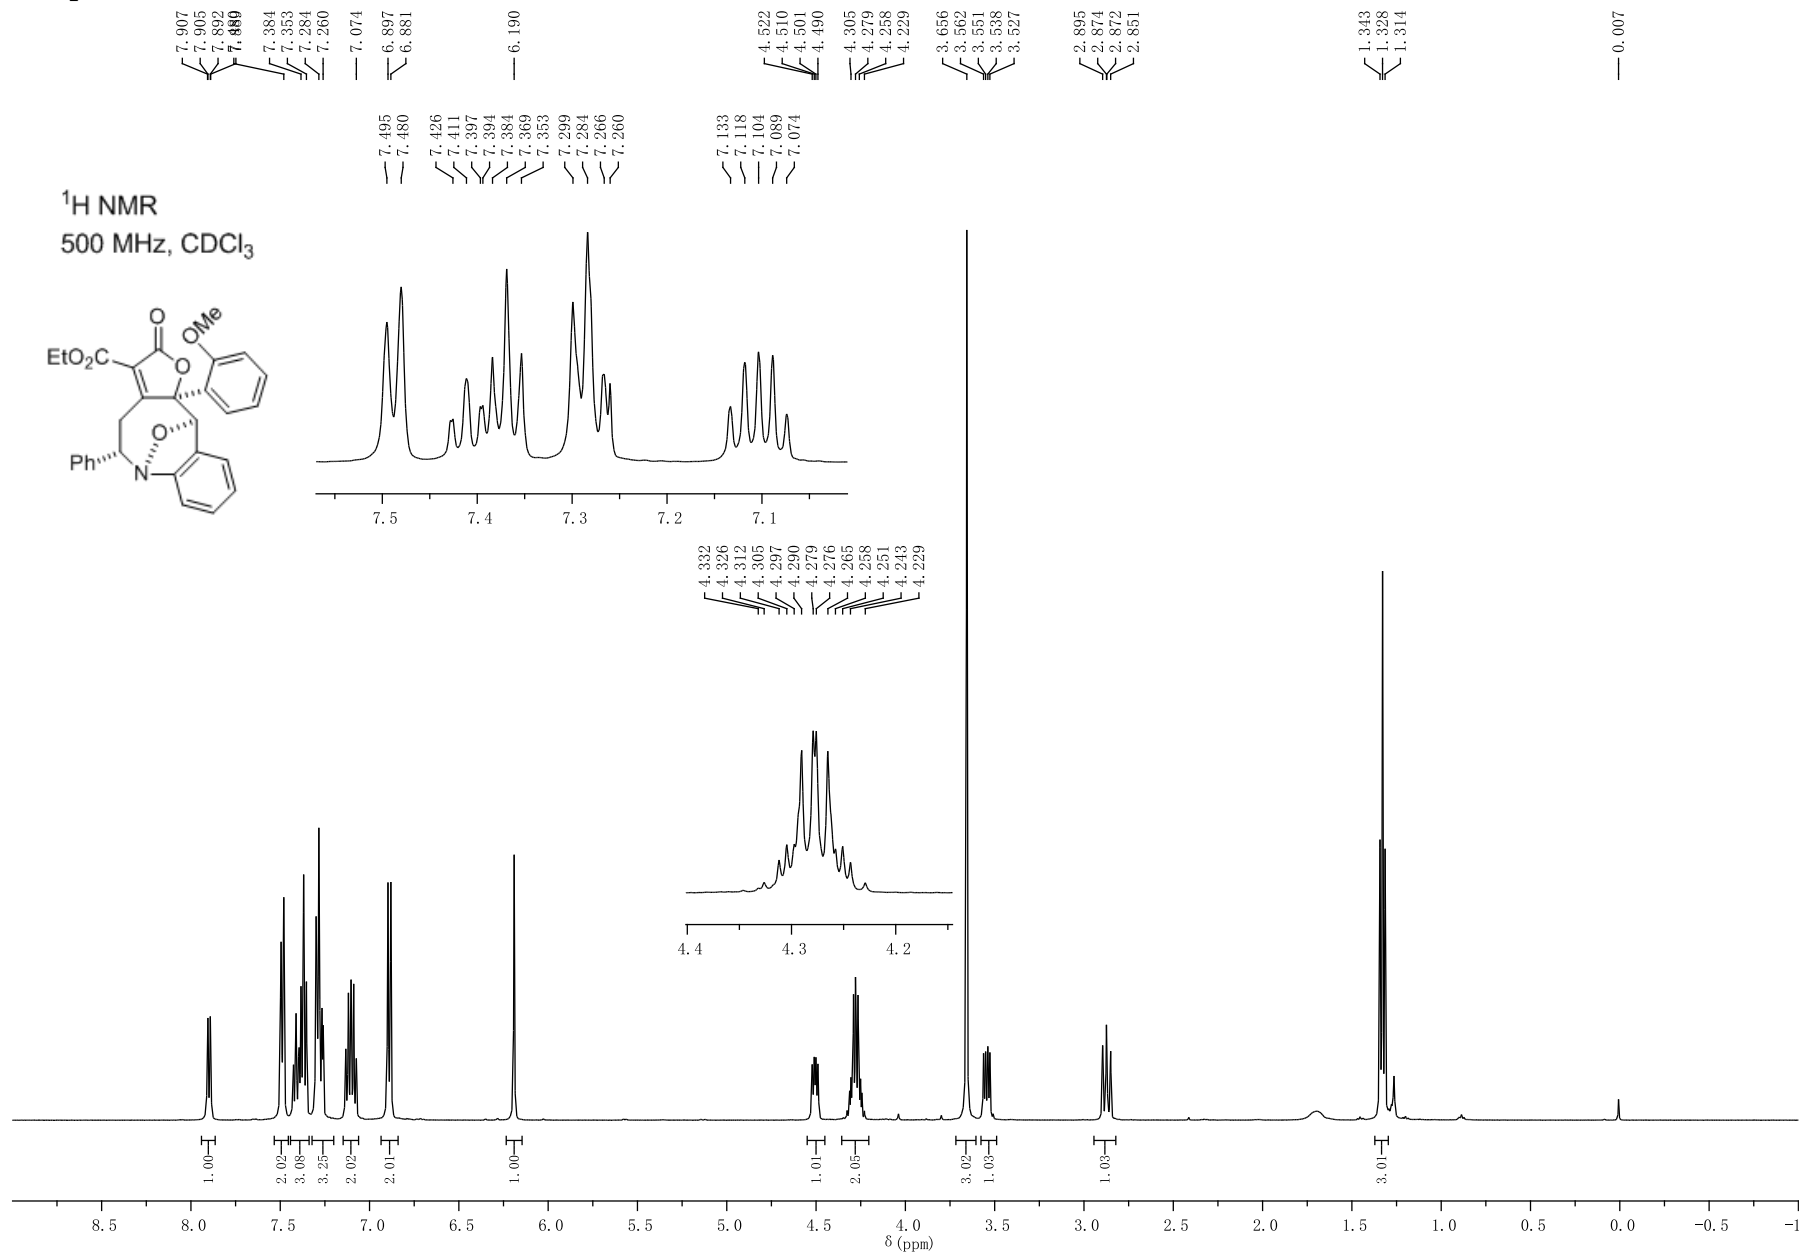

# Compound 3ia

$^{13}\text{C}\{^1\text{H}\}$  NMR  
125 MHz,  $\text{CDCl}_3$

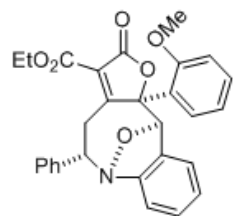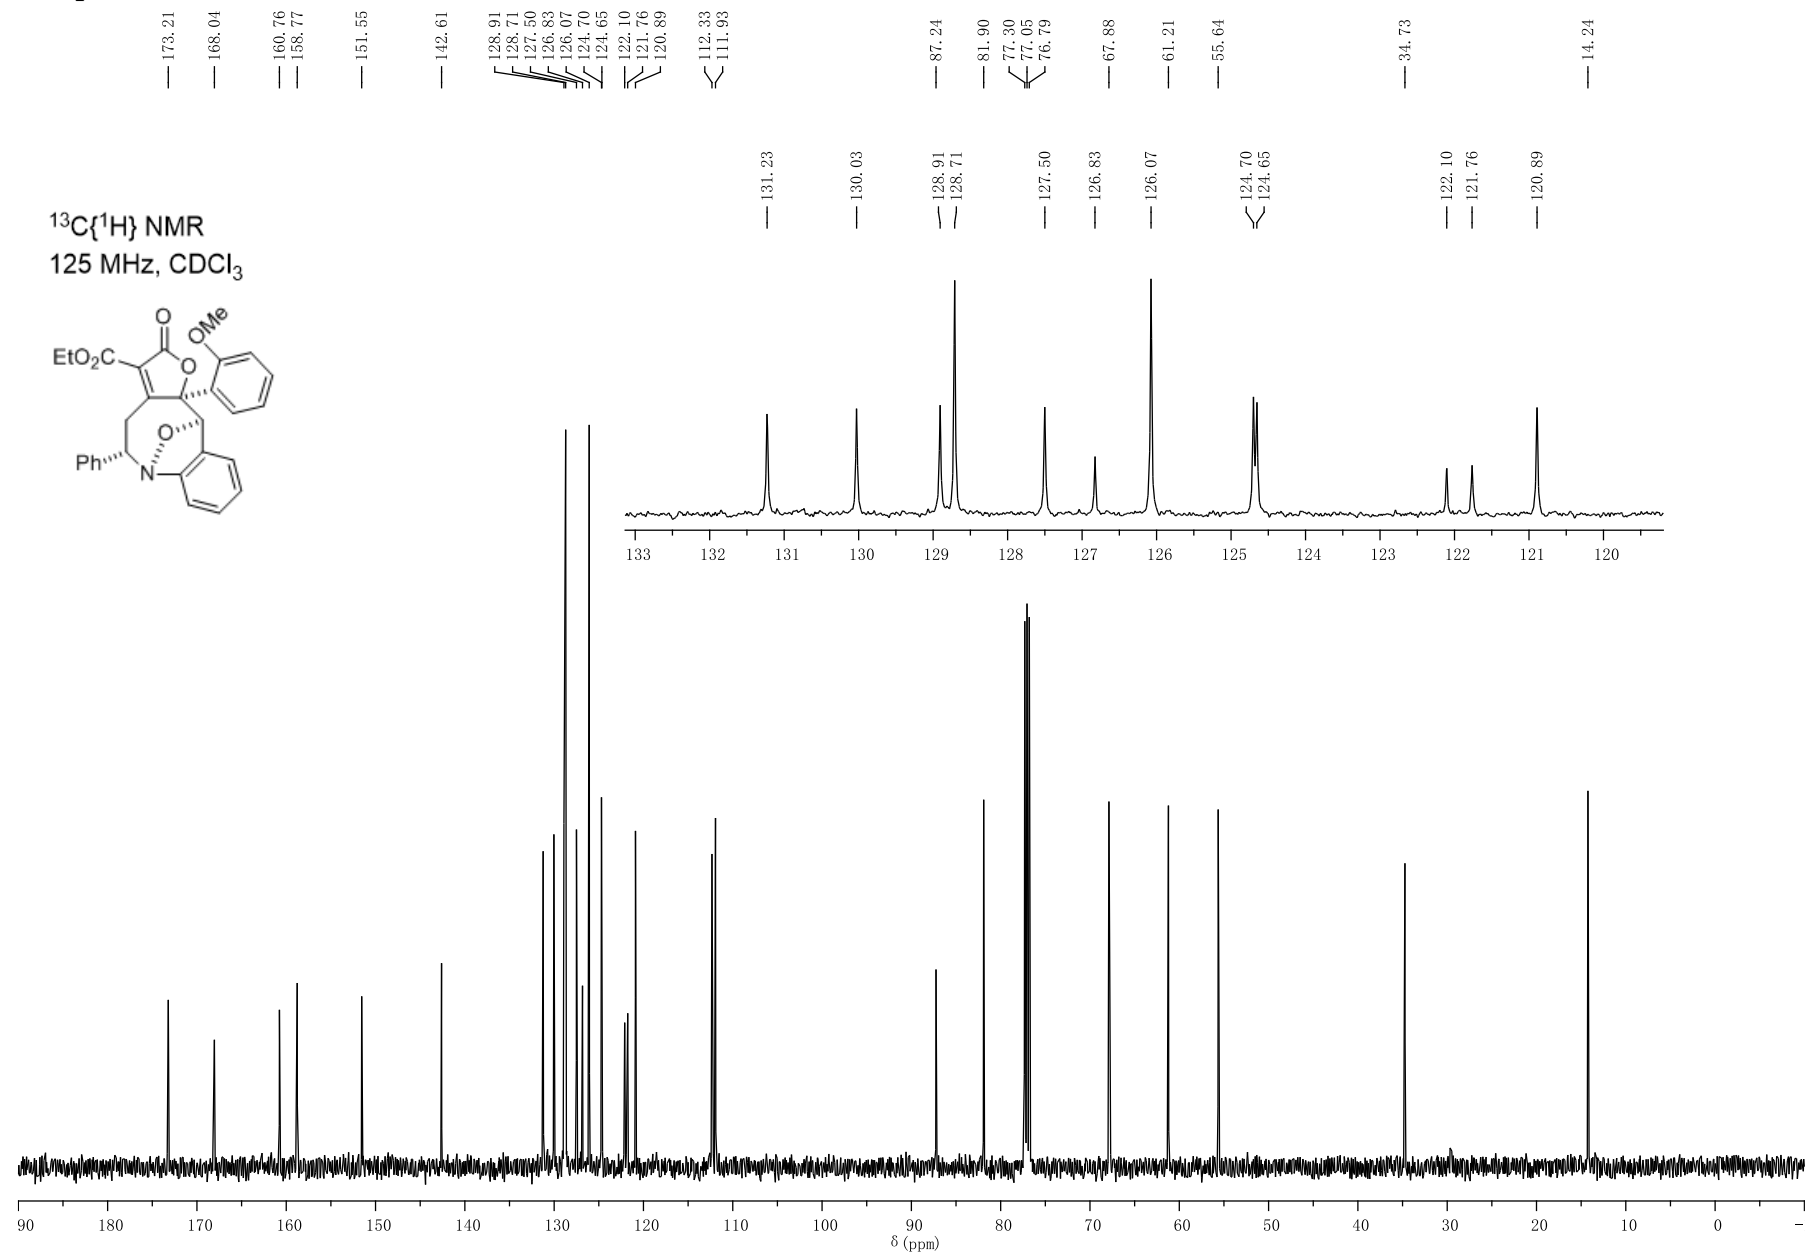

**Compound 3ja**

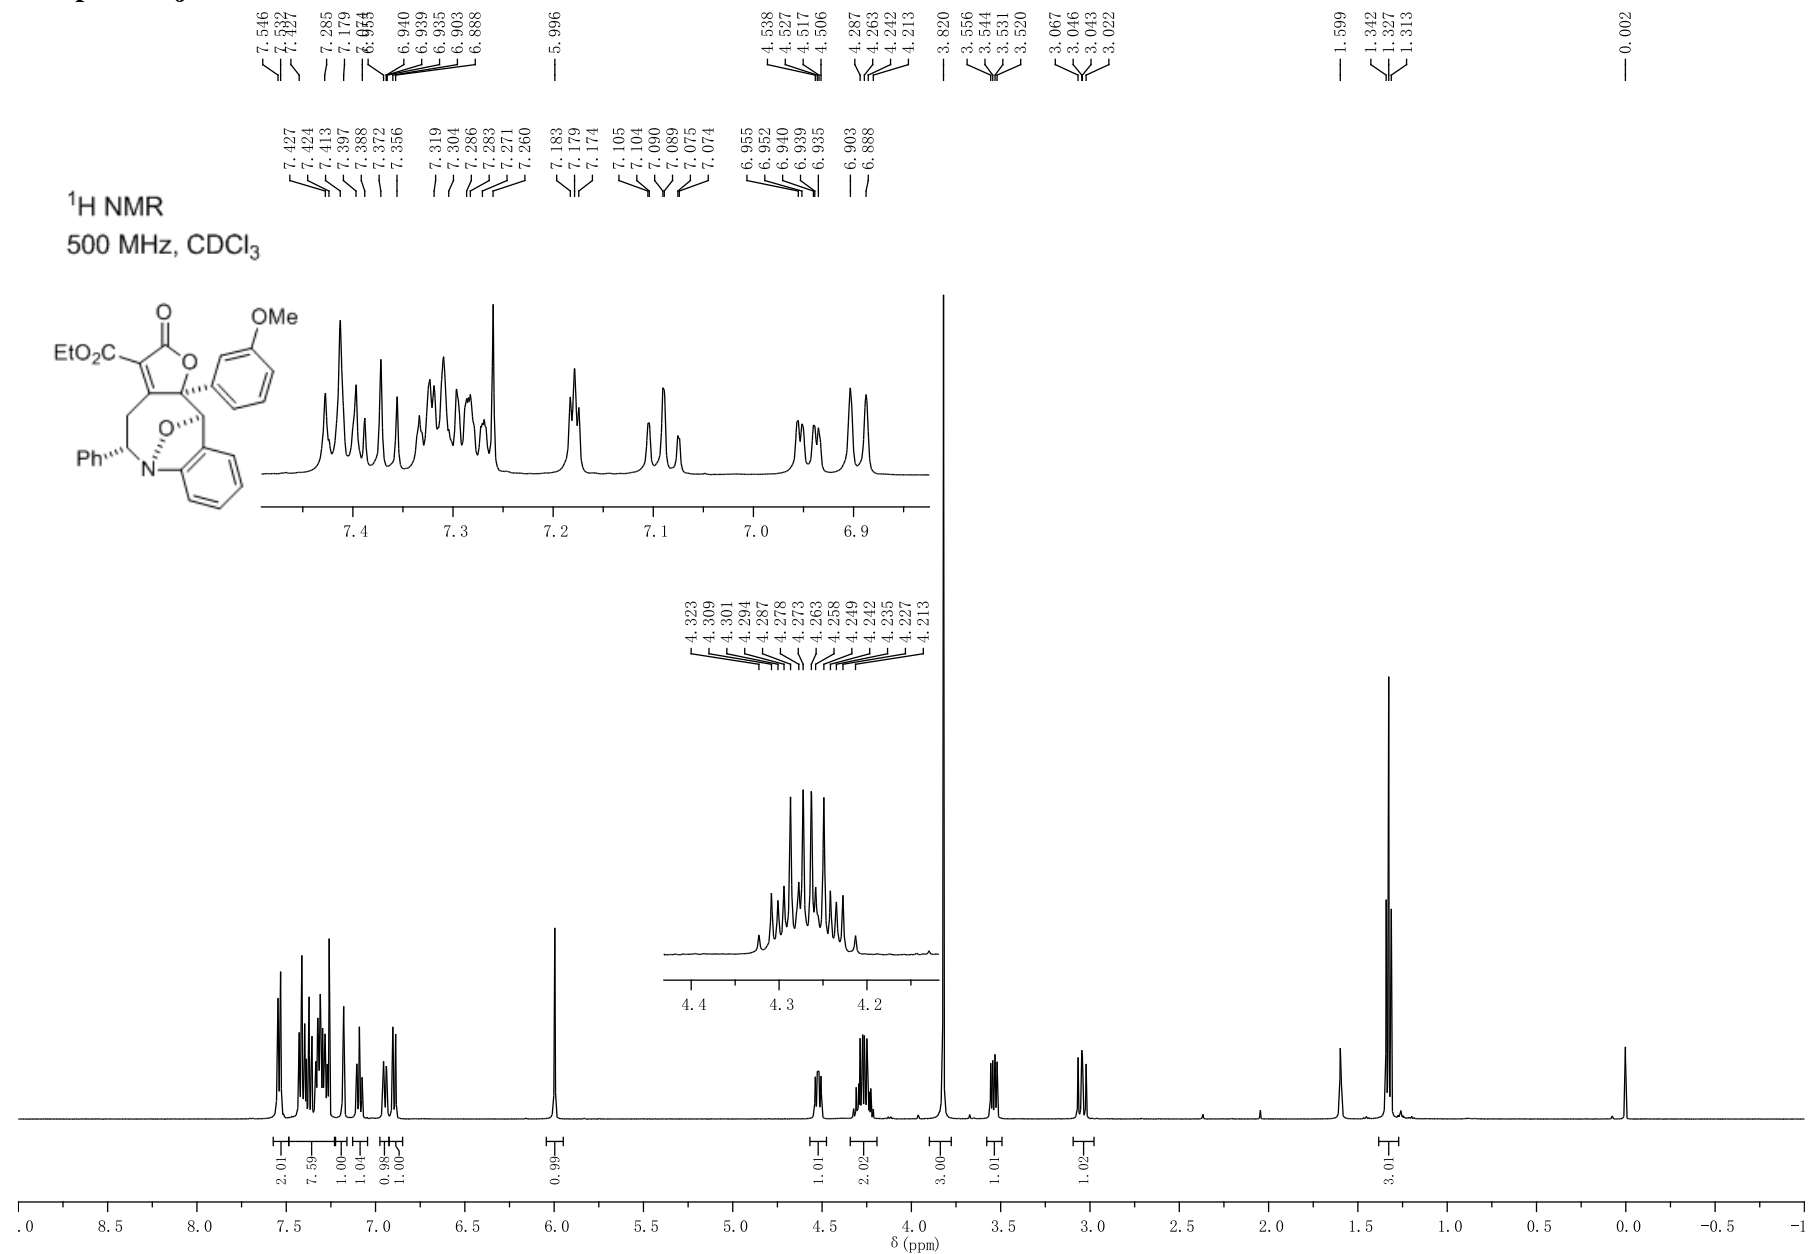

# Compound 3ja

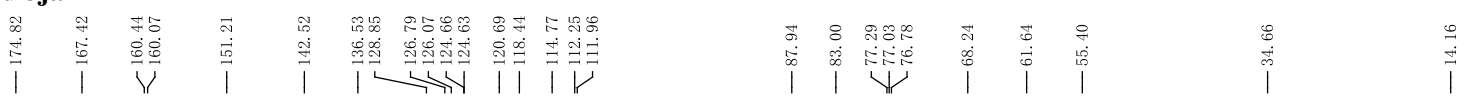

$^{13}\text{C}\{^1\text{H}\}$  NMR  
125 MHz,  $\text{CDCl}_3$

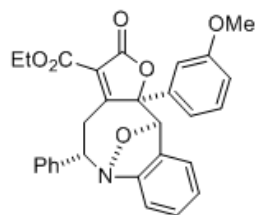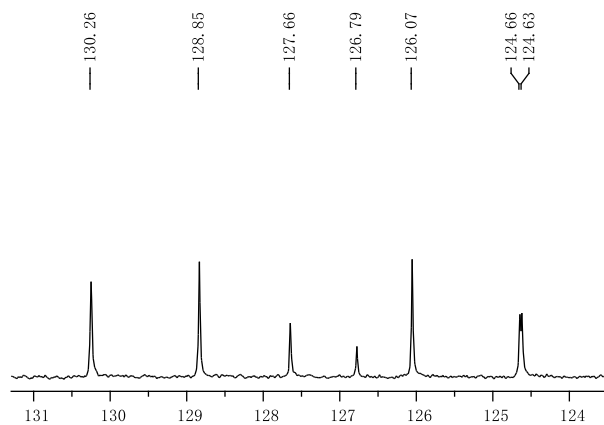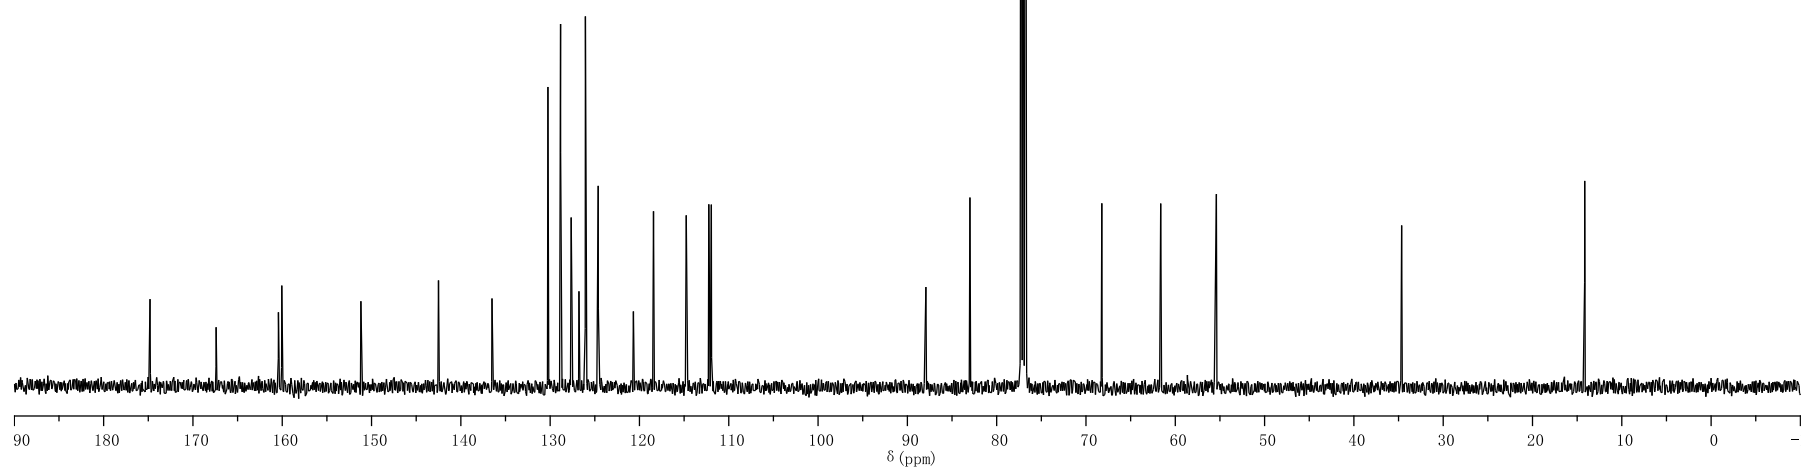



# Compound 3ka

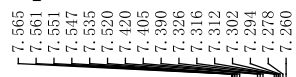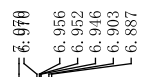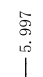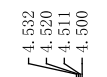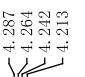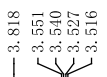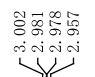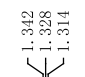

<sup>1</sup>H NMR  
500 MHz, CDCl<sub>3</sub>

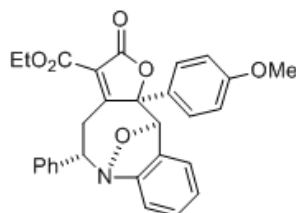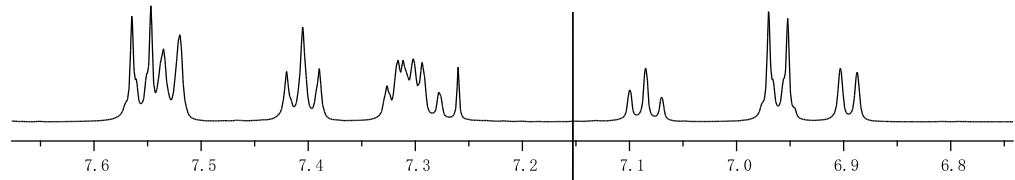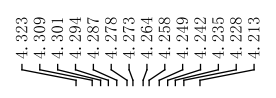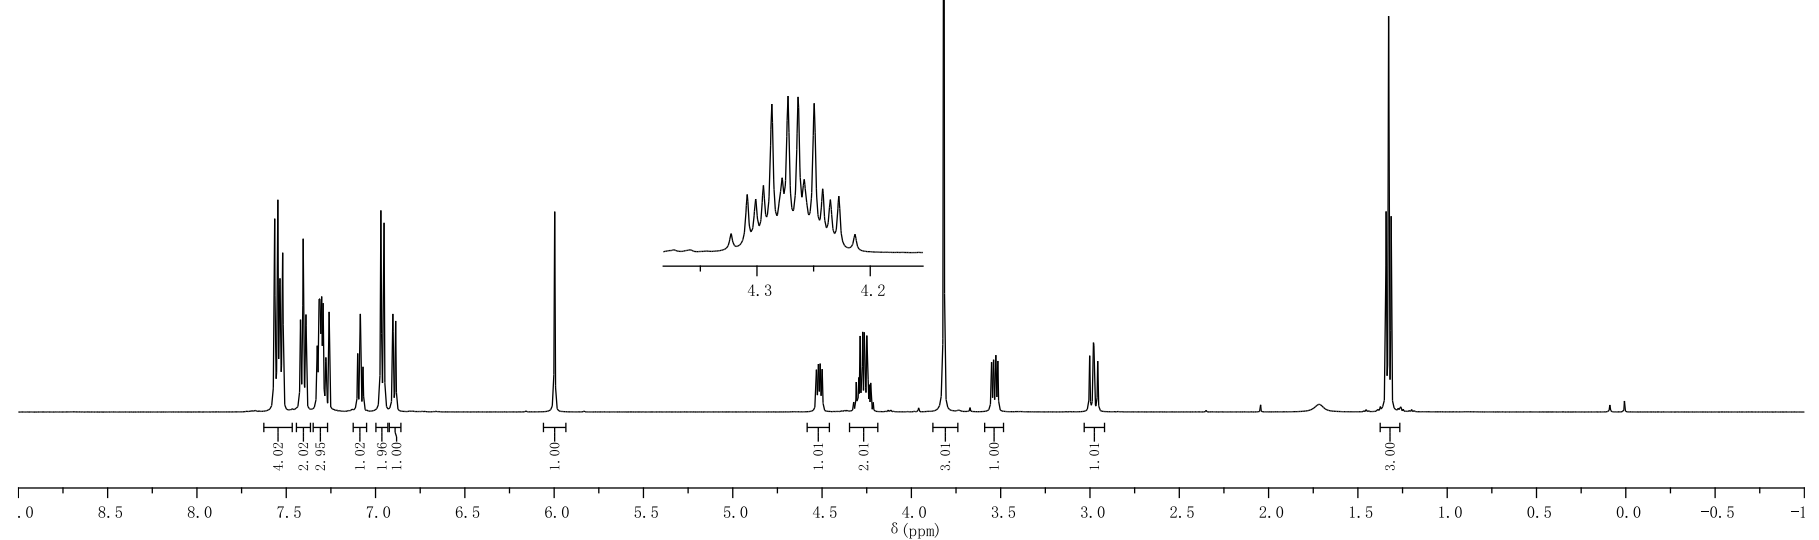

# Compound 3ka

$^{13}\text{C}\{^1\text{H}\}$  NMR  
125 MHz,  $\text{CDCl}_3$

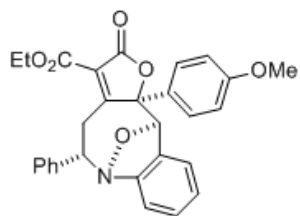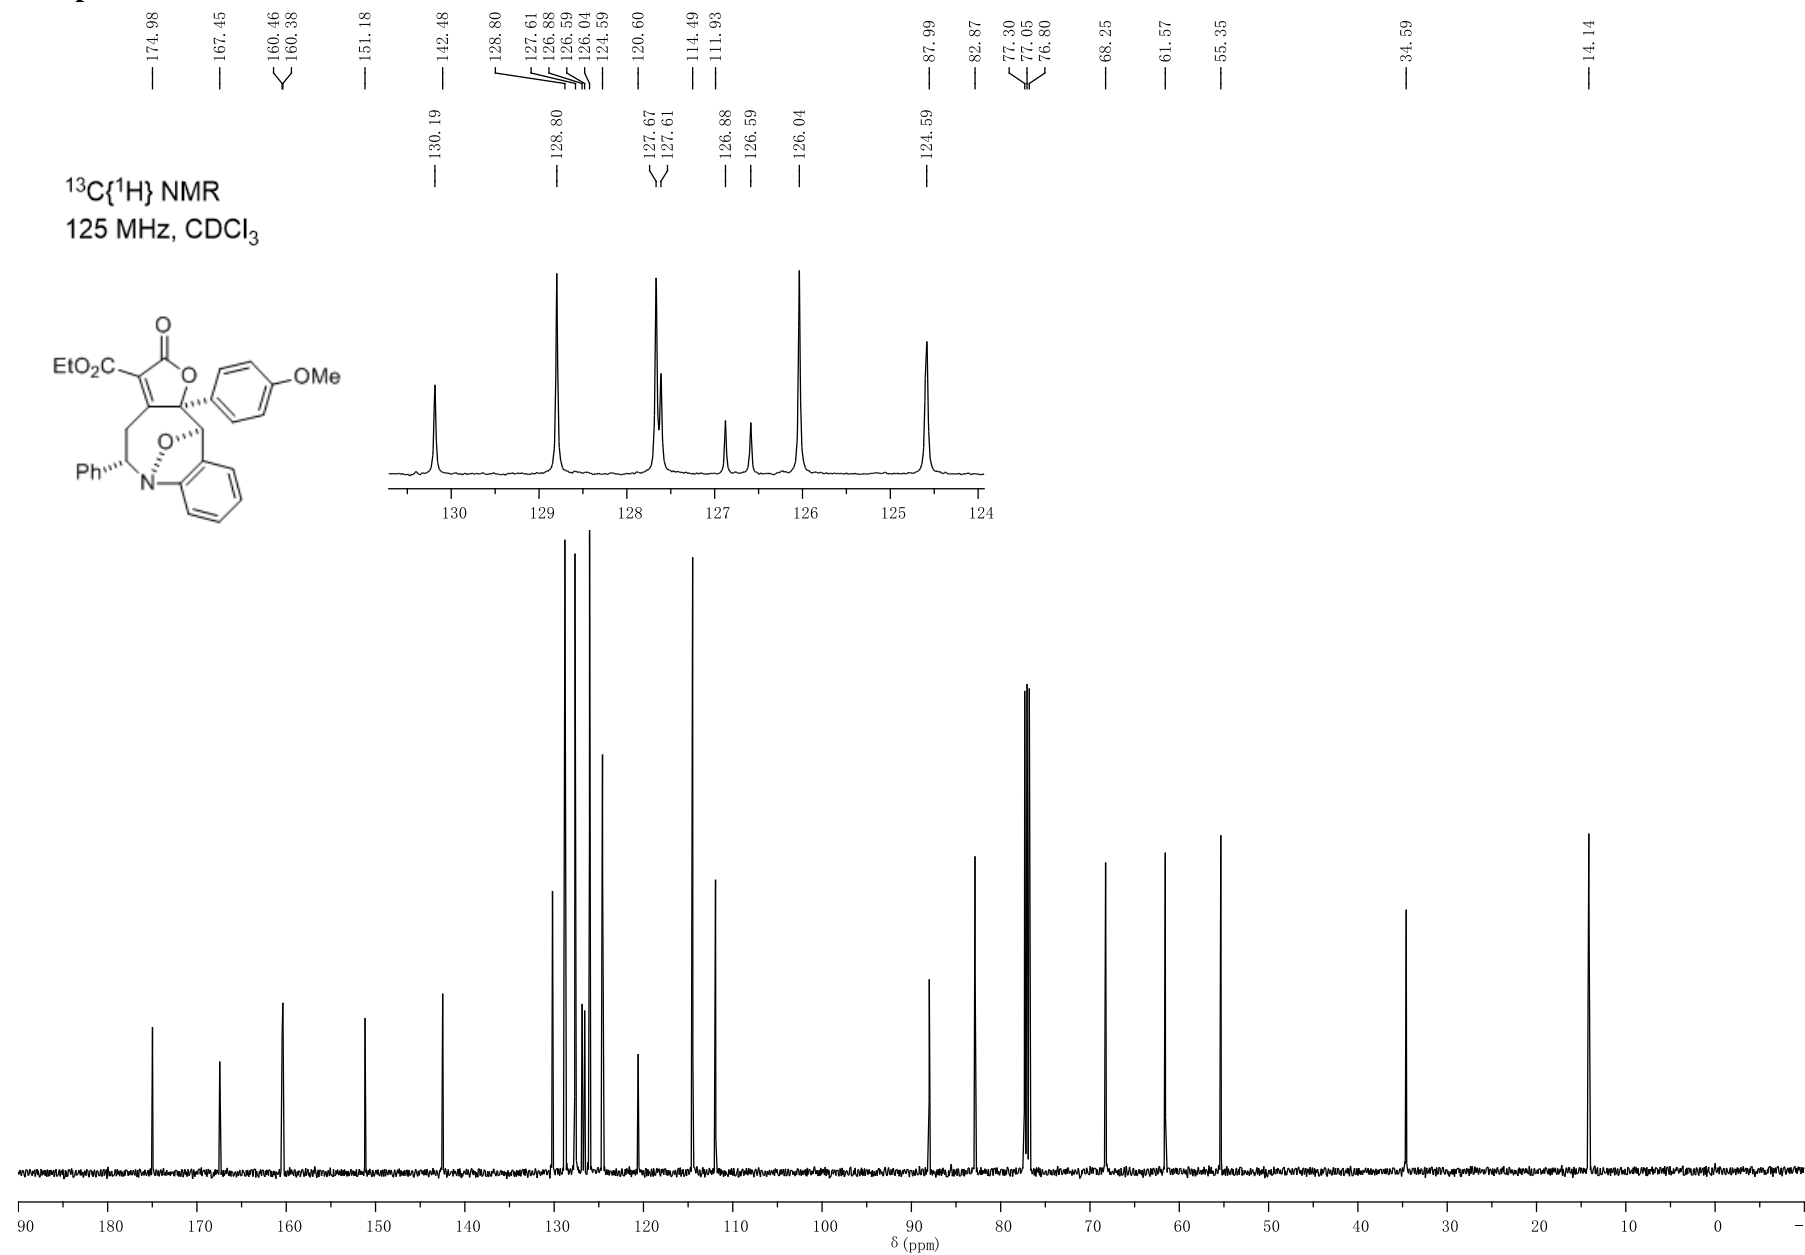

**Compound 3la**

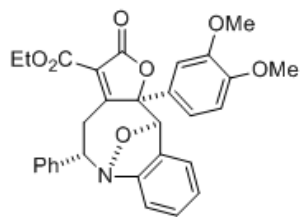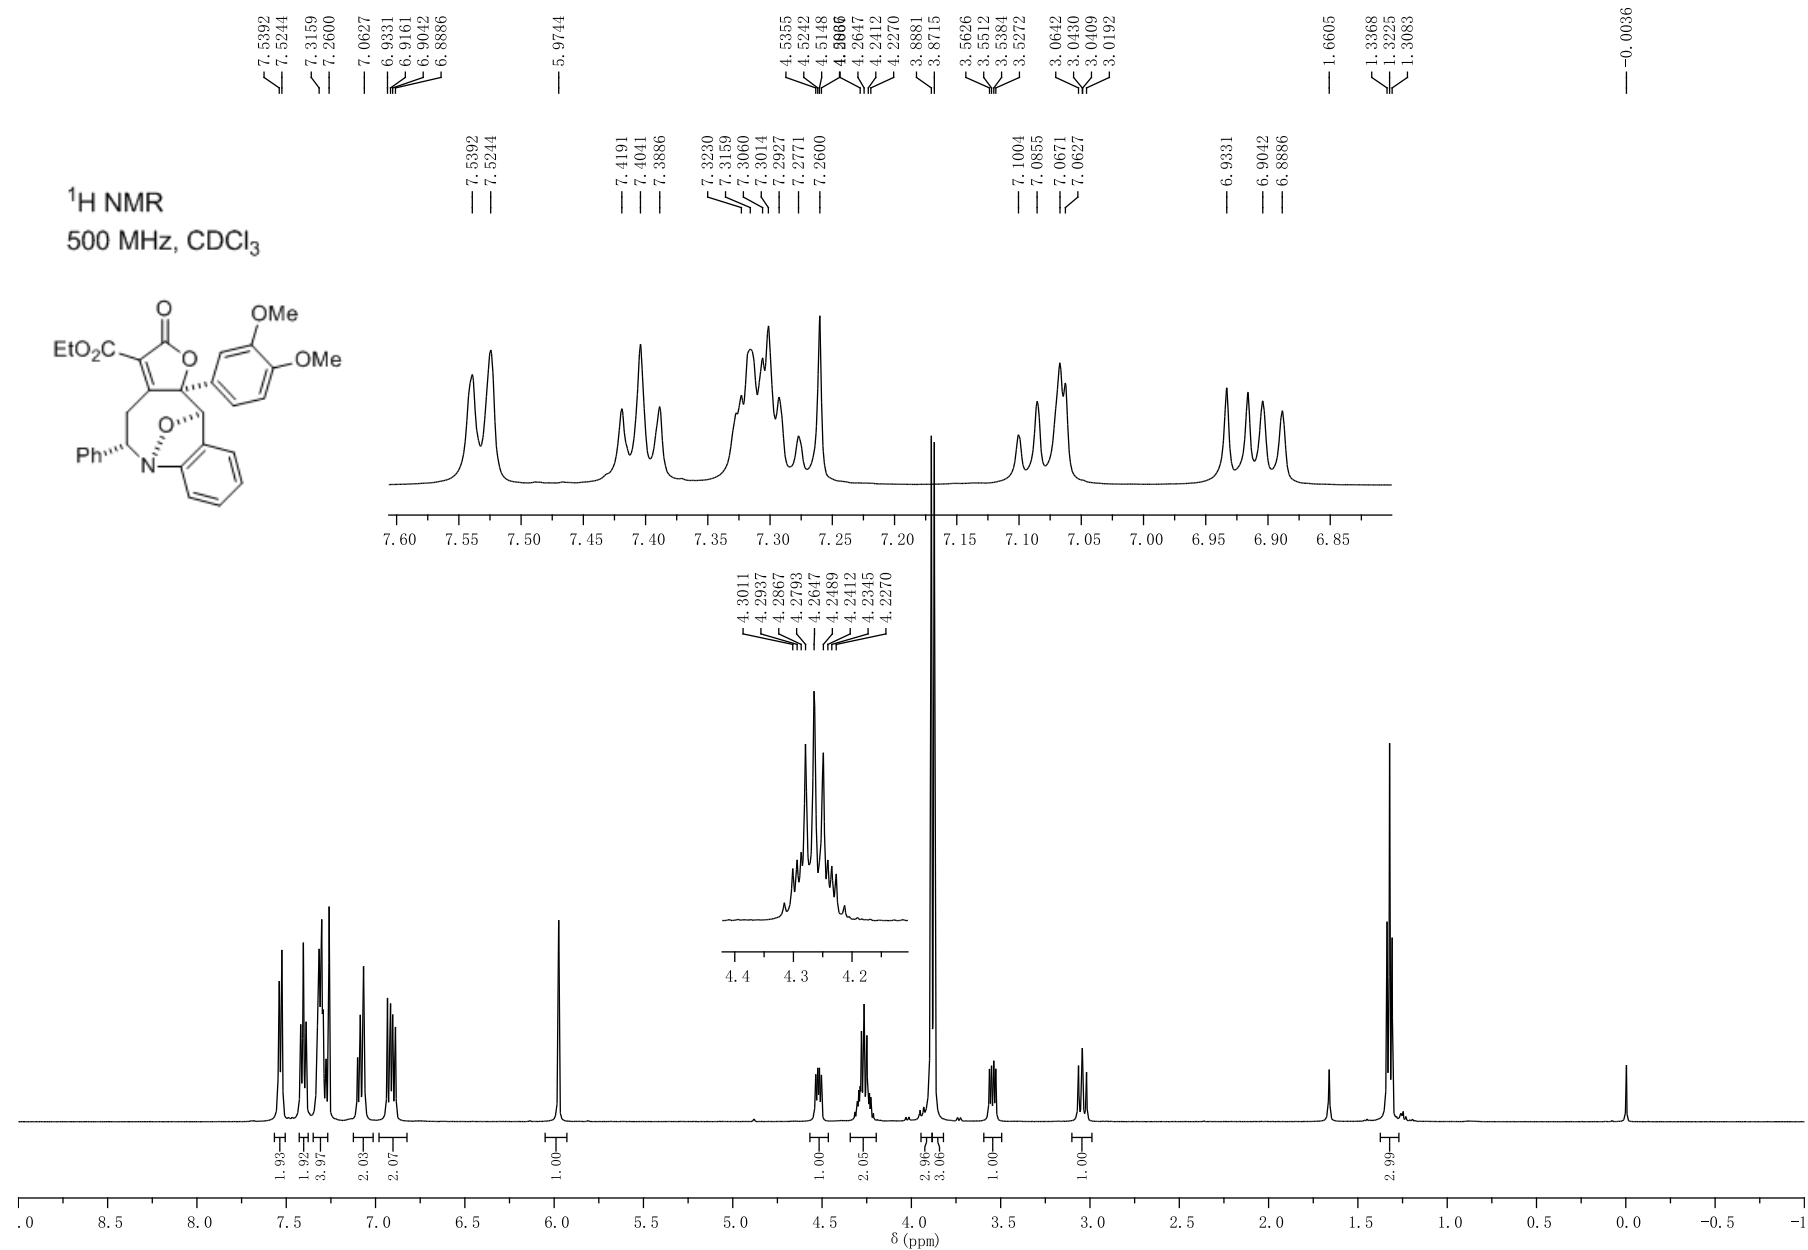

### Compound 3la

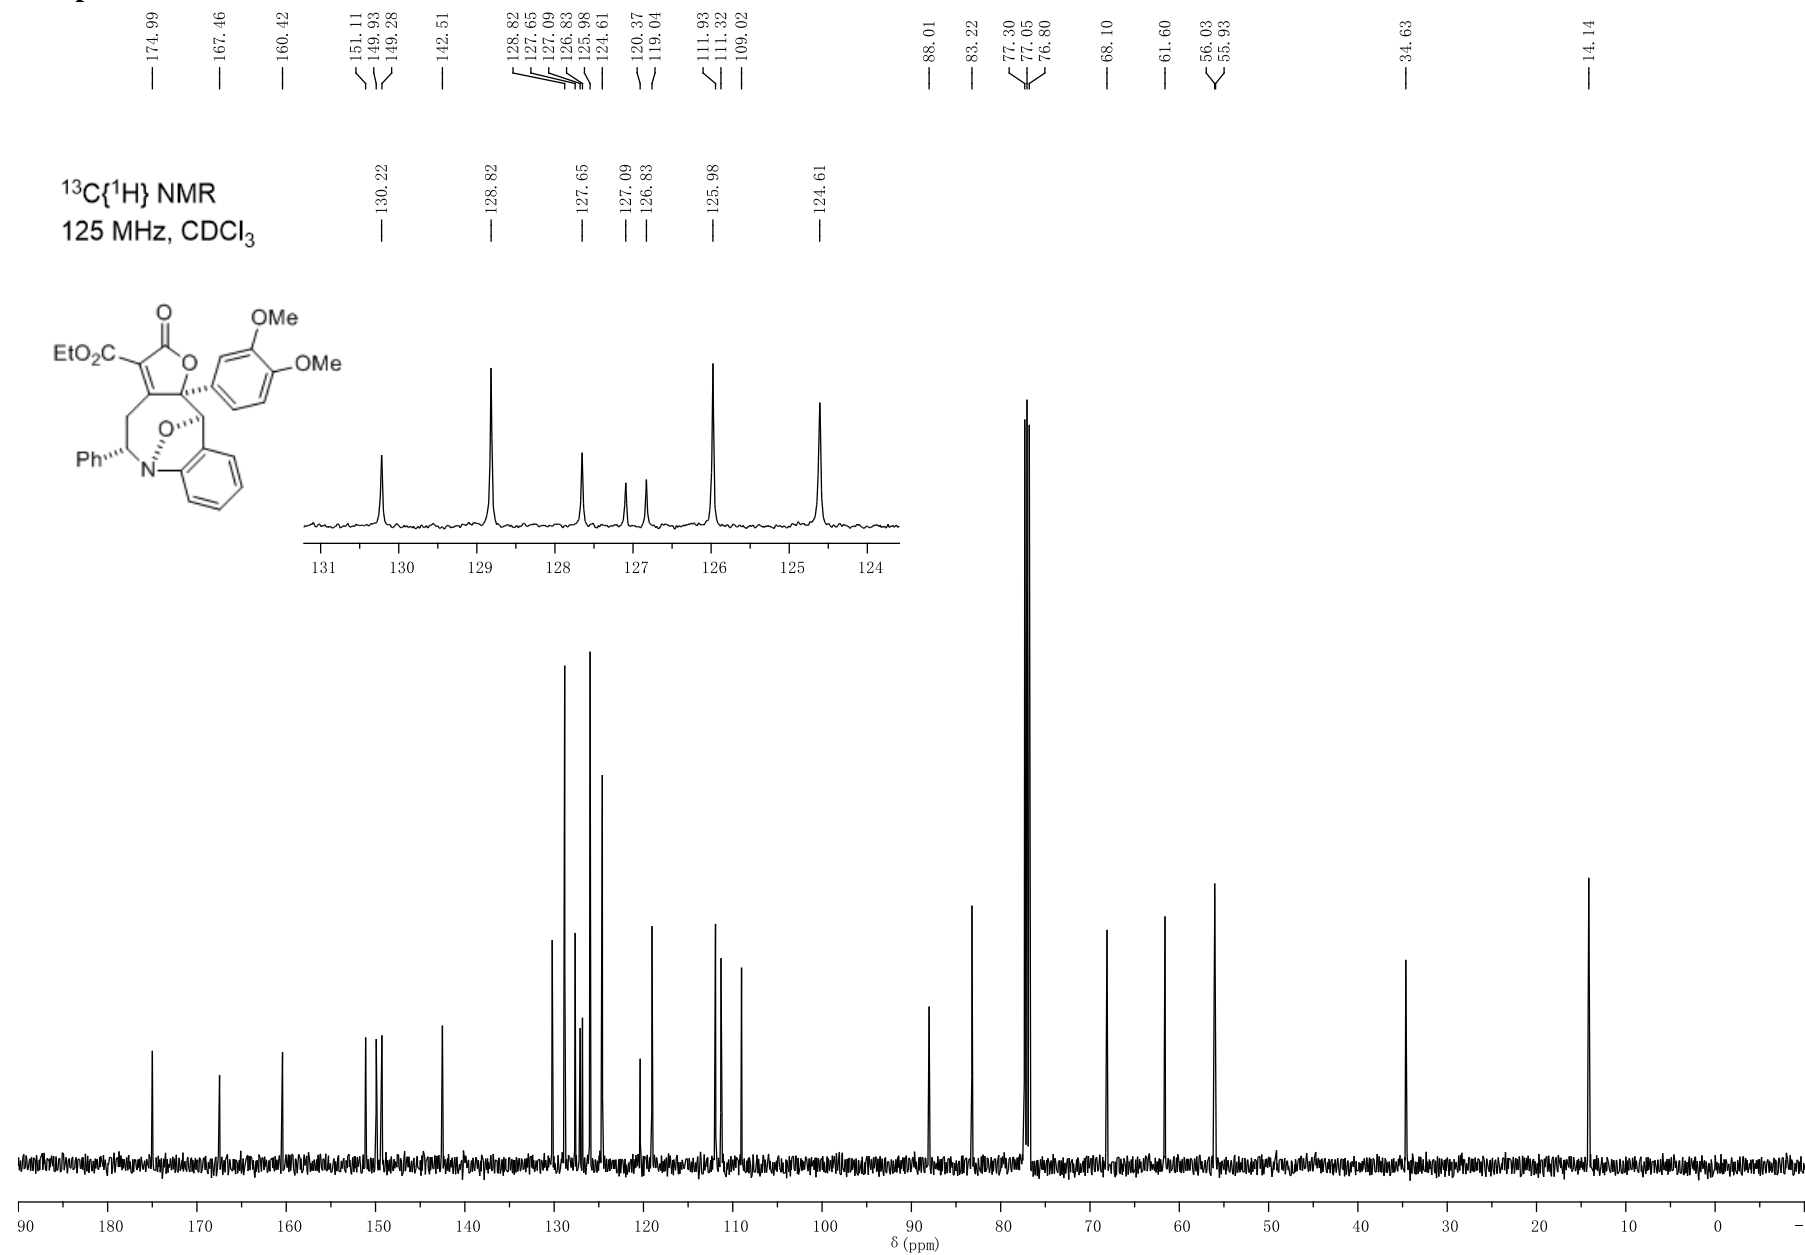

# Compound 3ma

<sup>1</sup>H NMR  
500 MHz, CDCl<sub>3</sub>

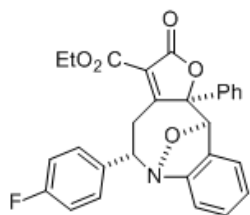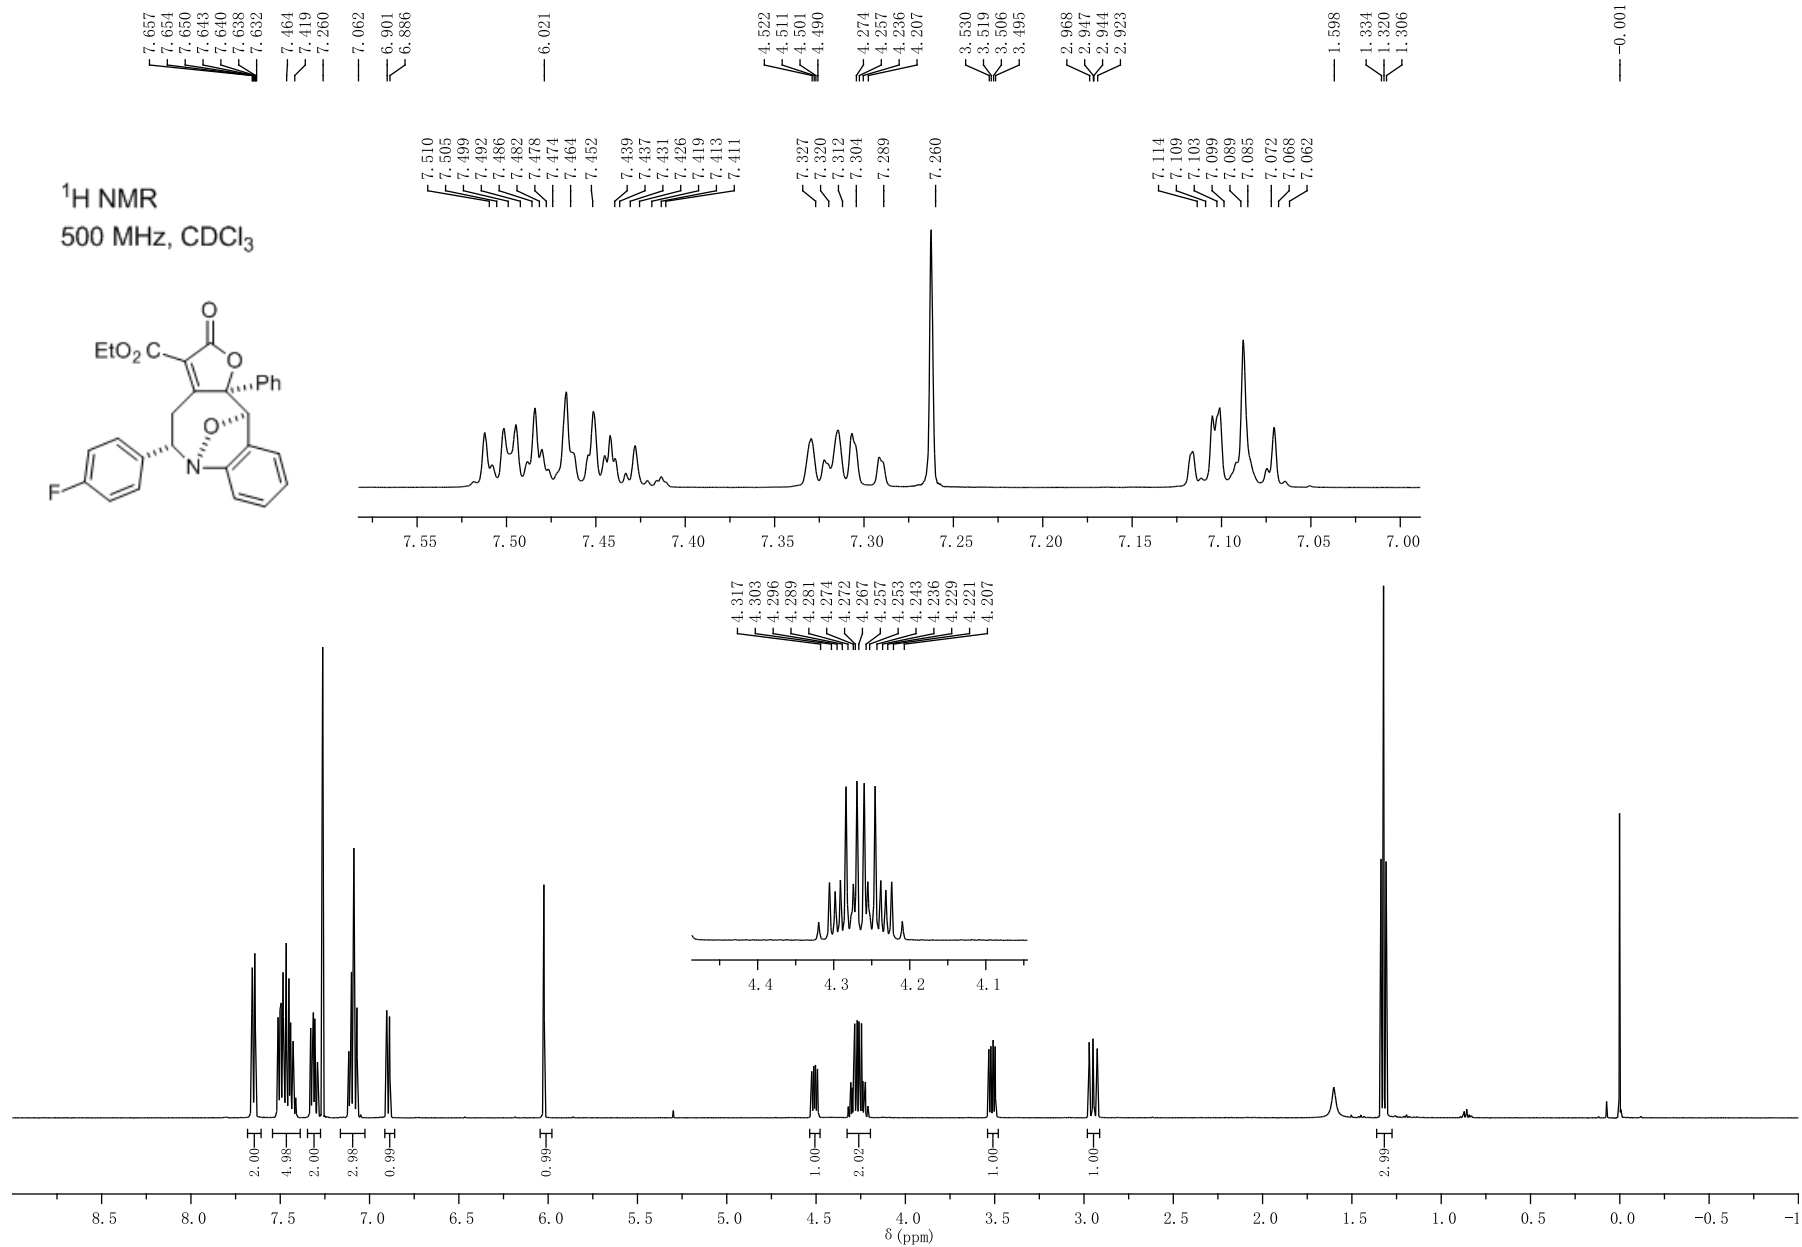

# Compound 3ma

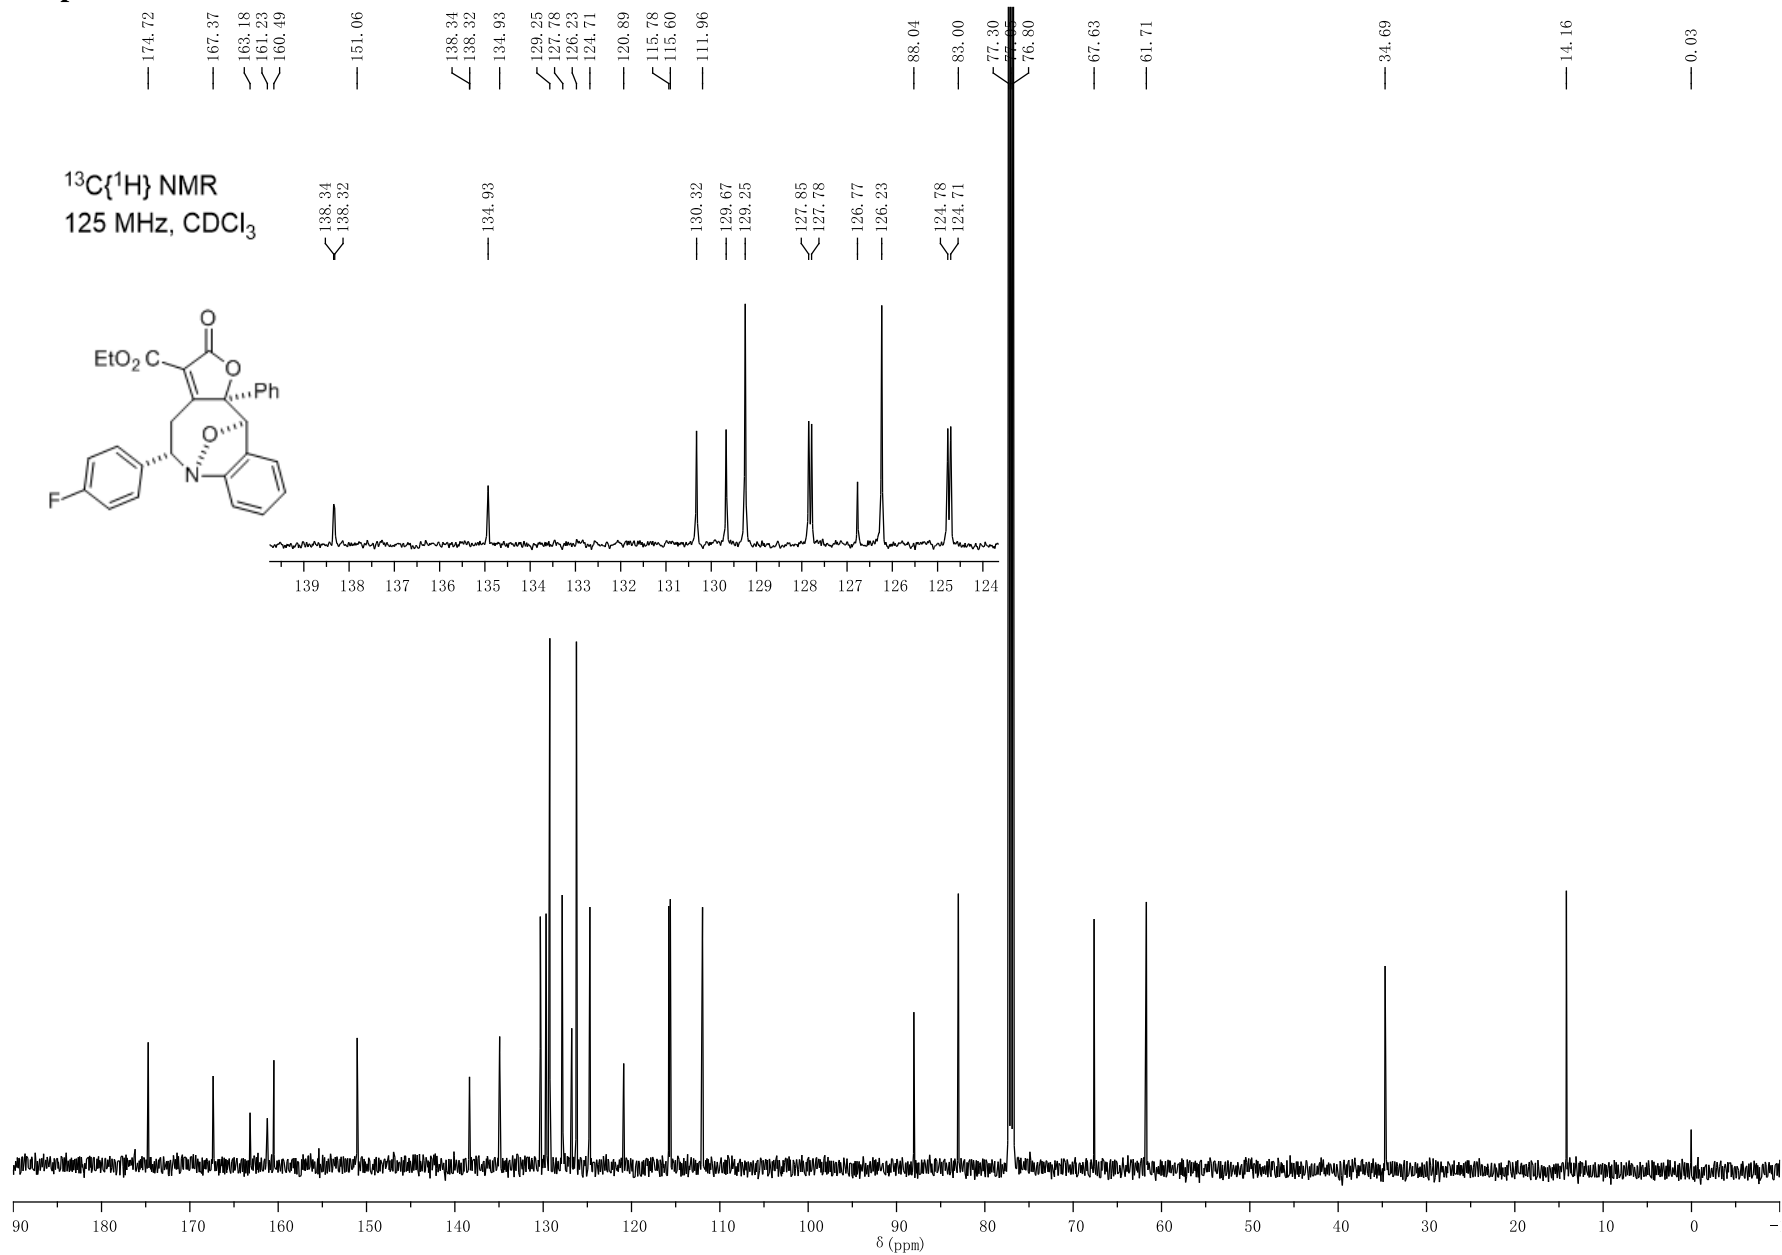

# Compound 3ma

$^{13}\text{C}$  NMR  
125 MHz,  $\text{CDCl}_3$



— -114.75

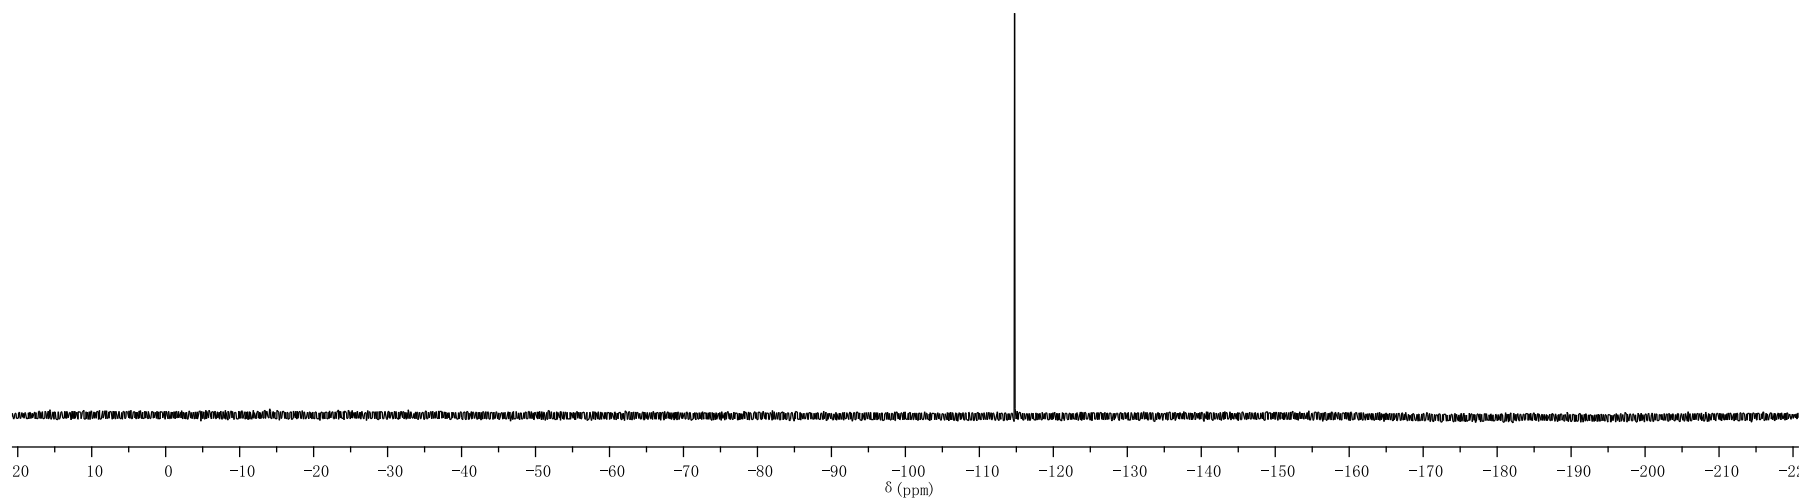

**Compound 3na**

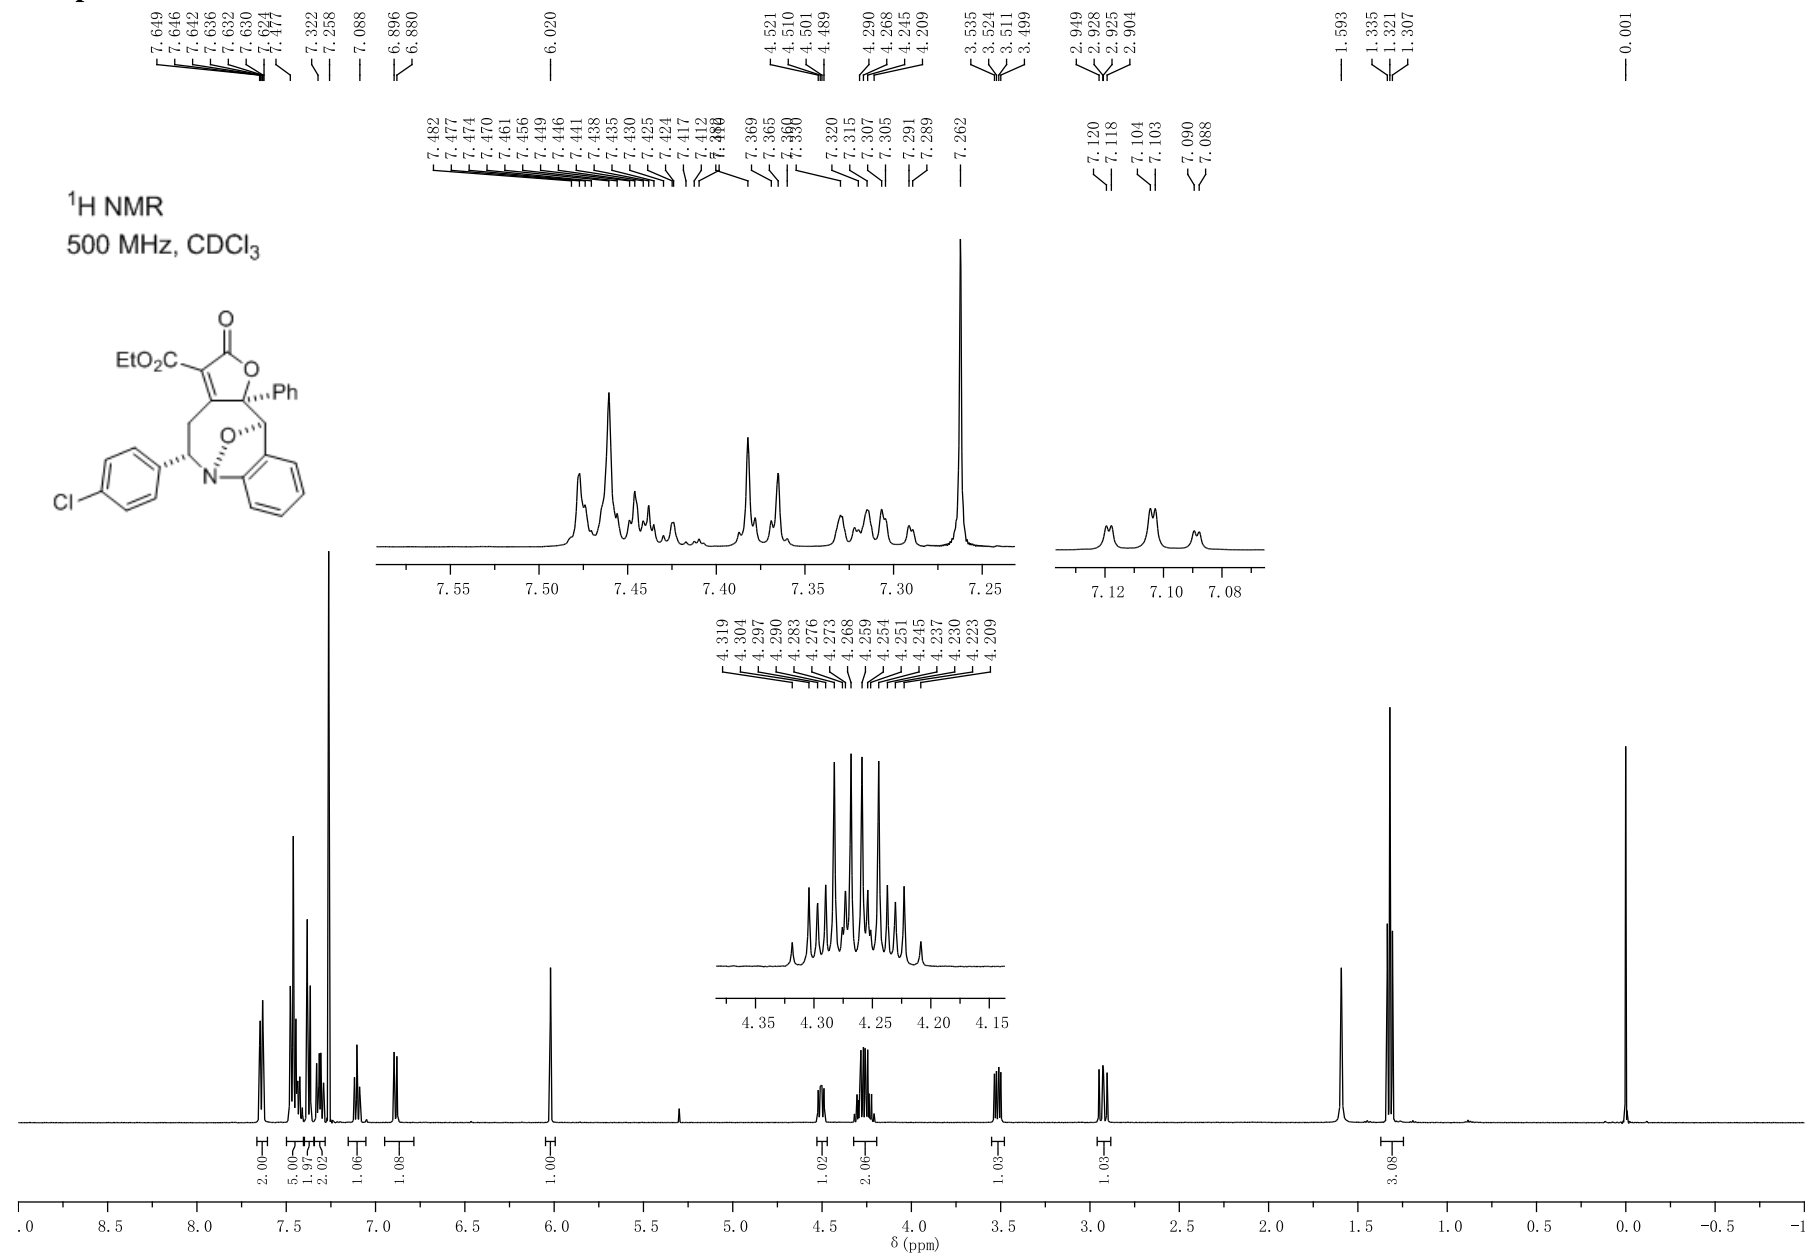



# Compound 3na

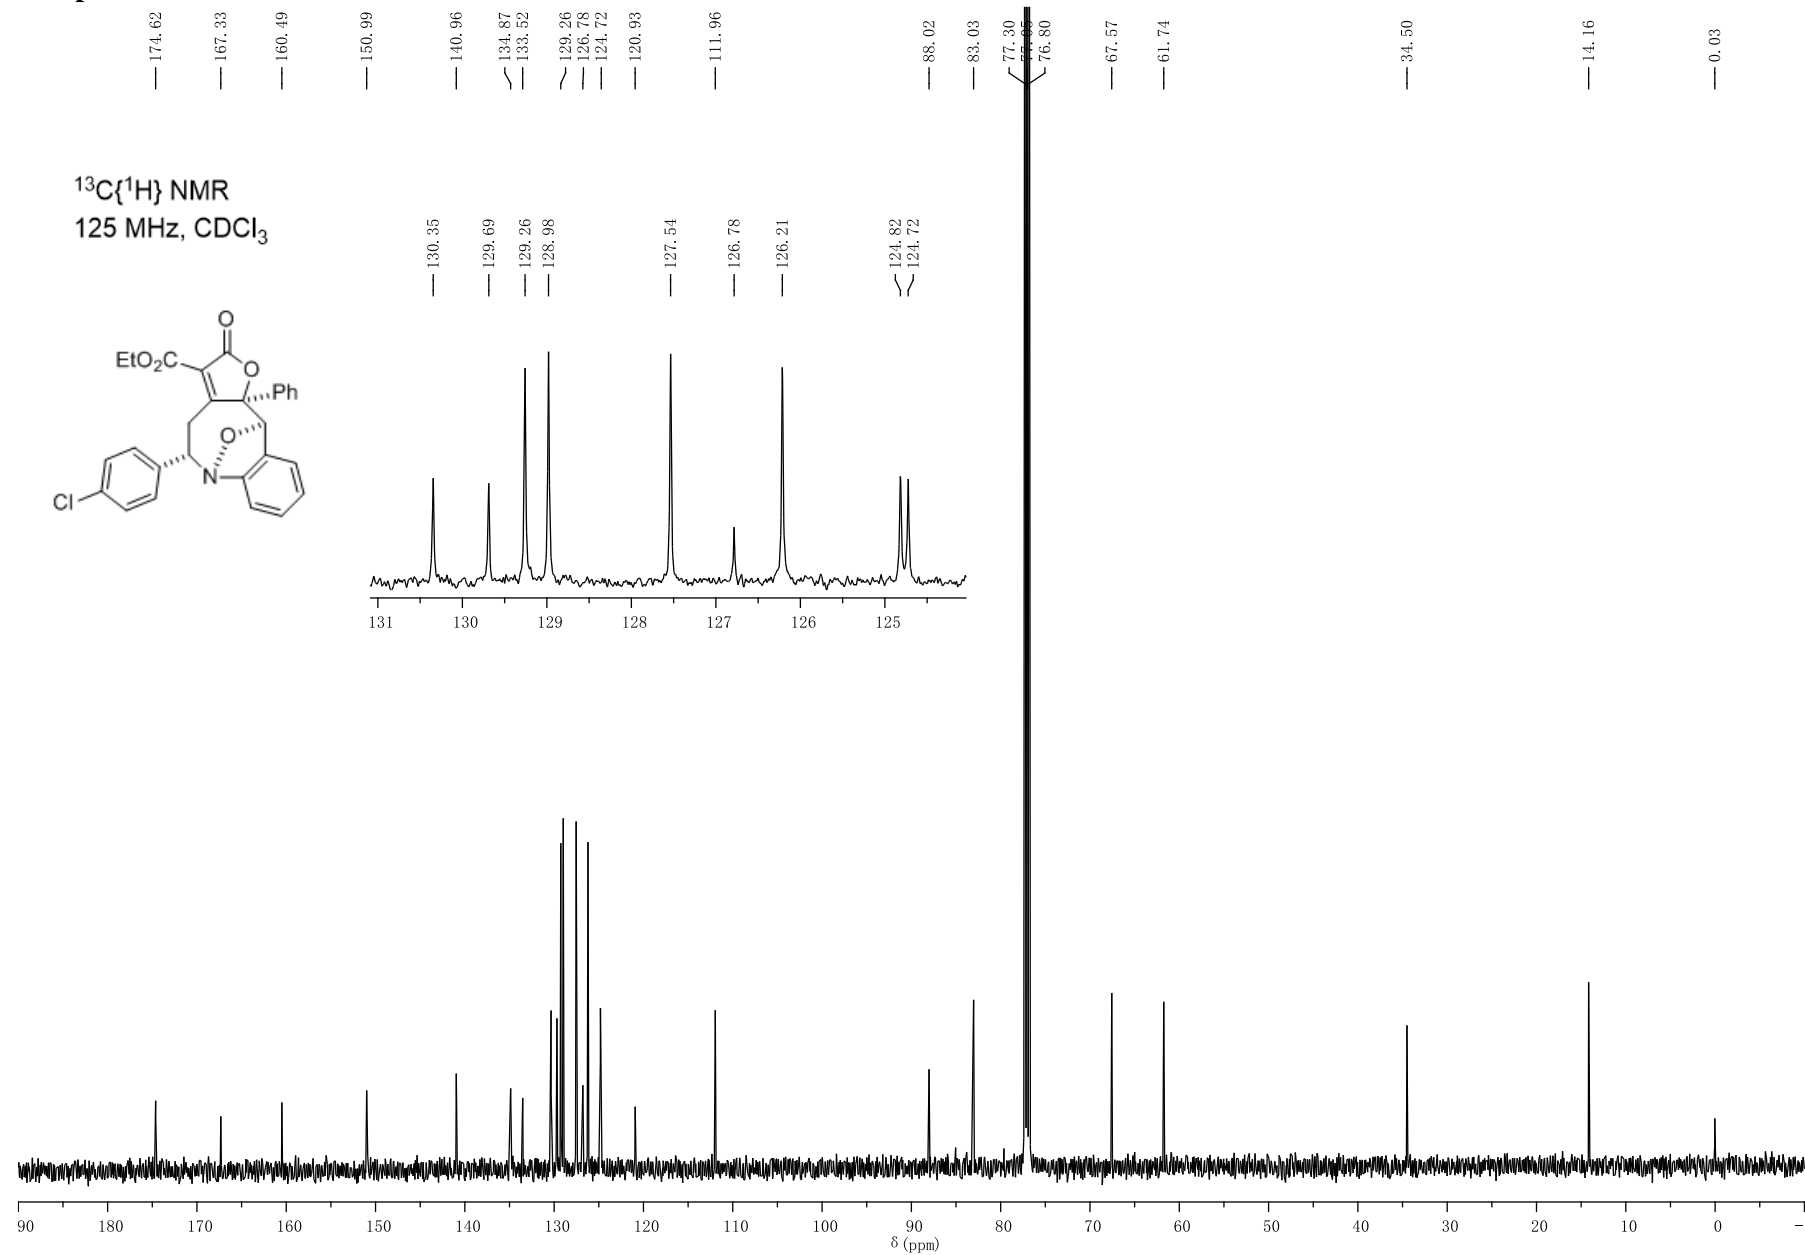

**Compound 30a**

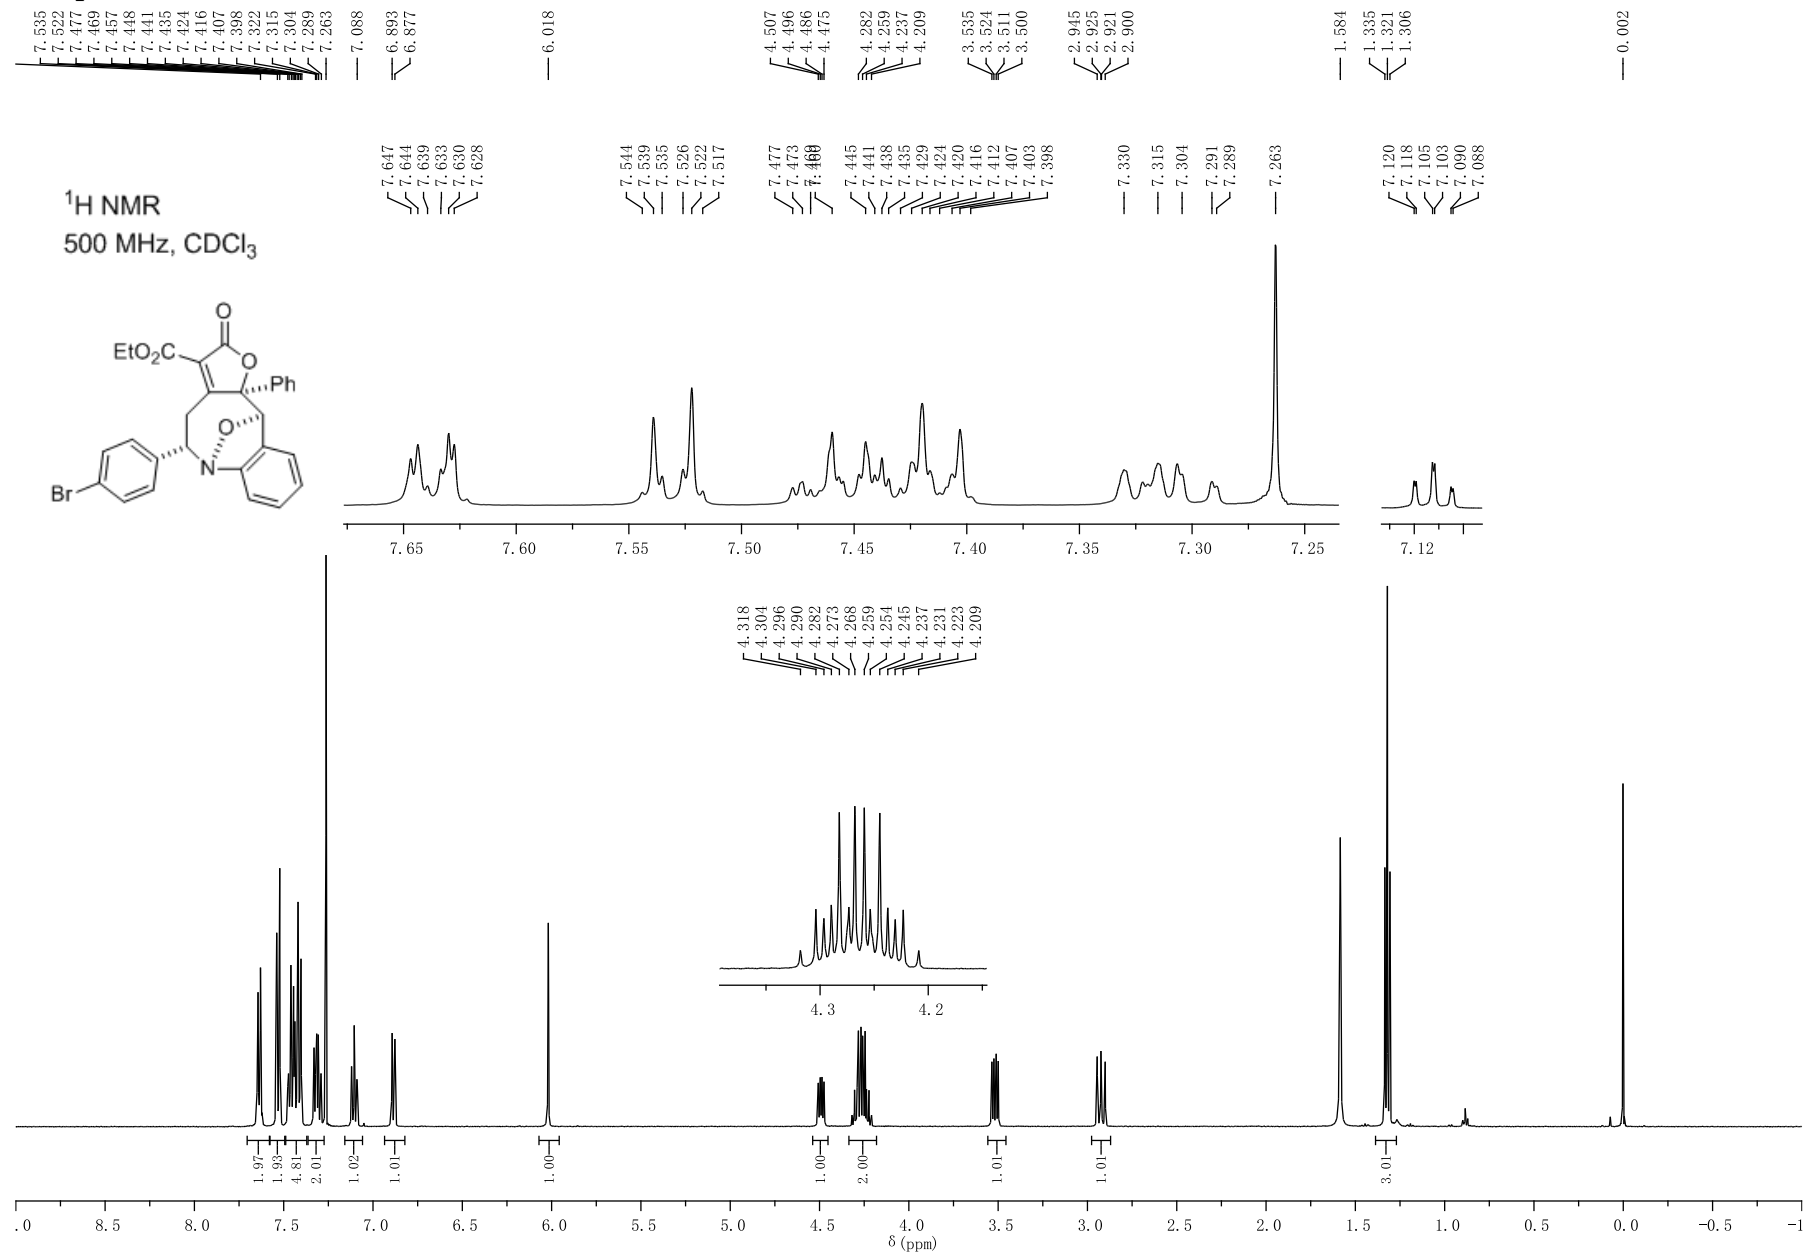

# Compound 30a

$^{13}\text{C}\{^1\text{H}\}$  NMR  
125 MHz,  $\text{CDCl}_3$

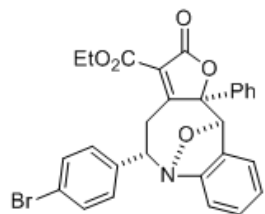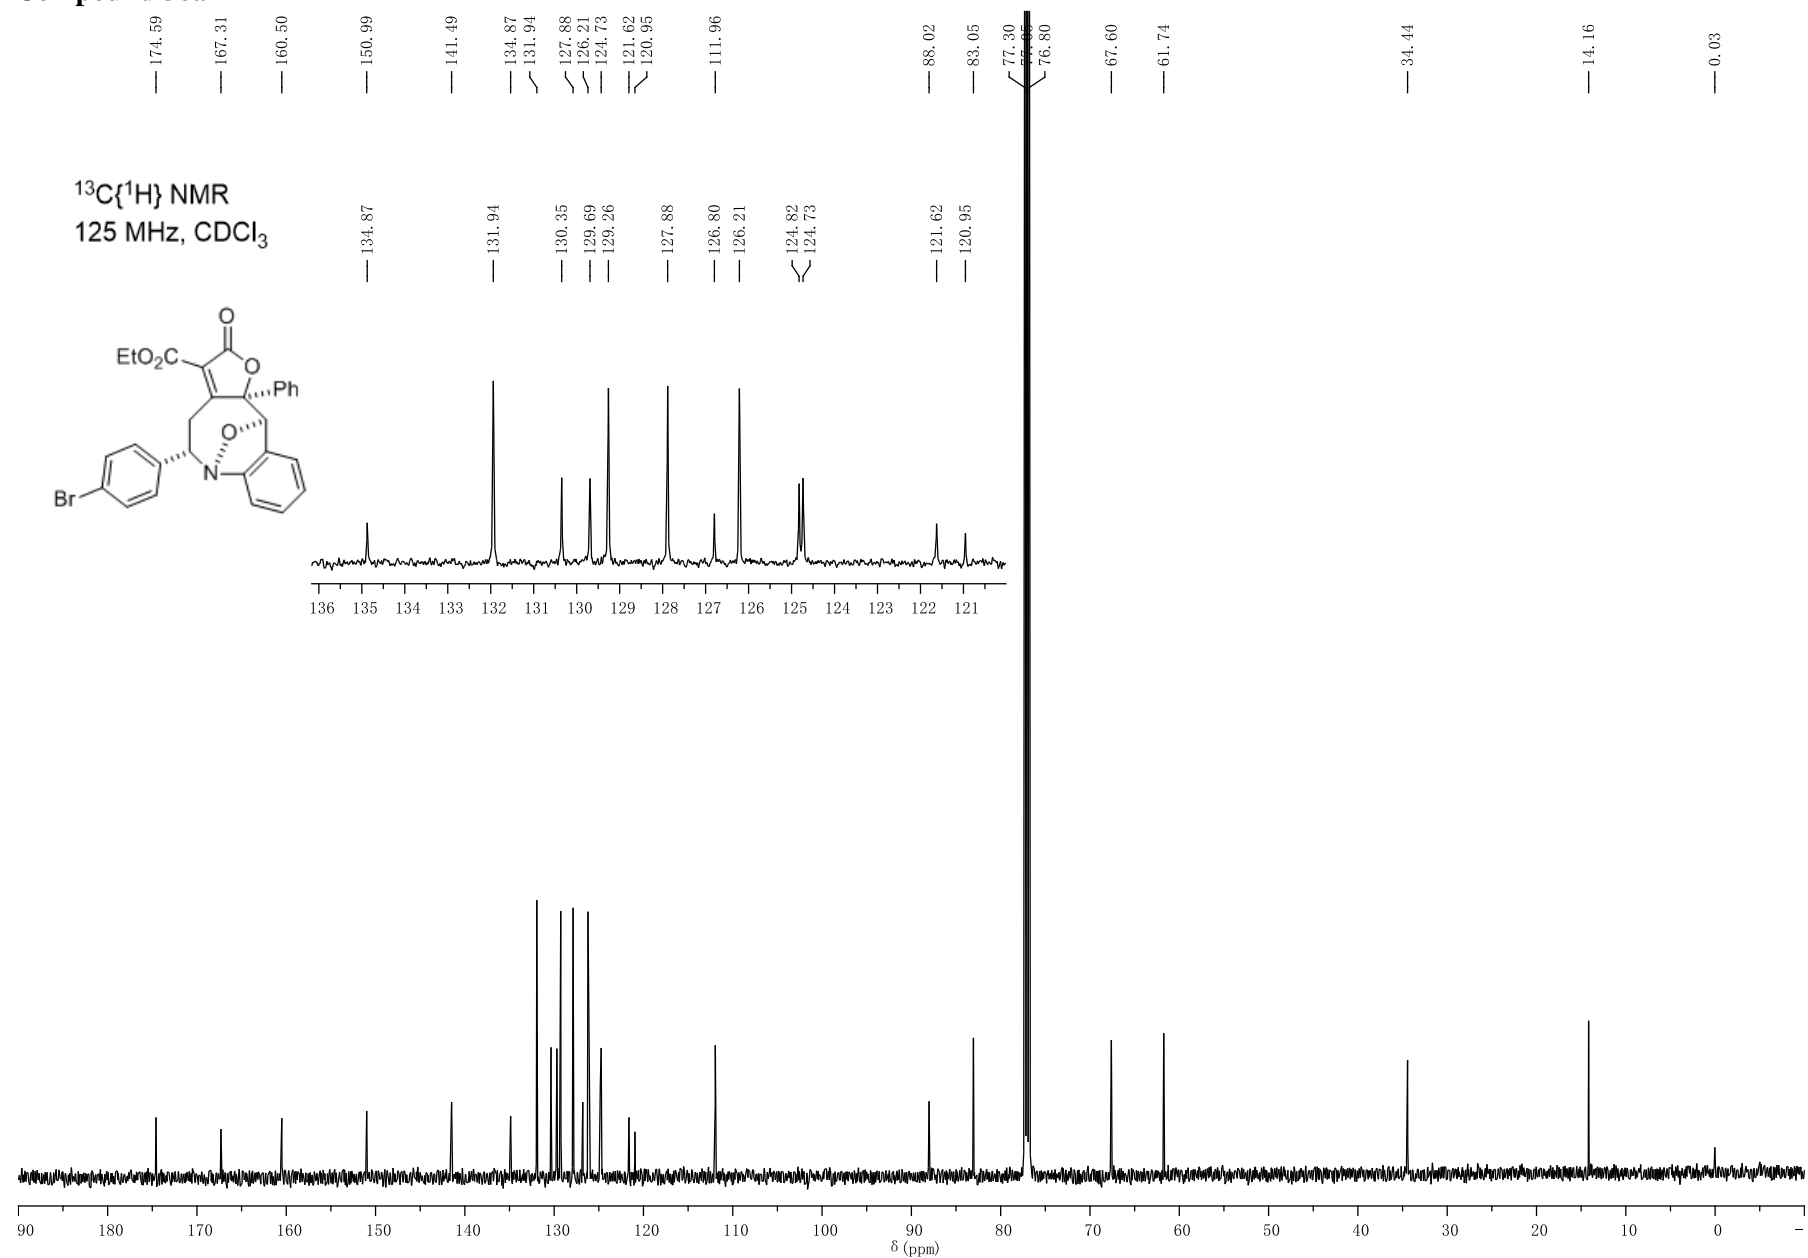

**Compound 3pa**

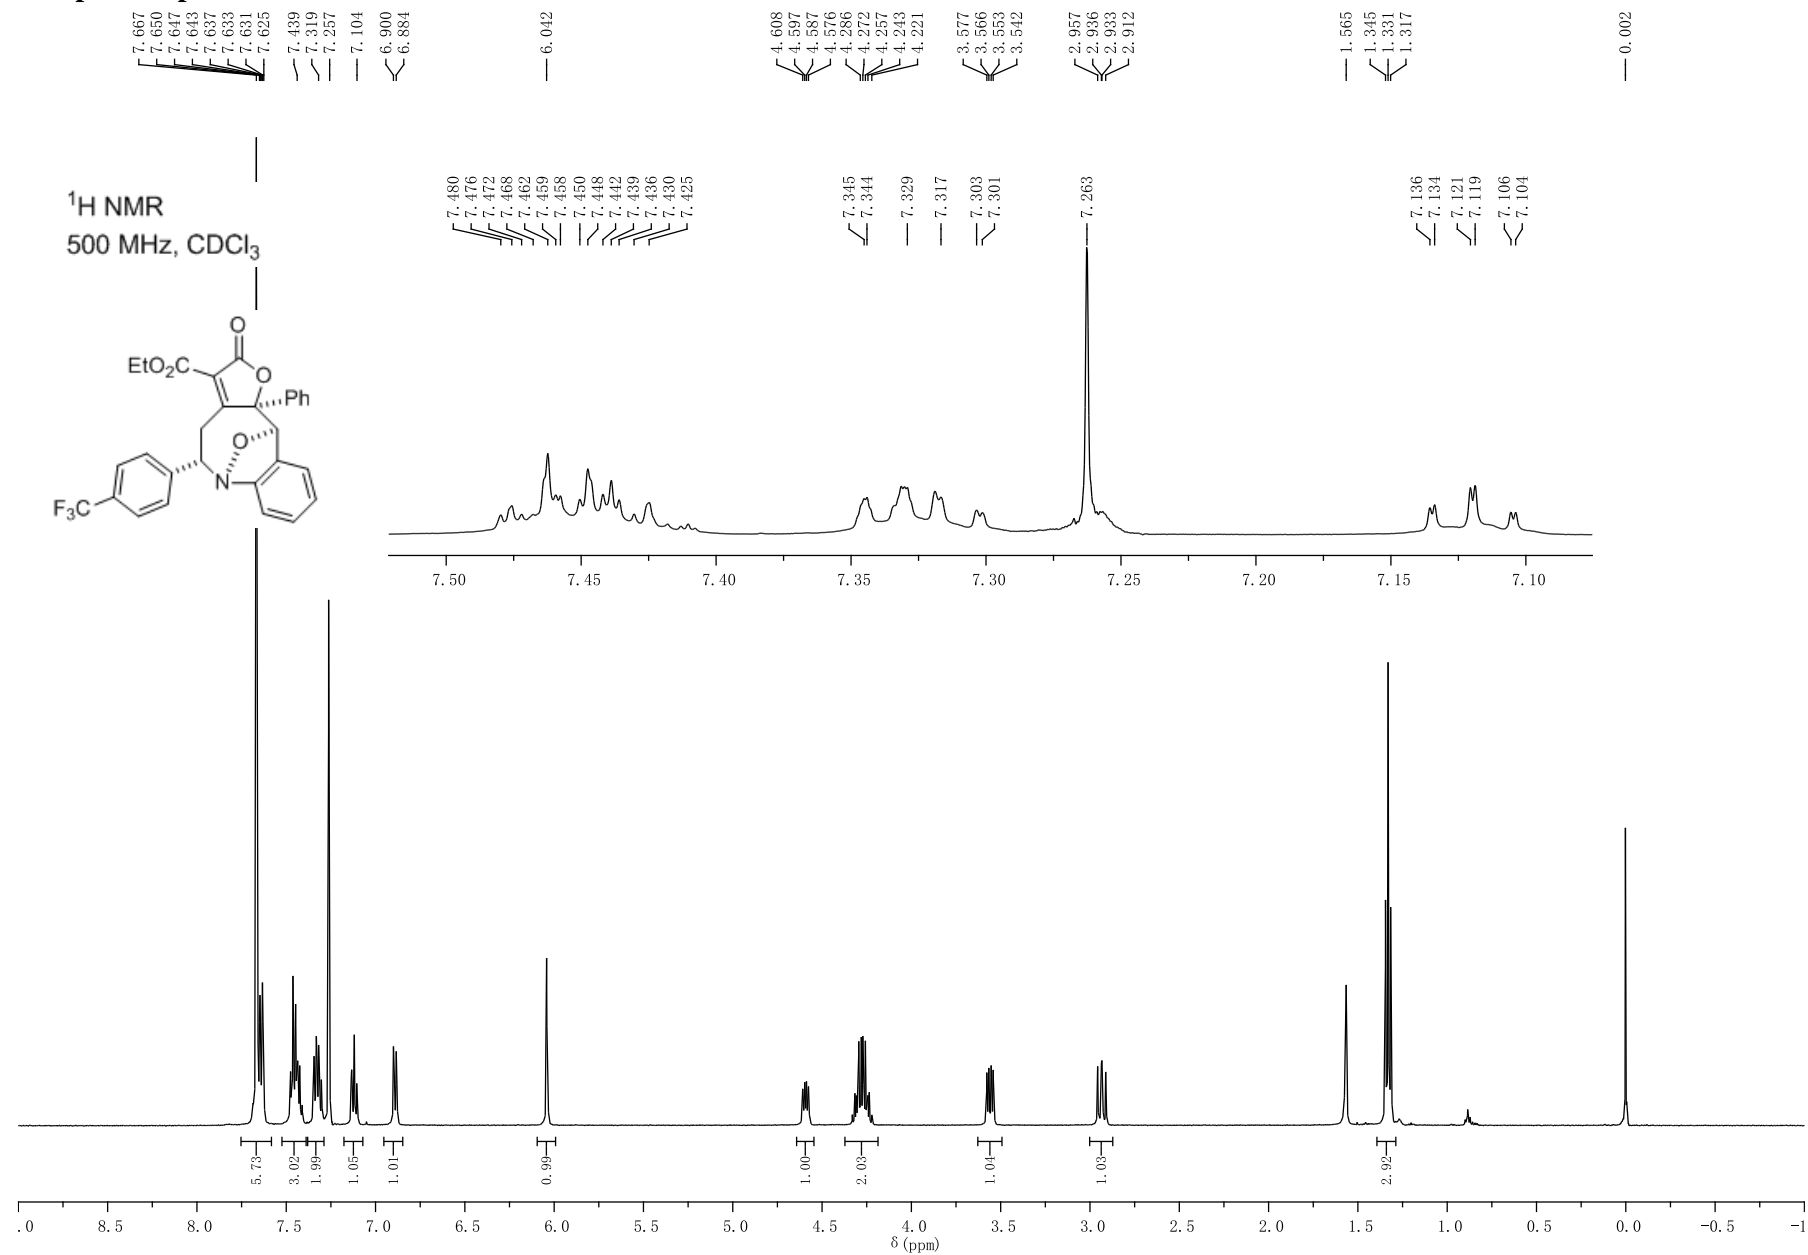

# Compound 3pa

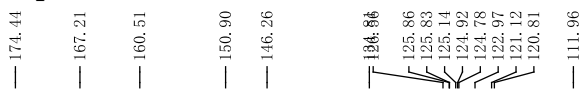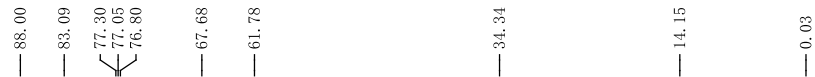

## <sup>13</sup>C{<sup>1</sup>H} NMR

125 MHz, CDCl<sub>3</sub>

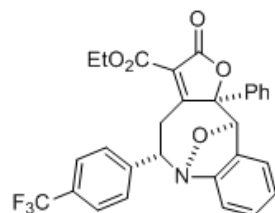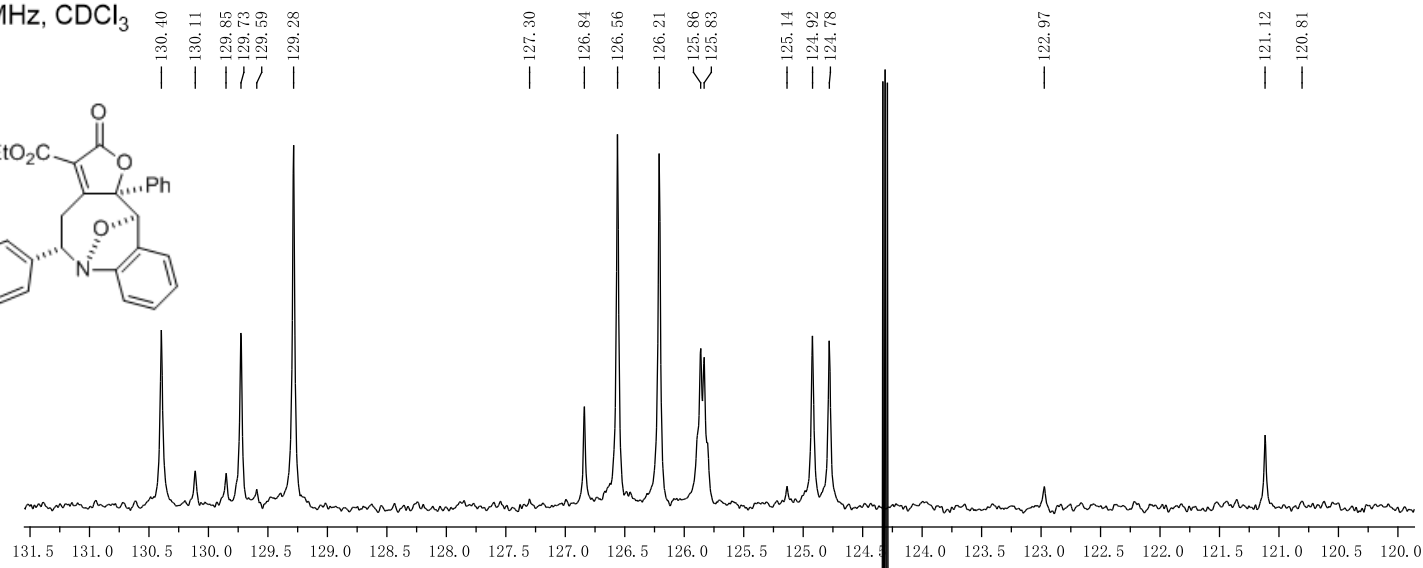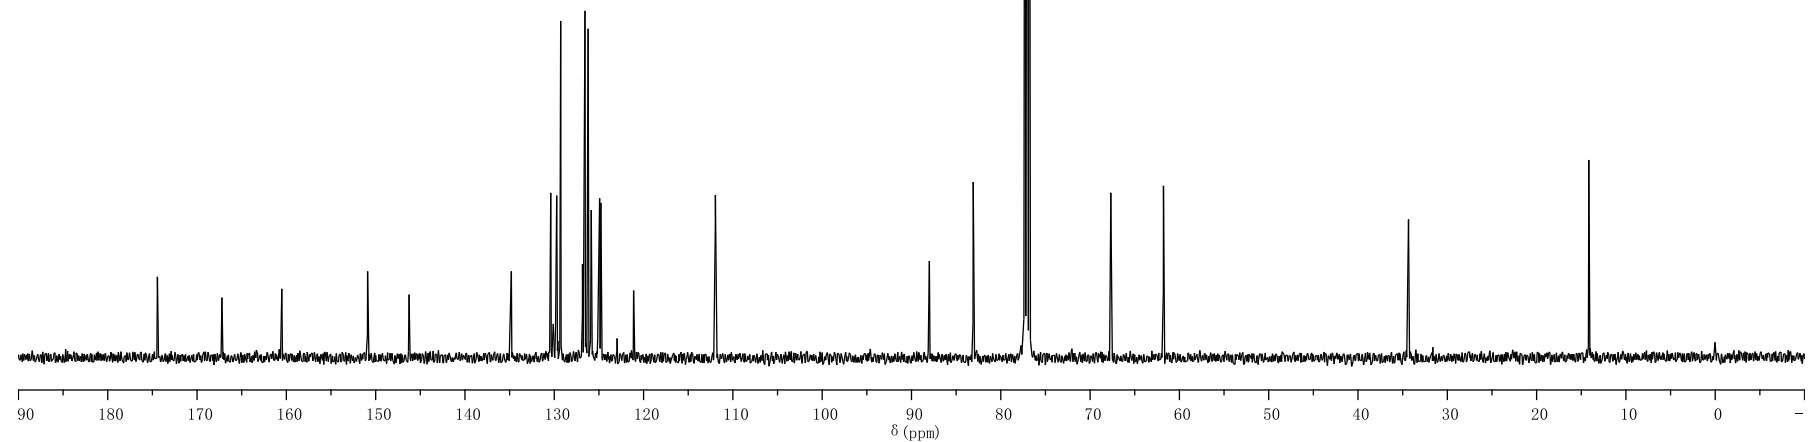

**Compound 3pa**

— -62.53

<sup>19</sup>F NMR  
470 MHz, CDCl<sub>3</sub>

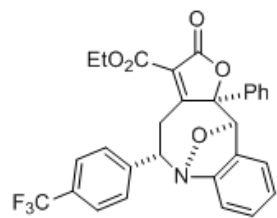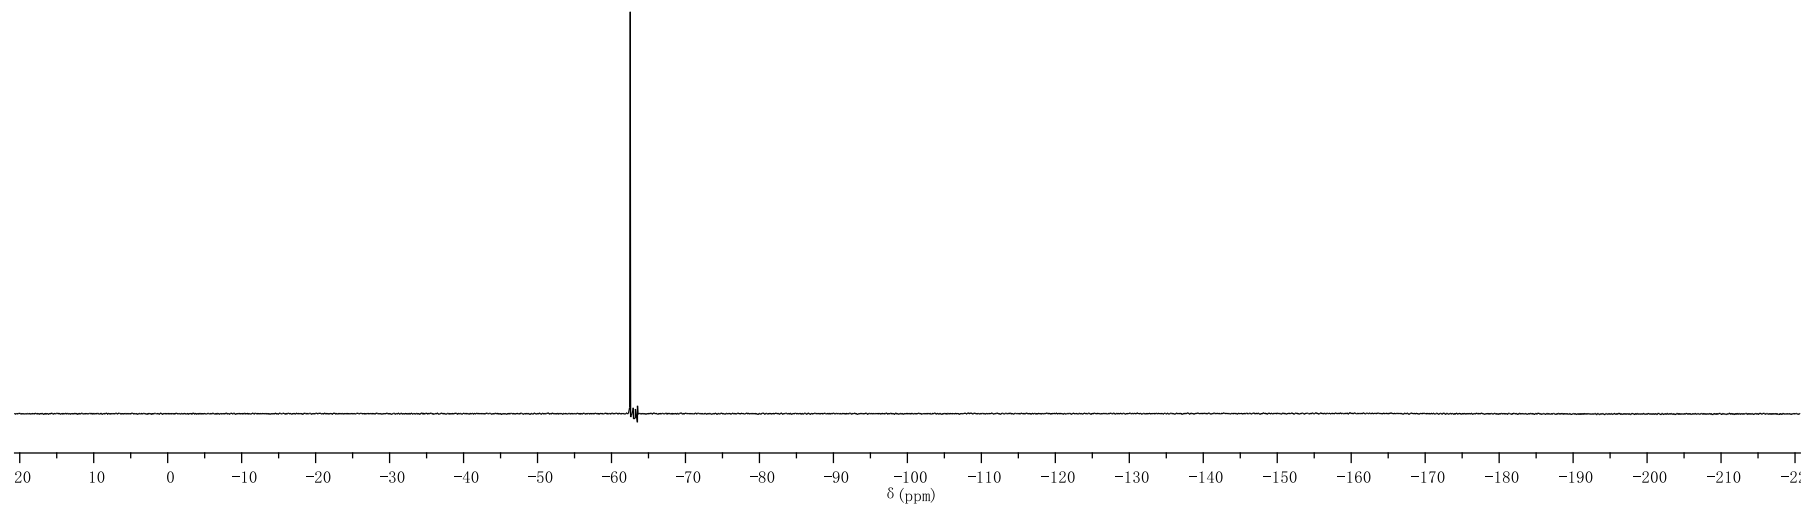

**Compound 3qa**

7.673  
7.670  
7.666  
7.656  
7.654  
7.648

7.431  
7.312  
7.214  
7.075

6.902  
6.887

6.017

4.513  
4.502  
4.493  
4.481

4.288  
4.266  
4.245  
4.216

3.537  
3.526  
3.513  
3.502

3.012  
2.991  
2.988  
2.967

2.365

1.620

1.343  
1.329  
1.314

0.008

7.473  
7.470  
7.466  
7.456  
7.441  
7.431  
7.416  
7.404  
7.402

7.326  
7.312  
7.299  
7.283  
7.264

7.230  
7.214

7.106  
7.105  
7.091  
7.090  
7.076  
7.075

<sup>1</sup>H NMR  
500 MHz, CDCl<sub>3</sub>

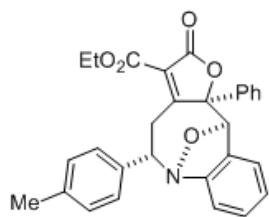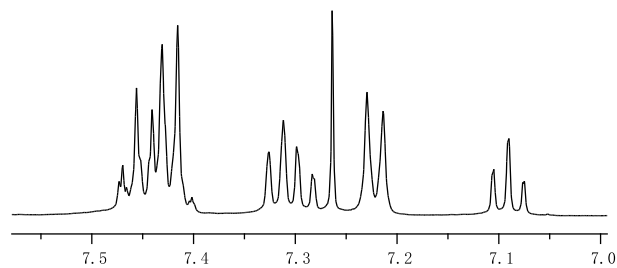

4.324  
4.310  
4.303  
4.296  
4.288  
4.281  
4.274  
4.266  
4.260  
4.252  
4.248  
4.238  
4.231  
4.216

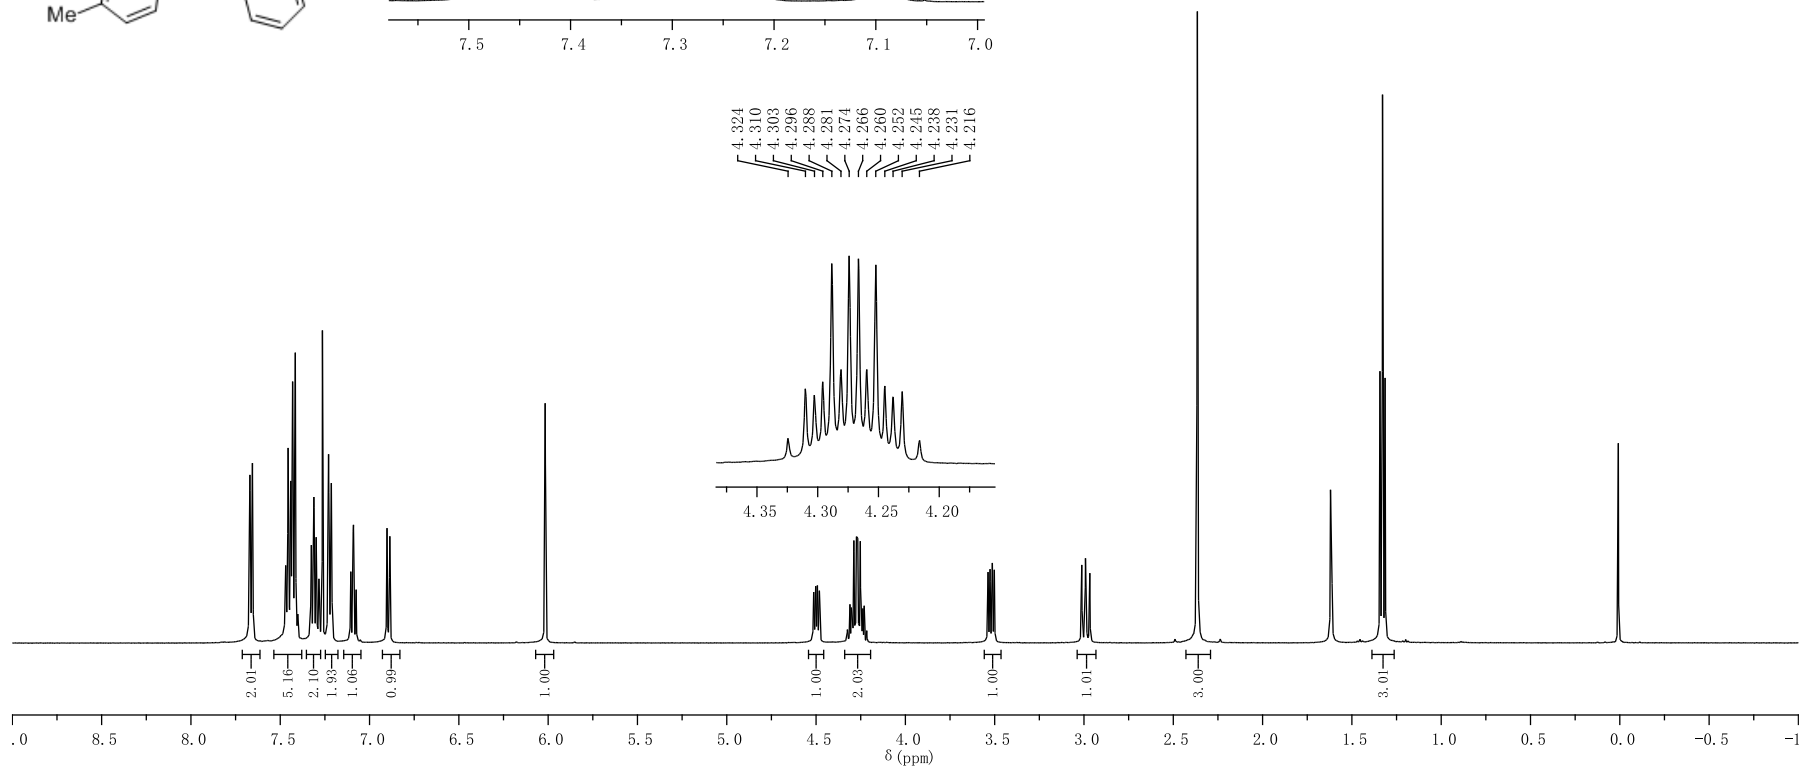

# Compound 3qa

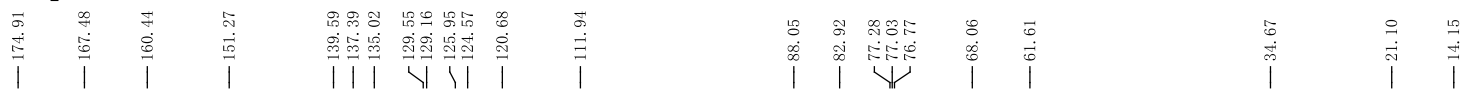

$^{13}\text{C}\{^1\text{H}\}$  NMR  
125 MHz,  $\text{CDCl}_3$

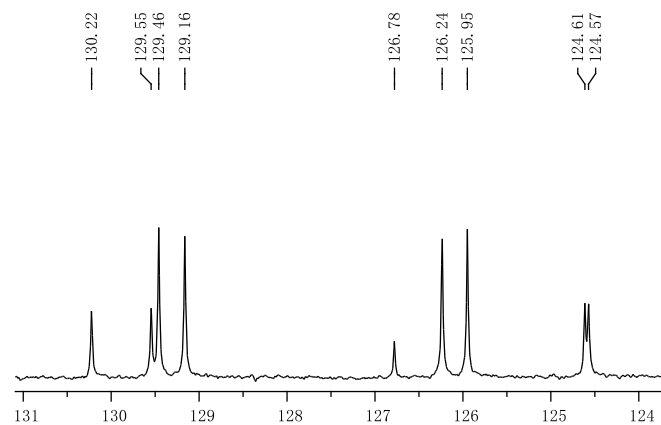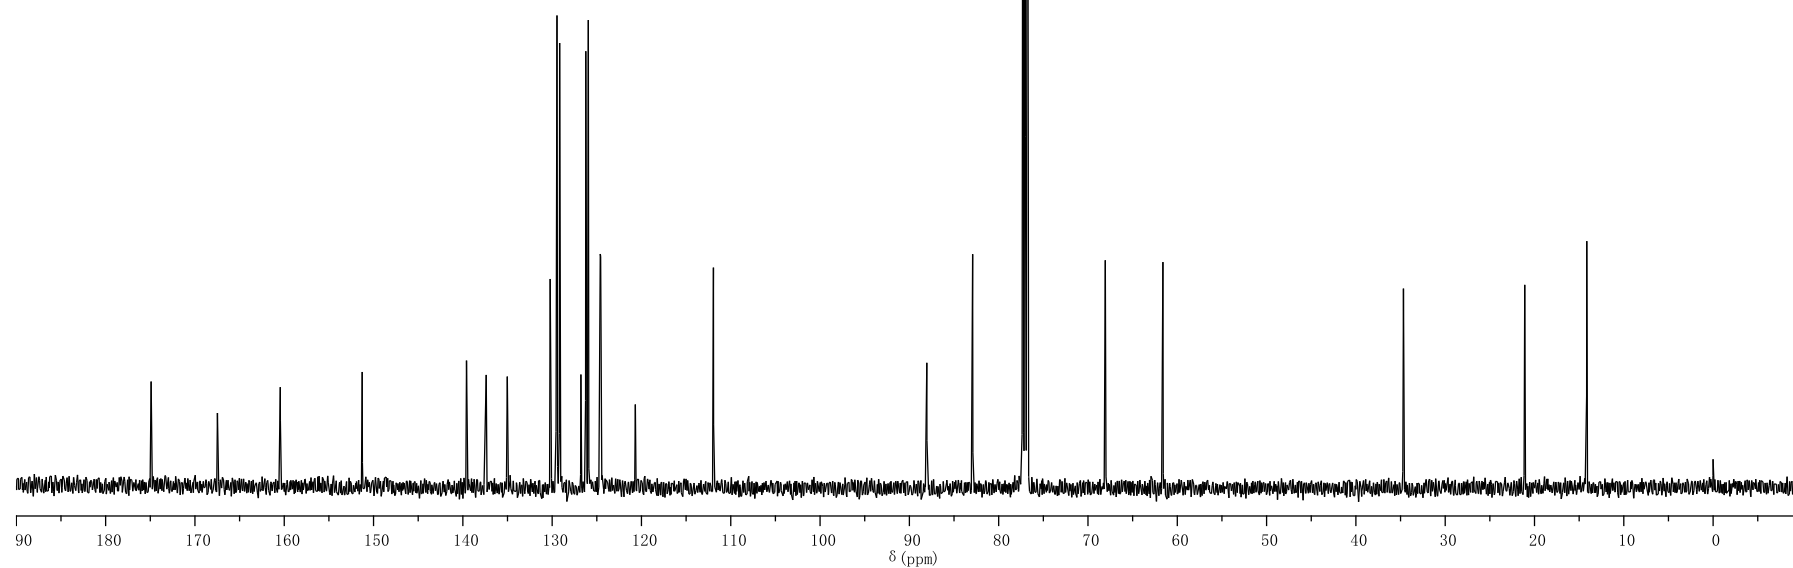



# Compound 3ra

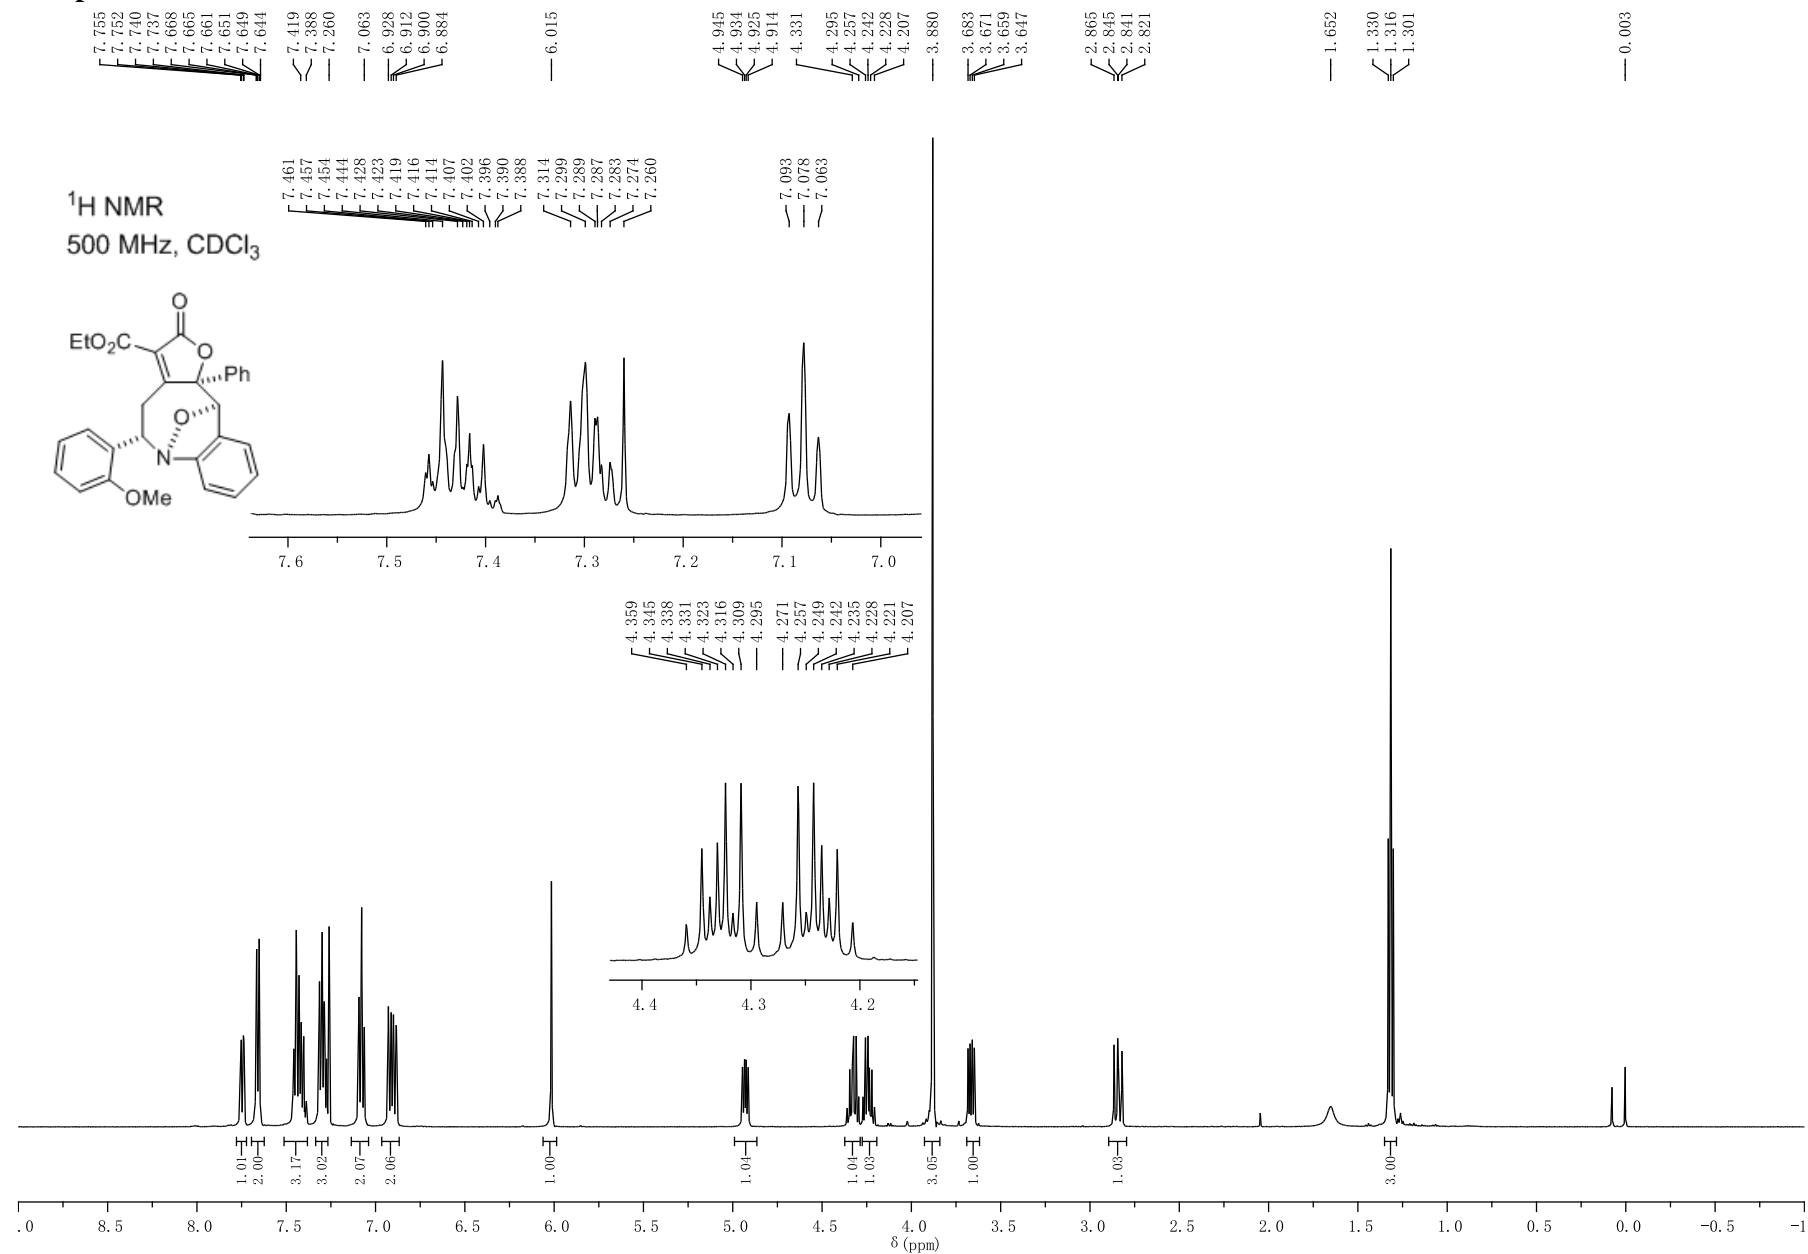

# Compound 3ra

— 174.17  
— 167.77  
— 160.27  
— 155.50  
— 151.24

— 135.20  
— 130.14  
— 129.12  
— 127.54  
— 126.31  
— 124.49  
— 121.29  
— 121.03

— 112.16  
— 110.29

— 88.24  
— 82.78  
— 77.28  
— 77.03  
— 76.78

— 62.57  
— 61.39  
— 55.40

— 32.24

— 14.10

$^{13}\text{C}\{^1\text{H}\}$  NMR  
125 MHz,  $\text{CDCl}_3$

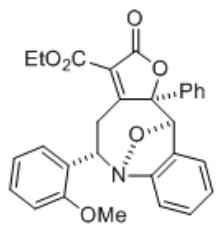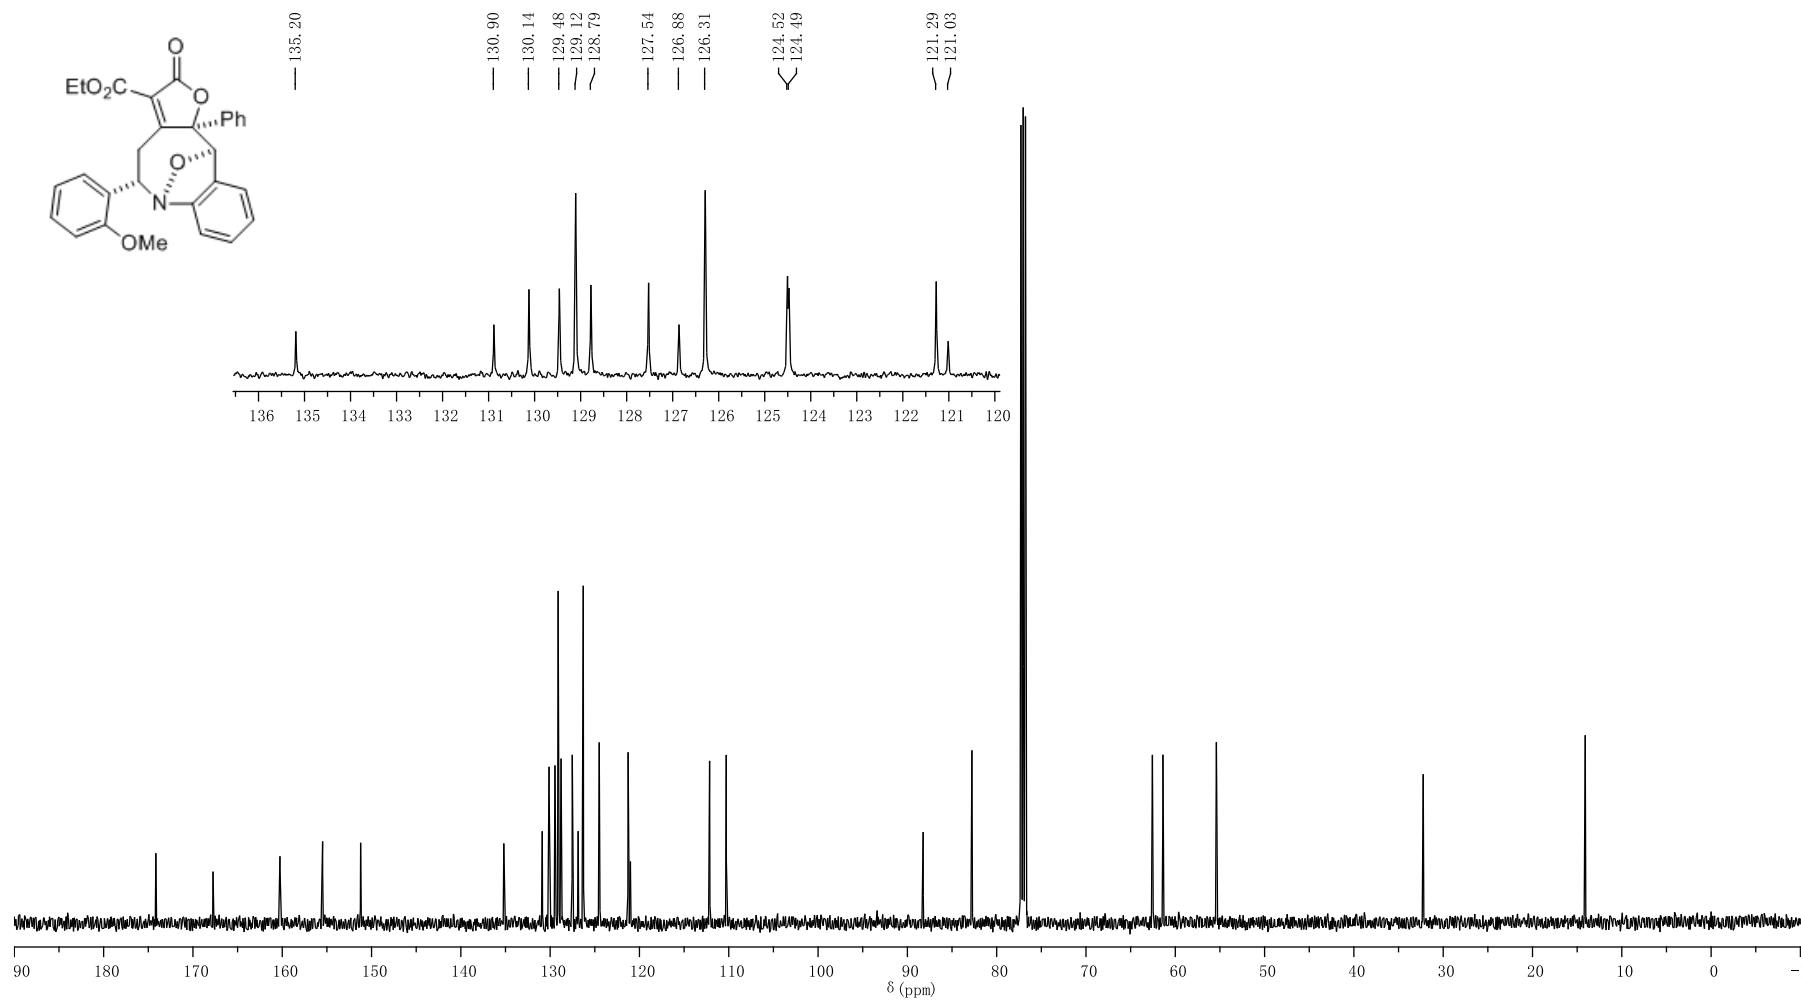

**Compound 3sa**

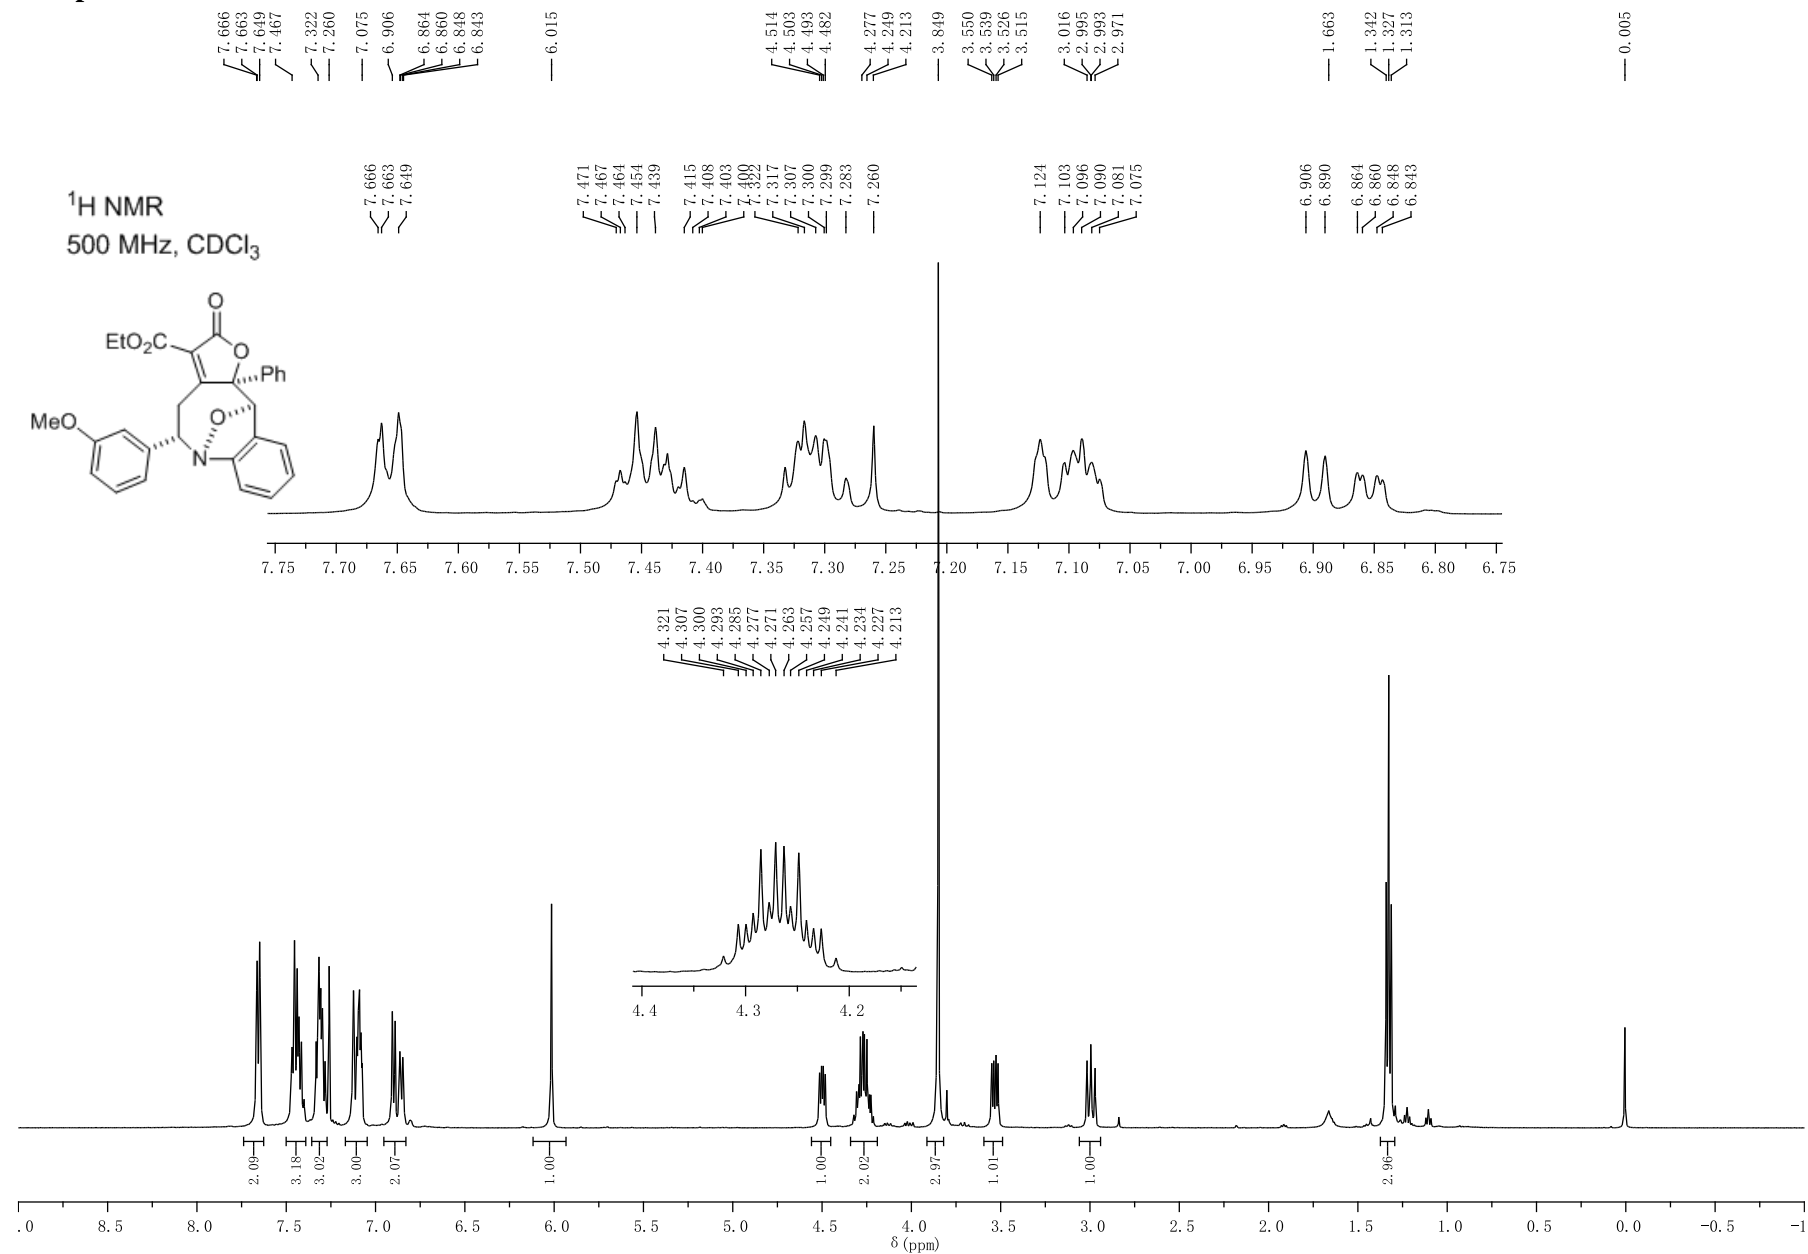

# Compound 3sa

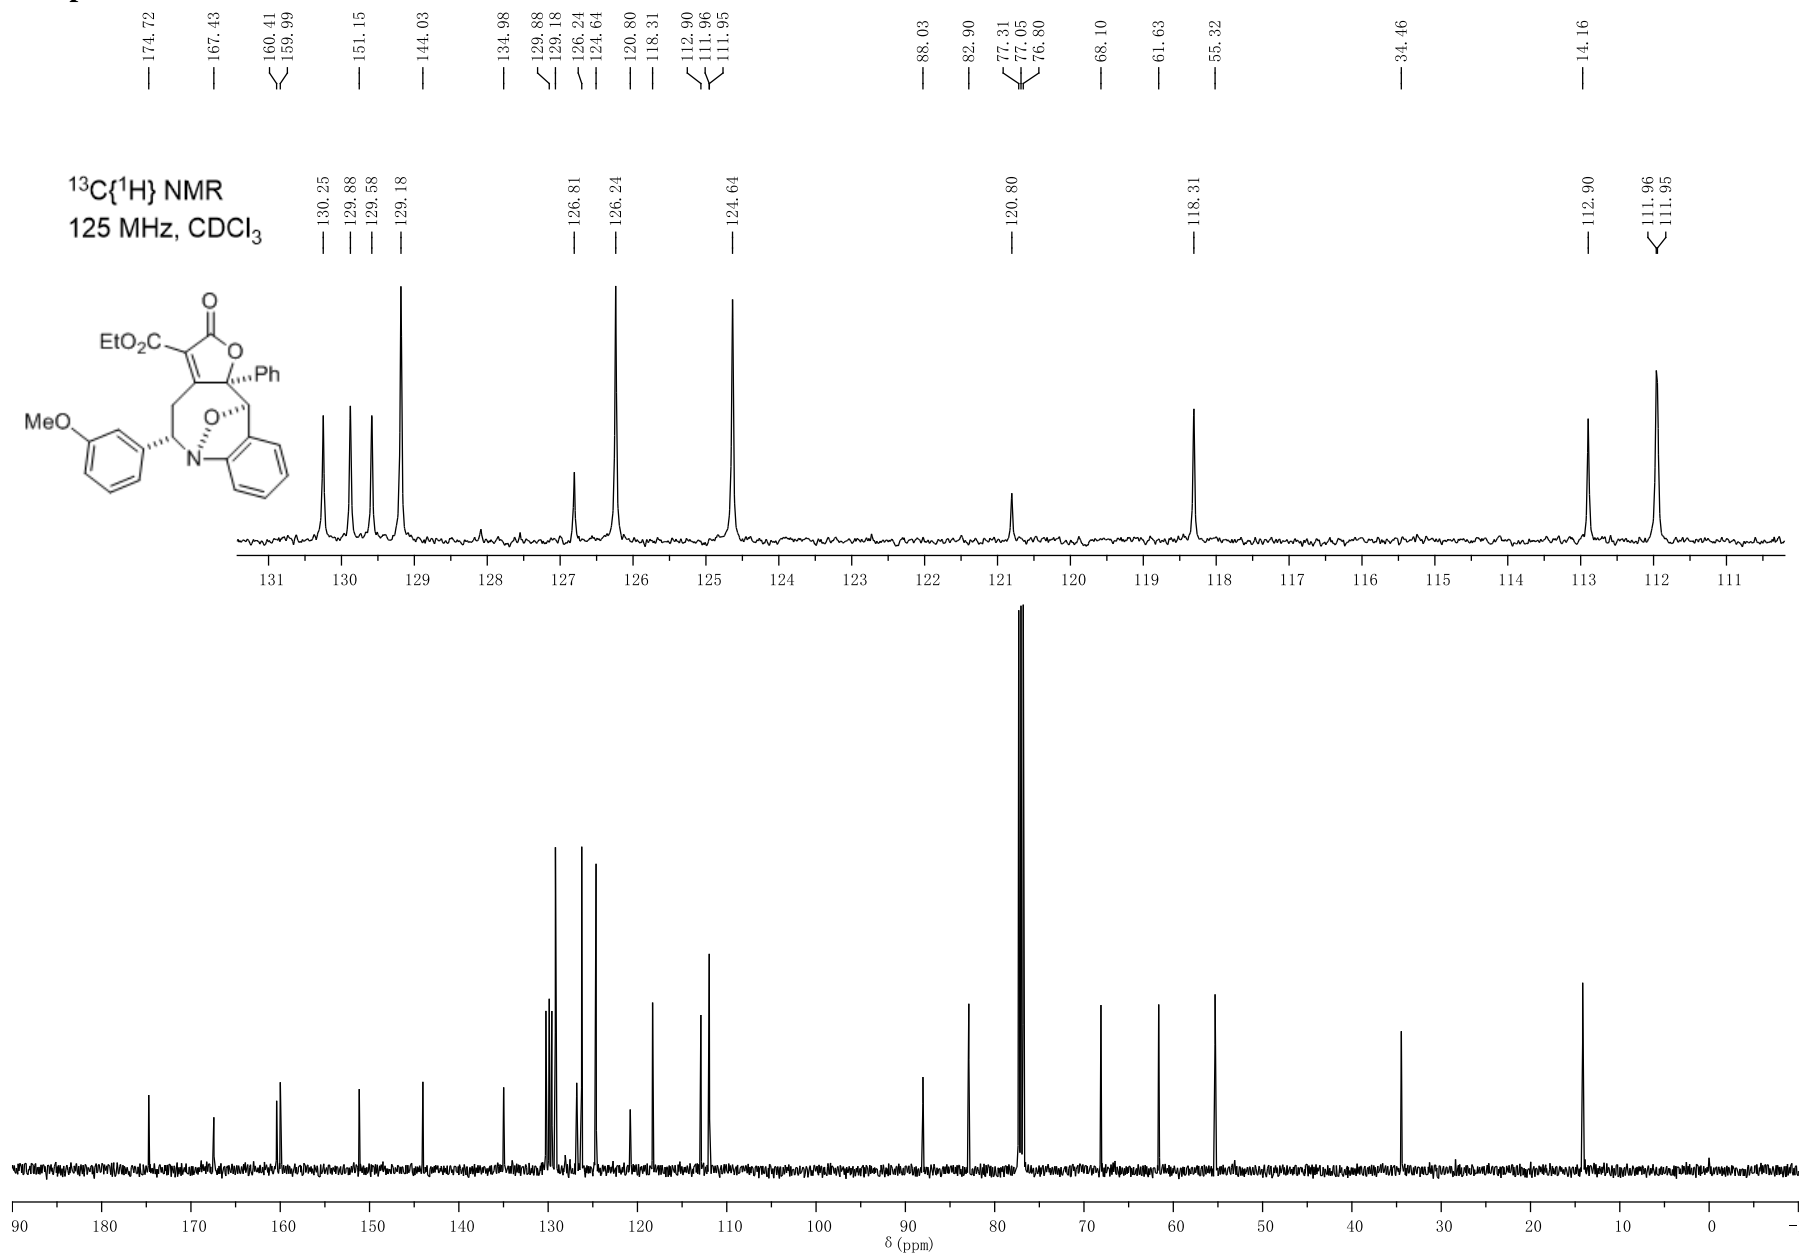

**Compound 3ua**

<sup>1</sup>H NMR  
500 MHz, CDCl<sub>3</sub>

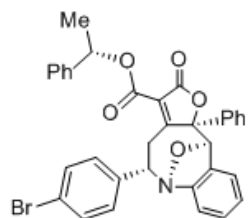

7.656  
7.653  
7.639  
7.635  
7.407  
7.375  
7.326  
7.203  
7.120  
6.809  
6.794

6.032  
6.014  
6.001  
5.988

4.337  
4.325  
4.316  
4.304

3.491  
3.480  
3.467  
3.456

2.913  
2.892  
2.889  
2.868

1.629  
1.616

1.285

0.029

7.656  
7.653  
7.639  
7.637

7.505  
7.488

7.473

7.453

7.439

7.419

7.385

7.375

7.371

7.362

7.354

7.339

7.326

7.310

7.295

7.284

7.219

7.203

7.150

7.149

7.134

7.120

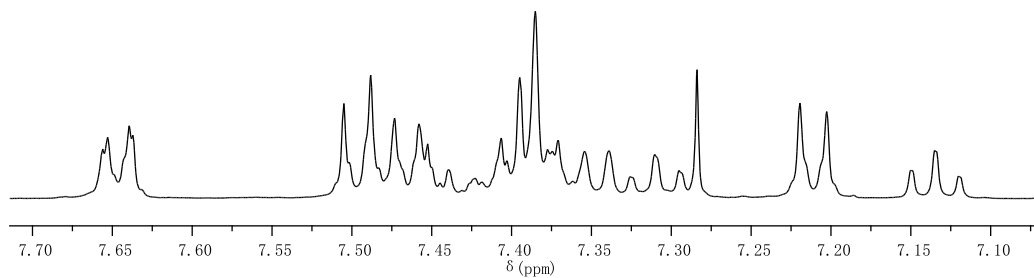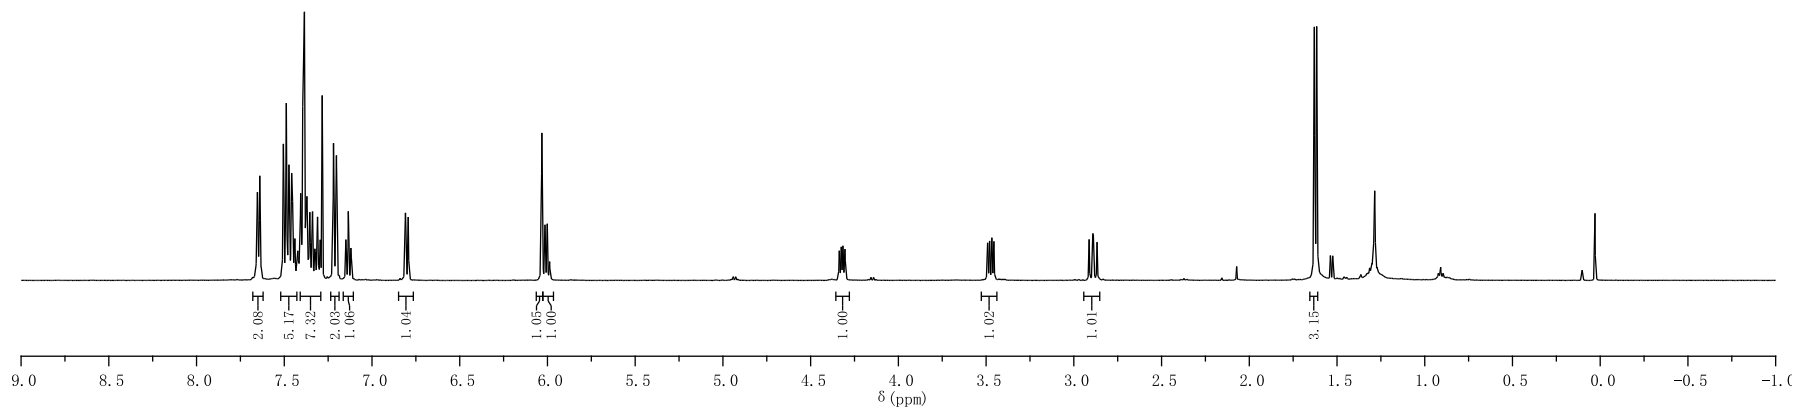

# Compound 3ua

$^{13}\text{C}\{^1\text{H}\}$  NMR  
125 MHz,  $\text{CDCl}_3$

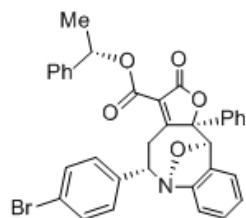

— 173.68  
— 167.15  
— 159.42  
— 150.87  
— 141.29  
— 140.32  
— 134.80  
— 129.65  
— 128.43  
— 126.37  
— 124.77  
— 121.55  
— 120.76  
— 111.81

— 87.90  
— 82.99  
— 77.03  
— 76.78  
— 73.83  
— 67.37

— 34.29  
— 21.62

— 134.80  
— 131.83  
— 130.20  
— 129.65  
— 129.22  
— 128.72  
— 128.43  
— 127.79  
— 126.84  
— 126.37  
— 126.24  
— 124.81  
— 124.77

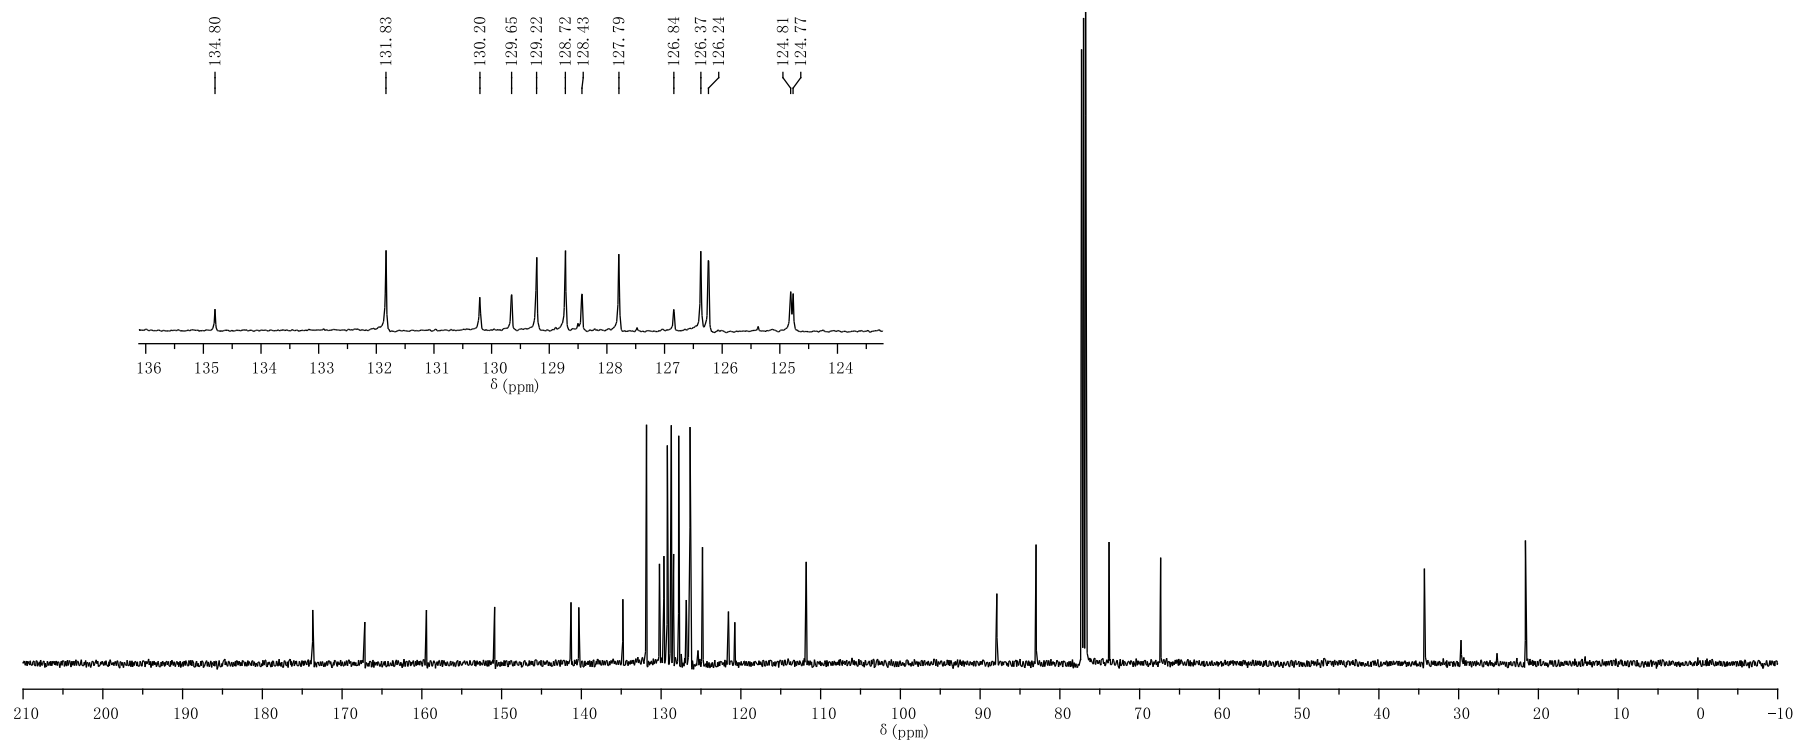

# Compound 3ua'

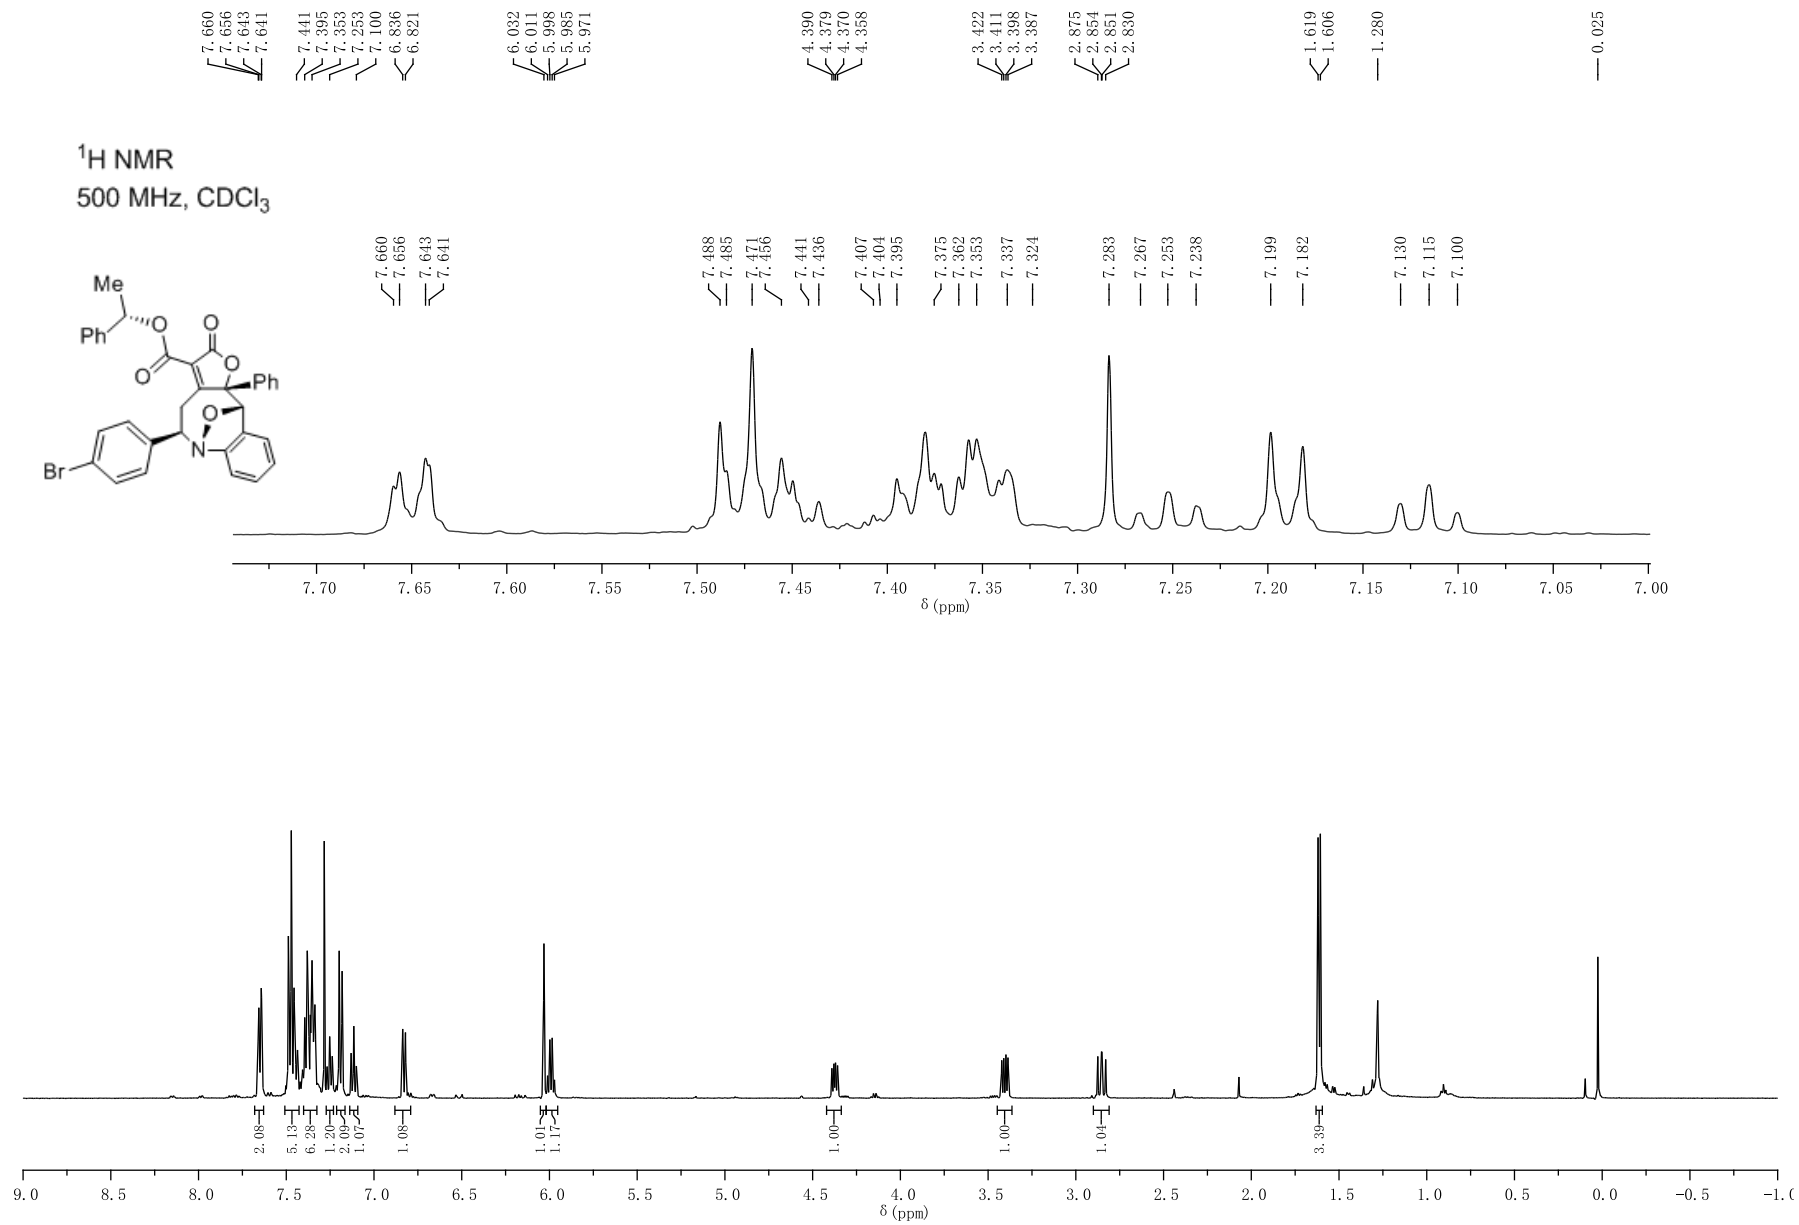

# Compound 3ua'

$^{13}\text{C}\{^1\text{H}\}$  NMR  
125 MHz,  $\text{CDCl}_3$

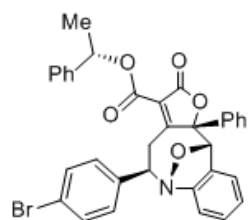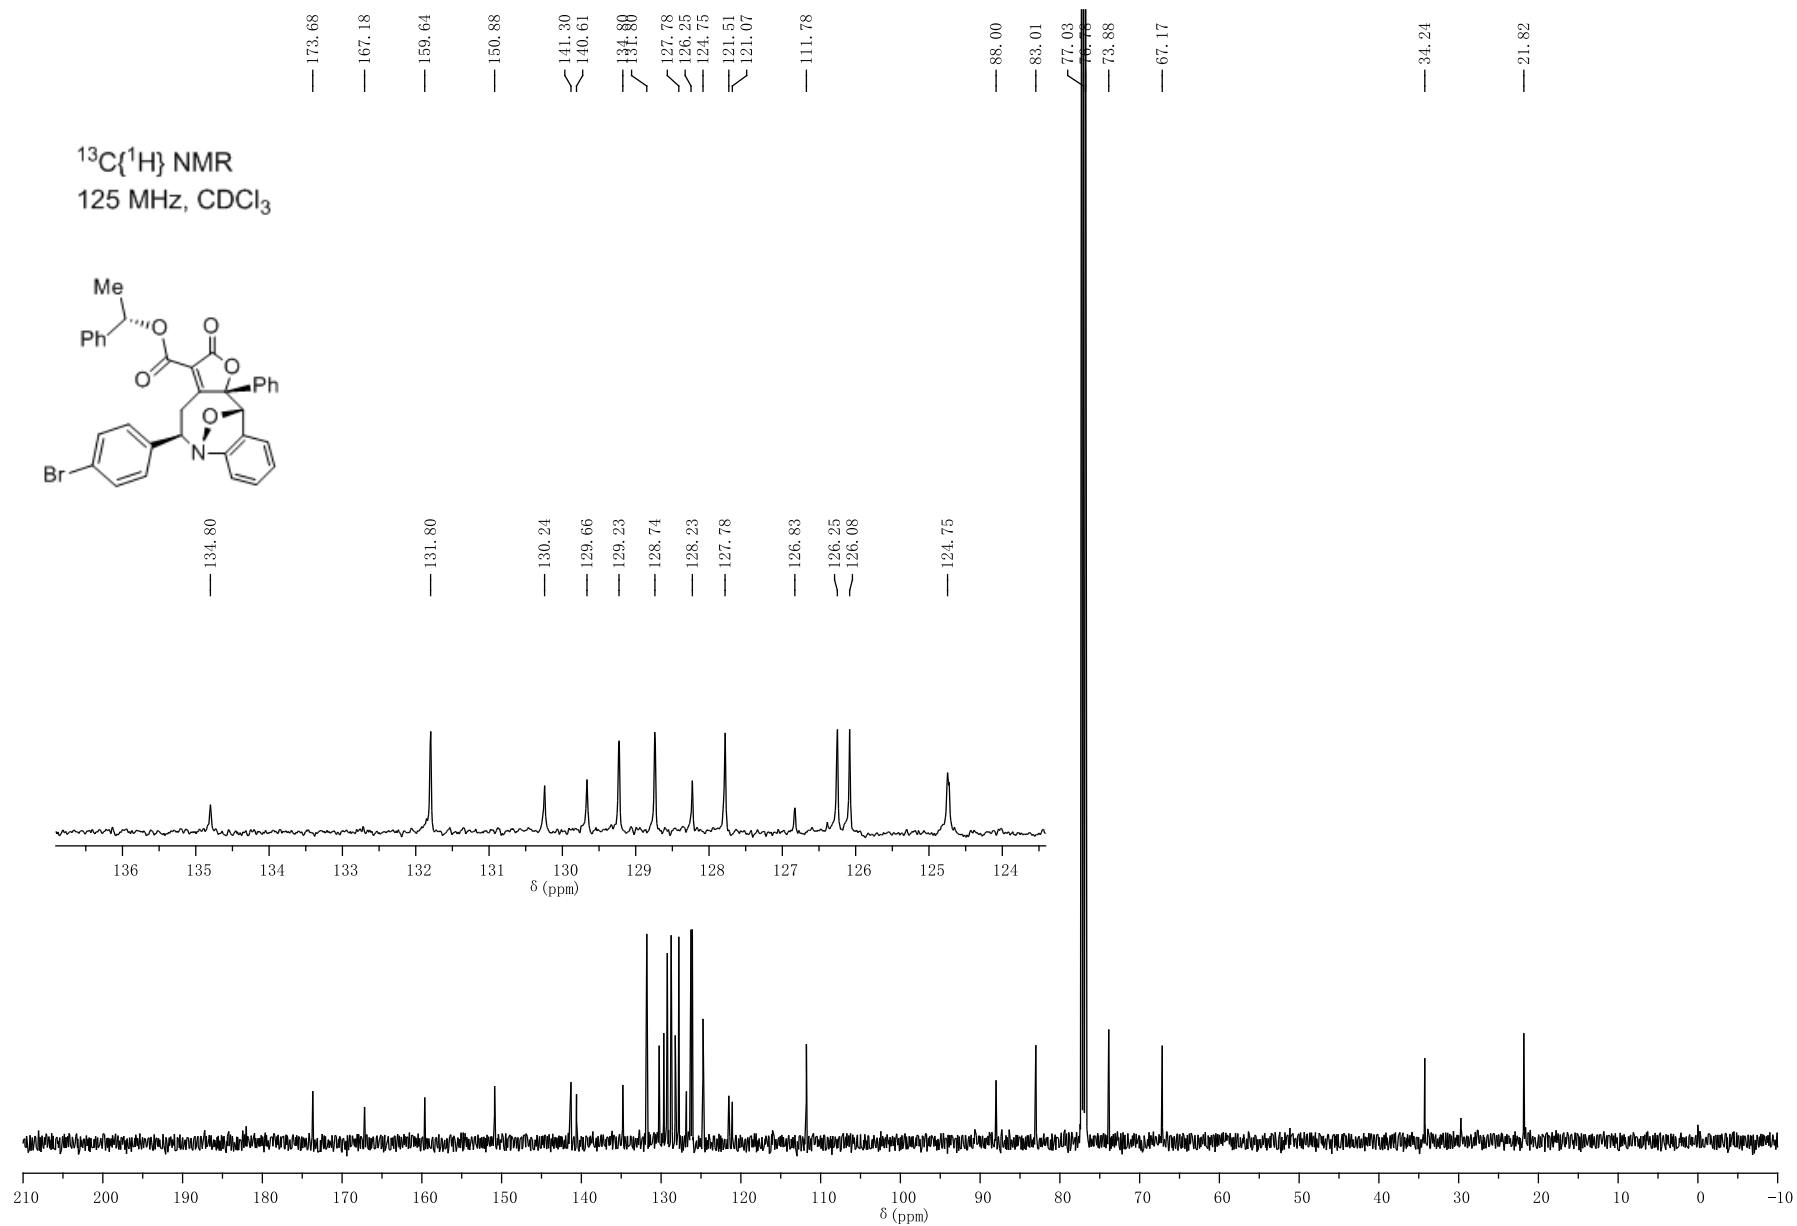



**Compound 3ab**

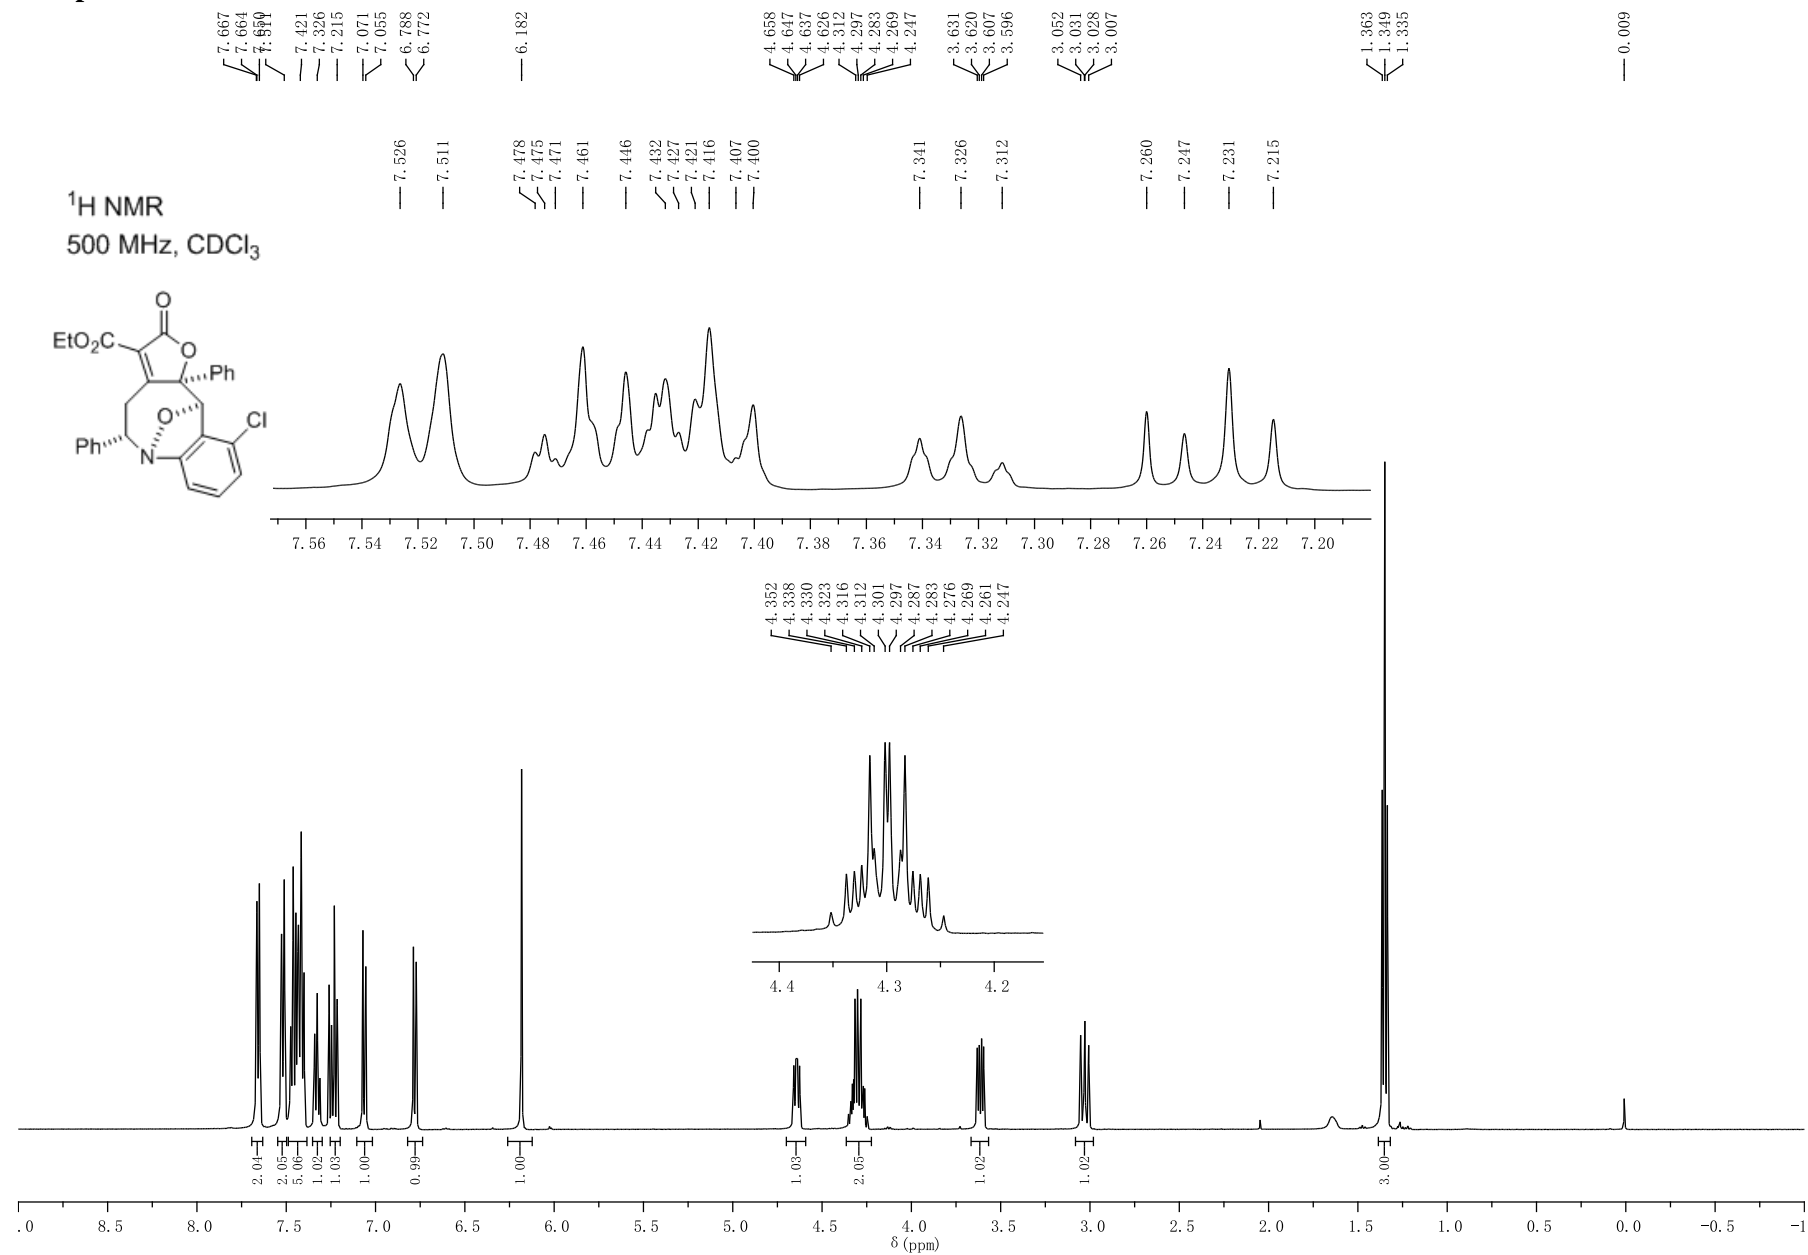

# Compound 3ab

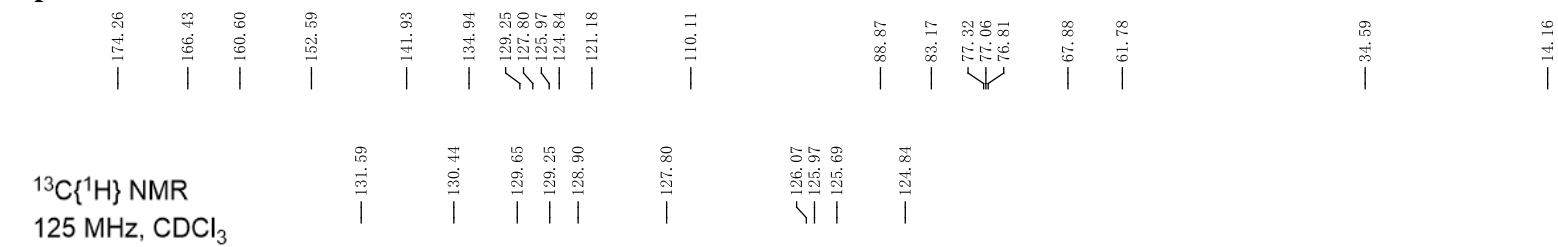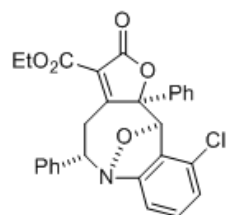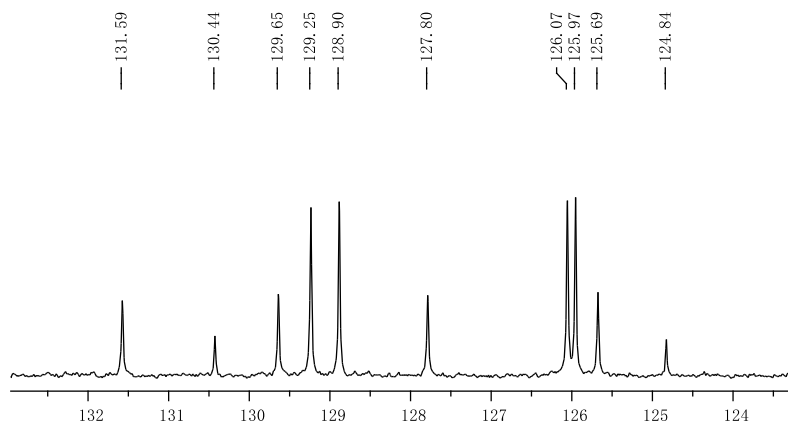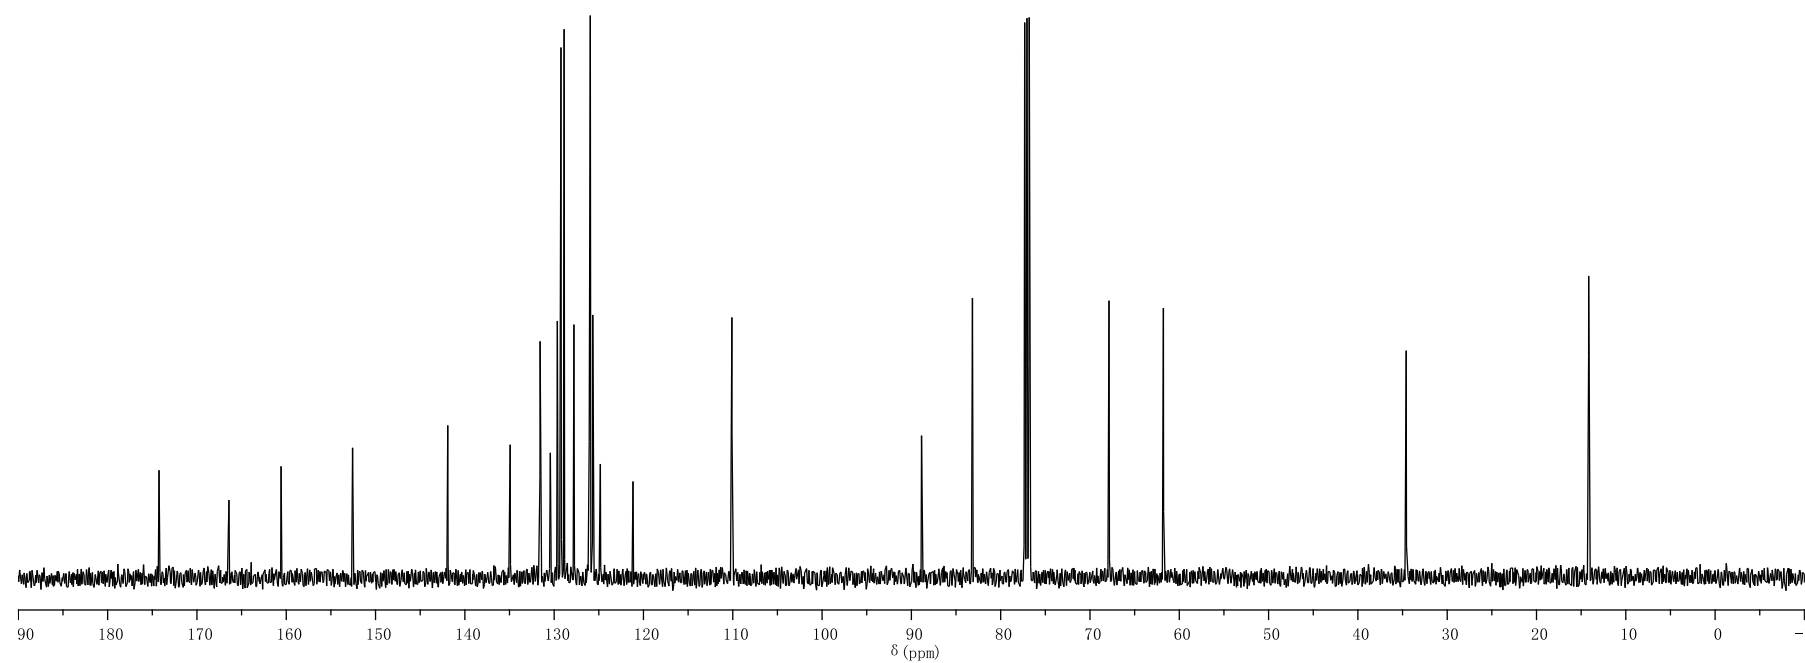

**Compound 3ac**

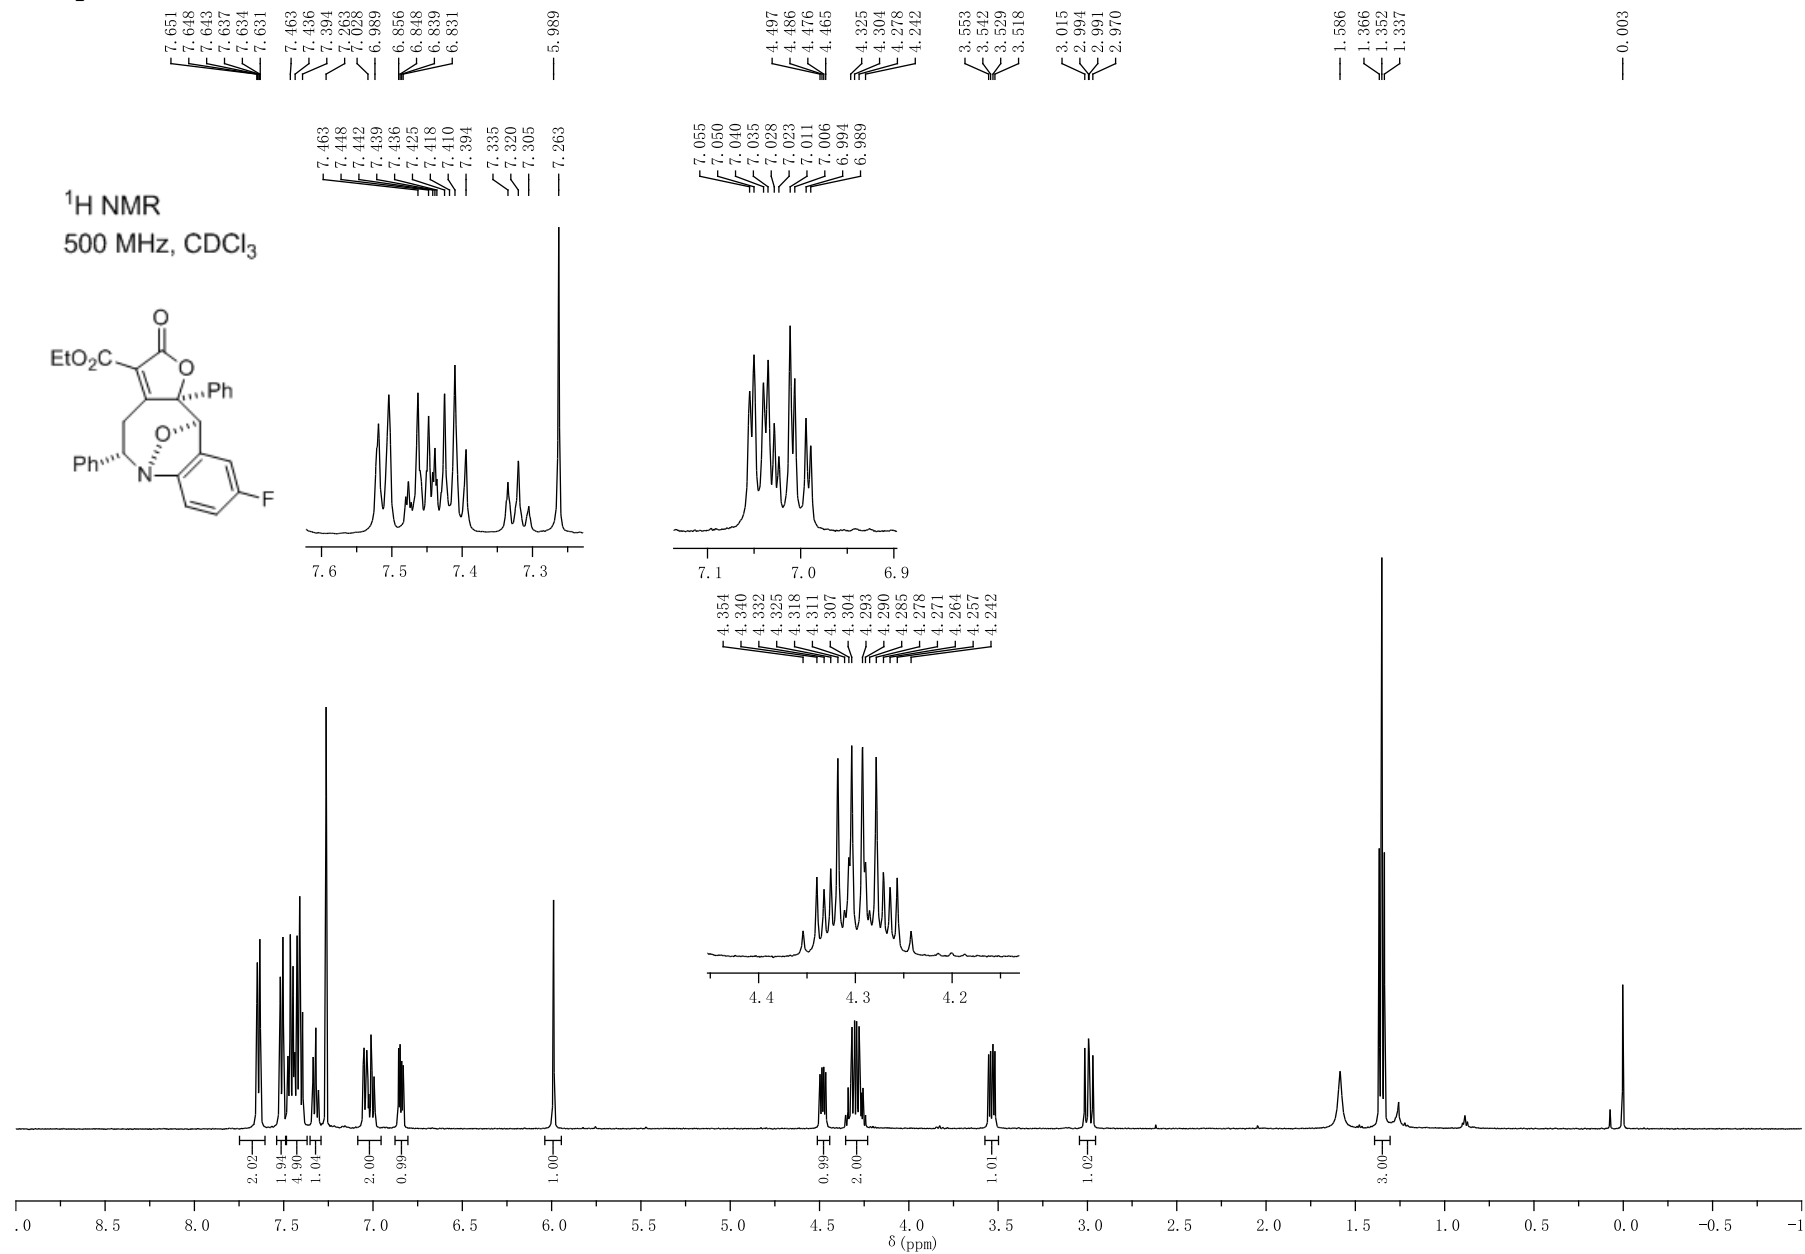

**Compound 3ac**

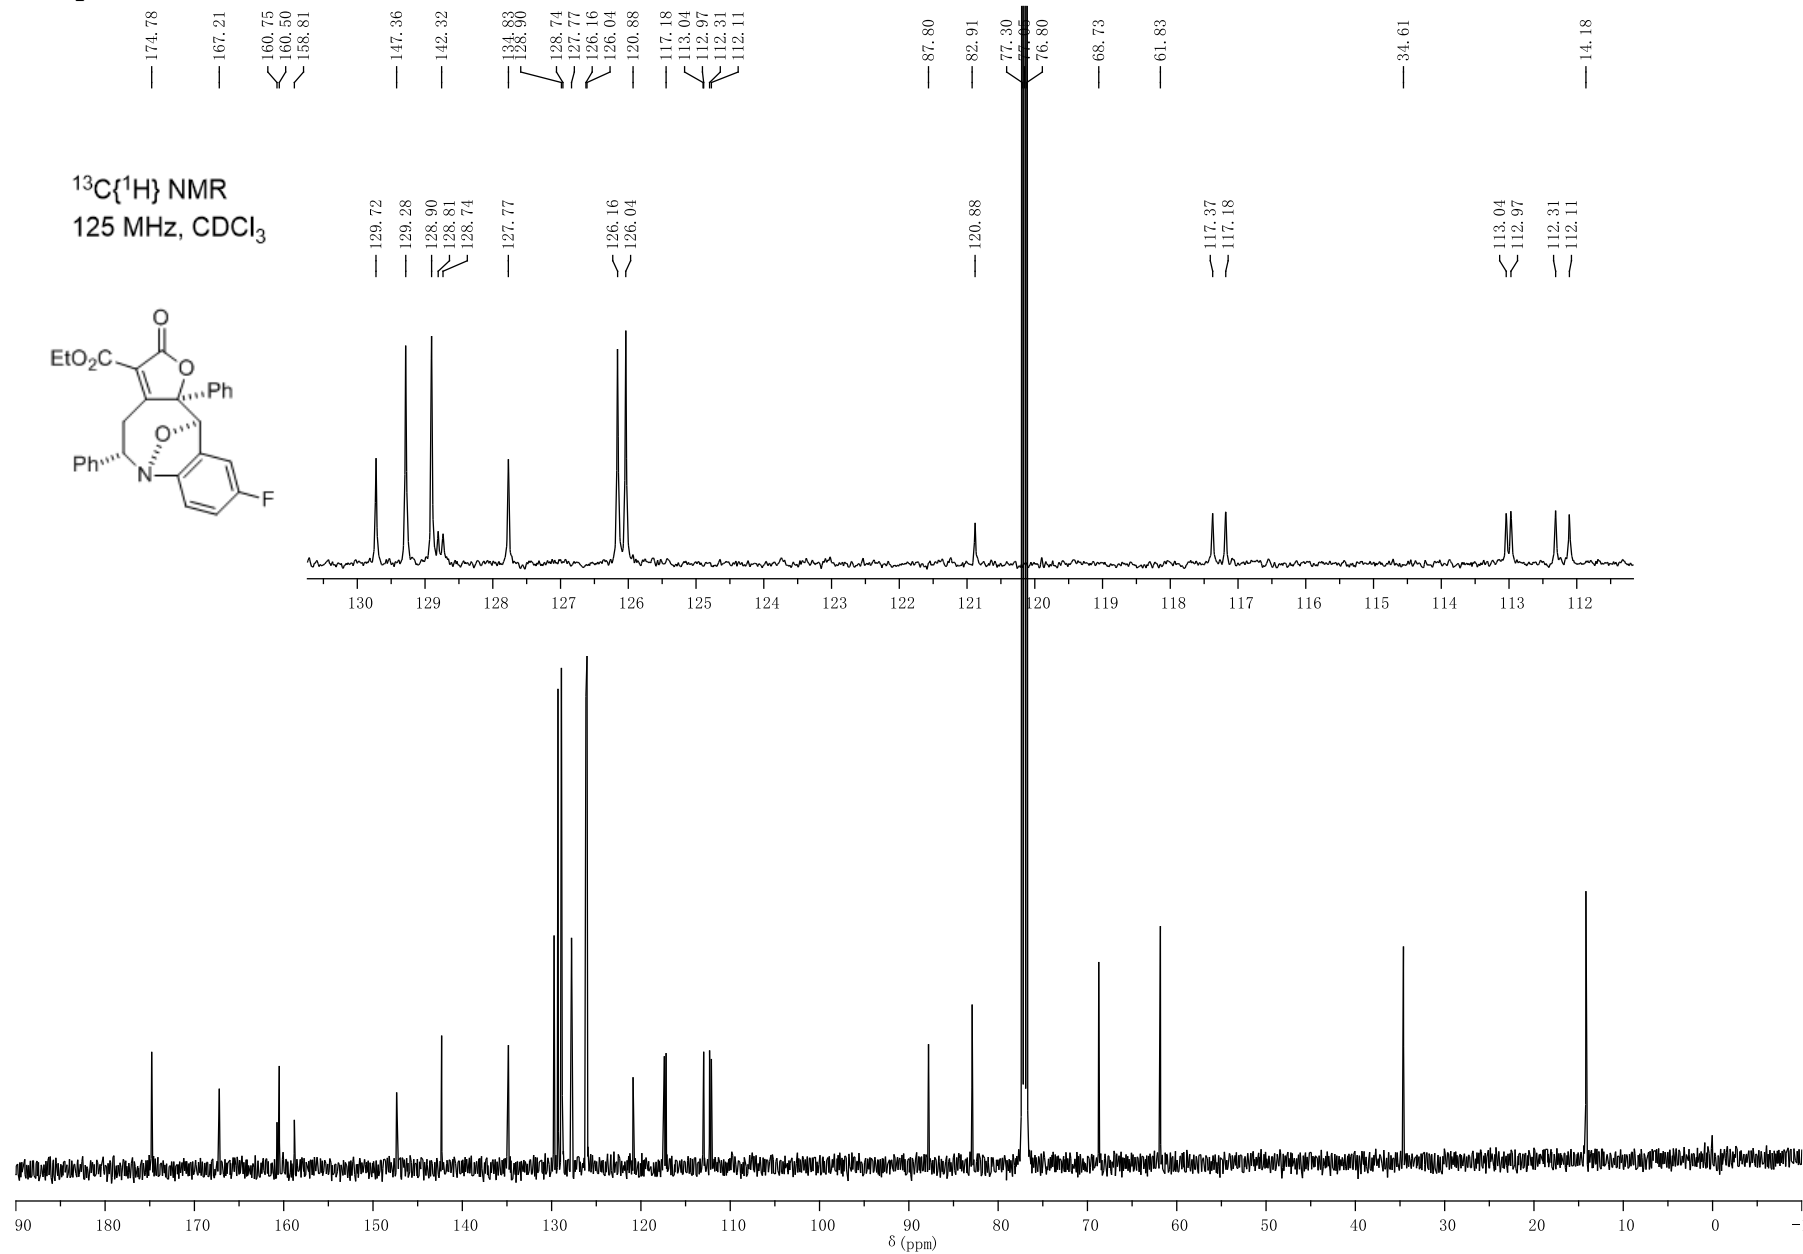

# Compound 3ac

$^{19}\text{F}$  NMR  
470 MHz,  $\text{CDCl}_3$

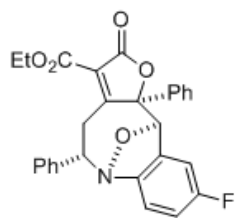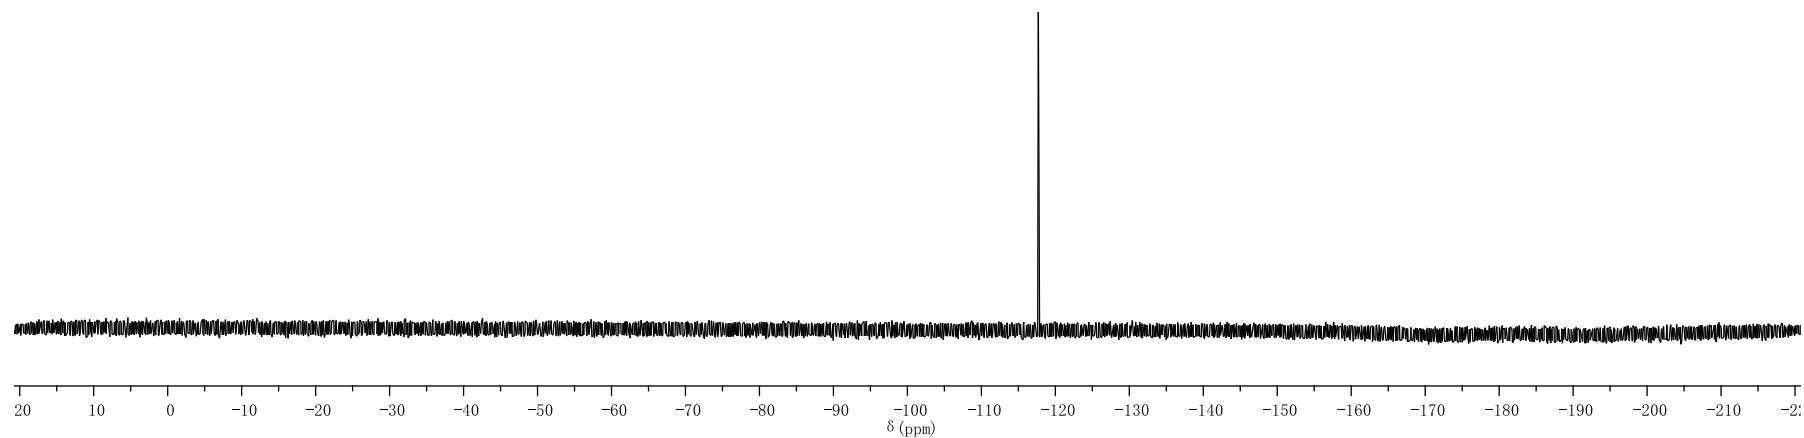

**Compound 3ad**

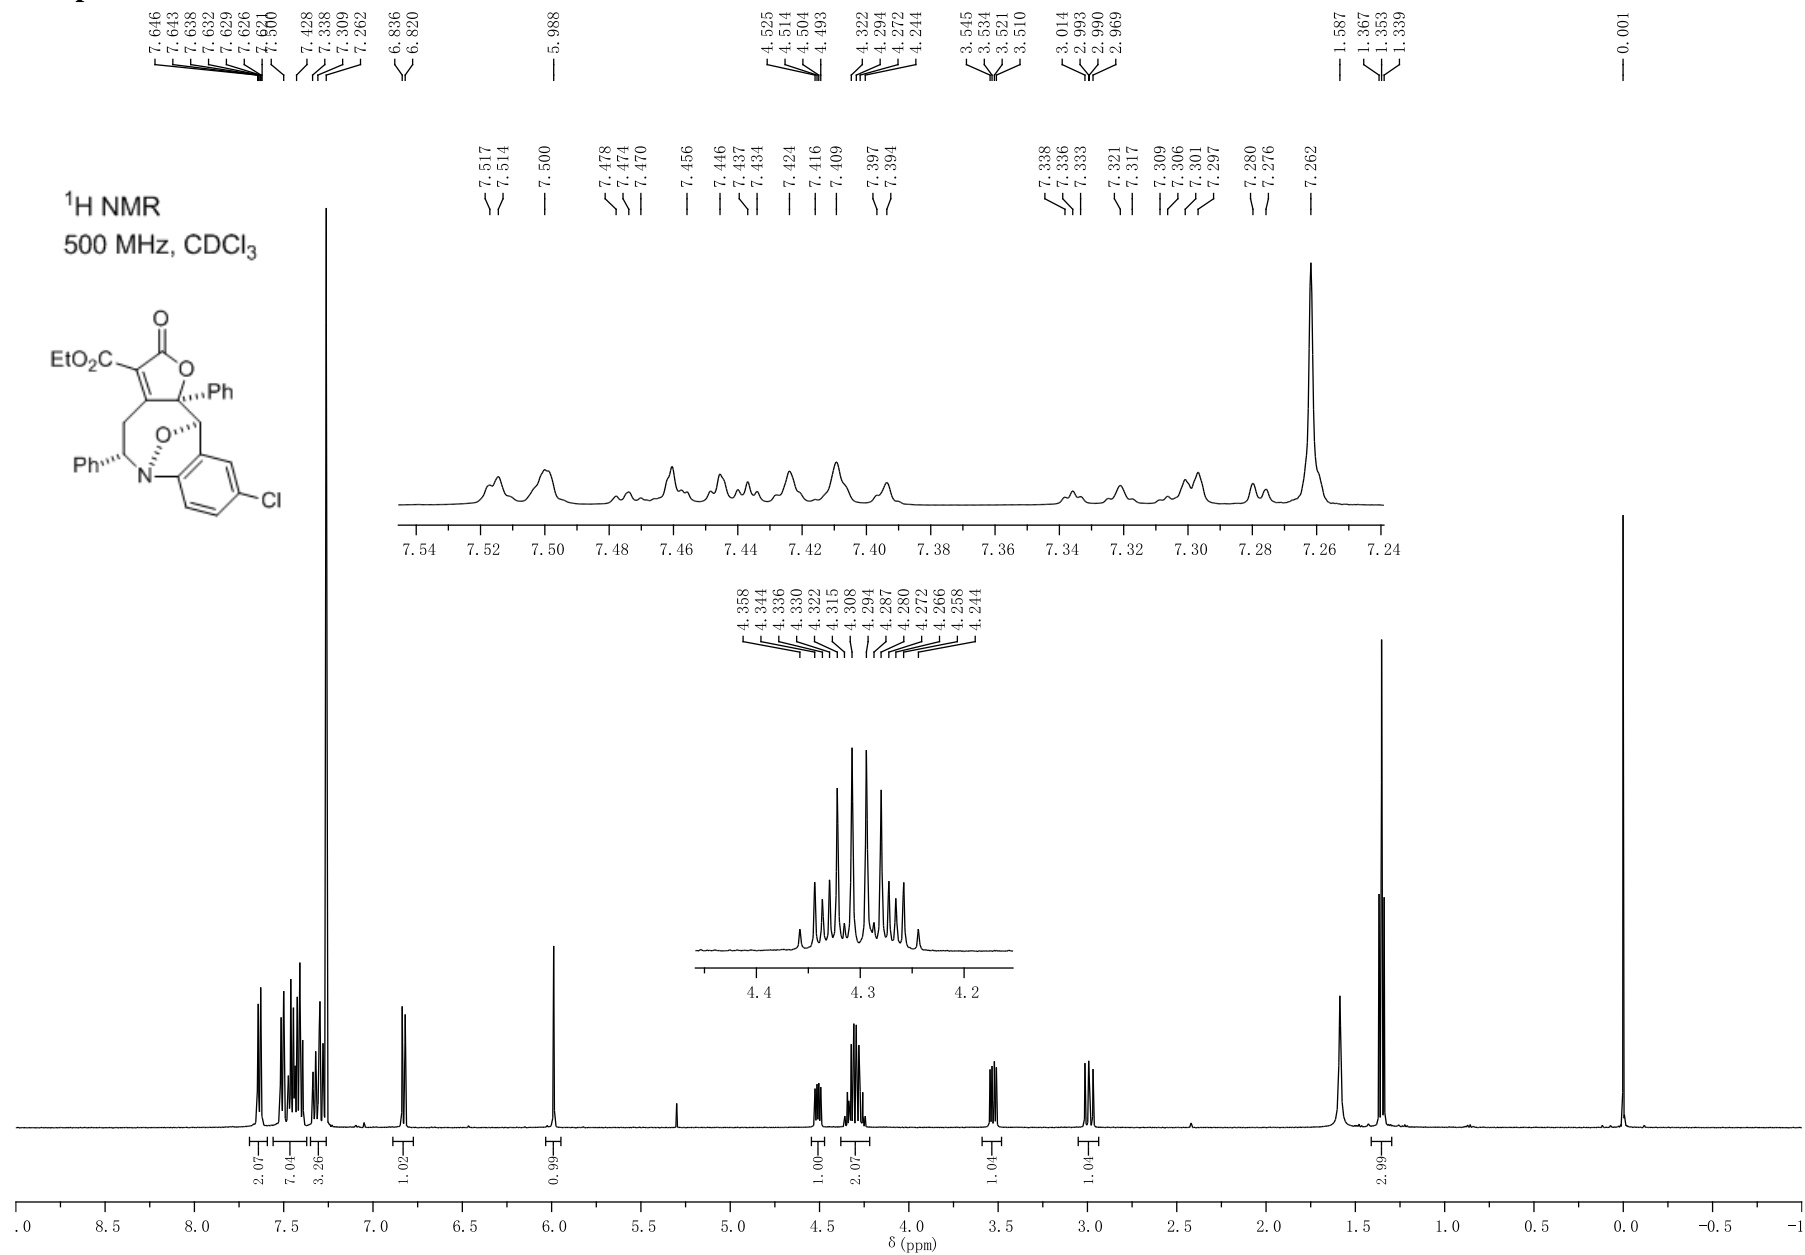

# Compound 3ad

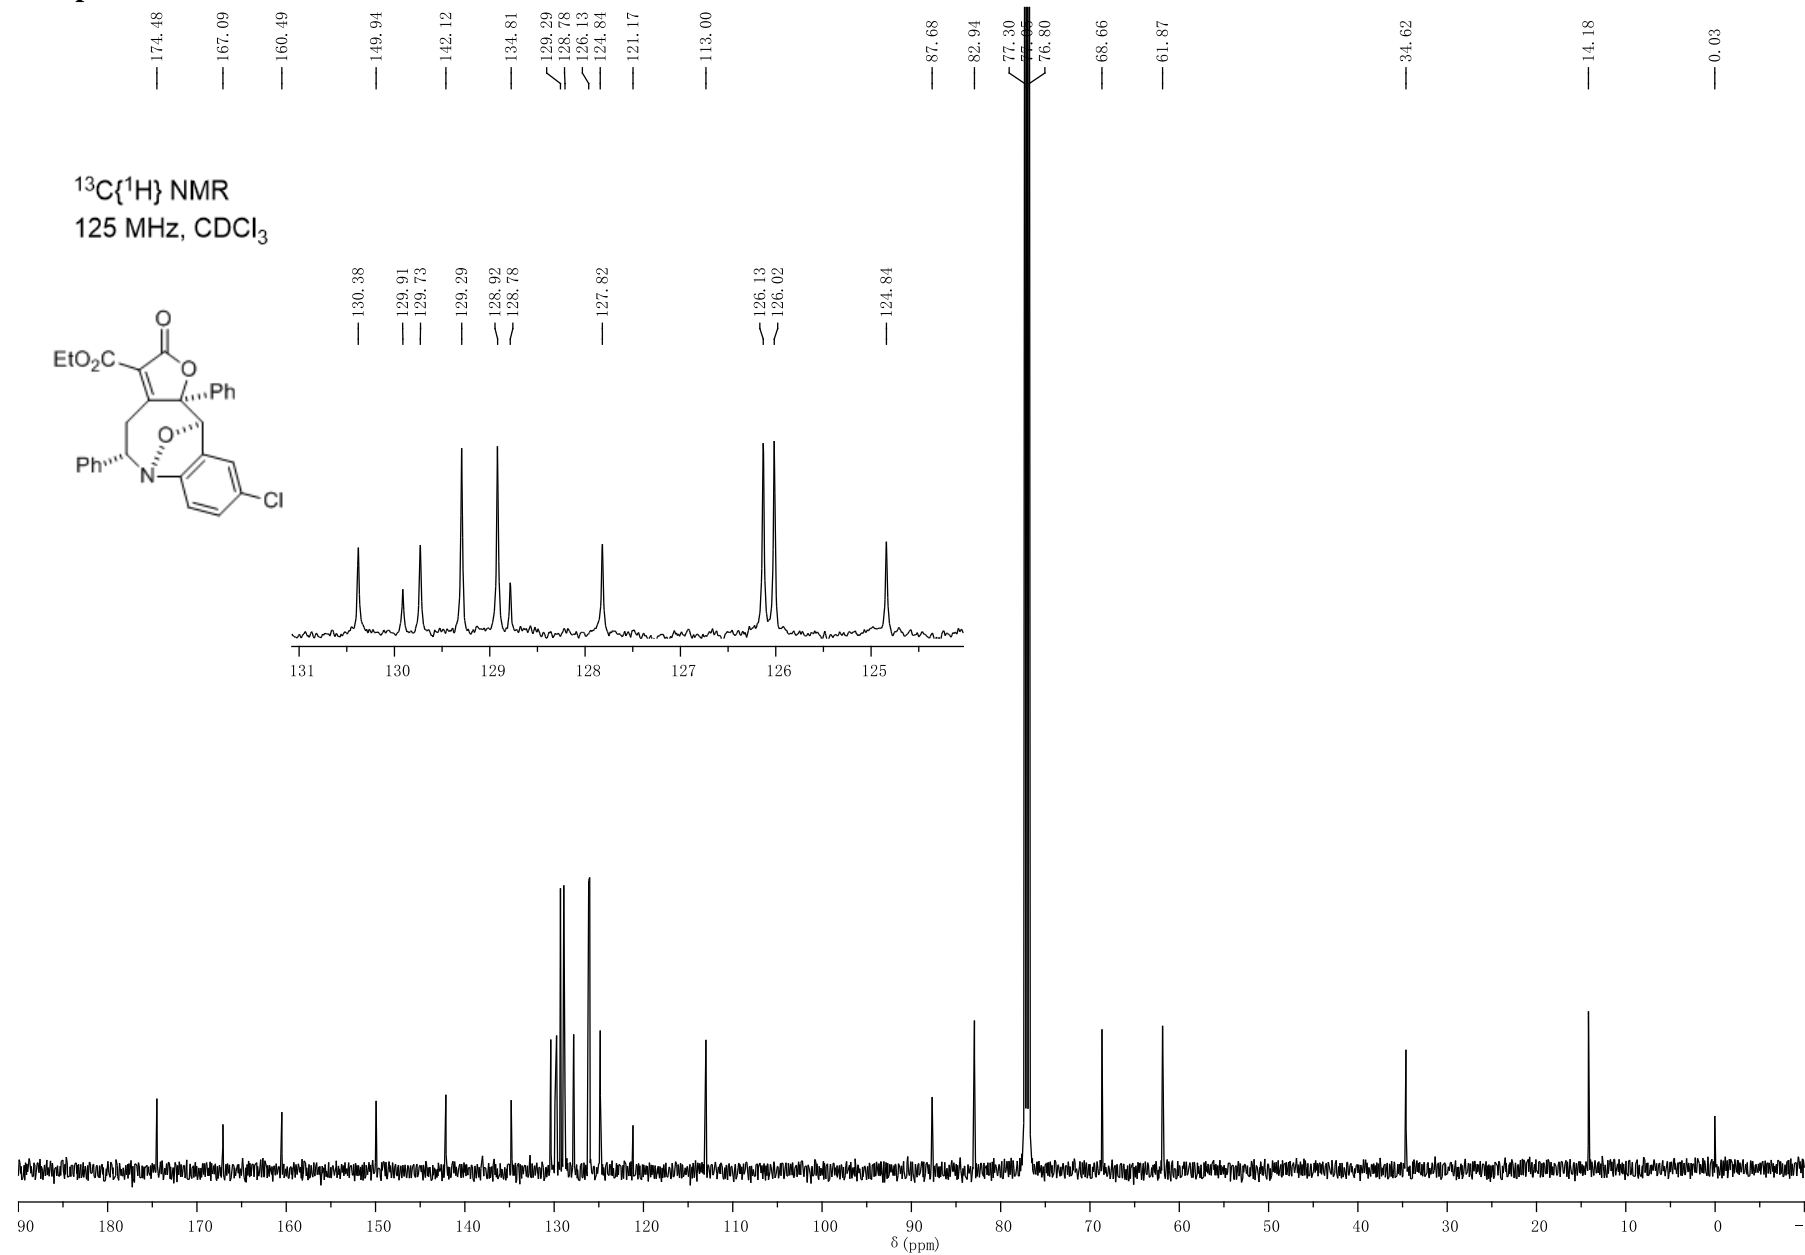

**Compound 3ae**

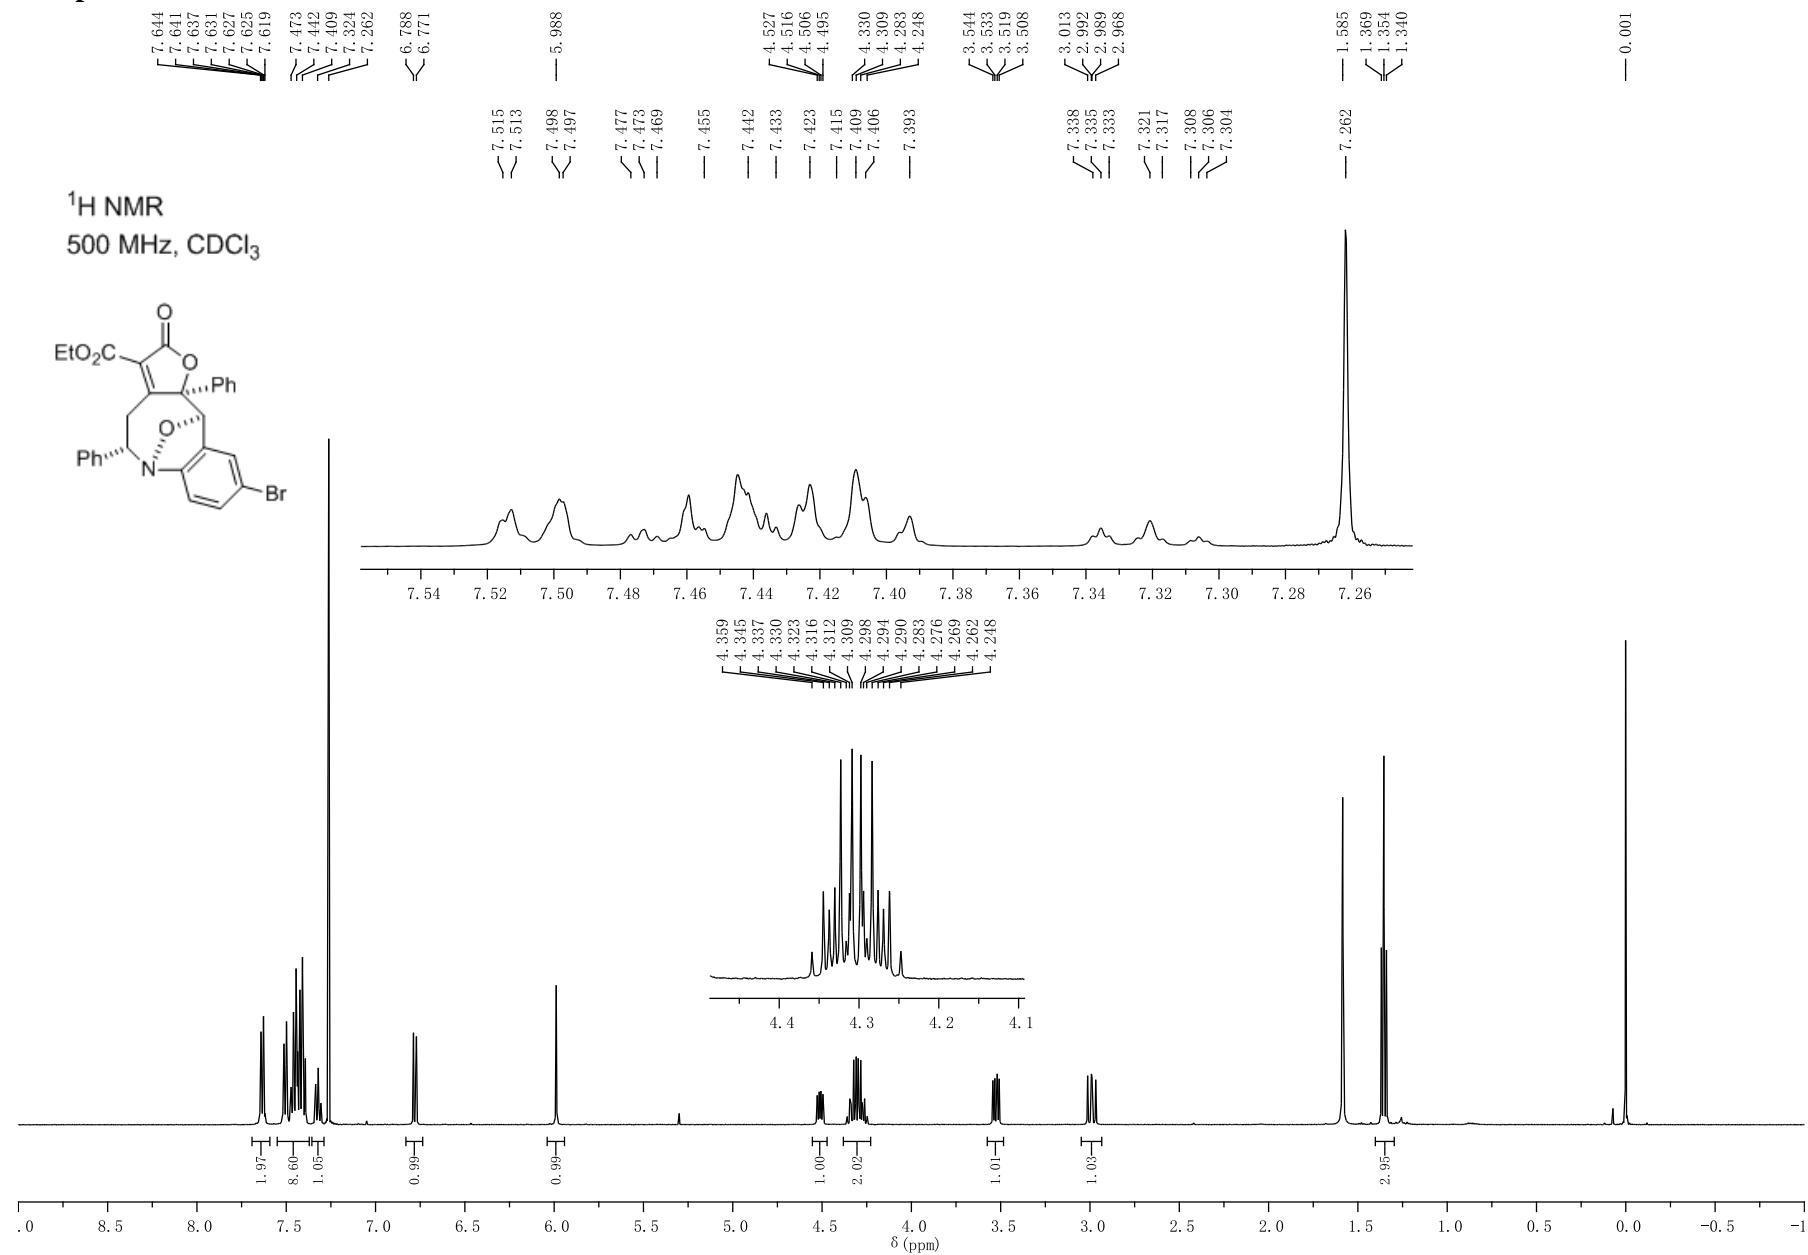



**Compound 3ae**

$^{13}\text{C}\{^1\text{H}\}$  NMR  
125 MHz,  $\text{CDCl}_3$

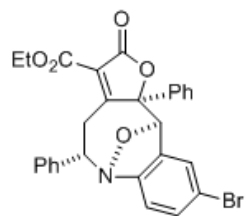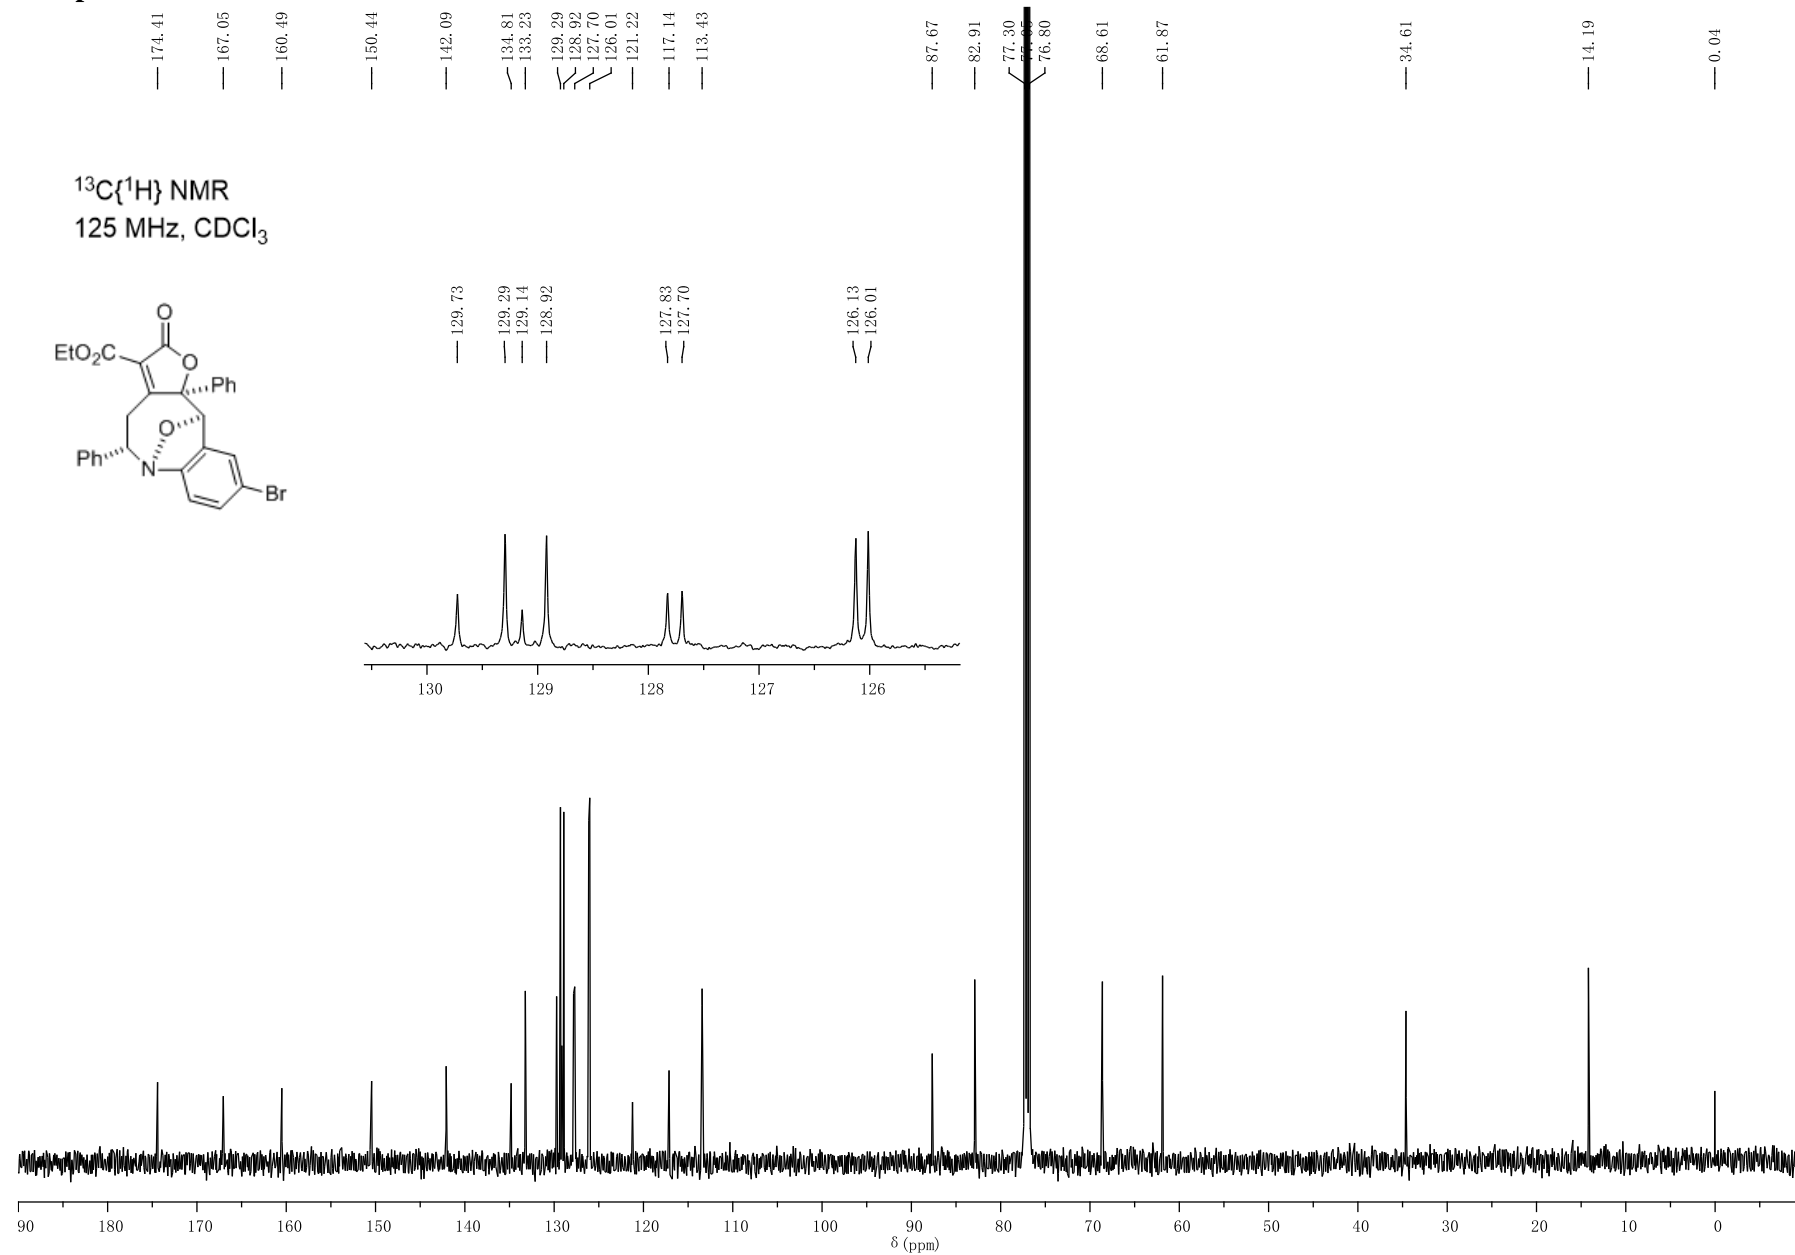

**Compound 3af**

7.667  
7.652  
7.526  
7.388  
7.263  
6.851  
6.839  
6.835  
6.818  
6.811  
6.806  
6.799  
5.972

4.423  
4.324  
4.317  
4.310  
4.302  
4.284  
4.276  
4.270  
4.262  
4.255  
4.248  
4.234

3.786  
3.522  
3.511  
3.498  
3.487  
3.000  
2.978  
2.976  
2.955

1.656  
1.363  
1.349  
1.335

0.007

7.667

7.652

7.526

7.511

7.473

7.459

7.443

7.433

7.419

7.404

7.388

7.325

7.310

7.295

7.263

<sup>1</sup>H NMR  
500 MHz, CDCl<sub>3</sub>

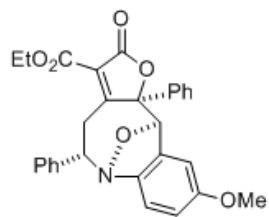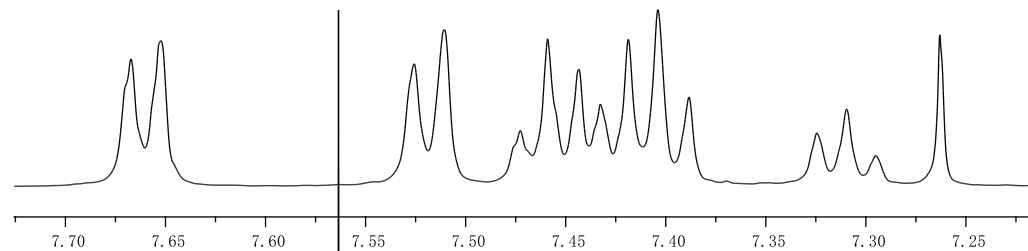

4.444  
4.432  
4.423  
4.412  
4.353  
4.338  
4.331  
4.324  
4.317  
4.310  
4.302  
4.284  
4.276  
4.270  
4.262  
4.255  
4.248  
4.234

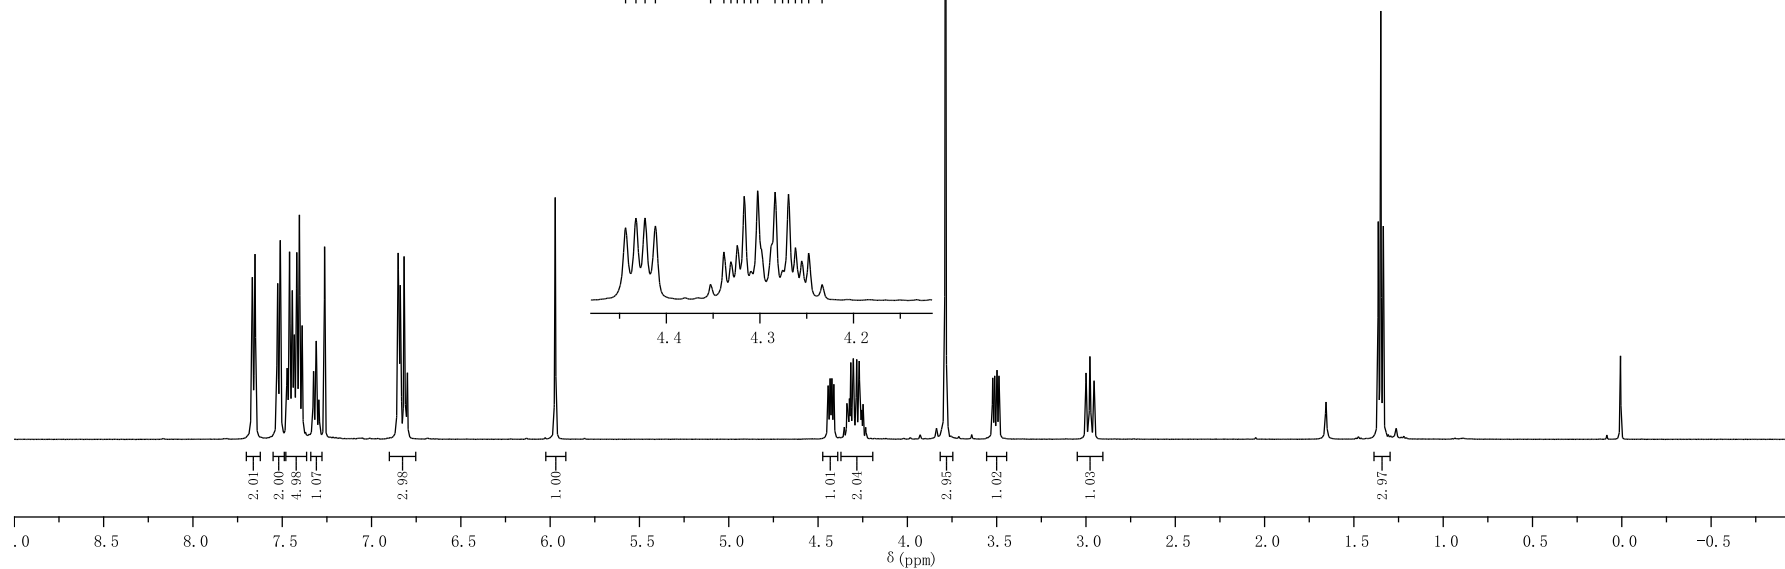

# Compound 3af

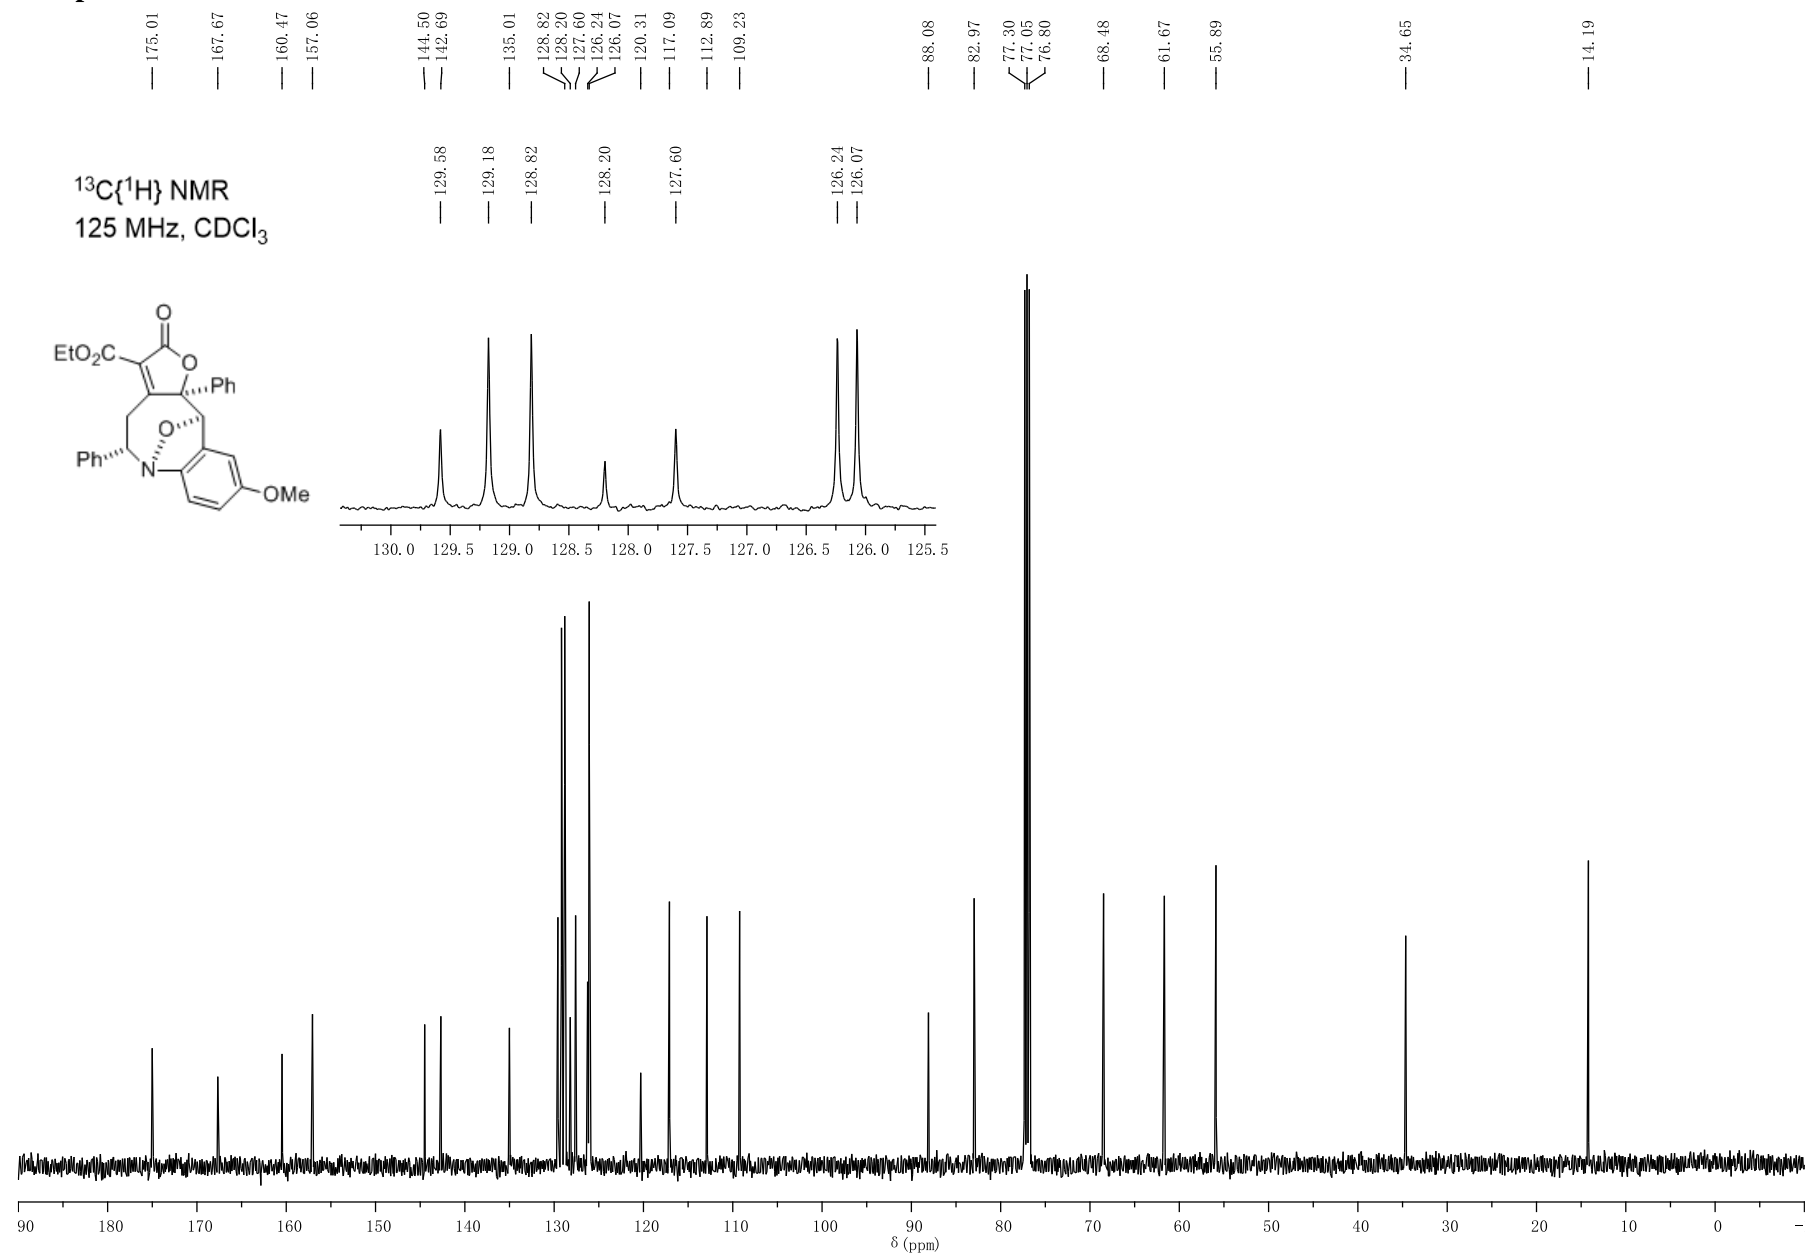



**Compound 3ag**

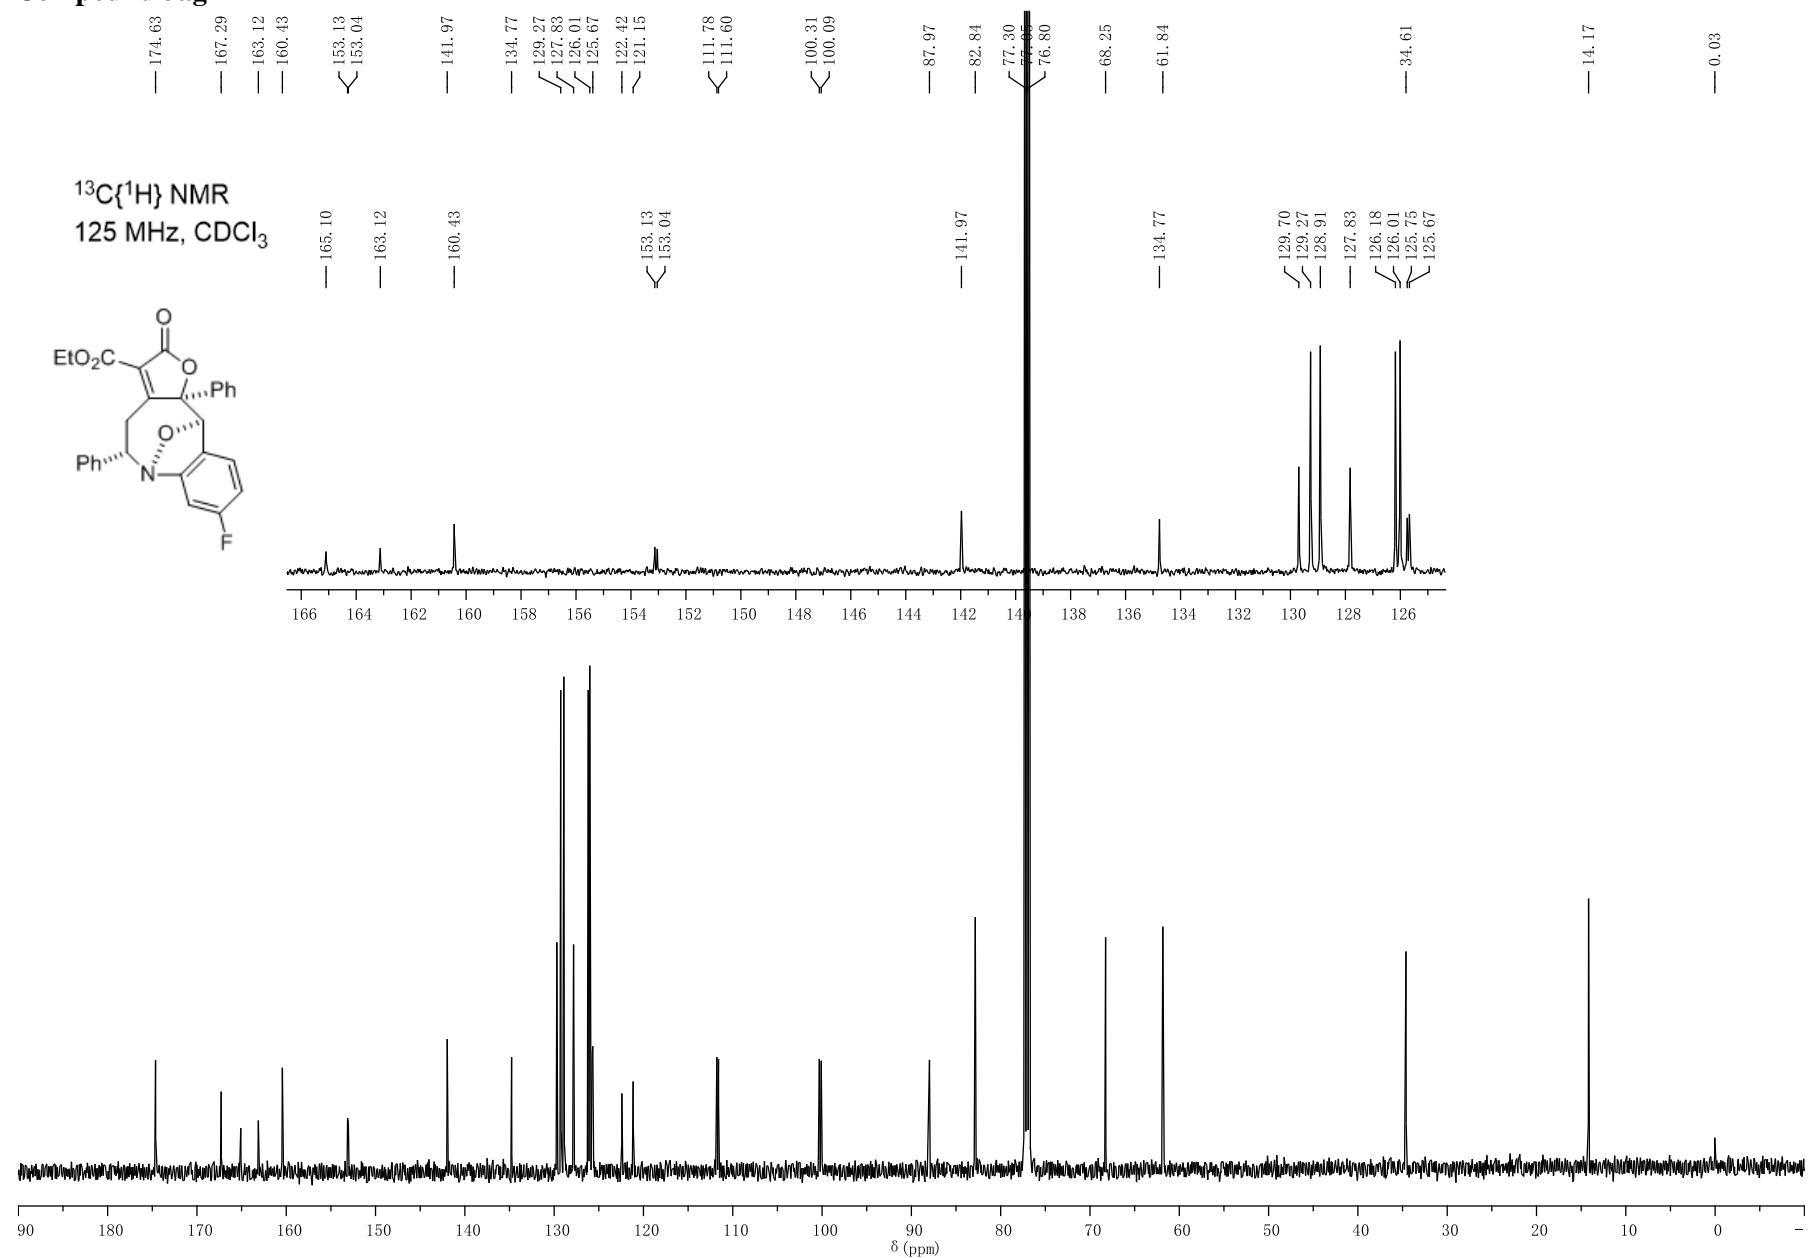

# Compound 3ag

$^{19}\text{F}$  NMR  
470 MHz,  $\text{CDCl}_3$

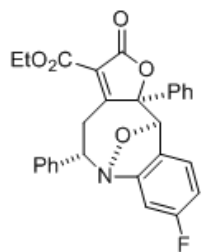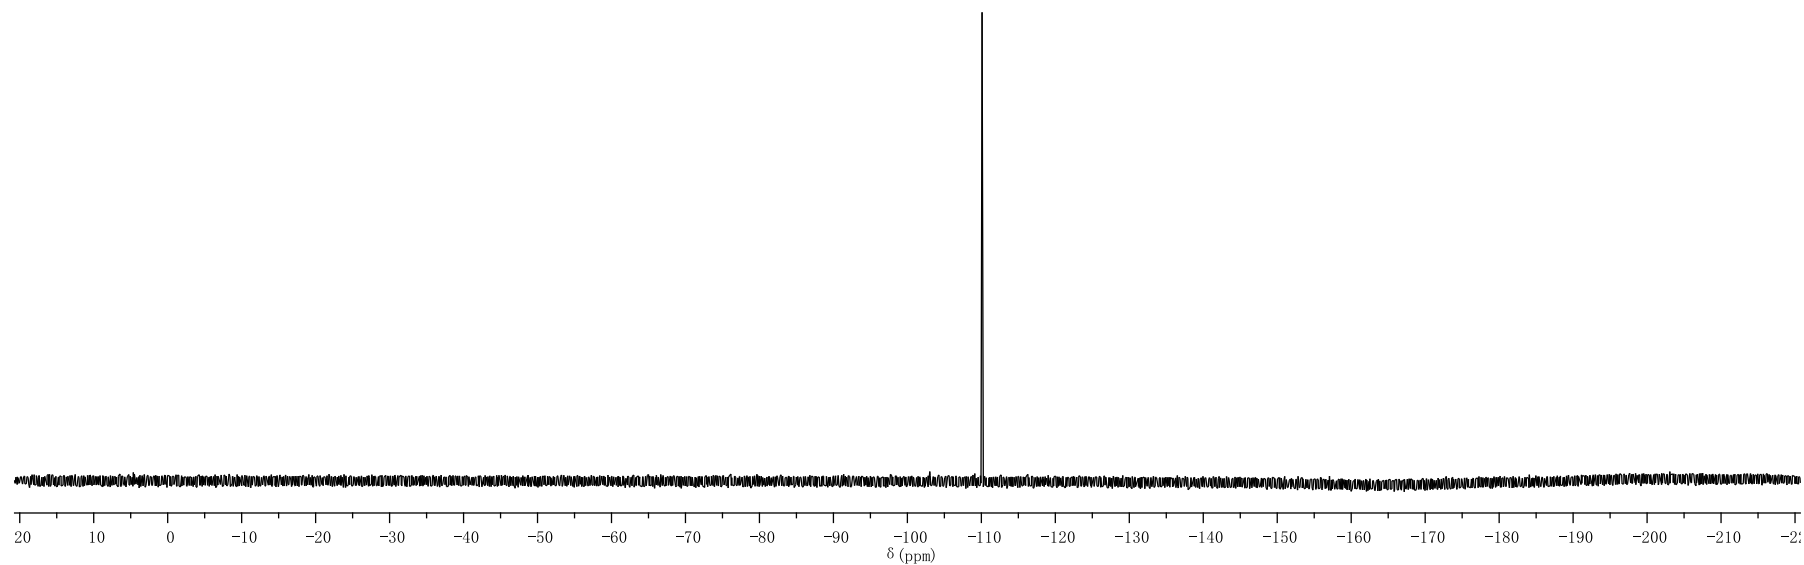

**Compound 3ah**

<sup>1</sup>H NMR  
500 MHz, CDCl<sub>3</sub>

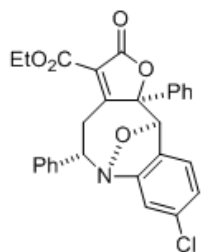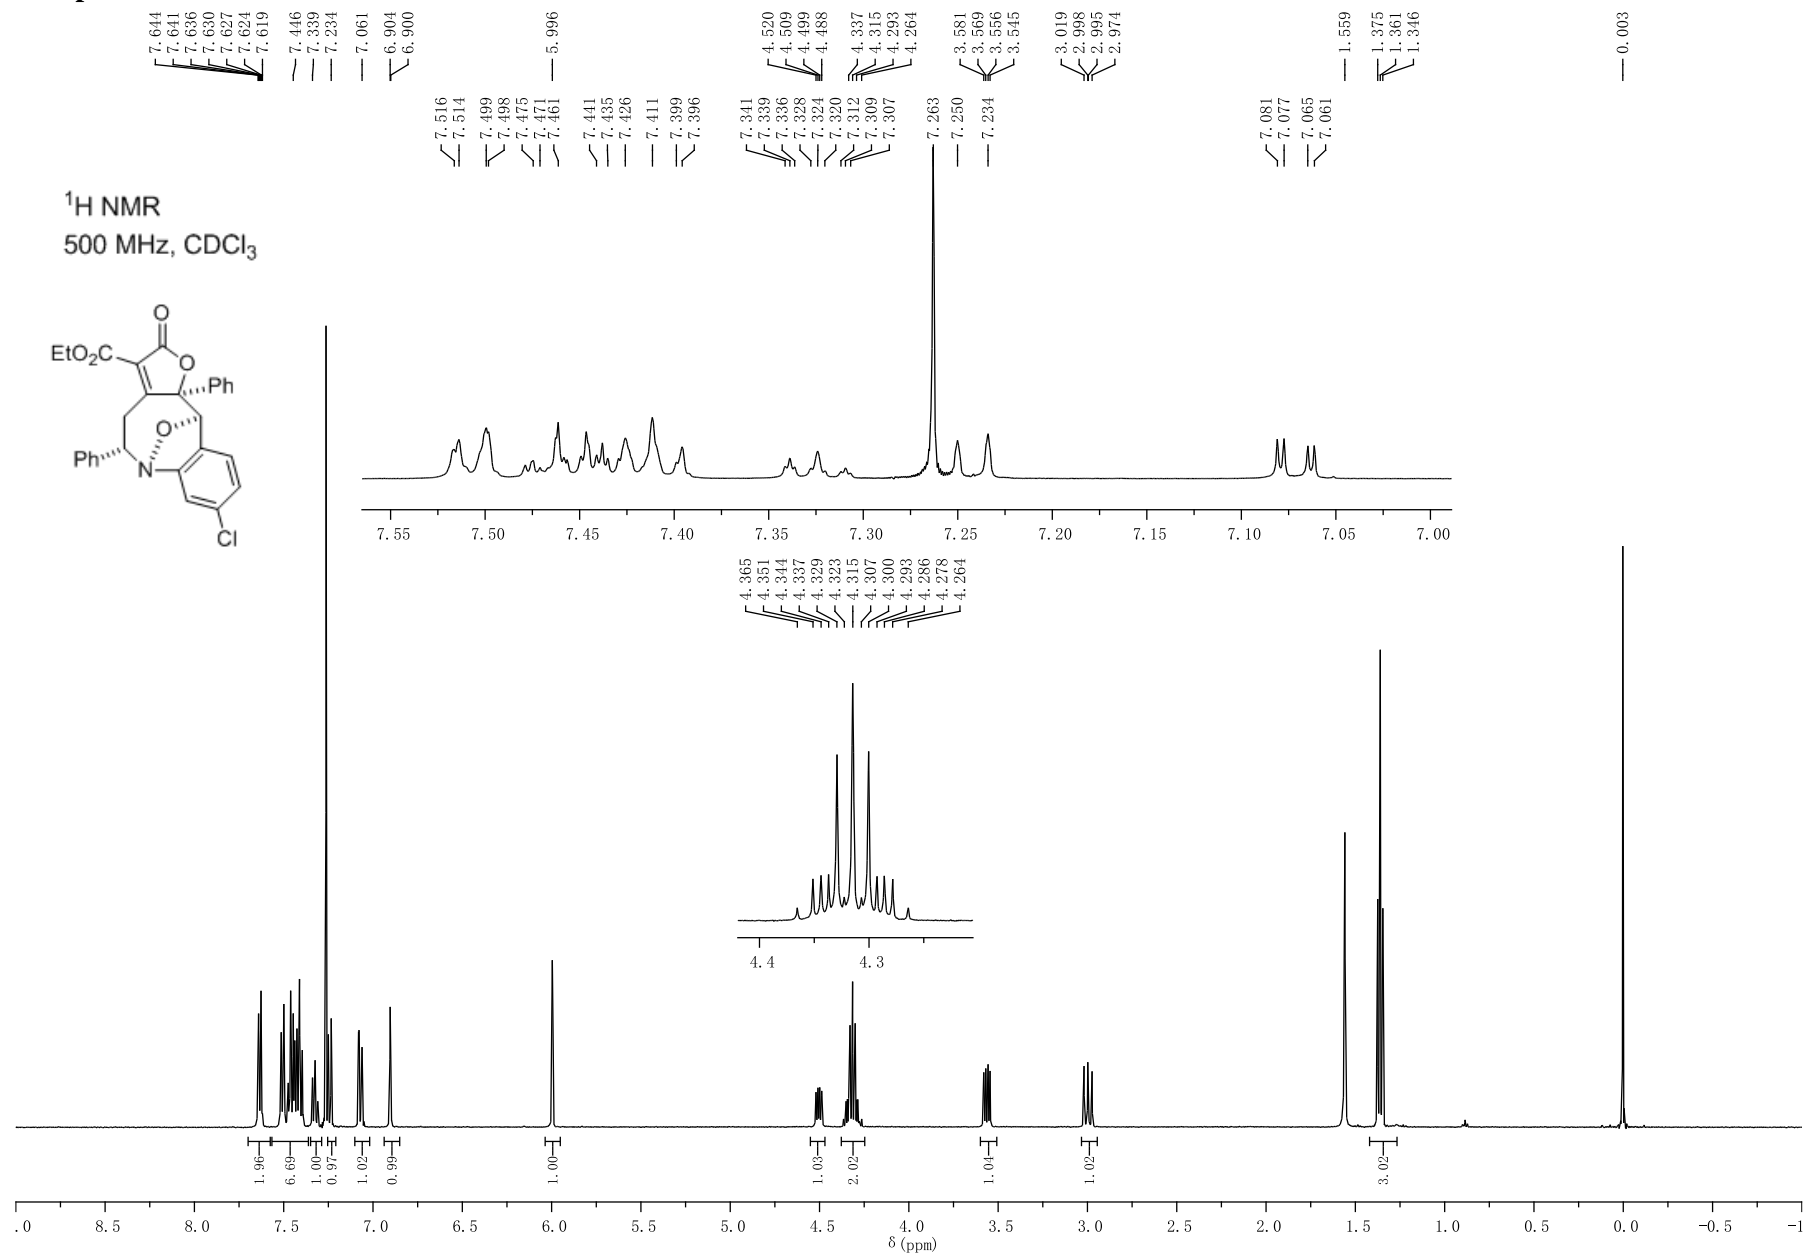

# Compound 3ah

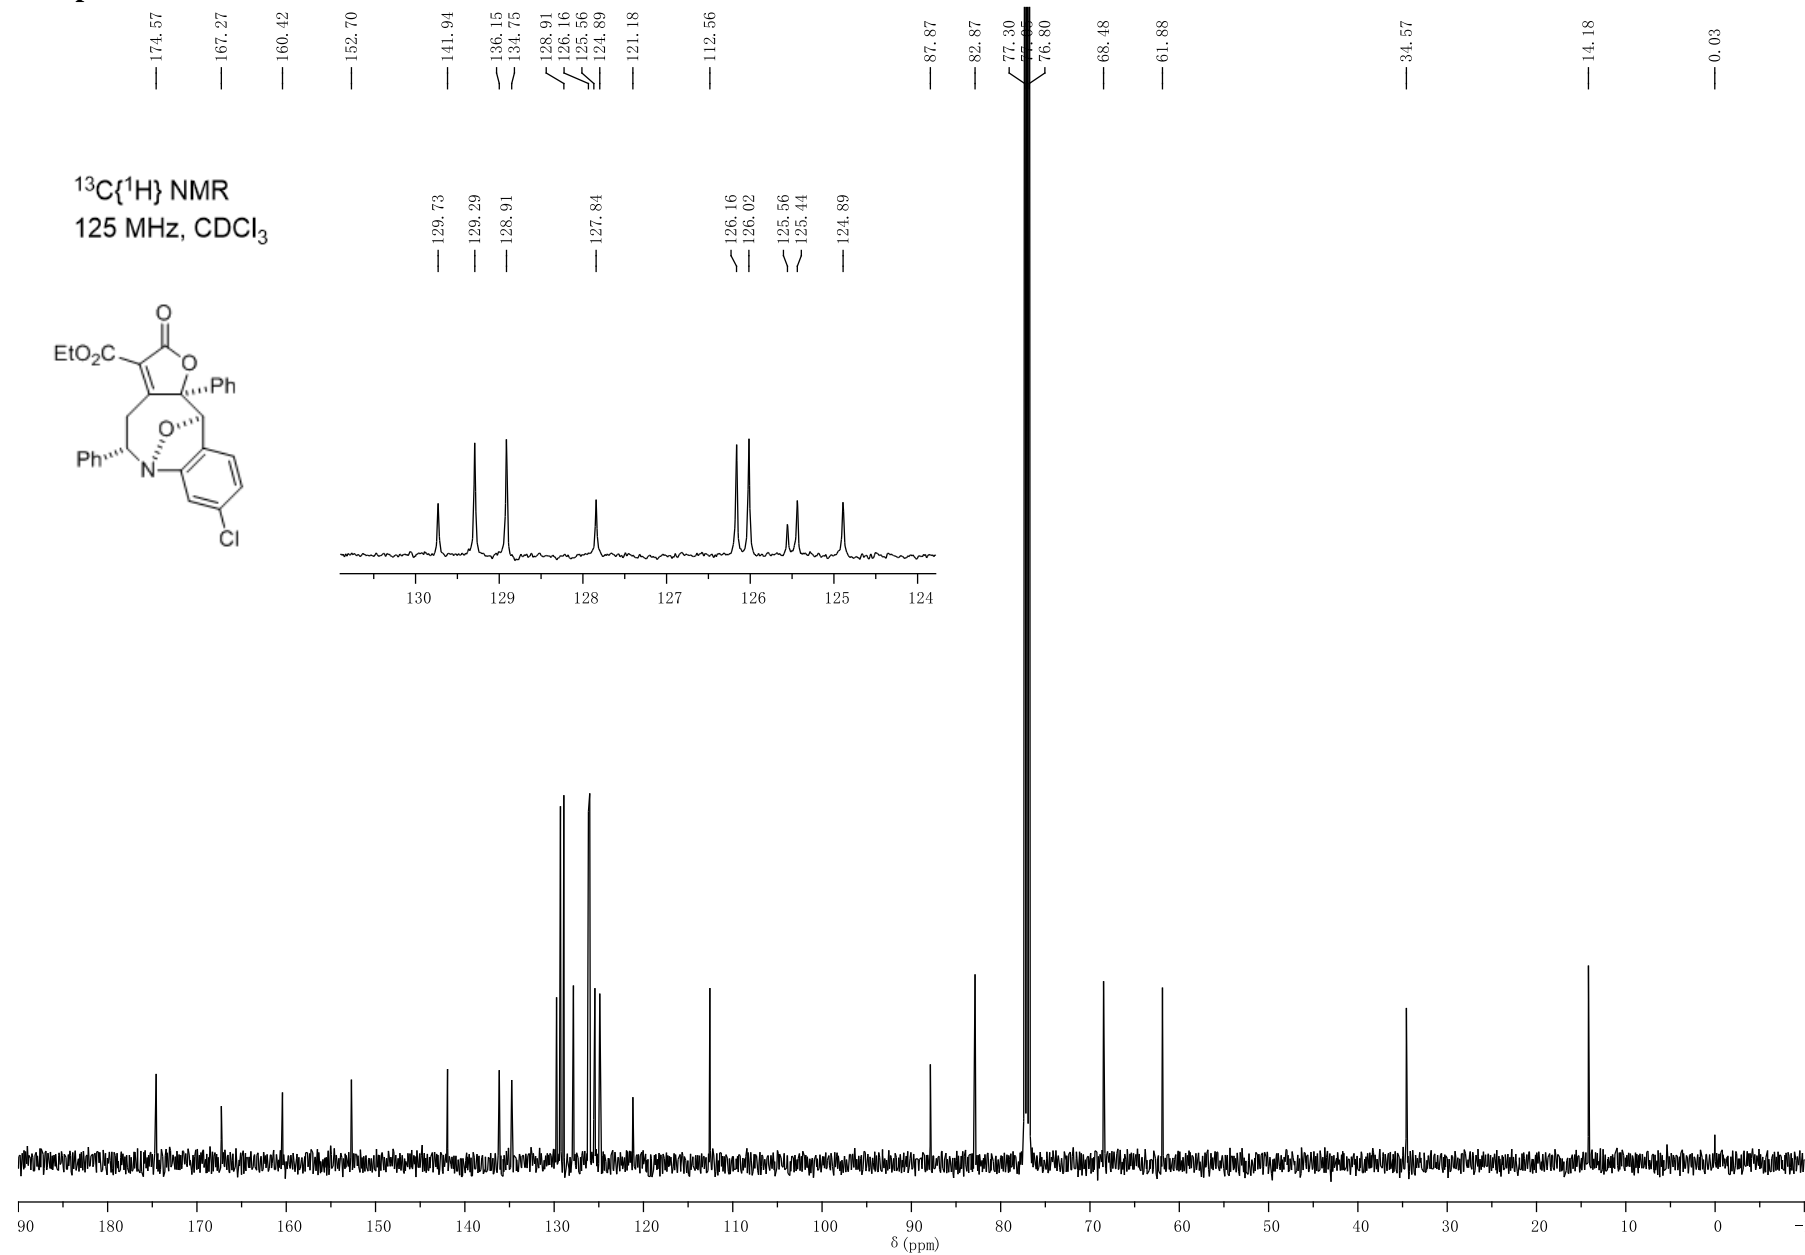



**Compound 3ai**

7.640  
7.625  
7.515  
7.499  
7.476  
7.461  
7.446  
7.439  
7.425  
7.411  
7.396  
7.640  
7.625

7.515  
7.499  
7.476  
7.461  
7.446  
7.439  
7.425  
7.411  
7.396

7.338  
7.324  
7.309

7.264  
7.229  
7.213  
7.189  
7.174

7.061

4.519  
4.508  
4.498  
4.487

4.320  
4.306  
4.291  
4.284

3.585  
3.574  
3.561  
3.550

3.017  
2.995  
2.972

1.585  
1.381  
1.367  
1.353

0.006

<sup>1</sup>H NMR  
500 MHz, CDCl<sub>3</sub>

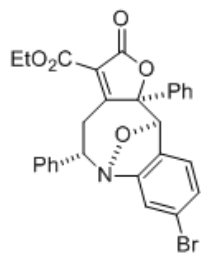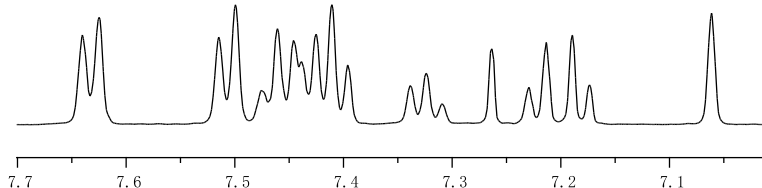

4.356  
4.348  
4.334  
4.320  
4.306  
4.291  
4.284

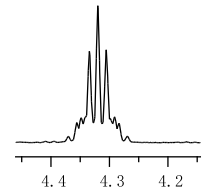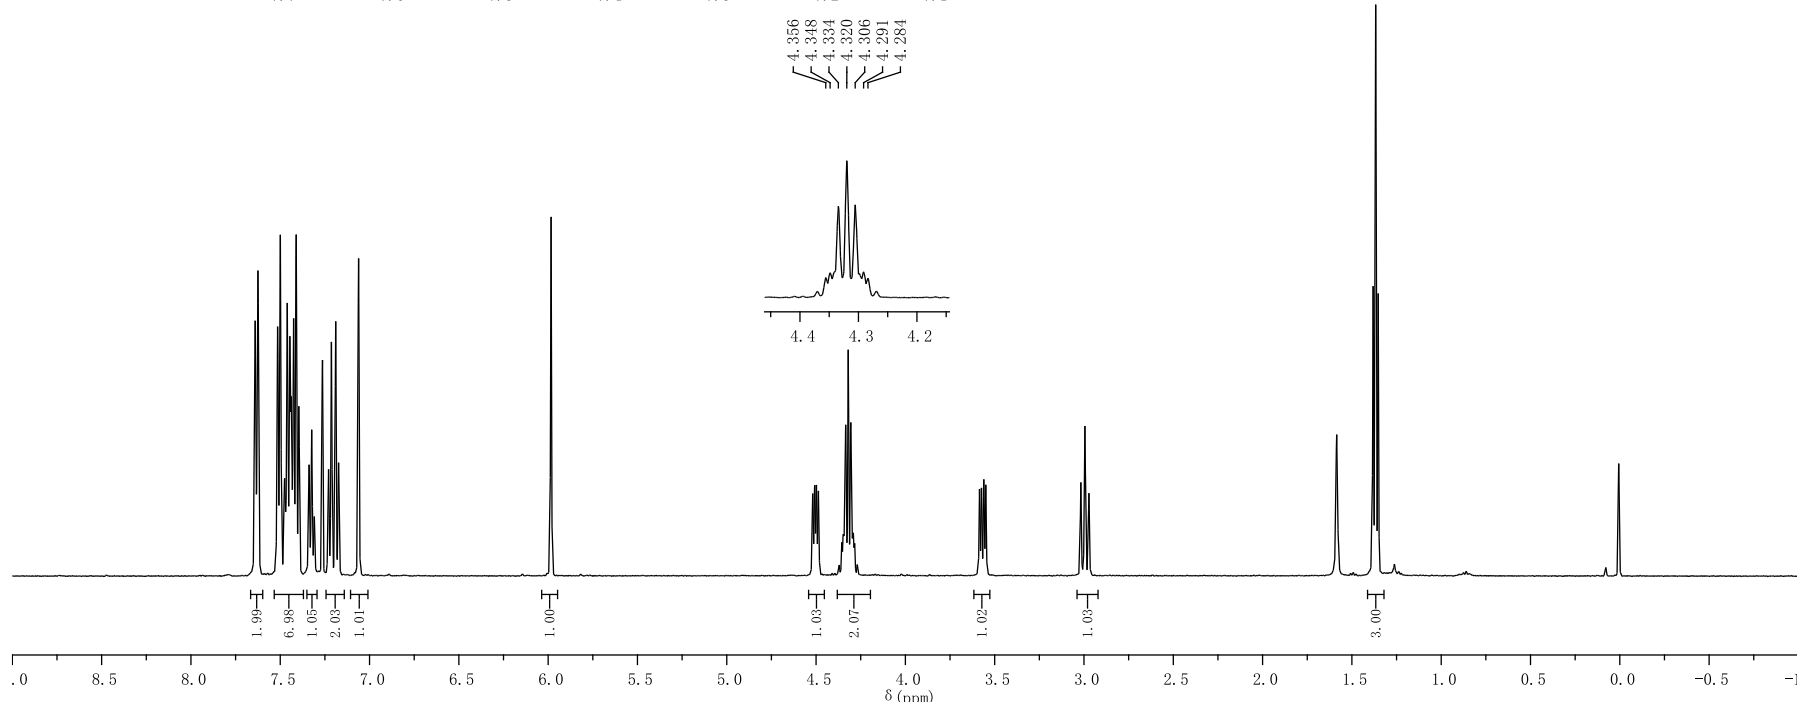

# Compound 3ai

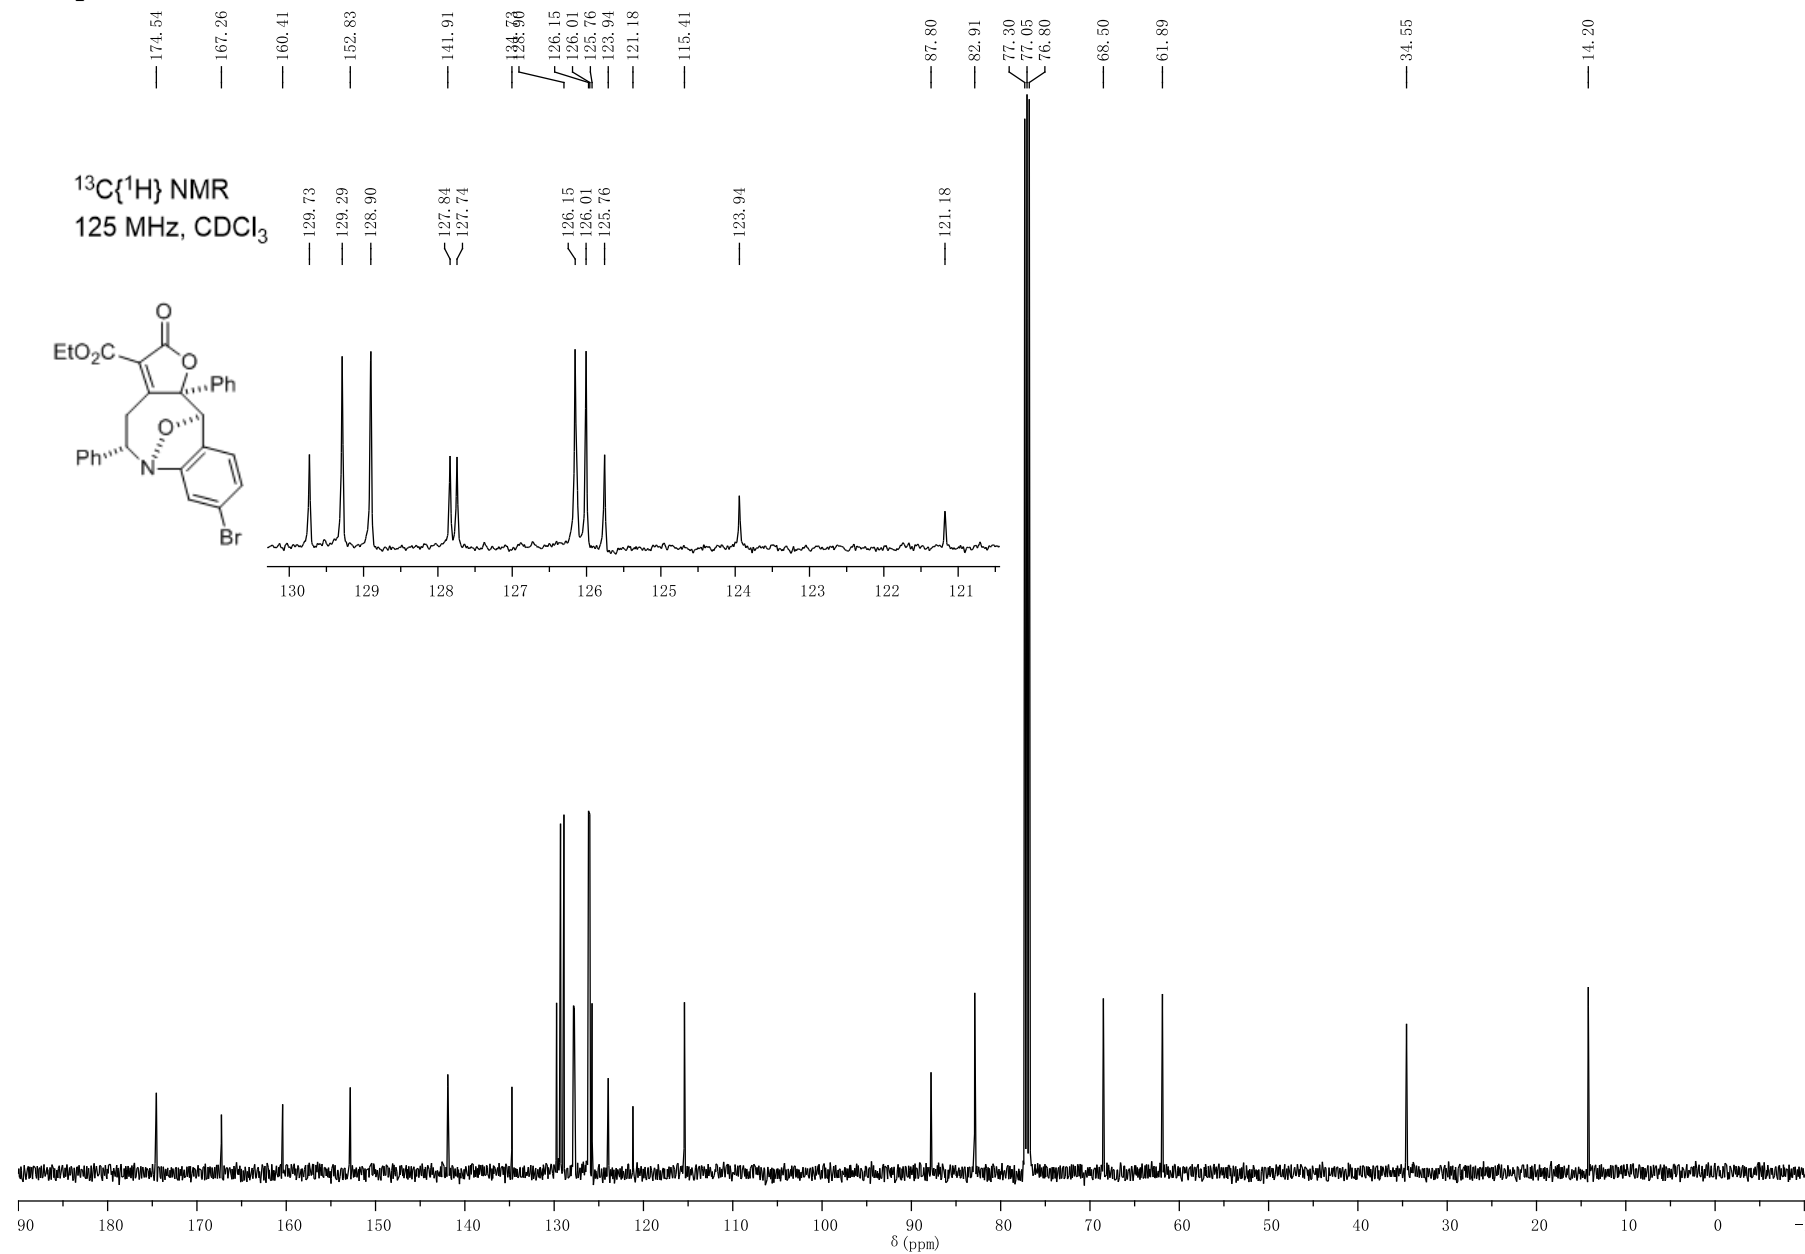



# Compound 3aj

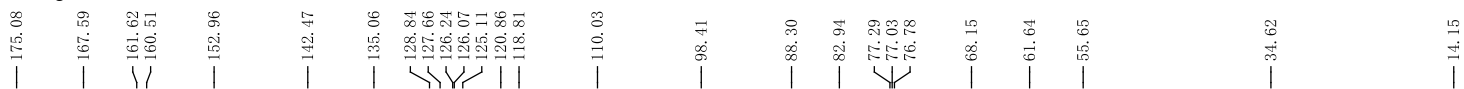

$^{13}\text{C}\{^1\text{H}\}$  NMR  
125 MHz,  $\text{CDCl}_3$

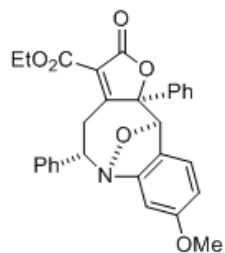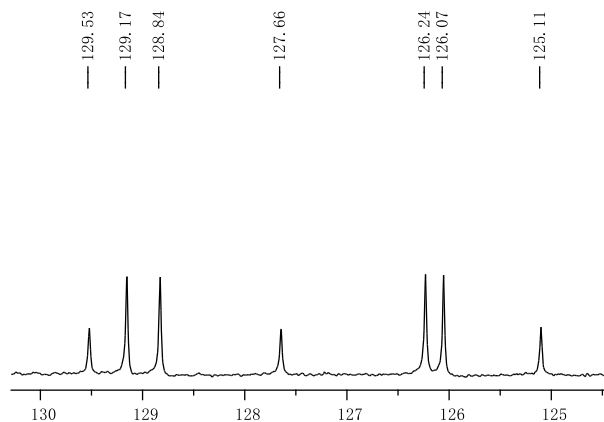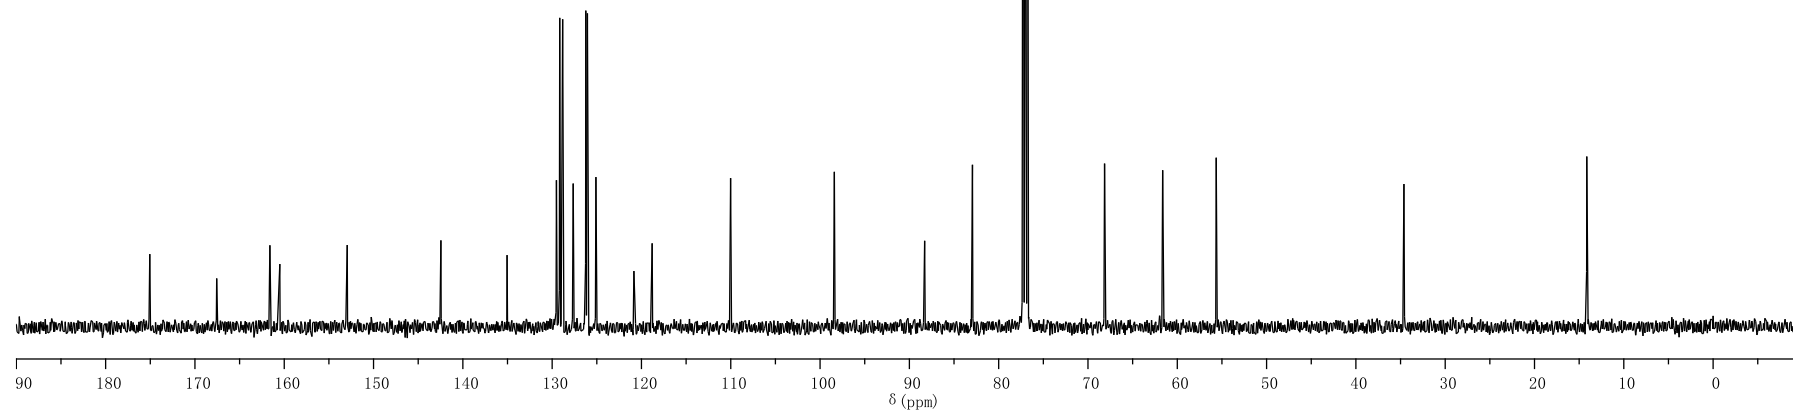

# Compound 3ak

7.644  
7.630  
7.632  
7.517  
7.483  
7.470  
7.455  
7.448  
7.435  
7.422  
7.406  
7.379  
7.364  
7.349  
7.334  
7.319  
7.260  
7.133

6.084

4.573  
4.562  
4.552  
4.541  
4.277  
4.270  
4.263  
4.256

3.599  
3.588  
3.574  
3.563

3.029  
3.008  
2.984

1.579  
1.336  
1.322  
1.308

0.001

<sup>1</sup>H NMR  
500 MHz, CDCl<sub>3</sub>

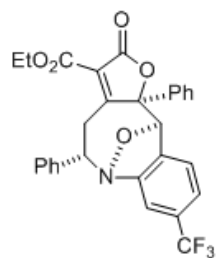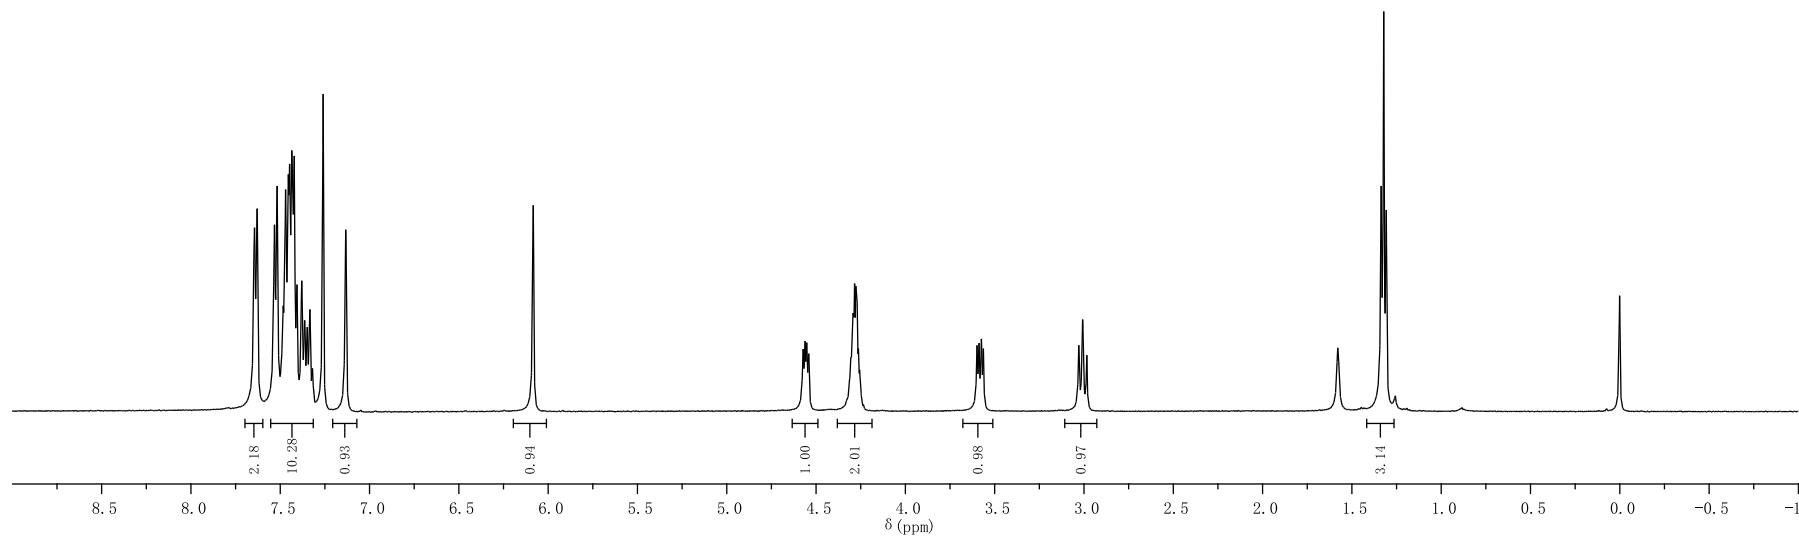

**Compound 3ak**

$^{13}\text{C}\{^1\text{H}\}$  NMR  
125 MHz,  $\text{CDCl}_3$

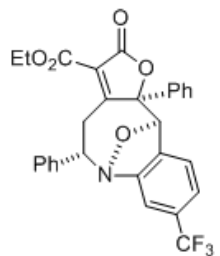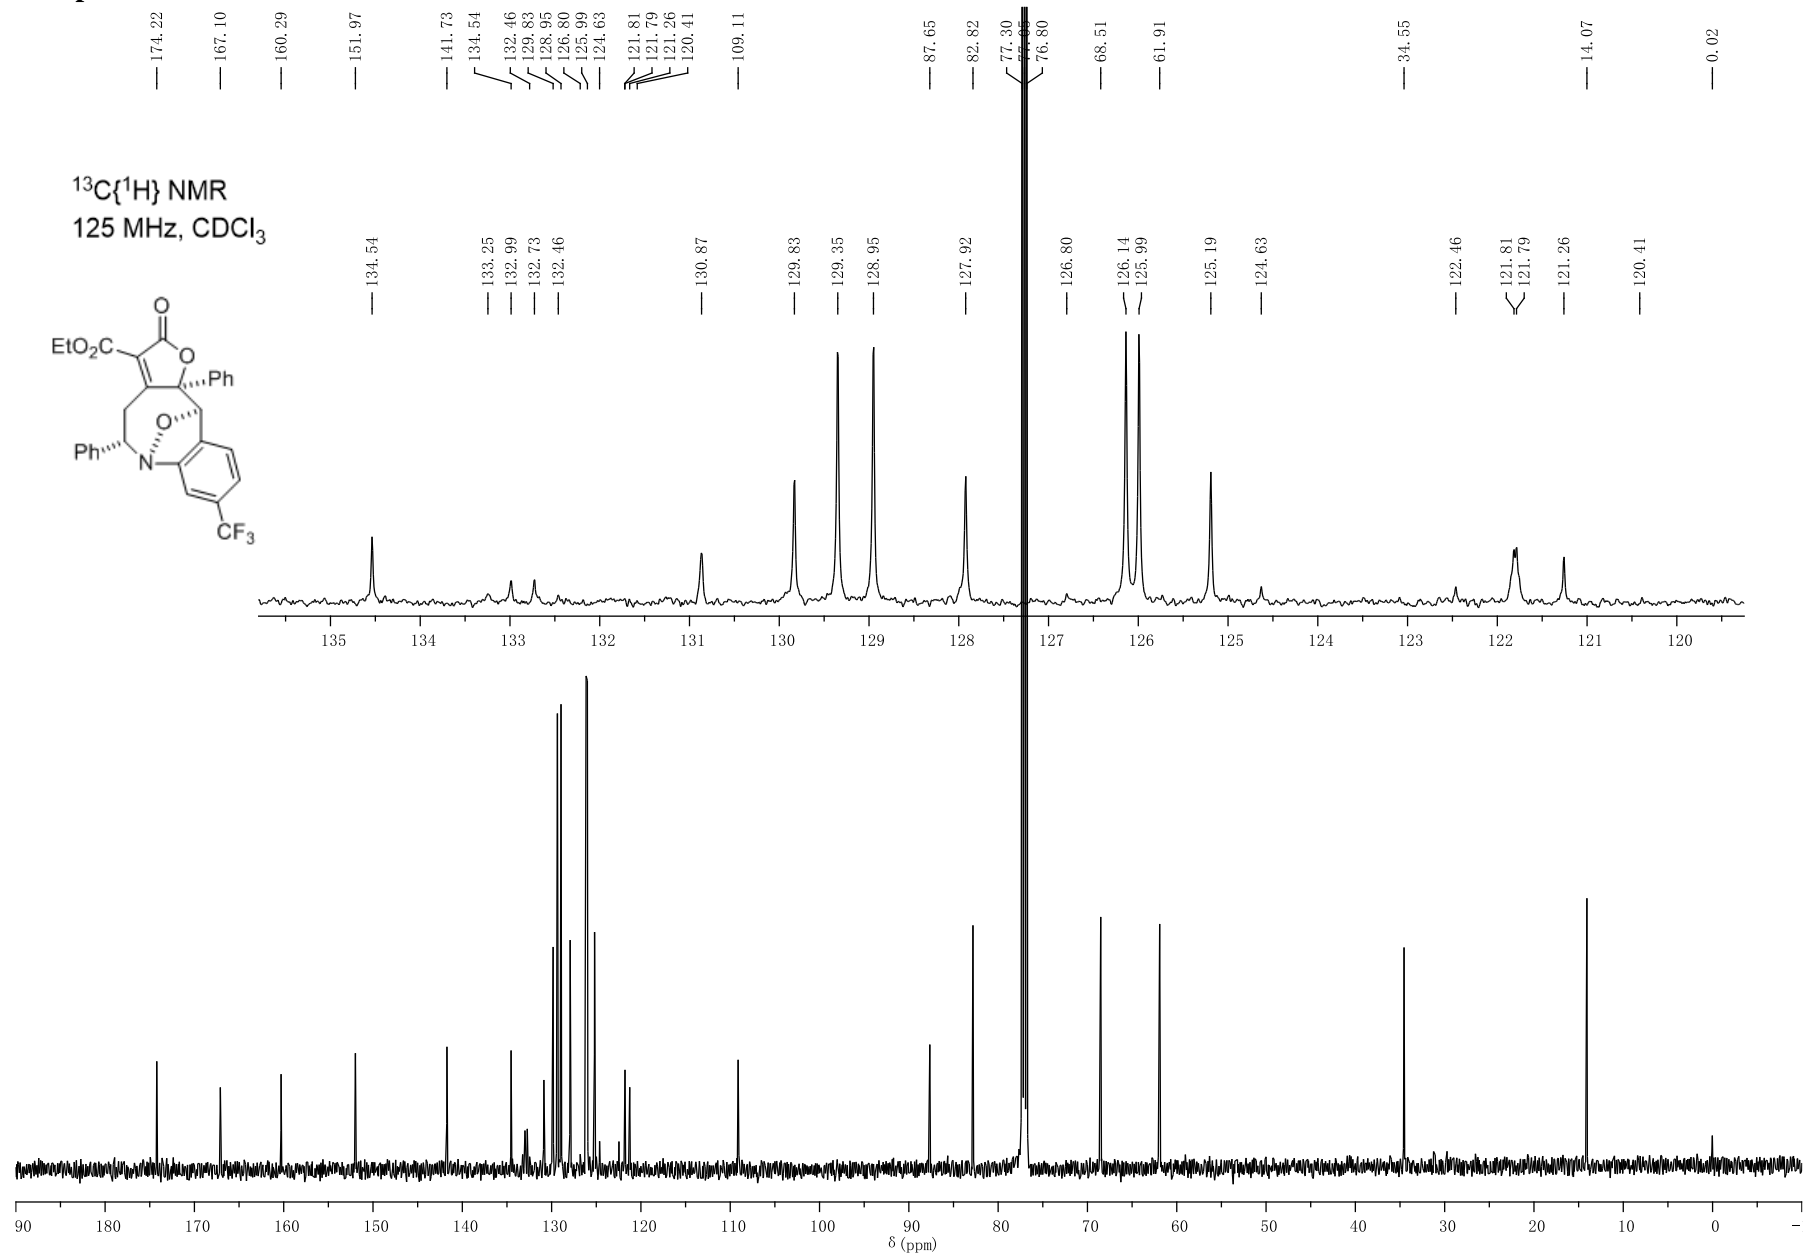

# Compound 3ak

$^{19}\text{F}$  NMR  
470 MHz,  $\text{CDCl}_3$

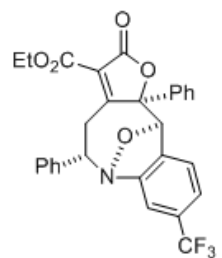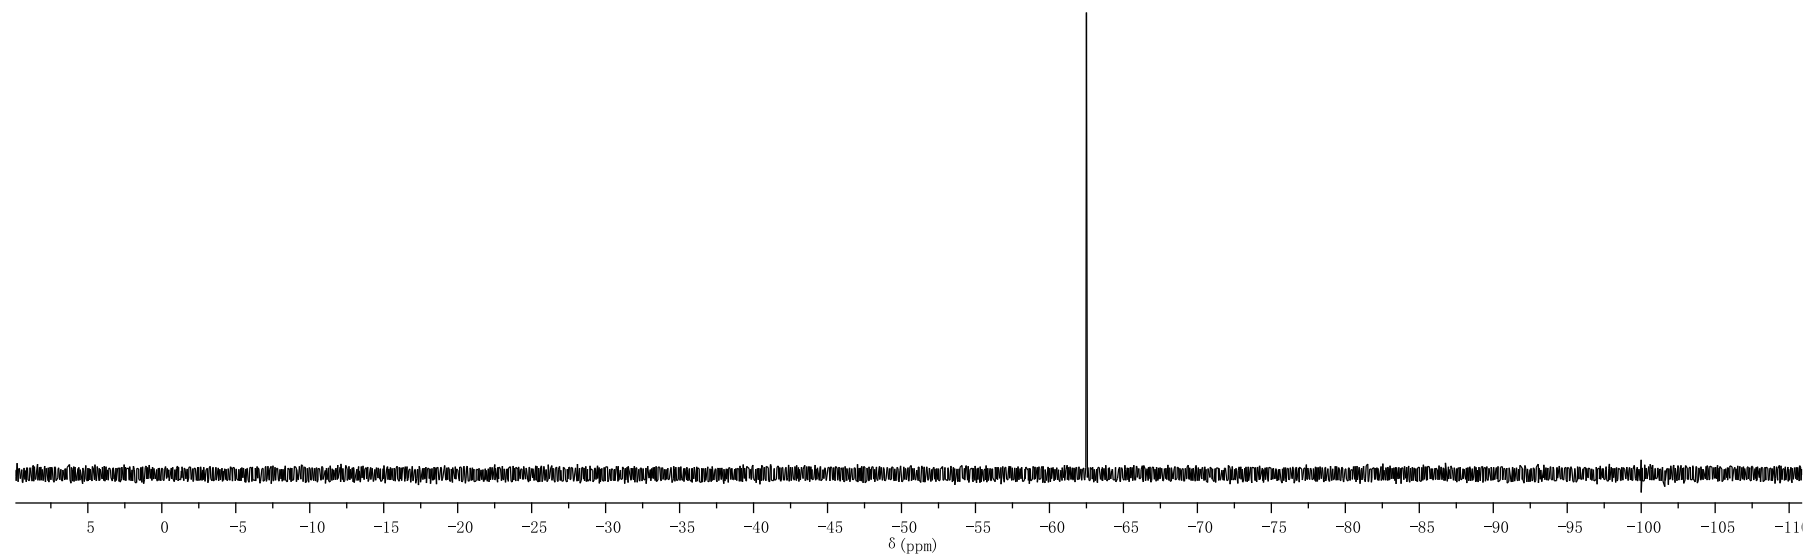

# Compound 3al

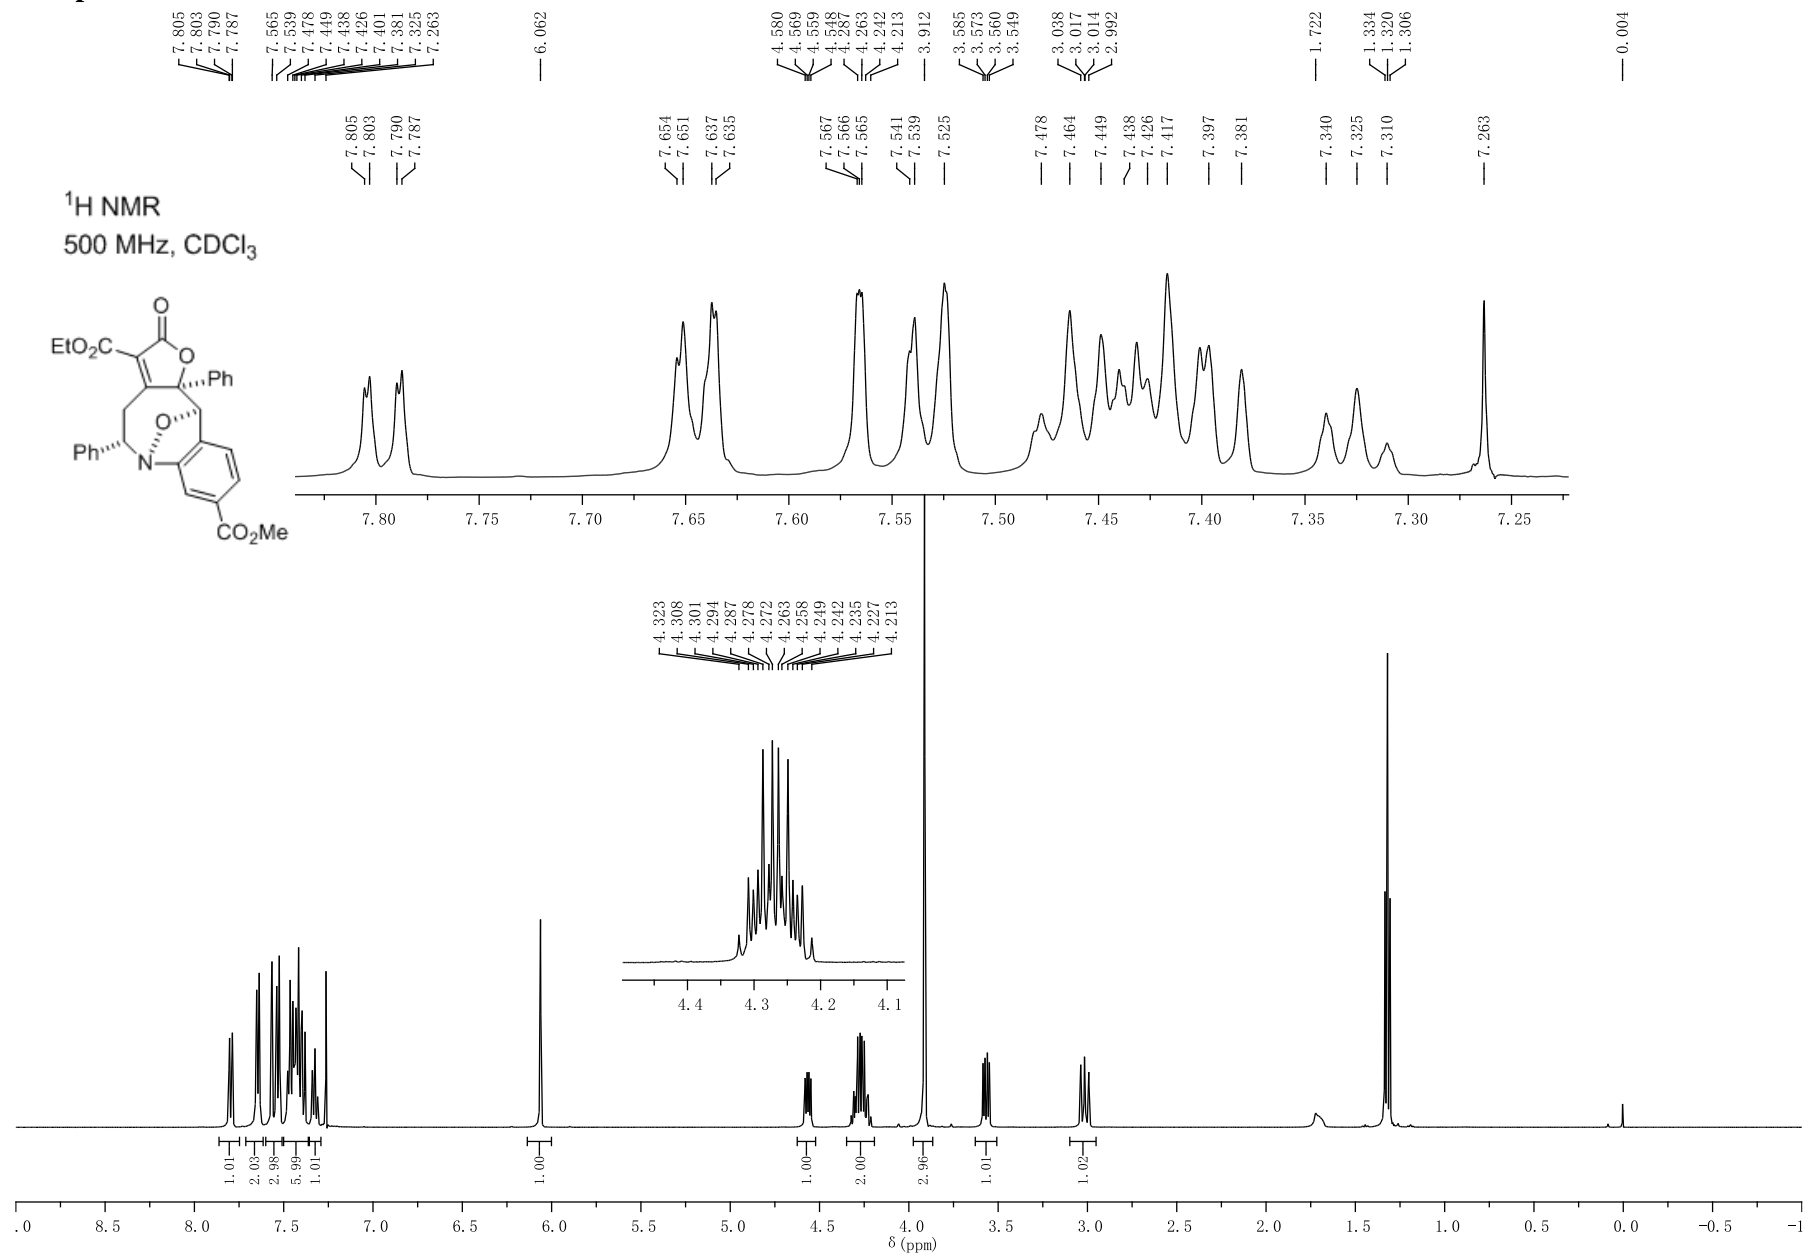



# Compound 3al

$^{13}\text{C}\{^1\text{H}\}$  NMR  
125 MHz,  $\text{CDCl}_3$

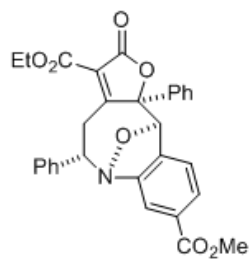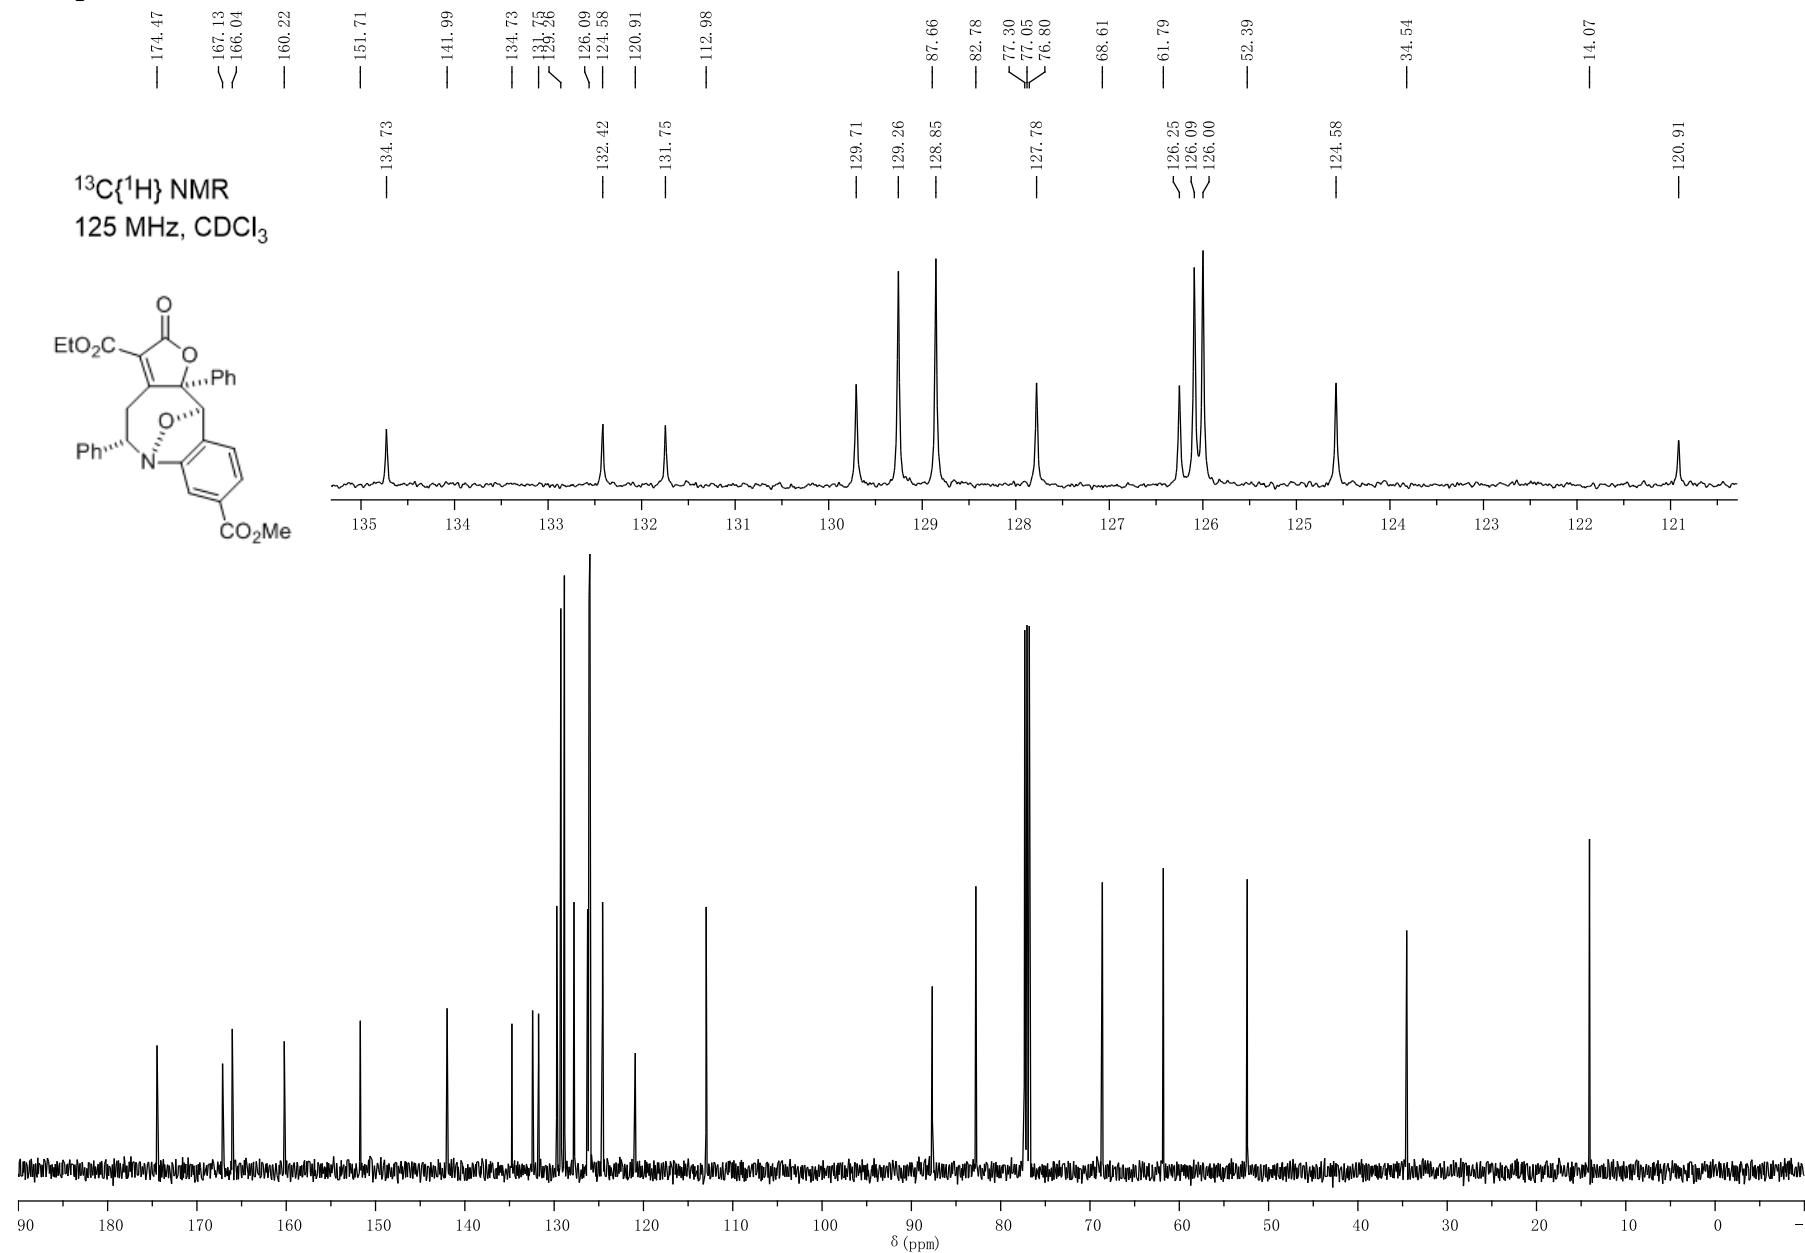

**Compound 3an**

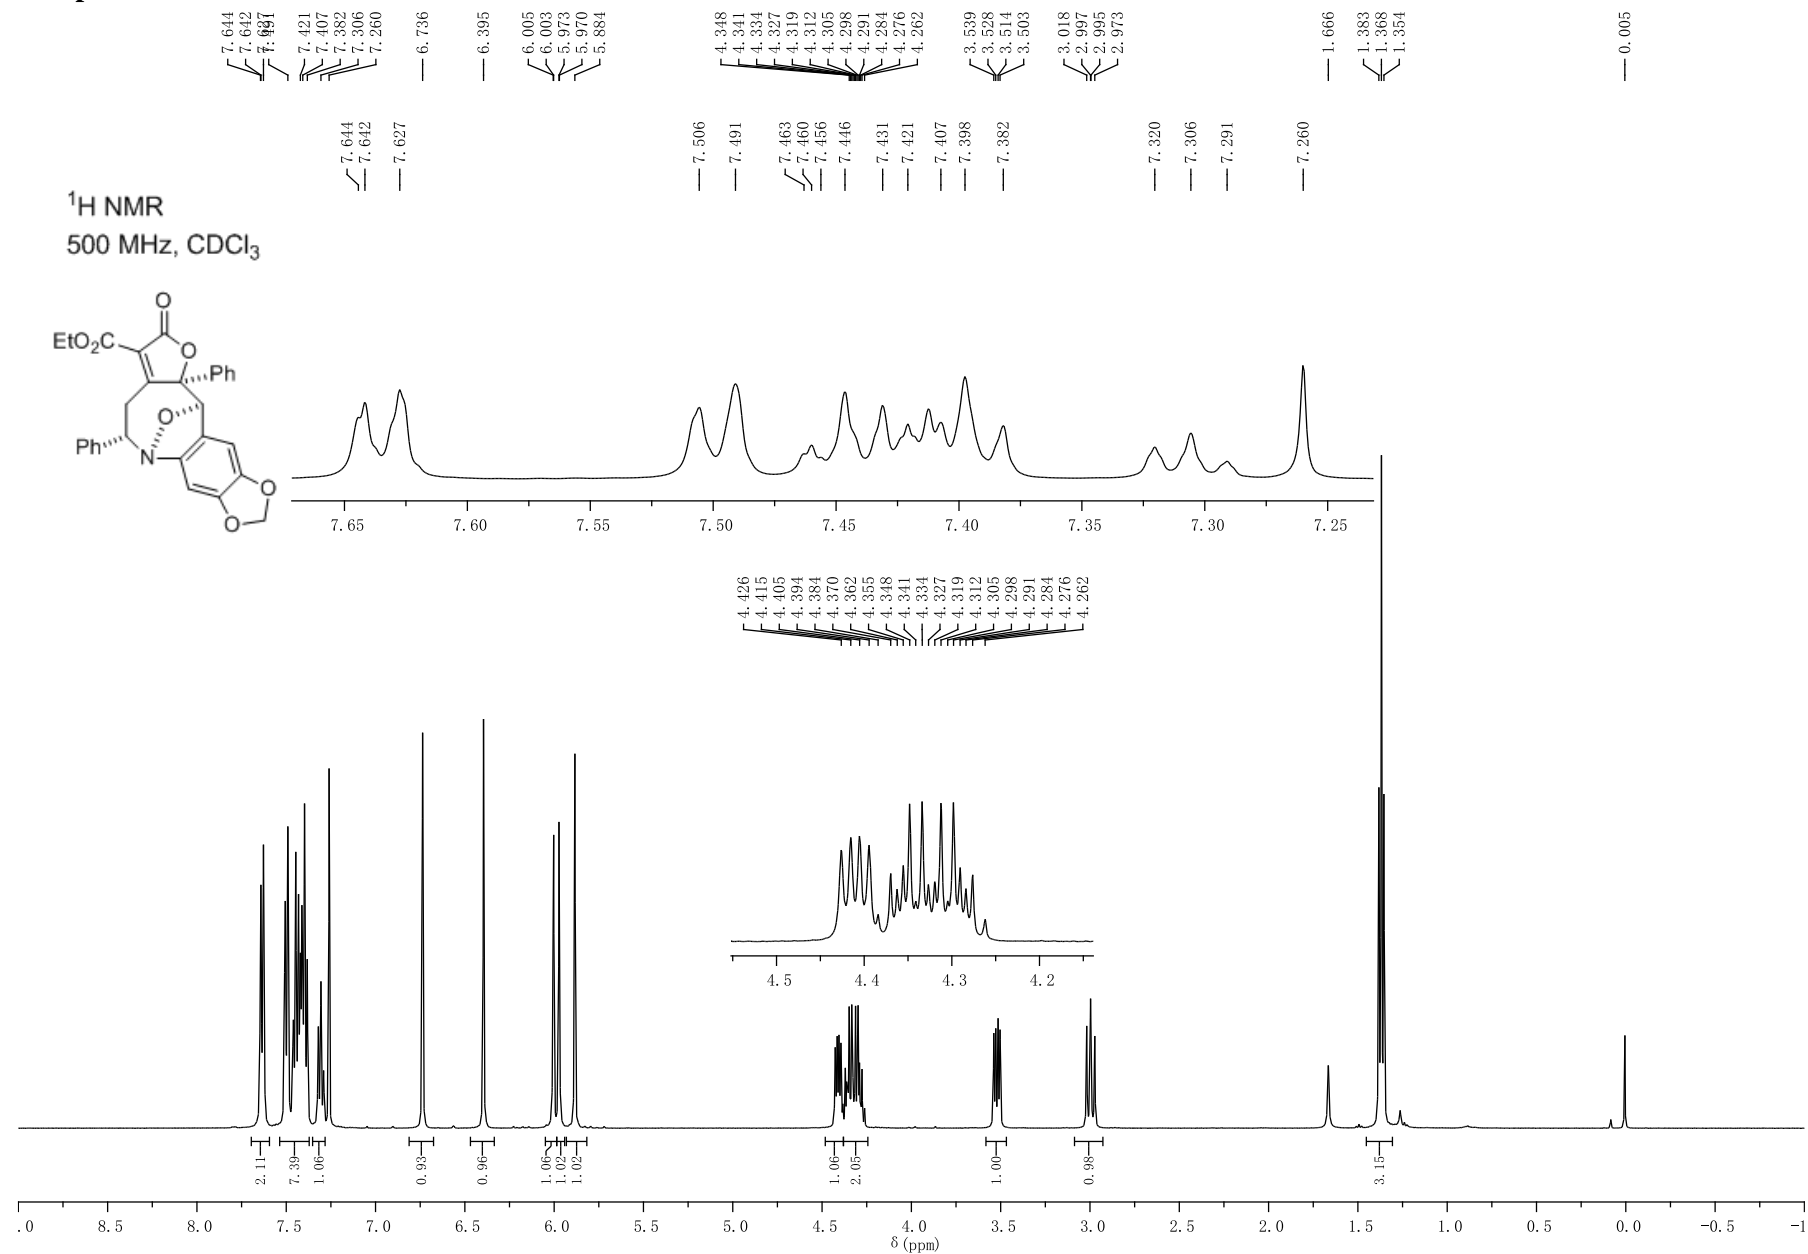

**Compound 3an**

$^{13}\text{C}\{^1\text{H}\}$  NMR  
125 MHz,  $\text{CDCl}_3$

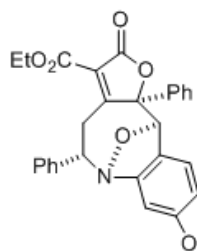

$\delta$  175.30, 167.66, 160.56, 149.59, 145.00, 142.50, 149.59, 135.05, 129.17, 128.83, 127.65, 126.15, 126.04, 145.82, 120.59, 118.32, 142.50, 104.67, 102.10, 94.47, 88.42, 83.19, 77.30, 77.05, 76.80, 67.96, 61.73, 135.05, 34.62, 129.56, 129.17, 128.83, 127.65, 127.65, 126.15, 126.01, 14.17

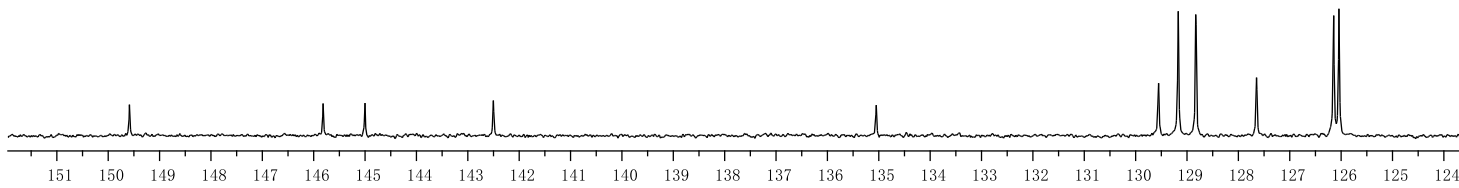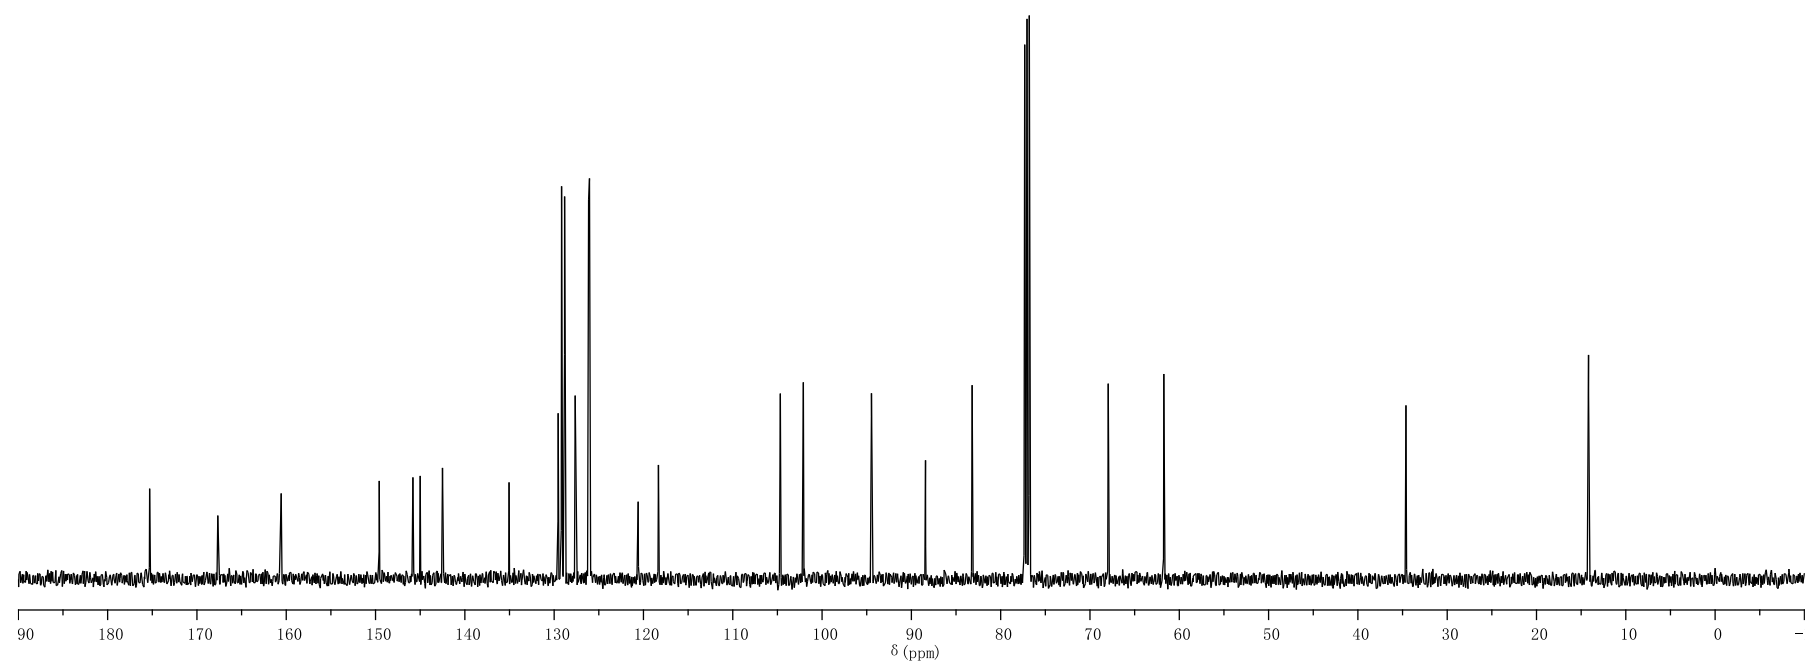

### 6.3 Copies of NMR spectra for transformation products

#### Compound 4

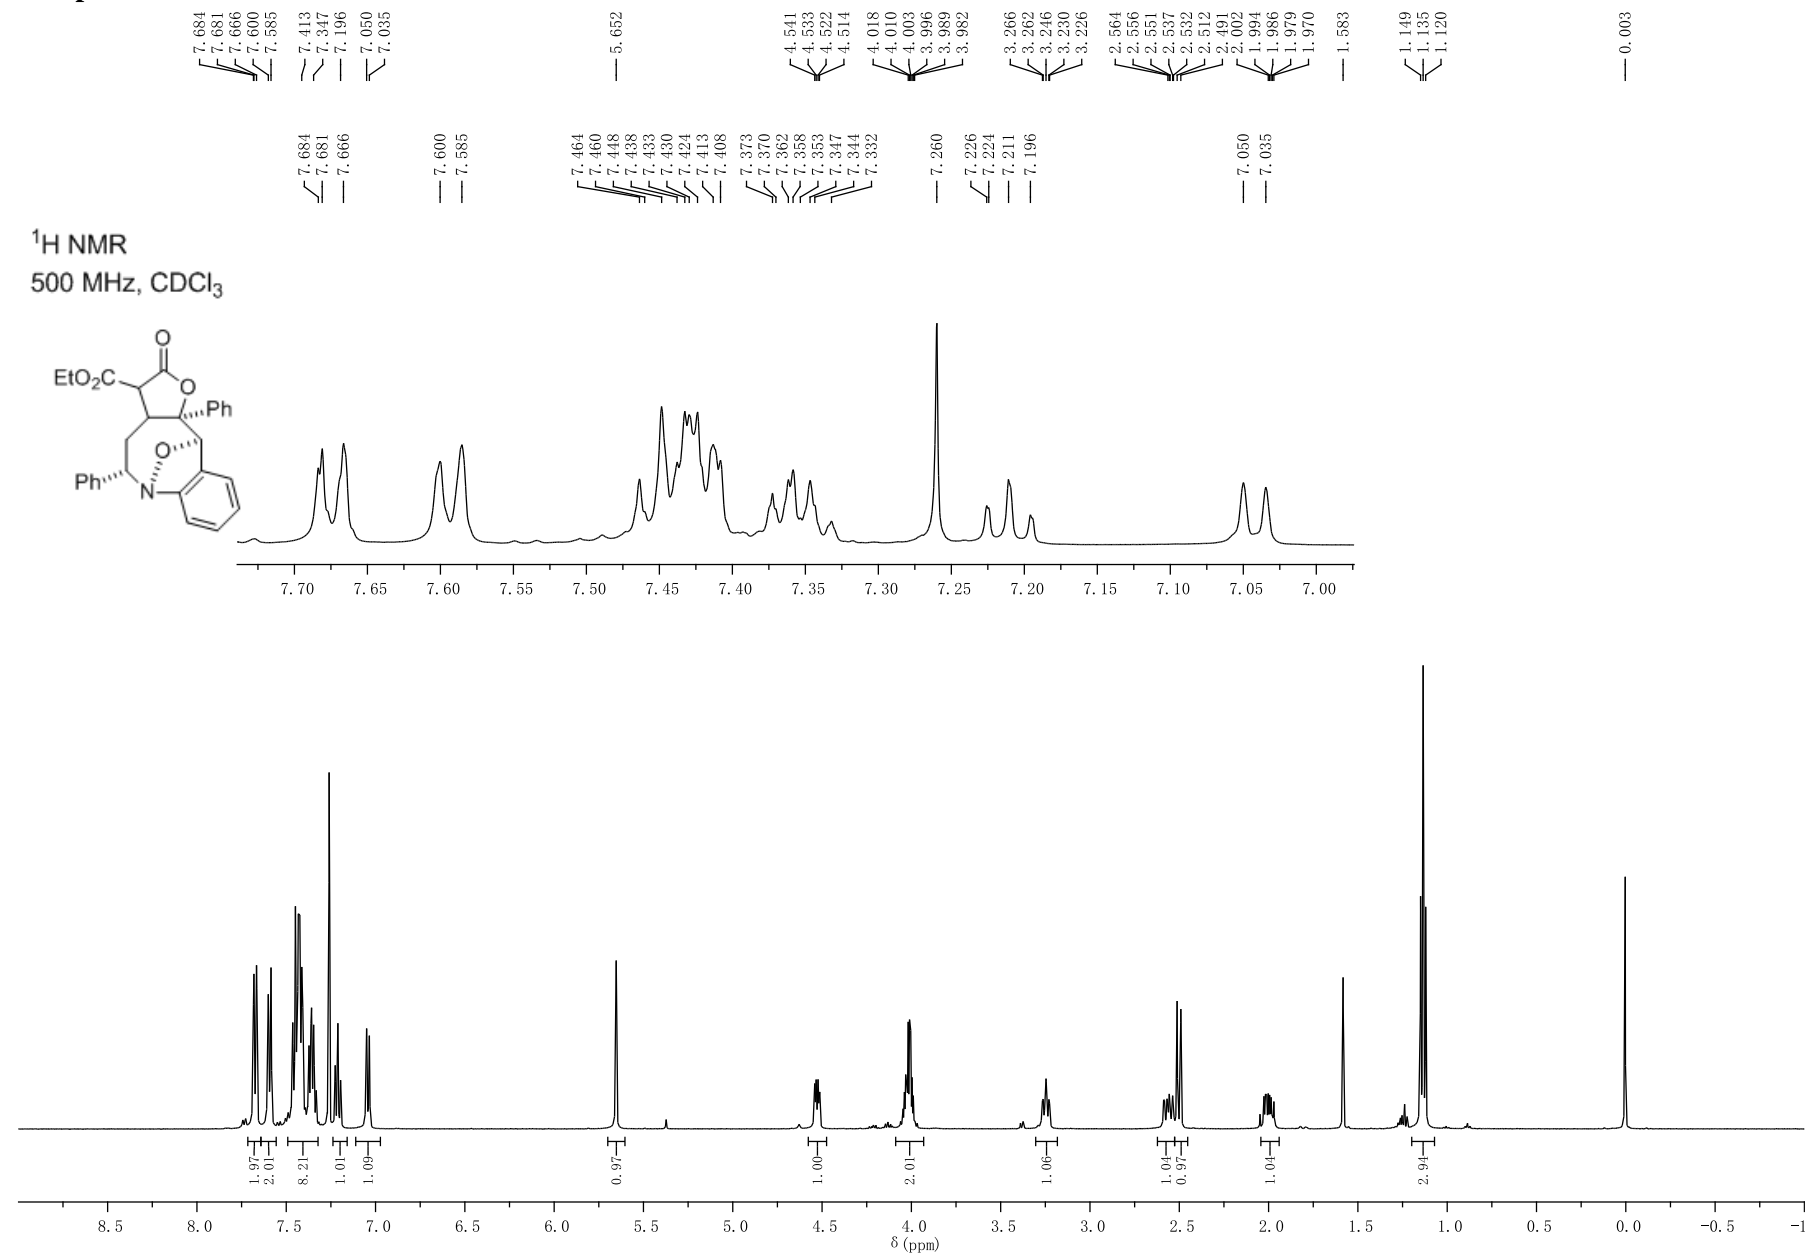

# Compound 4

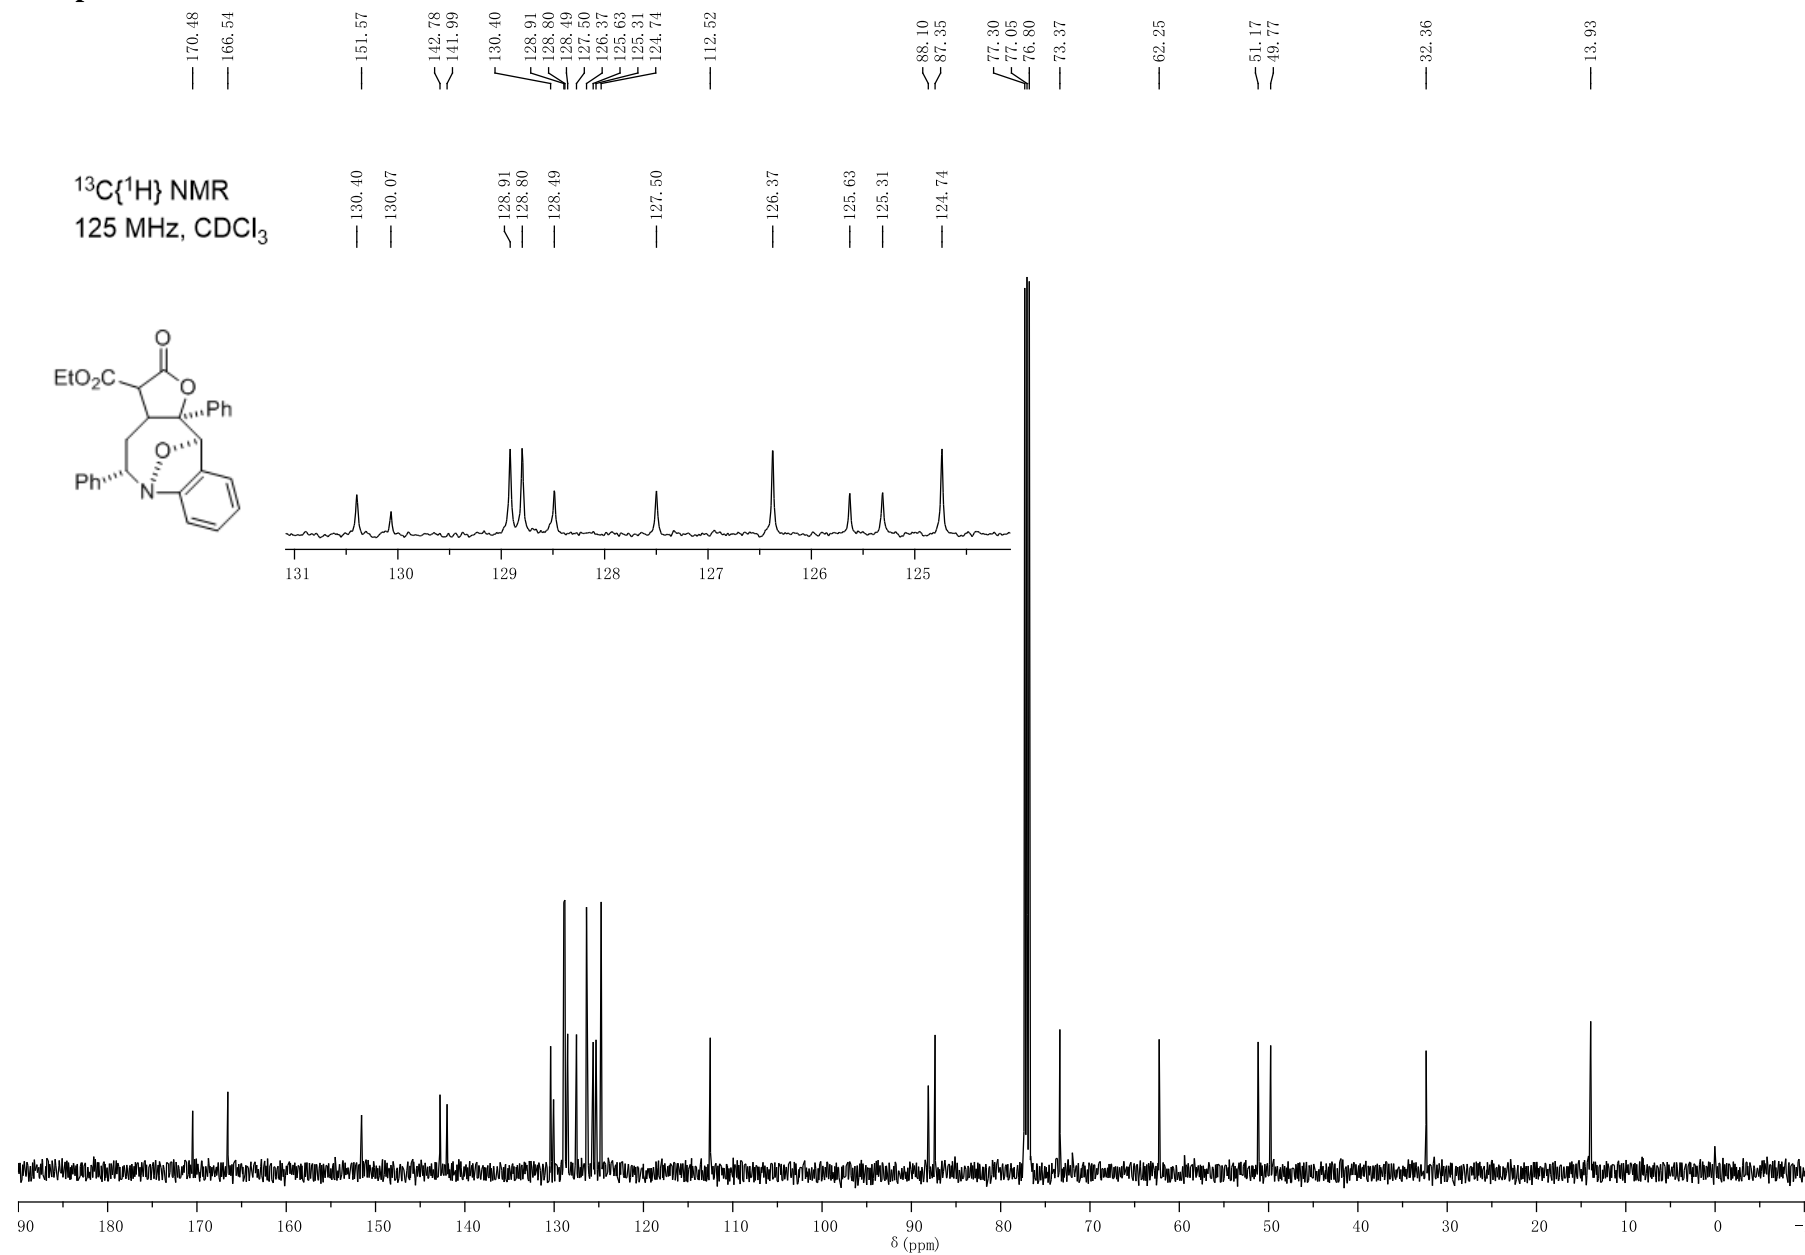

**Compound 5**

7.826  
7.823  
7.809  
7.460  
7.384  
7.314  
7.284  
7.191  
7.161  
6.902  
6.889  
6.887  
6.874  
6.567  
6.552

5.657

4.584  
4.572  
4.560  
4.338  
4.225  
4.210  
4.196  
4.174  
3.703  
3.691  
3.680  
3.669  
3.568  
3.545

2.192  
2.179  
2.164  
2.152  
2.114  
2.102  
2.090  
2.078  
2.063  
2.051

1.294  
1.280  
1.266

0.000

<sup>1</sup>H NMR  
500 MHz, CDCl<sub>3</sub>

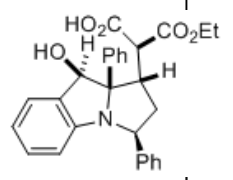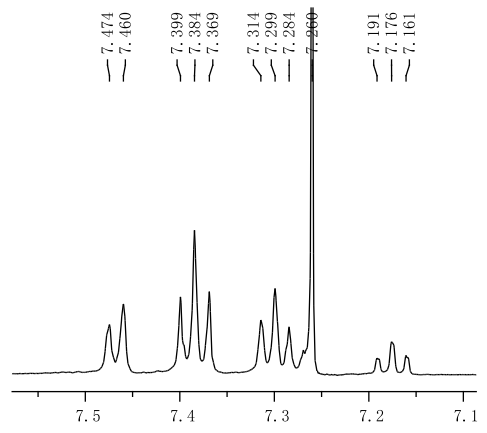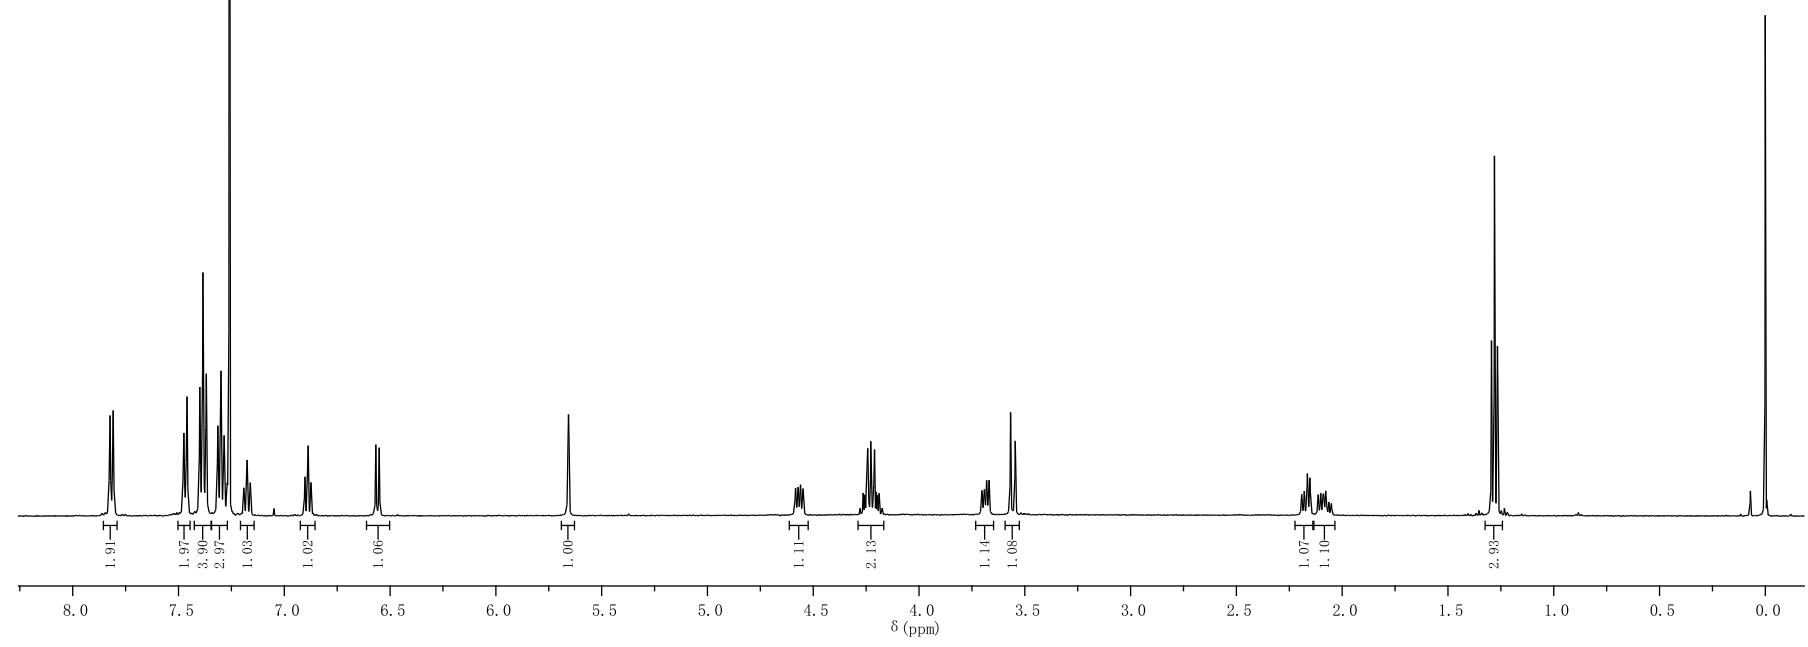

# Compound 5

$^{13}\text{C}\{^1\text{H}\}$  NMR  
125 MHz,  $\text{CDCl}_3$

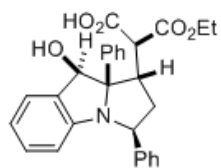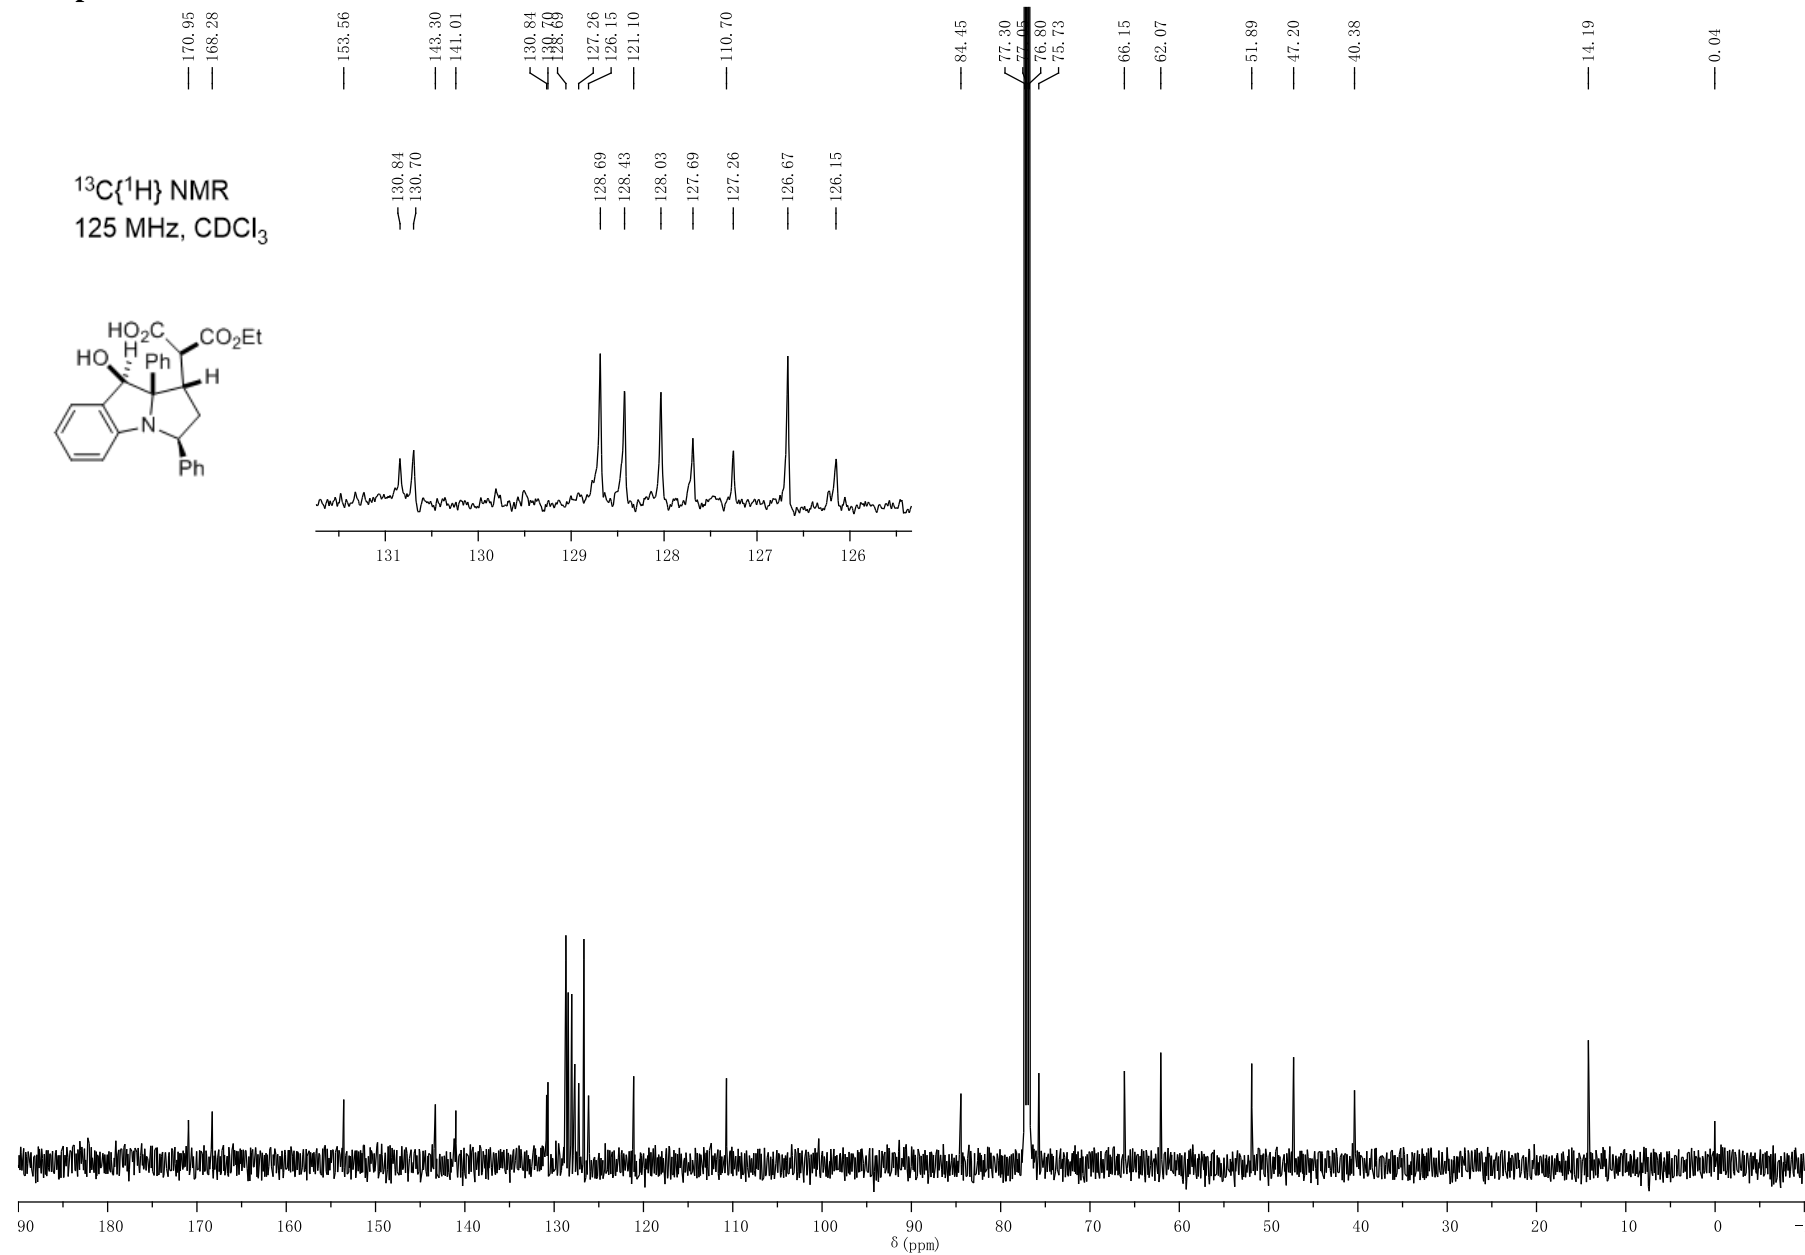

**Compound 6**

7.649  
7.633  
7.462  
7.324  
7.294  
6.976  
6.961  
6.779  
6.762

5.750

4.692  
4.678  
4.670  
4.656  
4.337  
4.323  
4.309  
4.296  
4.282  
4.267

3.440  
3.430  
3.414  
3.404

3.031  
3.005

2.430  
2.416  
2.402  
2.388

2.256  
2.251  
2.246  
2.235  
2.224

1.341  
1.327  
1.313

0.006

<sup>1</sup>H NMR  
500 MHz, CDCl<sub>3</sub>

7.477  
7.462  
7.410  
7.394  
7.382  
7.367  
7.352  
7.339  
7.324  
7.317  
7.308  
7.302  
7.294  
7.290  
7.286  
7.279  
7.260  
6.991  
6.976  
6.961

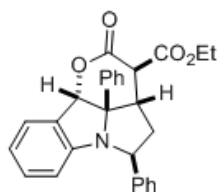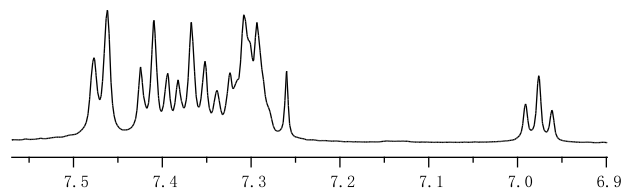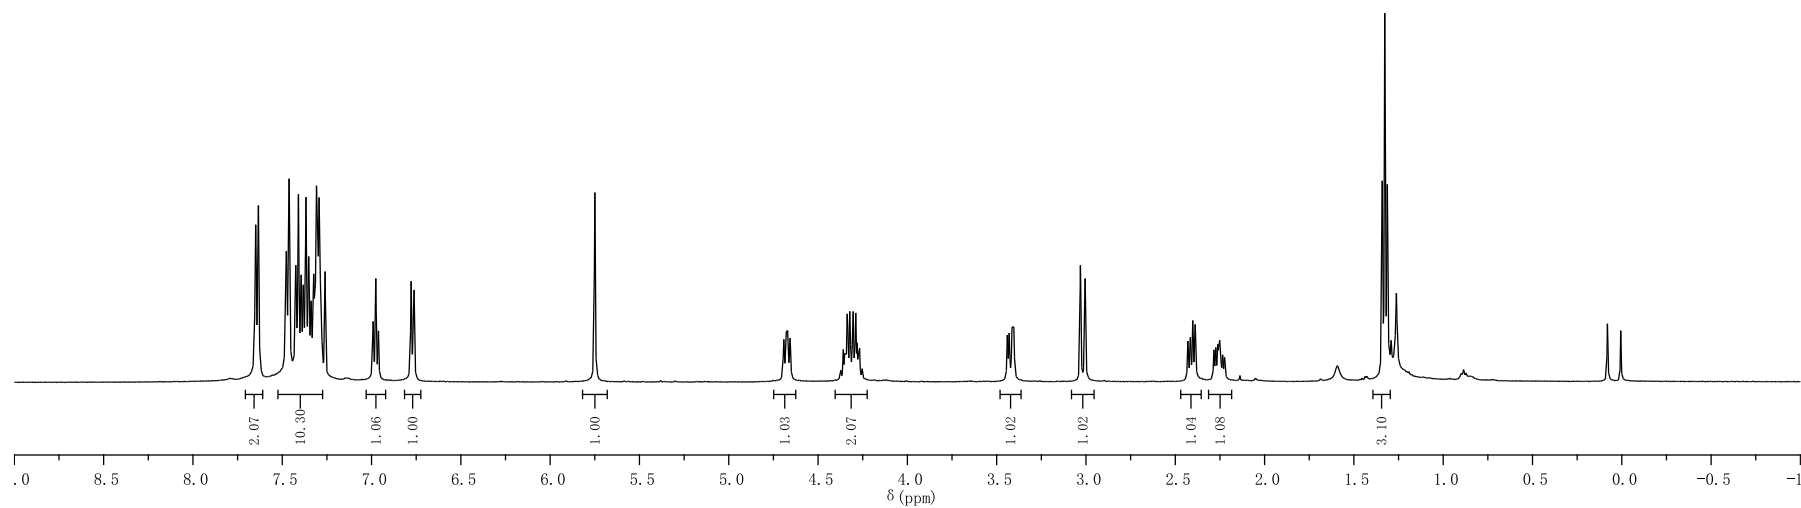



# Compound 6

168.36  
167.46

154.62

144.83  
142.52

131.73

127.37  
125.13  
121.91

111.13

87.47

78.93  
77.30  
77.04  
76.79

68.17

62.14

48.93  
46.58

39.14

14.15

$^{13}\text{C}\{^1\text{H}\}$  NMR  
125 MHz,  $\text{CDCl}_3$

131.73

128.95  
128.79

127.88

127.37

126.47

125.78  
125.64

125.13

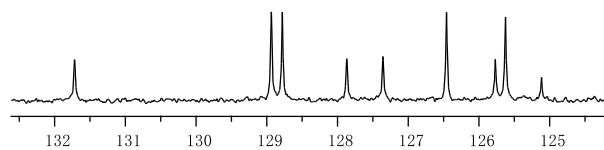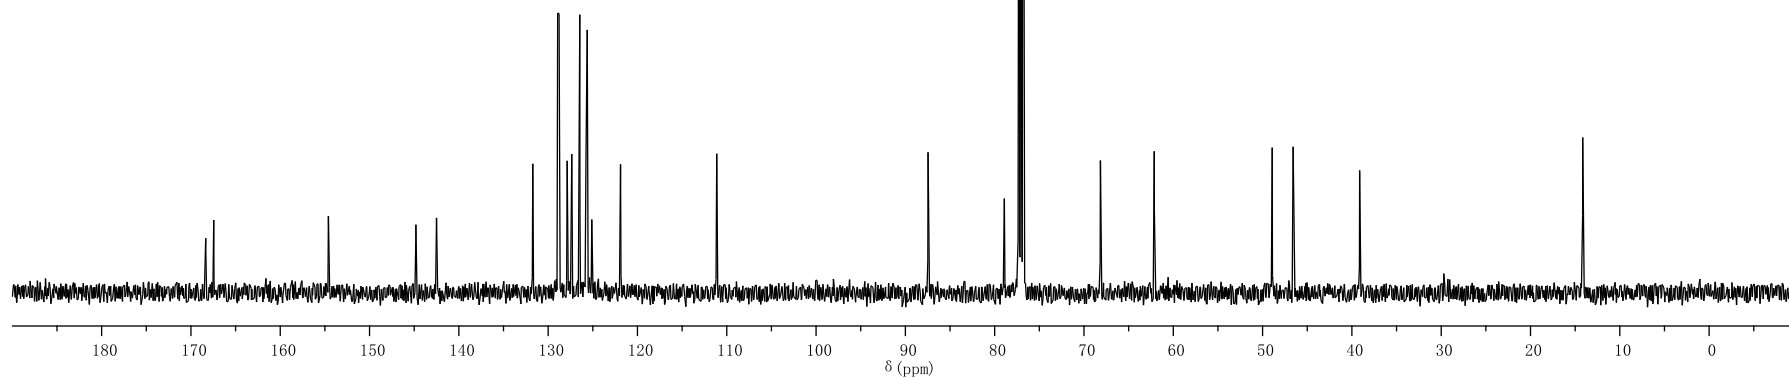

# Compound 7

7.759  
7.734  
7.456  
7.366  
7.316  
7.241  
7.059  
7.044

5.436

4.570

2.945  
2.925  
2.905

2.479  
2.463  
2.444  
2.428  
2.090  
2.059  
2.035

1.850  
1.798  
1.577

0.002

7.541  
7.526  
7.496  
7.481  
7.471  
7.465  
7.460  
7.345  
7.316  
7.302  
7.260  
7.241

<sup>1</sup>H NMR  
500 MHz, CDCl<sub>3</sub>

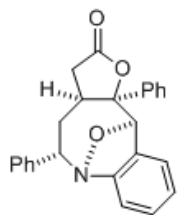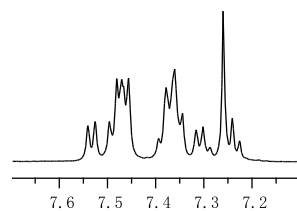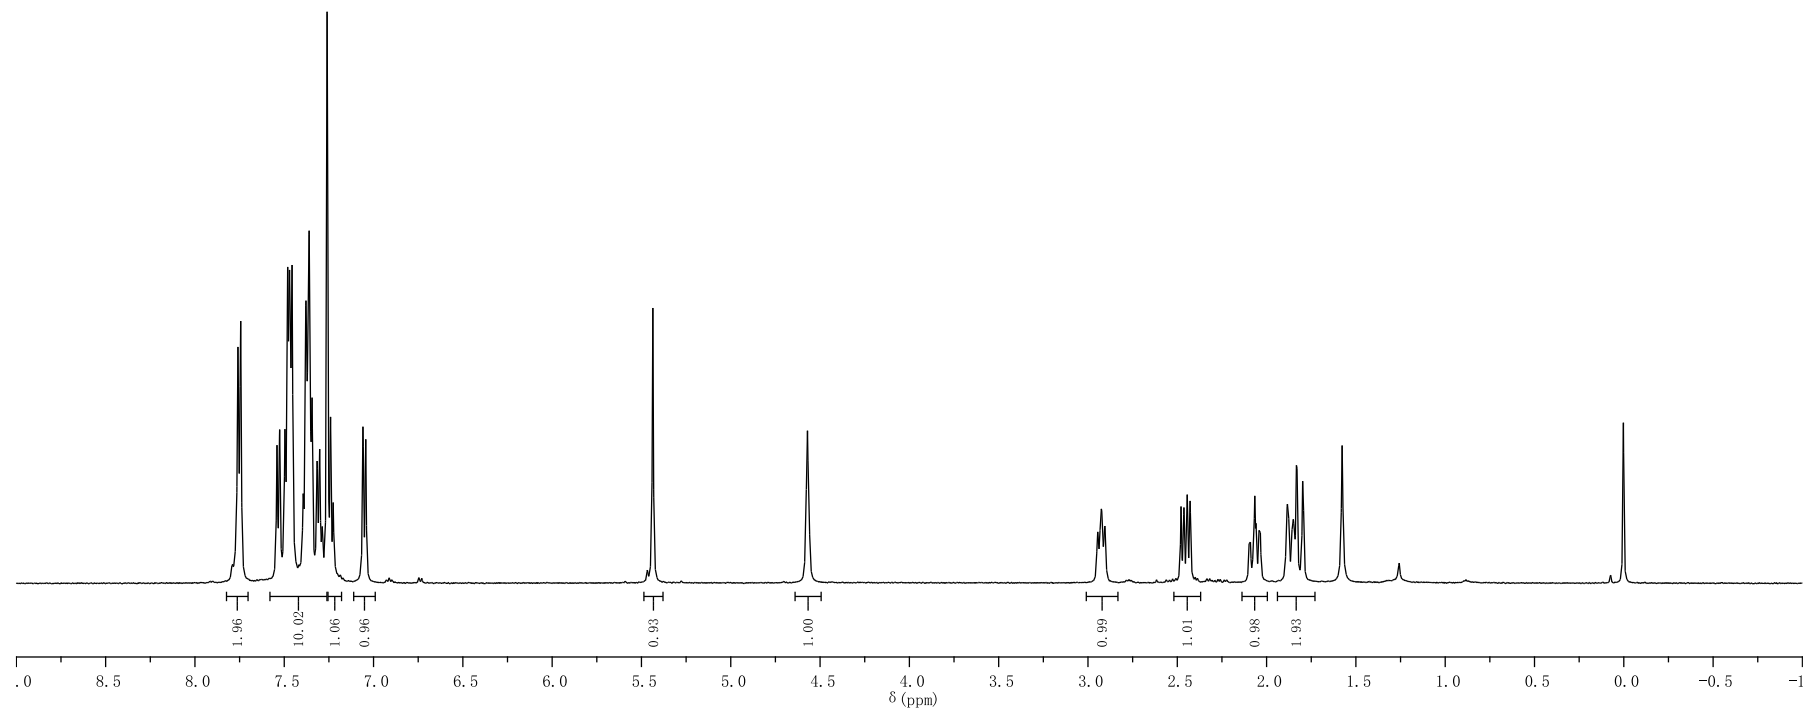

# Compound 7

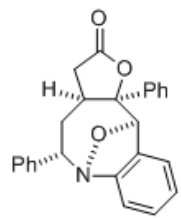

$^{13}\text{C}\{^1\text{H}\}$  NMR  
125 MHz,  $\text{CDCl}_3$

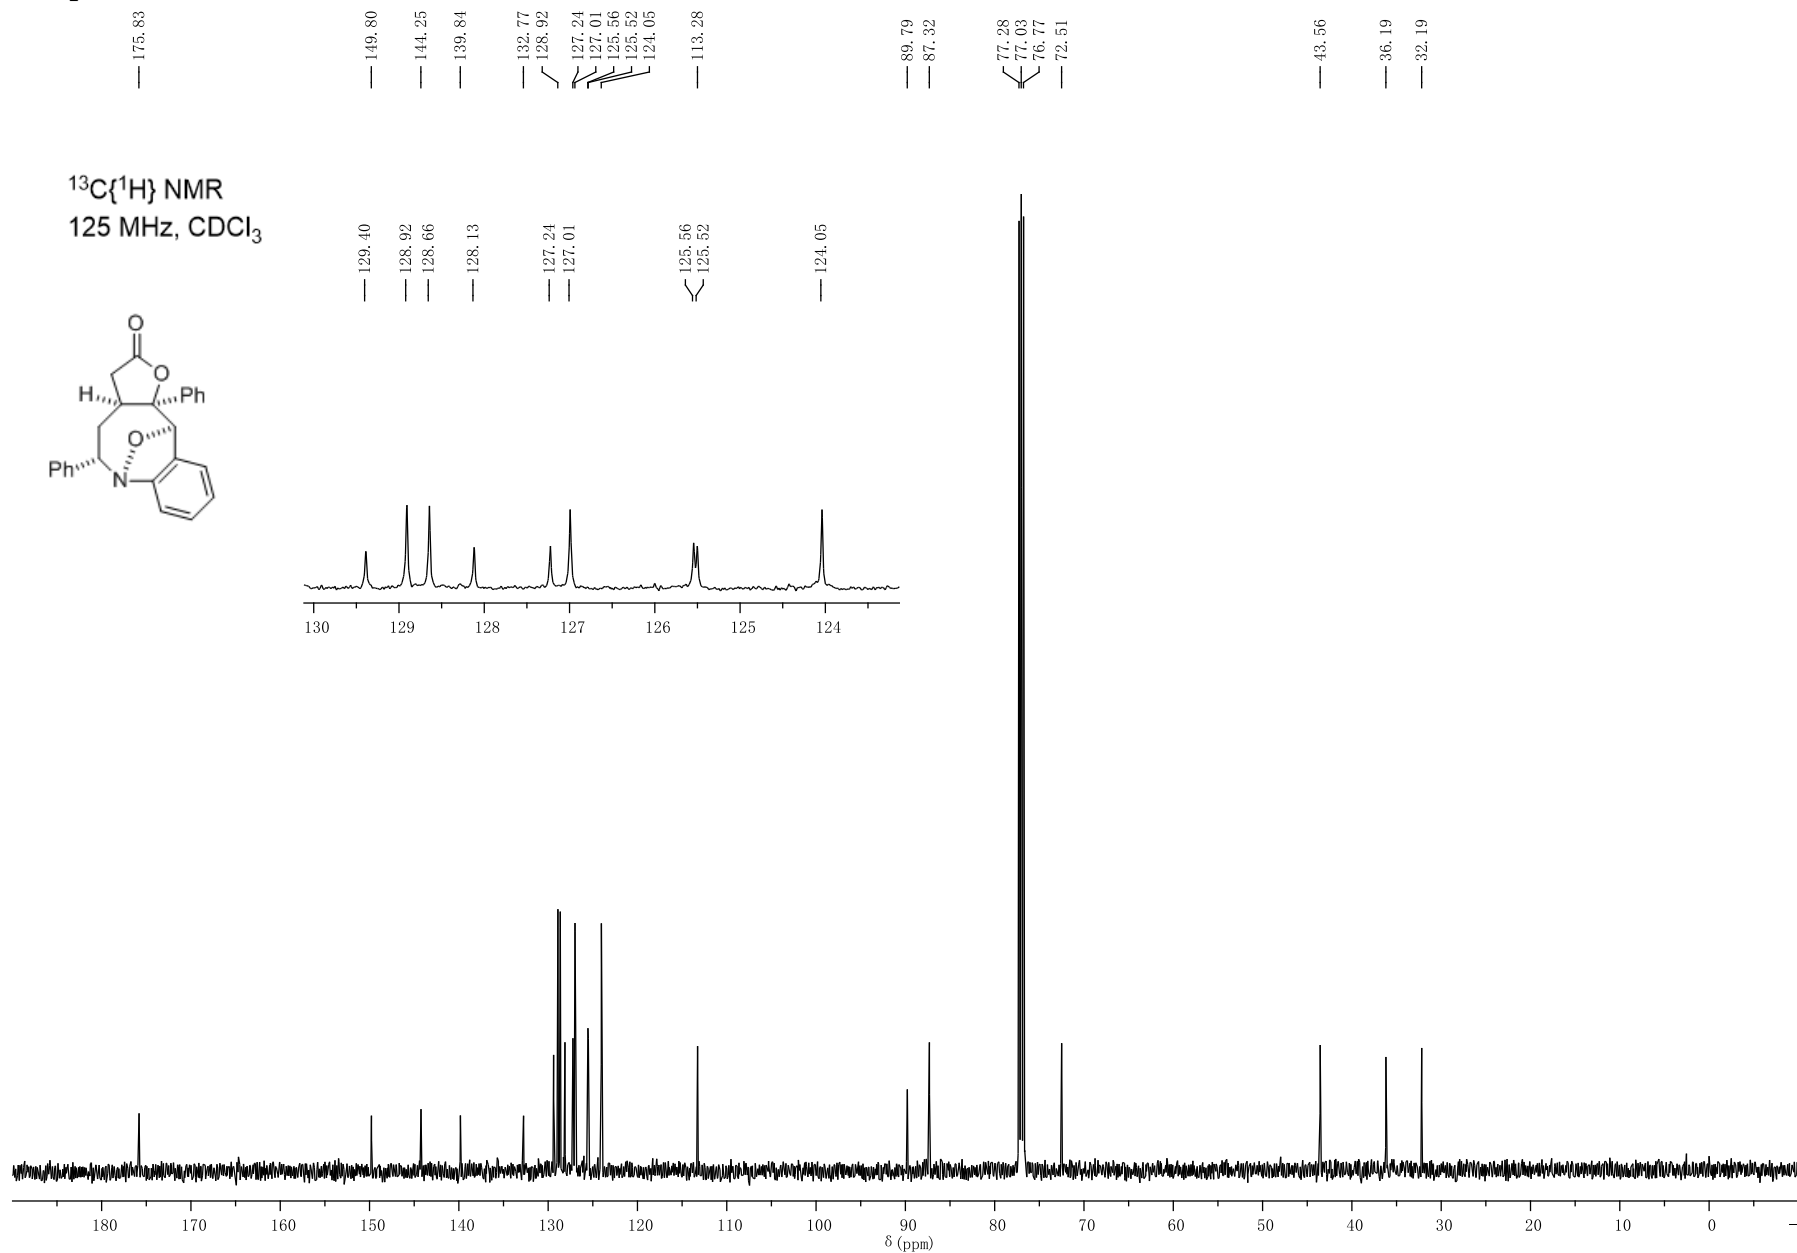

# Compound 8

7.636  
7.629  
7.459  
7.305  
7.268  
7.228  
7.193  
6.888  
6.873  
6.675  
6.659

5.548

4.540  
4.526  
4.519  
4.505

3.307  
3.295  
3.287  
3.278  
3.267  
2.677  
2.666  
2.645  
2.633  
2.397  
2.183  
2.165  
2.151  
2.133  
2.088  
2.077  
2.066  
2.063  
2.055  
2.041  
2.029

0.005

<sup>1</sup>H NMR  
500 MHz, CDCl<sub>3</sub>

7.474  
7.459  
7.386  
7.371  
7.356  
7.348  
7.335  
7.320  
7.305  
7.299  
7.283  
7.268  
7.260  
7.243  
7.228  
7.224  
7.208  
7.193

6.903  
6.888  
6.873

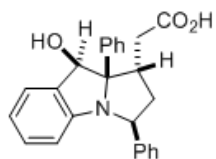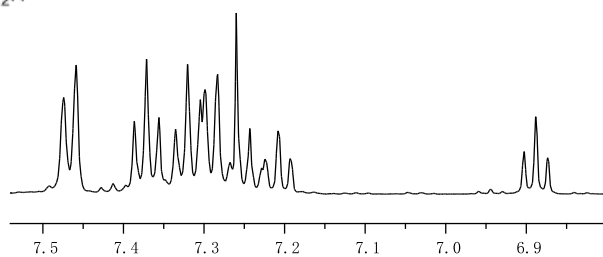

2.677  
2.666  
2.645  
2.633

2.437  
2.423  
2.411  
2.397

2.183  
2.165  
2.151  
2.133  
2.088  
2.077  
2.066  
2.063  
2.055  
2.041  
2.029

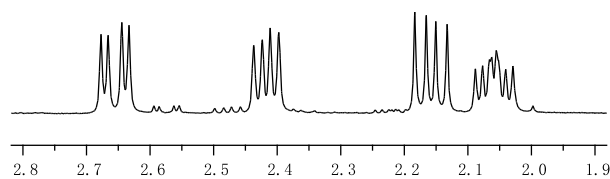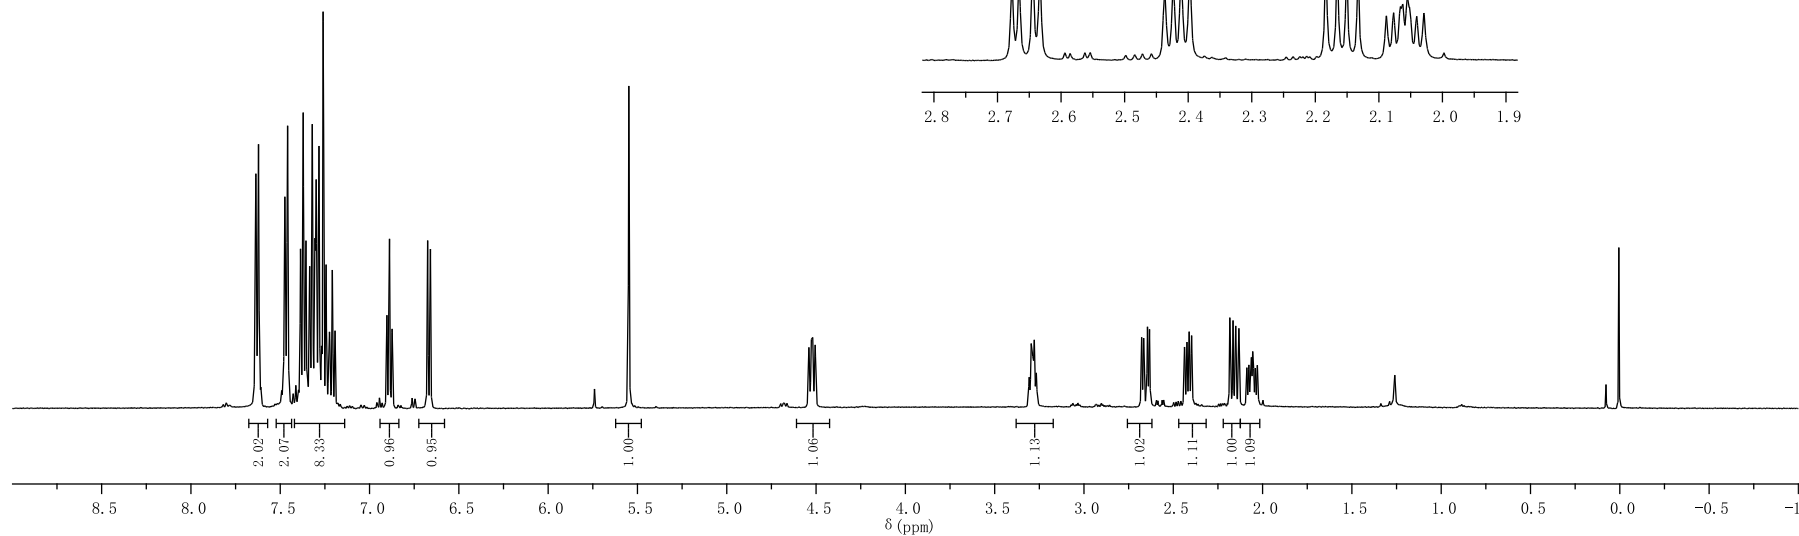

# Compound 8

$^{13}\text{C}\{^1\text{H}\}$  NMR  
125 MHz,  $\text{CDCl}_3$

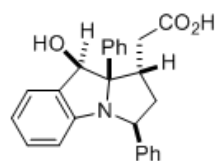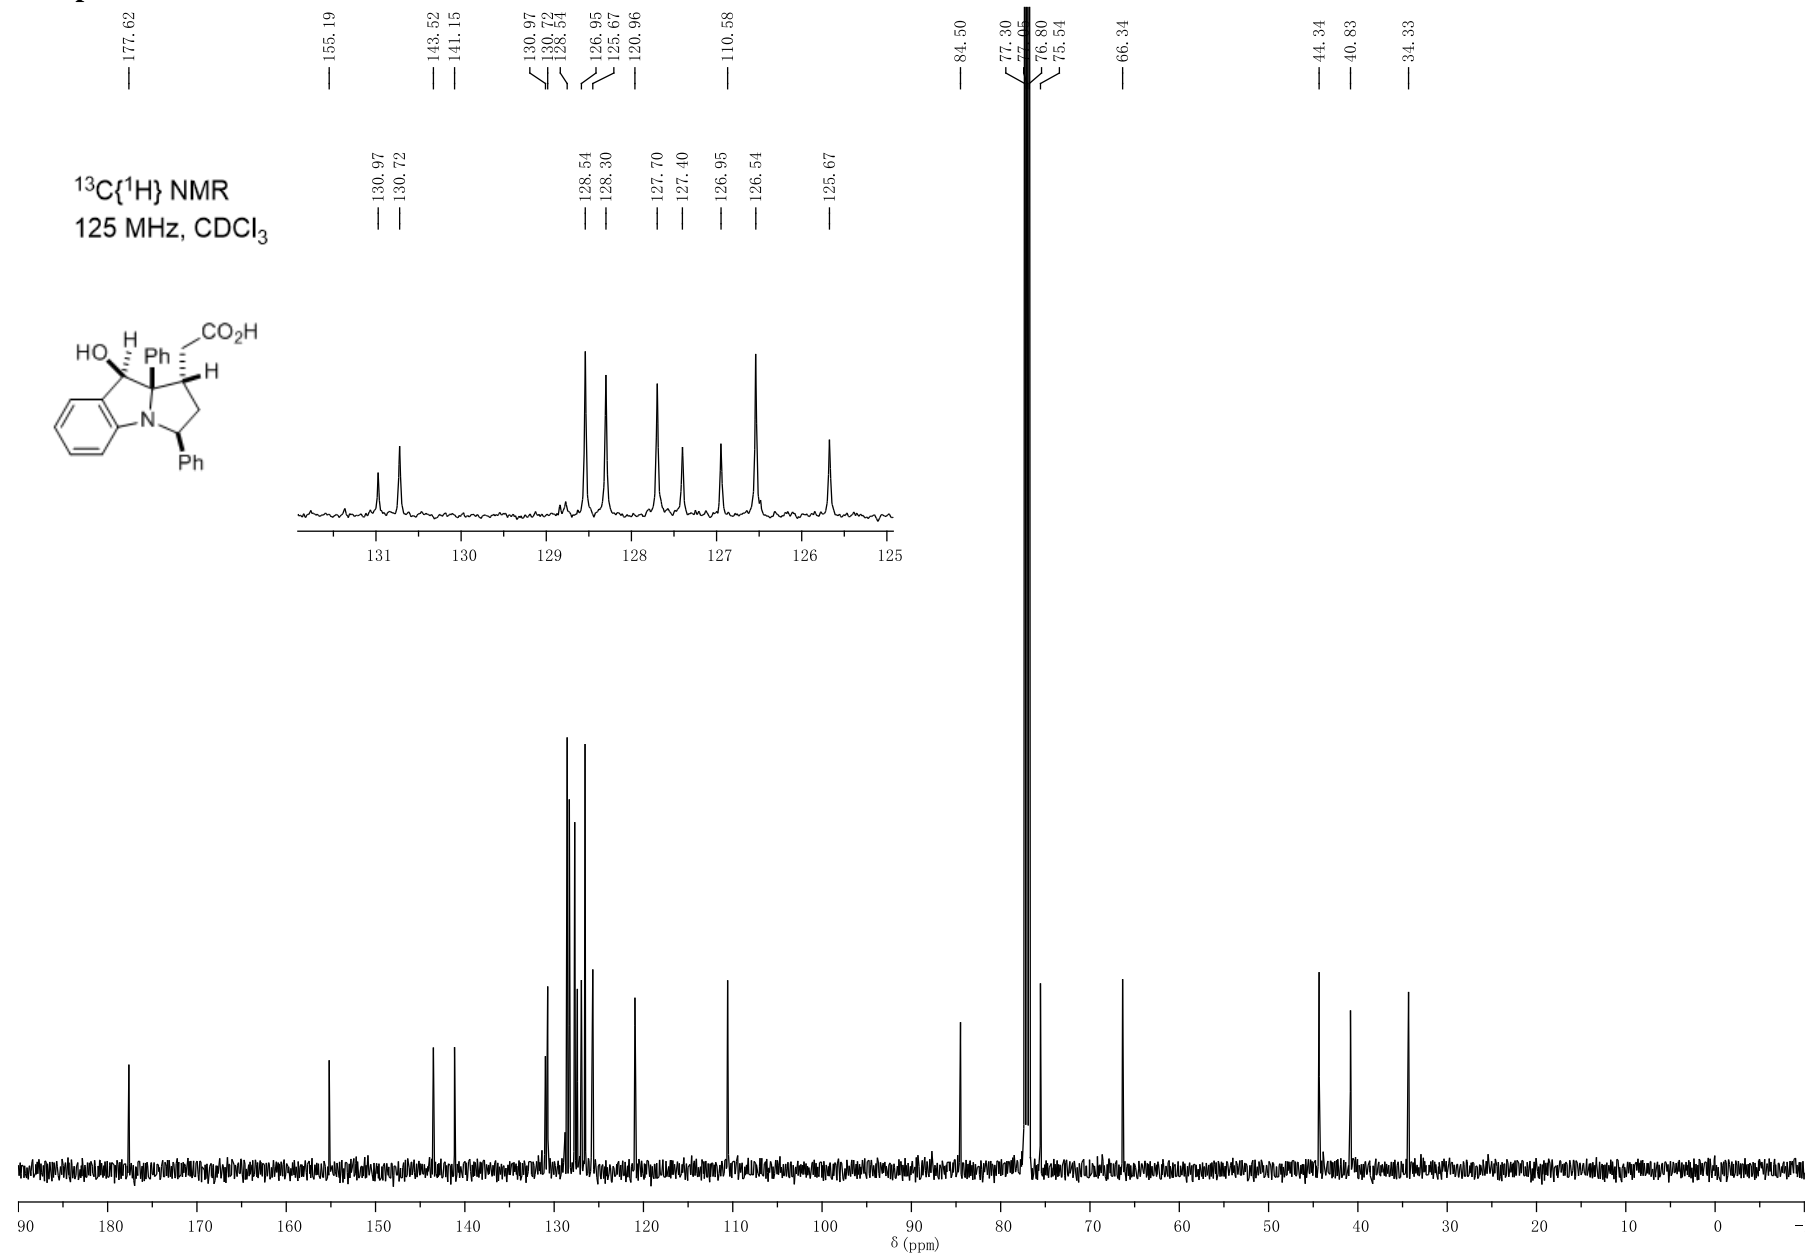

# Compound 9

7.624  
7.608  
7.396  
7.330  
7.287  
7.251  
6.943  
6.928  
6.760  
6.744

5.736

4.698  
4.684  
4.677  
4.663

3.072  
3.063  
3.053  
3.045  
3.035  
3.025  
2.497  
2.483  
2.471  
2.457  
2.219  
2.213  
2.209  
2.198  
2.187  
2.028  
2.025  
1.998  
1.577

0.003

<sup>1</sup>H NMR  
500 MHz, CDCl<sub>3</sub>

7.492  
7.477  
7.426  
7.411  
7.396  
7.347  
7.333  
7.330  
7.320  
7.306  
7.299  
7.289  
7.287  
7.284  
7.273  
7.267  
7.261  
7.251

6.957  
6.943  
6.928

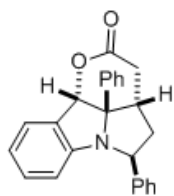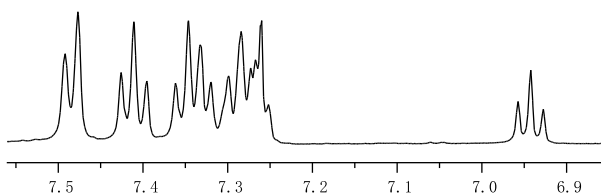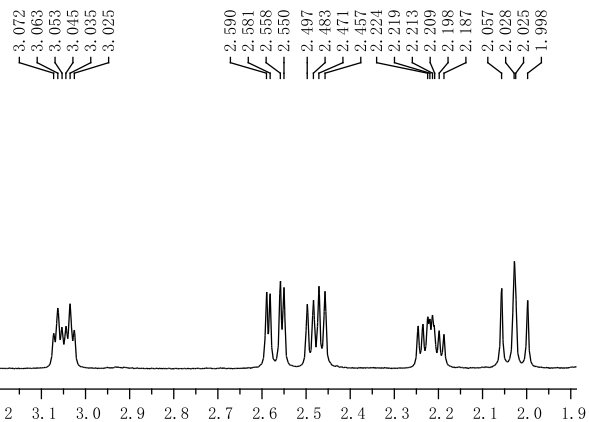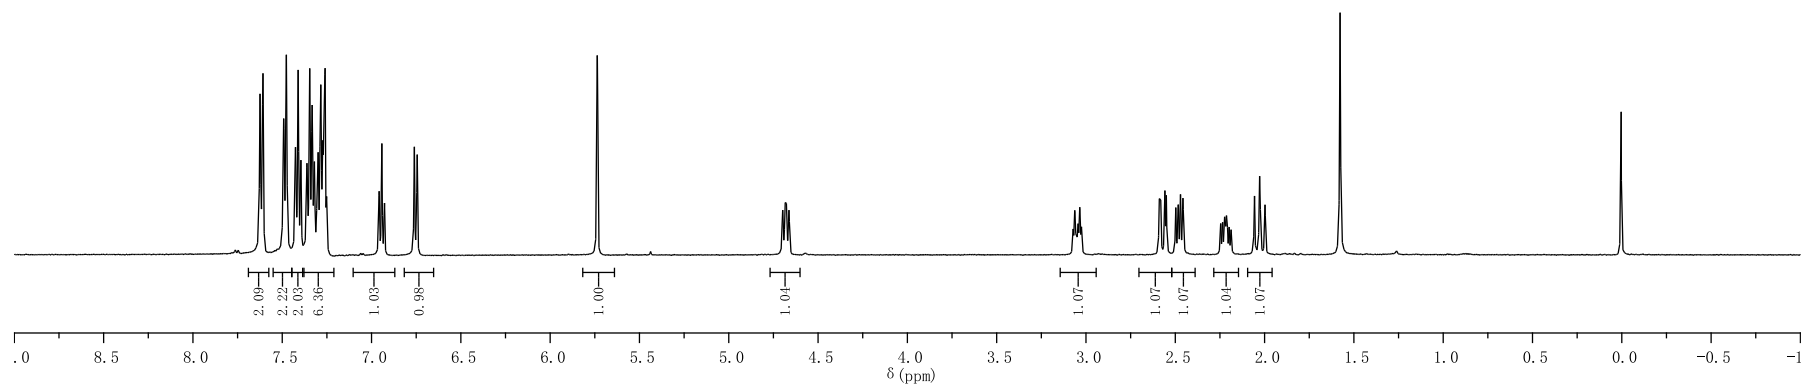

# Compound 9

$^{13}\text{C}\{^1\text{H}\}$  NMR  
125 MHz,  $\text{CDCl}_3$

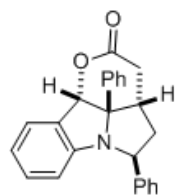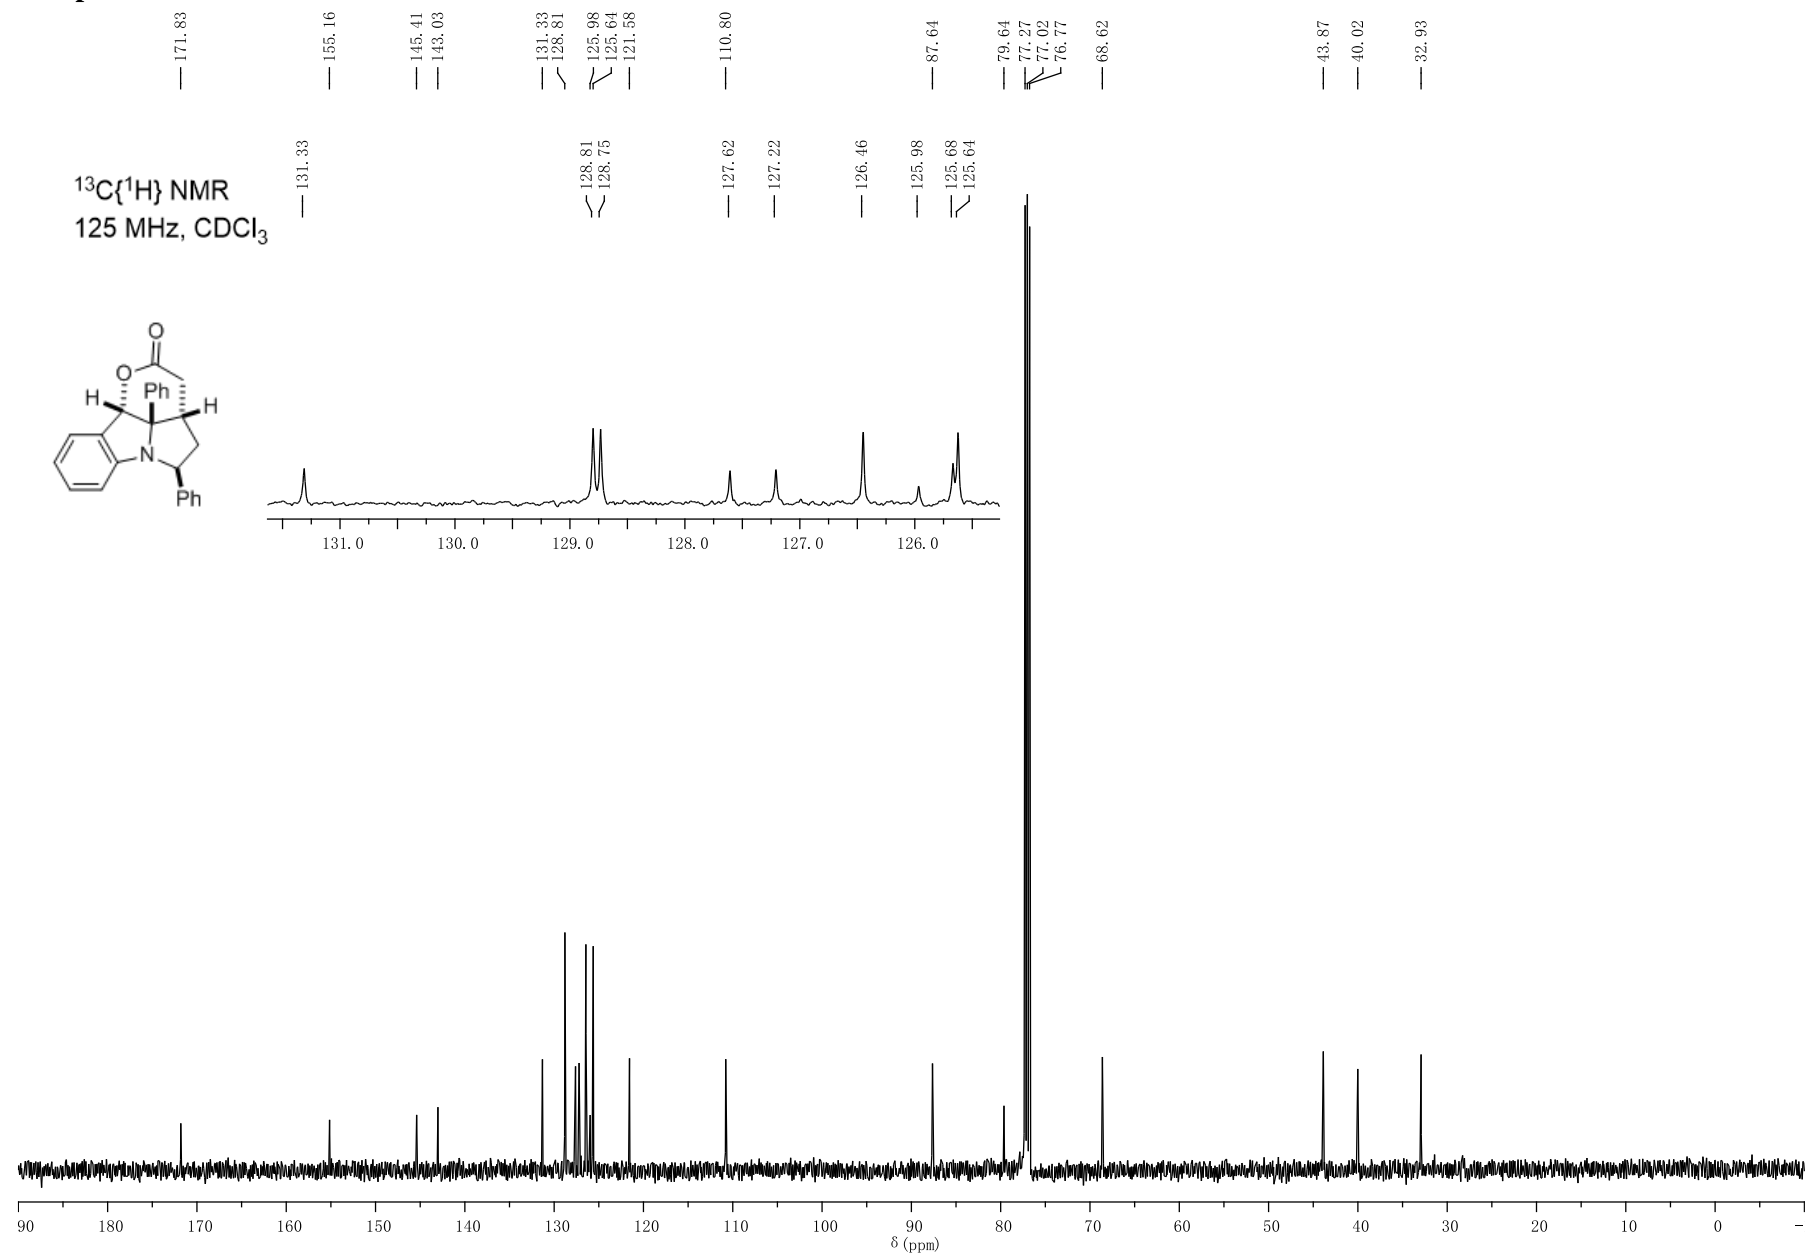

**Compound 10**

7.753  
7.738  
7.440  
7.363  
7.332  
7.233  
7.193  
7.068  
7.053

5.325  
4.515

3.310  
3.300  
3.289  
3.119  
2.969  
2.927  
2.512  
2.498  
2.484  
2.002  
1.978  
1.957  
1.725  
1.695  
1.633  
1.265  
1.176  
1.109  
1.095  
1.082  
1.066

0.010

7.753  
7.738  
7.529  
7.515  
7.440  
7.418  
7.348  
7.313  
7.260  
7.222  
7.218  
7.208  
7.193  
7.068  
7.053

<sup>1</sup>H NMR  
500 MHz, CDCl<sub>3</sub>

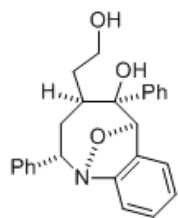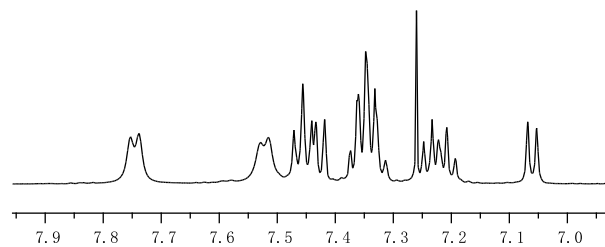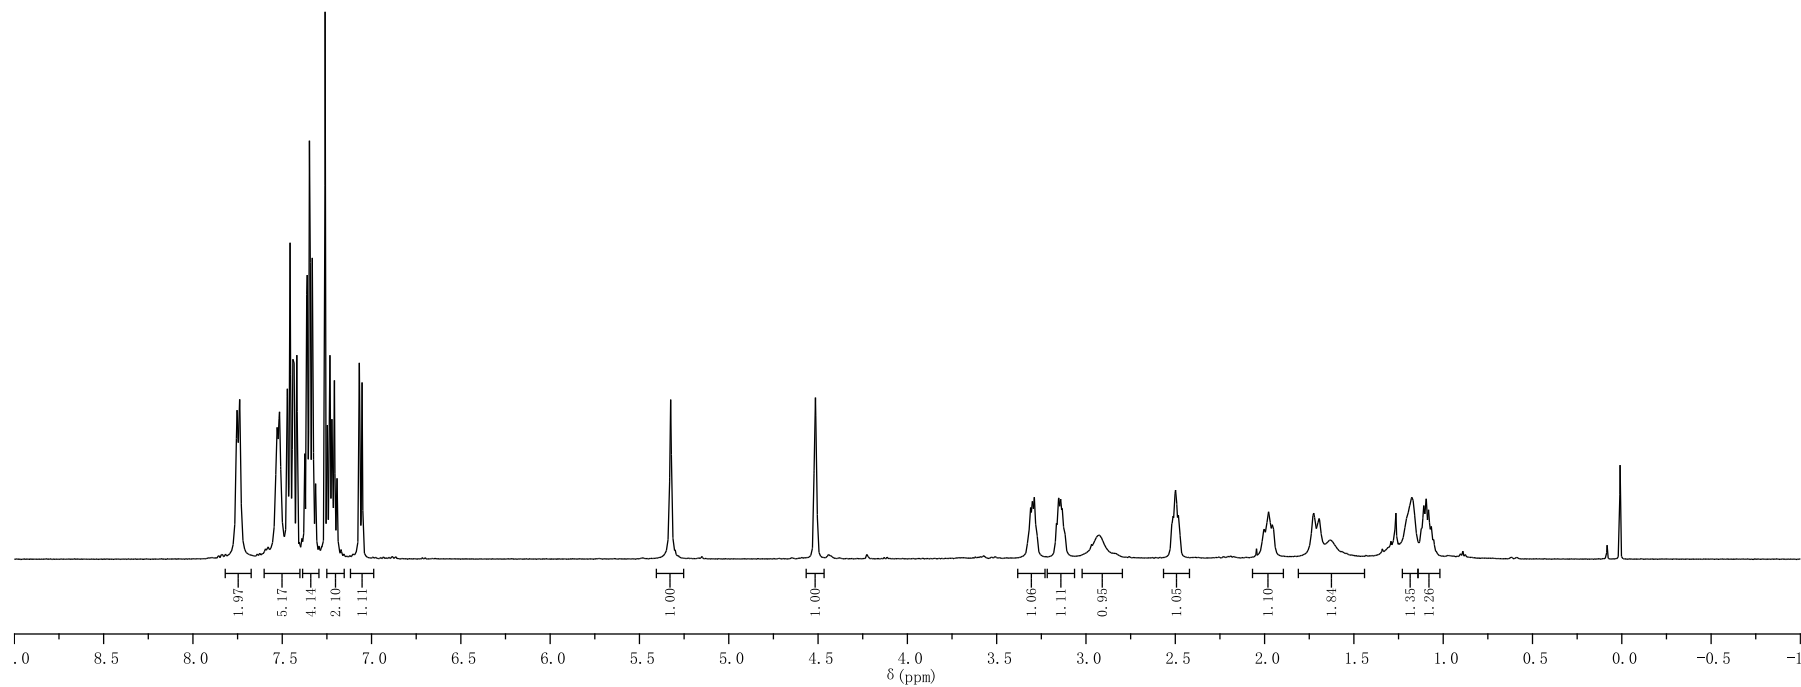



# Compound 10

$^{13}\text{C}\{^1\text{H}\}$  NMR  
125 MHz,  $\text{CDCl}_3$

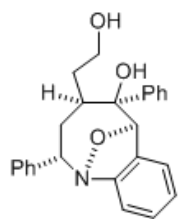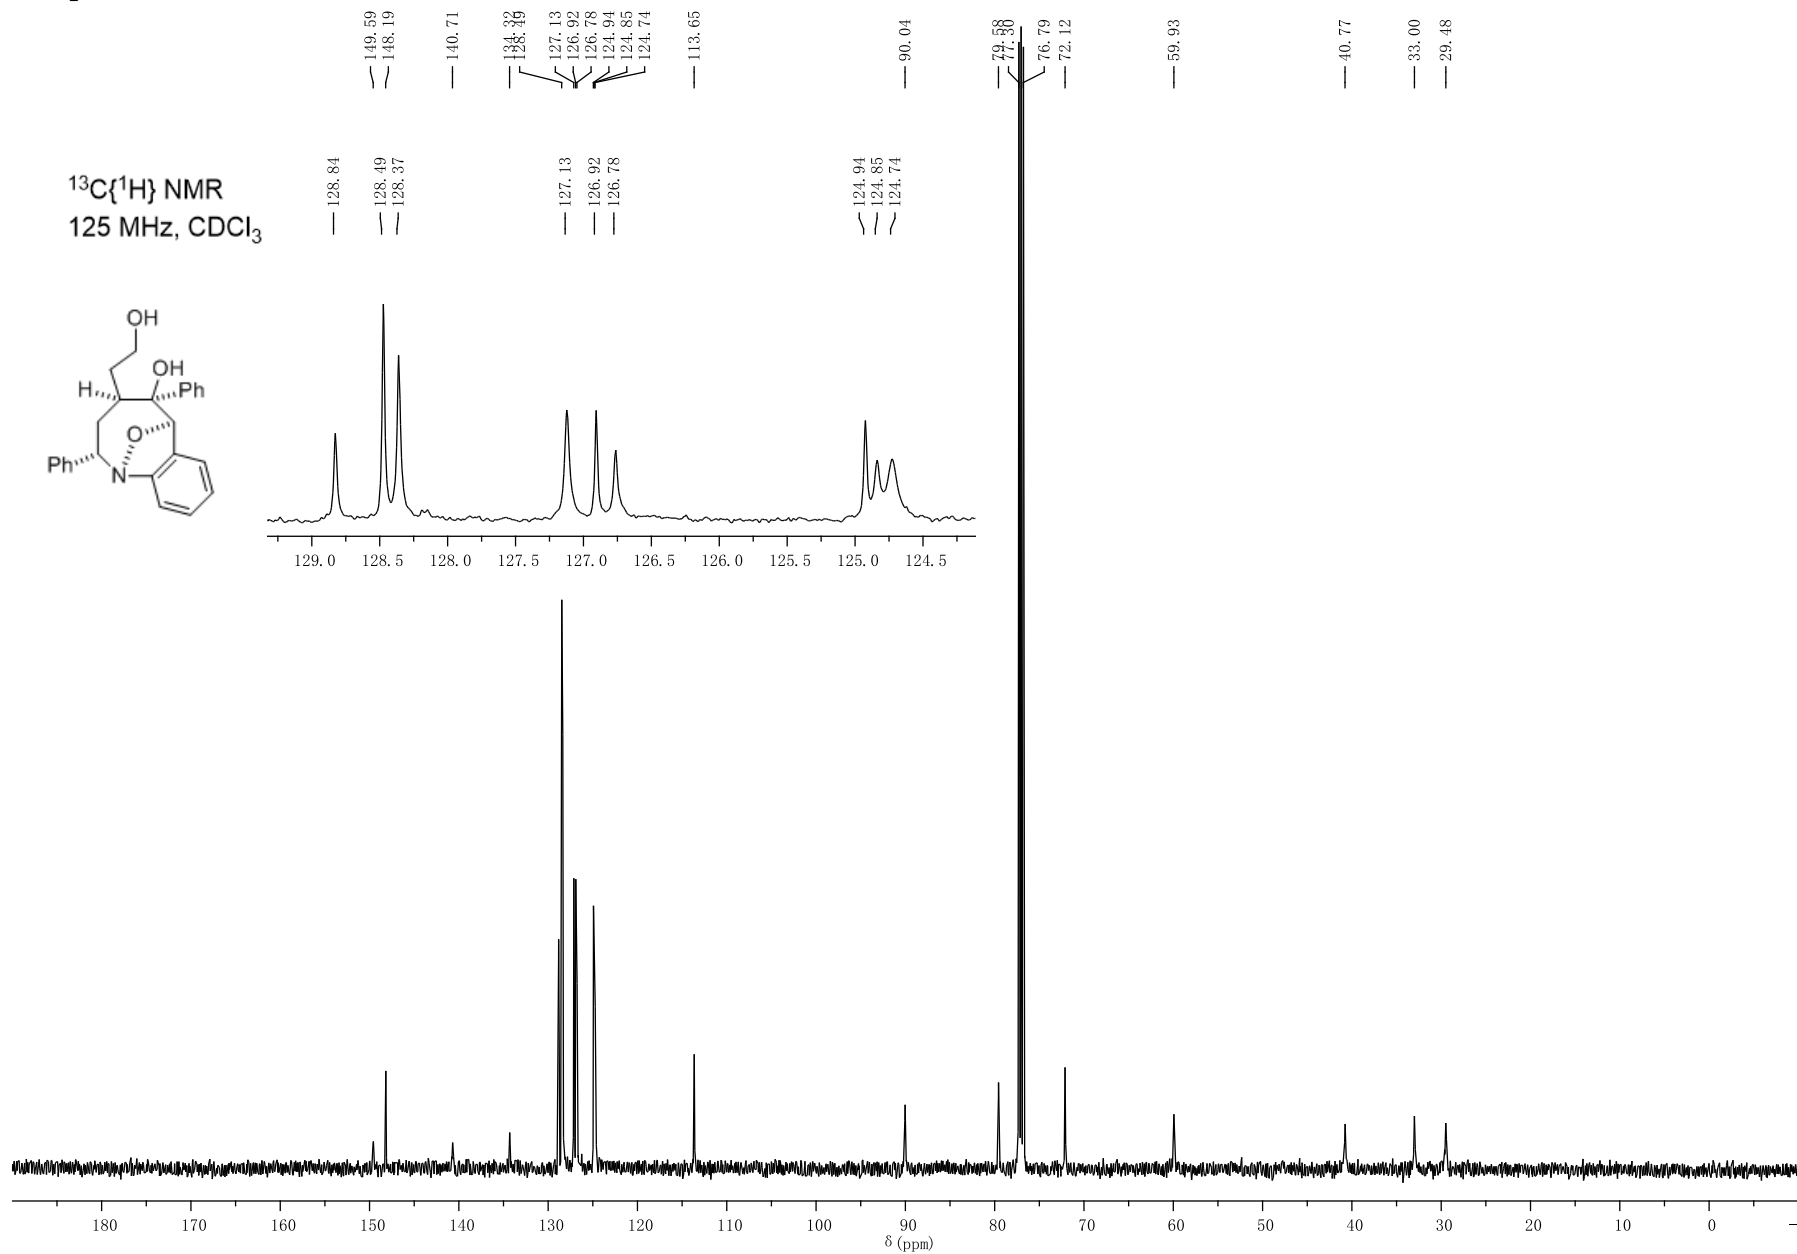

# Compound 11

7.774  
7.773  
7.760  
7.758  
7.308  
7.260  
7.207  
7.175  
7.035  
7.020

5.258

4.513  
4.505  
4.497  
4.067  
4.060  
4.042

3.895  
3.881  
3.879  
3.863  
3.847  
2.730  
2.721  
2.715  
2.711  
2.707  
2.701  
2.698  
2.692  
2.687  
2.079  
2.064  
2.056

1.793  
1.732  
1.566  
1.200  
1.194  
1.187  
1.181  
1.175  
1.169  
1.163  
1.156  
1.149

0.004

7.513  
7.510  
7.506  
7.496  
7.489  
7.478  
7.474  
7.463  
7.450  
7.446  
7.323  
7.319  
7.308  
7.306  
7.295  
7.288  
7.260

7.232  
7.230  
7.221  
7.217  
7.214  
7.207  
7.205  
7.203  
7.200  
7.192  
7.190  
7.177  
7.175

4.513  
4.505  
4.497

4.083  
4.076  
4.067  
4.065  
4.060  
4.049  
4.042

3.895  
3.881  
3.879  
3.863  
3.847

<sup>1</sup>H NMR  
500 MHz, CDCl<sub>3</sub>

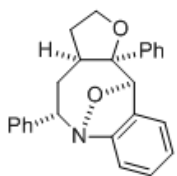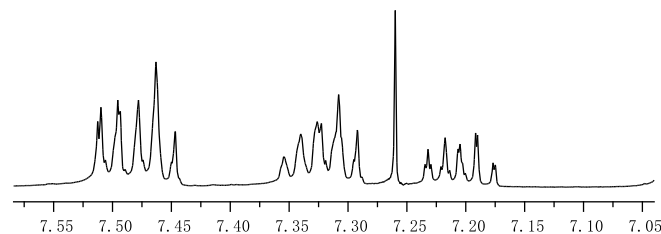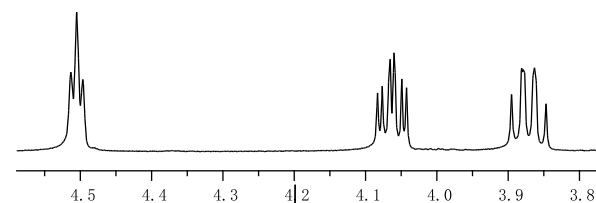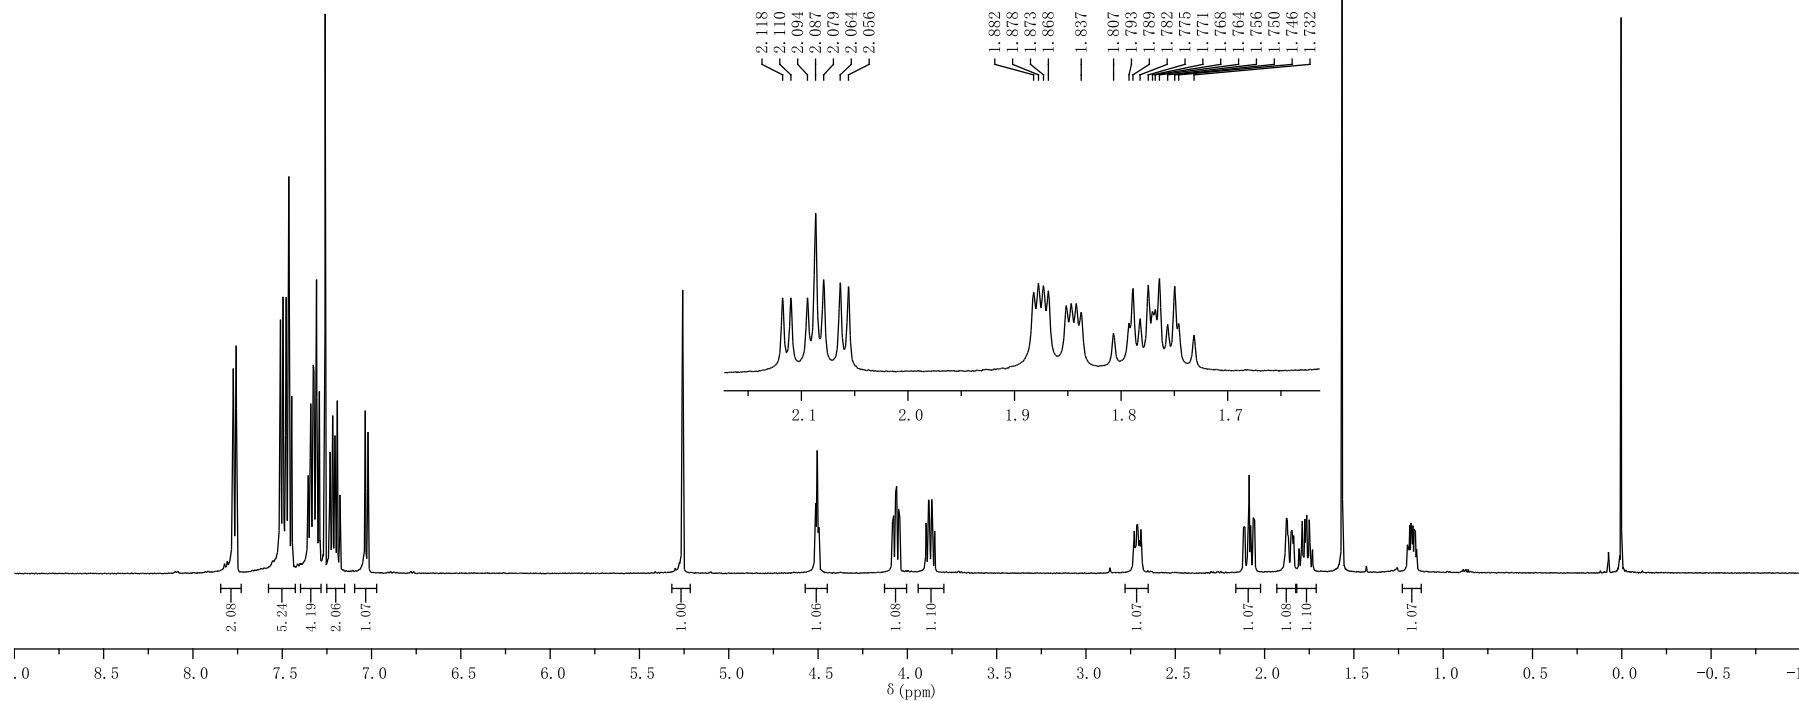

# Compound 11

$^{13}\text{C}\{^1\text{H}\}$  NMR  
125 MHz,  $\text{CDCl}_3$

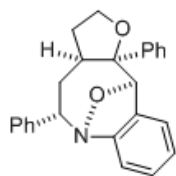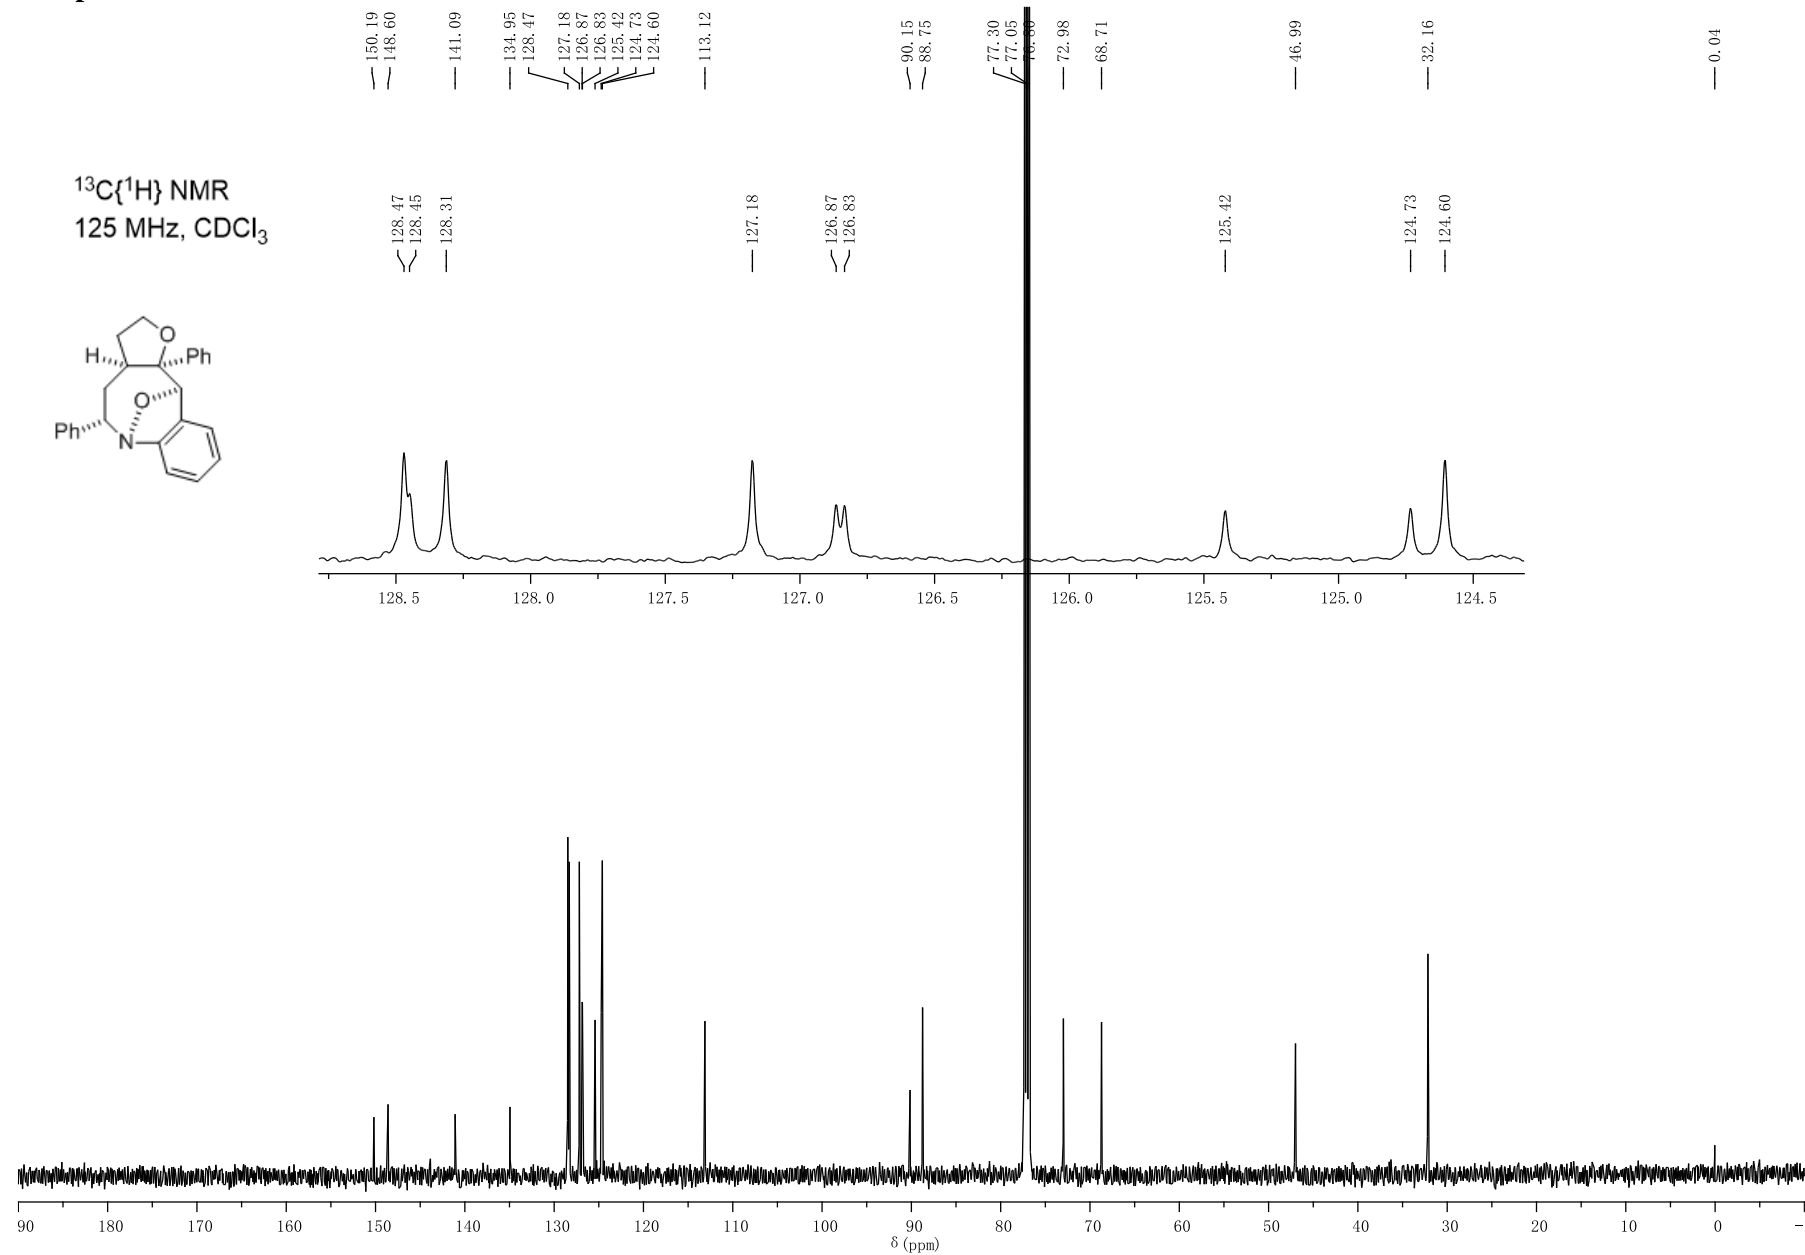

# Compound 11

2D COSY NMR  
500 MHz, CDCl<sub>3</sub>

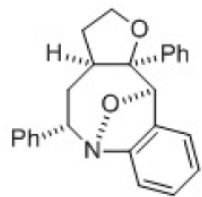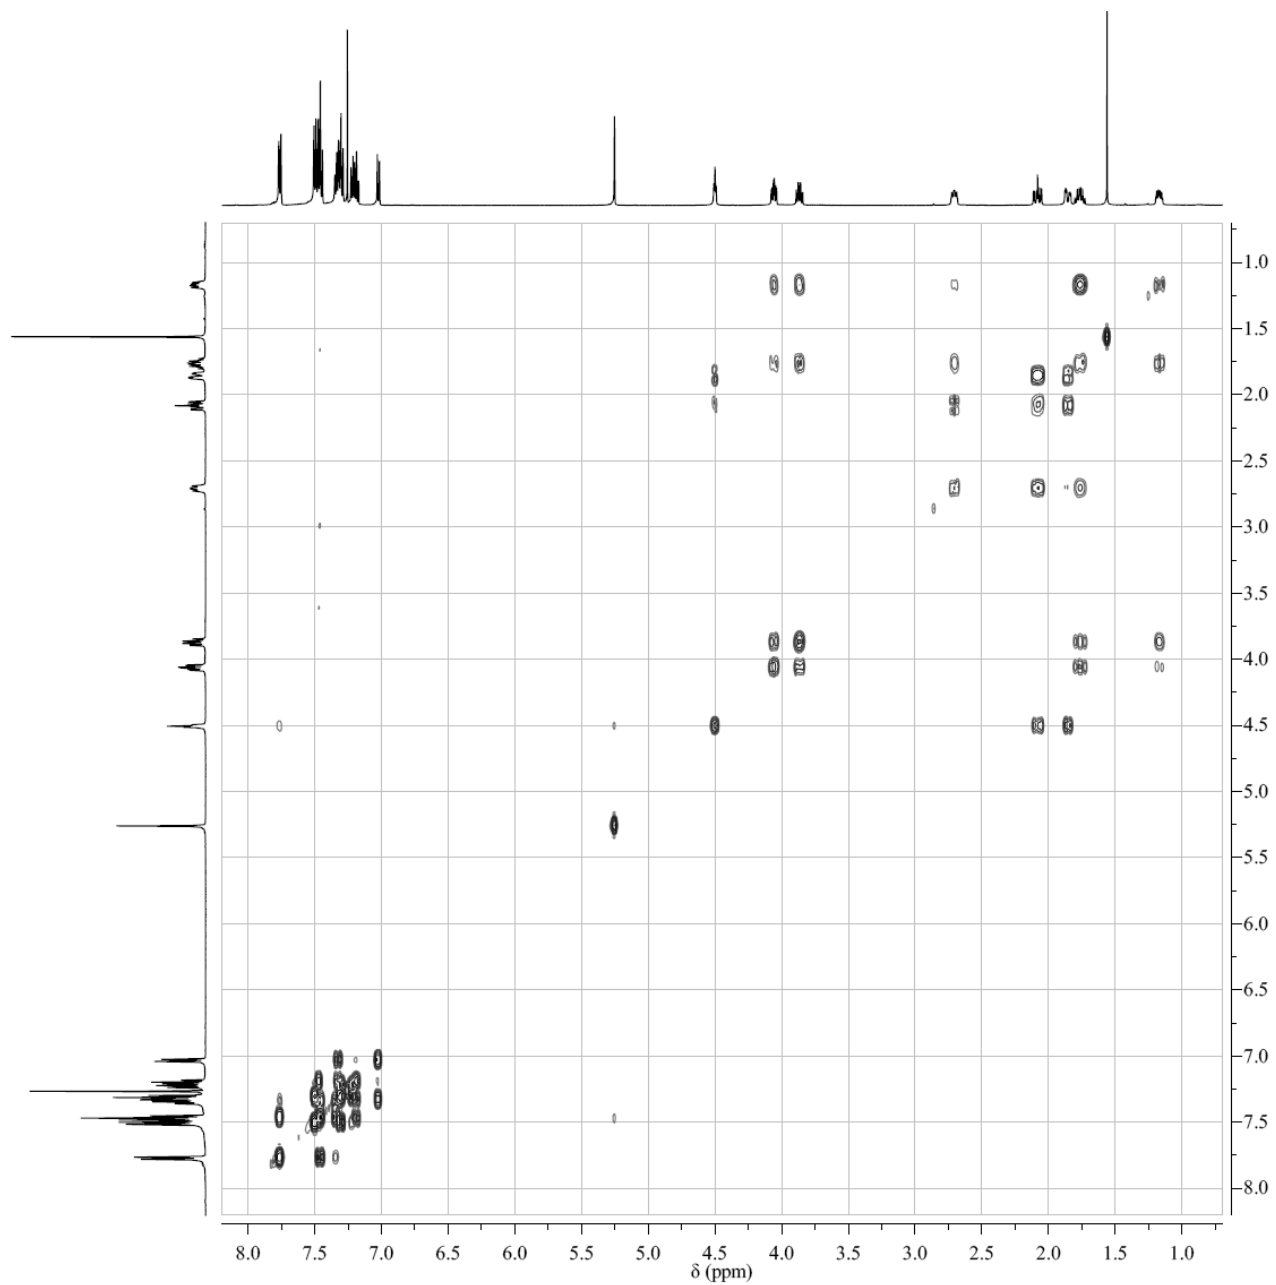



Compound 12 (-50 °C)

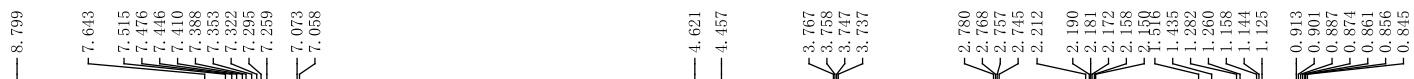

<sup>1</sup>H NMR  
500 MHz, CDCl<sub>3</sub>

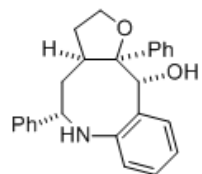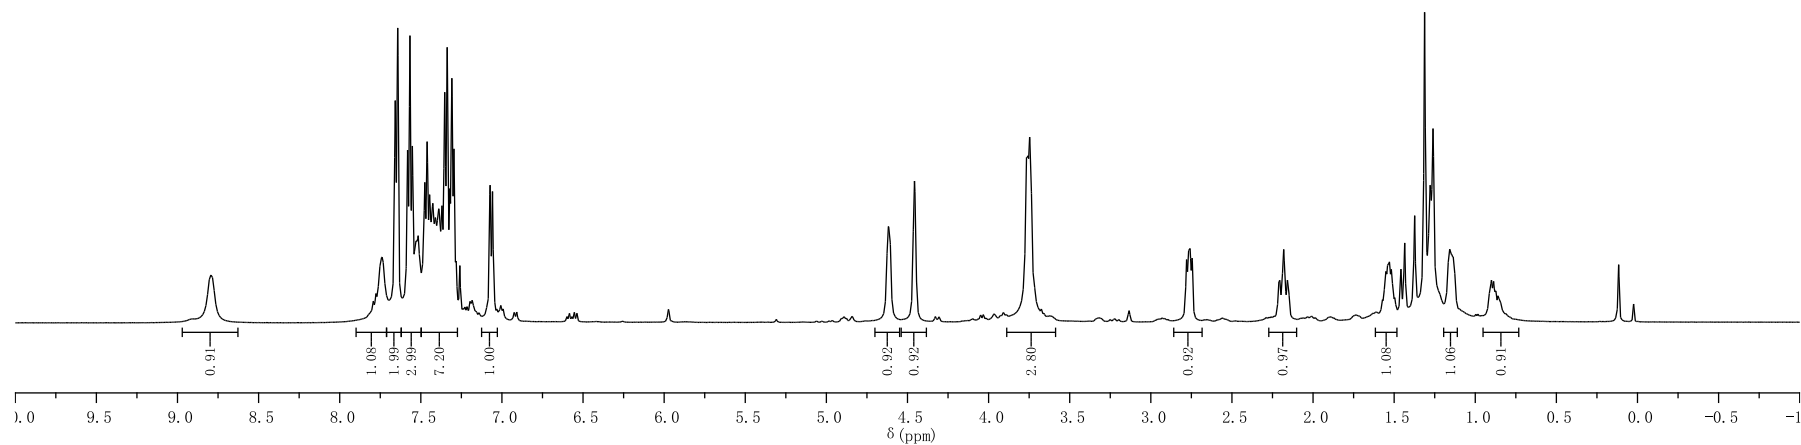

Compound 12 (-50 °C)

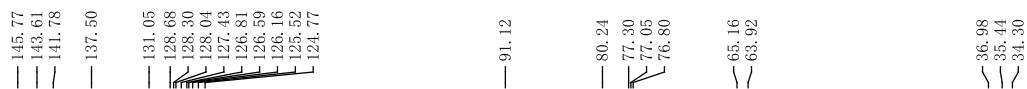

$^{13}\text{C}\{^1\text{H}\}$  NMR  
125 MHz,  $\text{CDCl}_3$

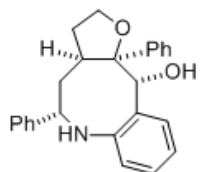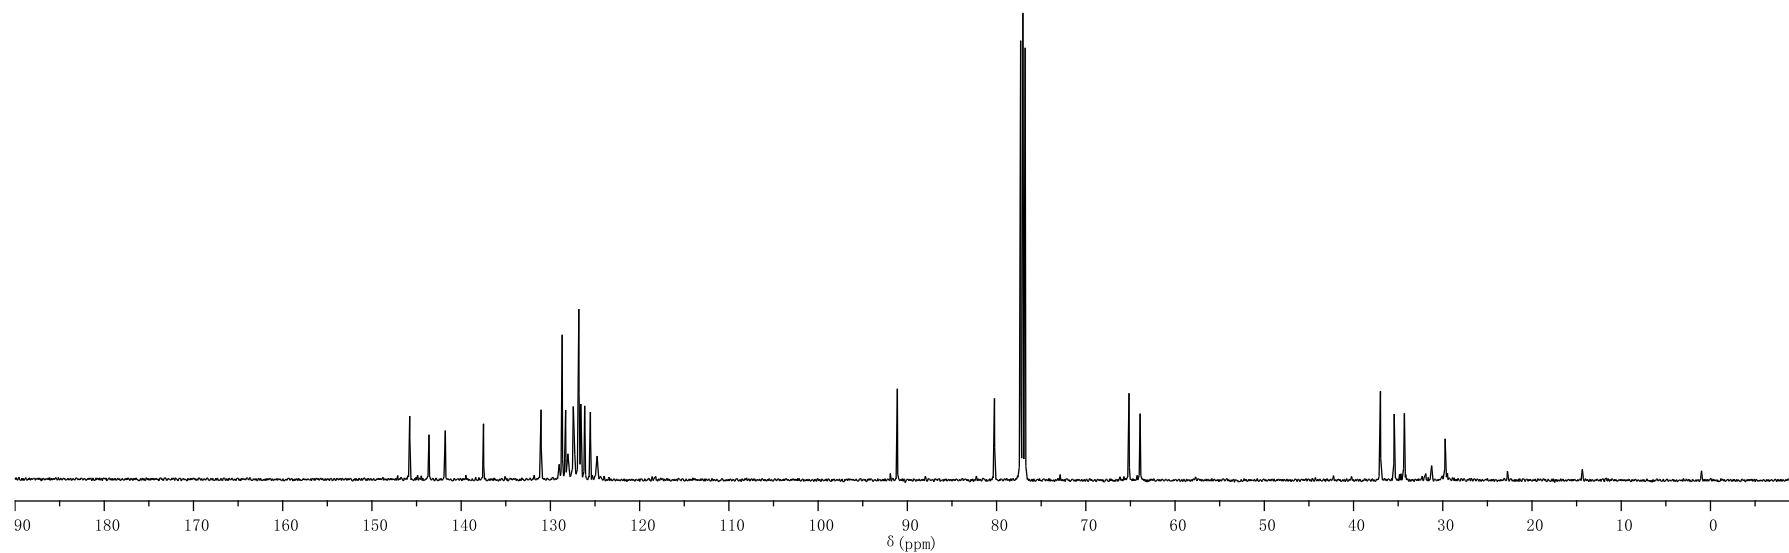

# Compound 13

7.4110  
7.4021  
7.3470  
7.3386  
7.3299  
7.3202  
7.3126  
7.2582  
7.2158  
7.2016  
7.1881  
7.1826  
7.1669  
7.1546  
7.0892  
7.0758  
7.0195  
7.0046  
6.9903  
6.5506  
6.5363

5.0691

4.0324  
4.0165  
4.0005  
3.9846  
3.9379  
3.7861  
3.7792  
3.7691  
3.7612

3.1740

2.5867  
2.5749  
2.5673  
2.5570  
2.5455  
2.5344

2.1394  
2.0302

1.8406  
1.7524

1.5840

0.0011

<sup>1</sup>H NMR  
500 MHz, CDCl<sub>3</sub>

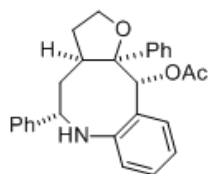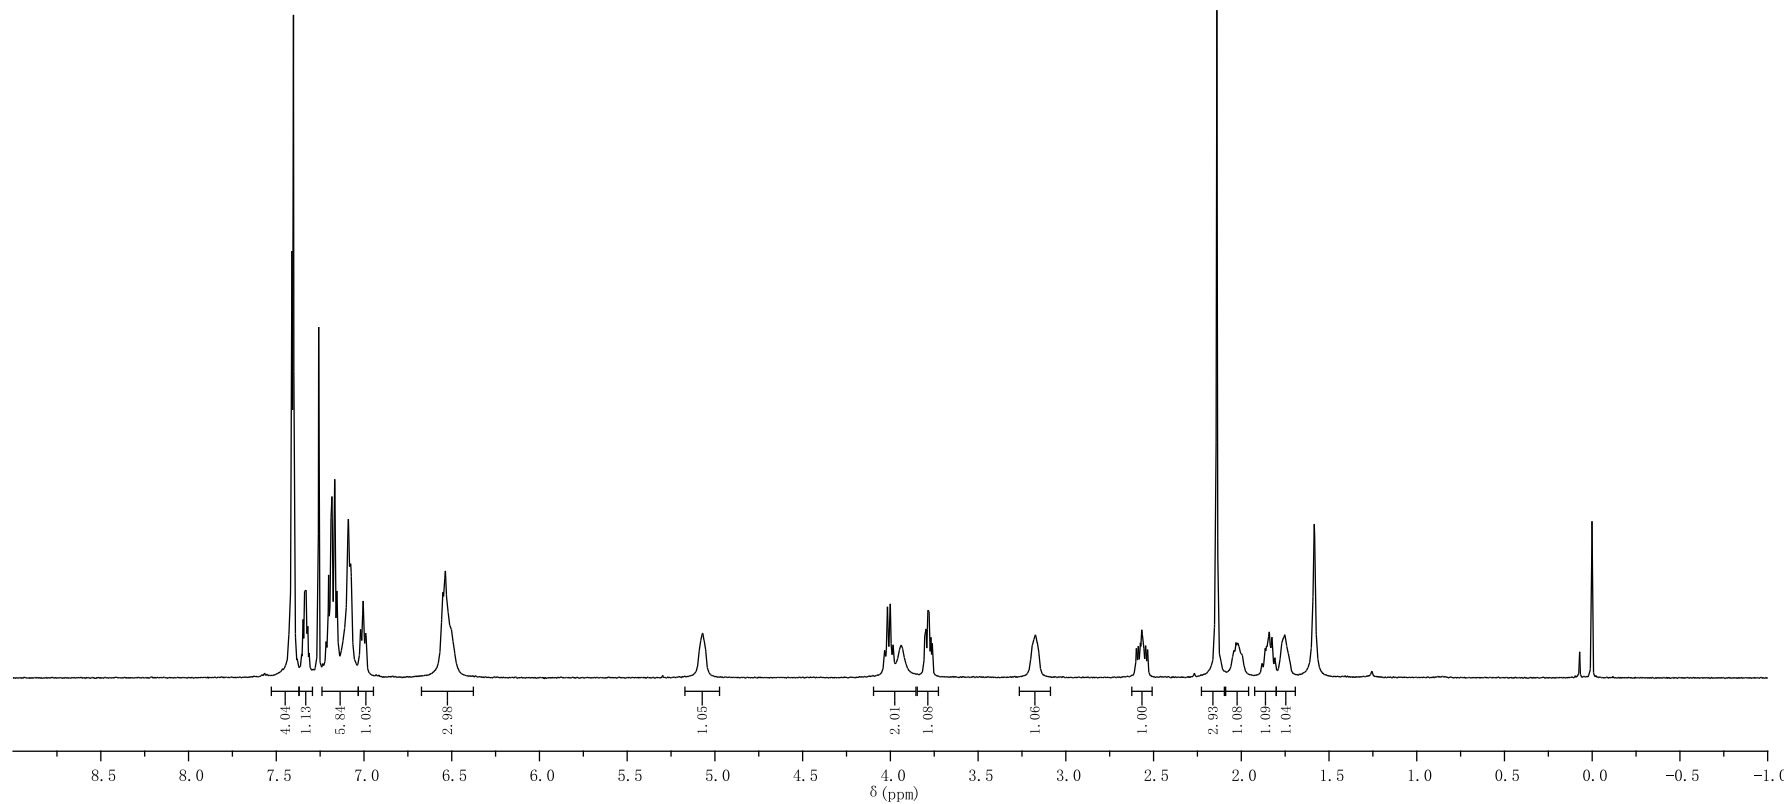



# Compound 13

$^{13}\text{C}\{^1\text{H}\}$  NMR  
125 MHz,  $\text{CDCl}_3$

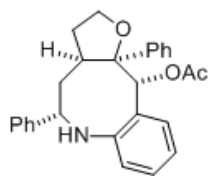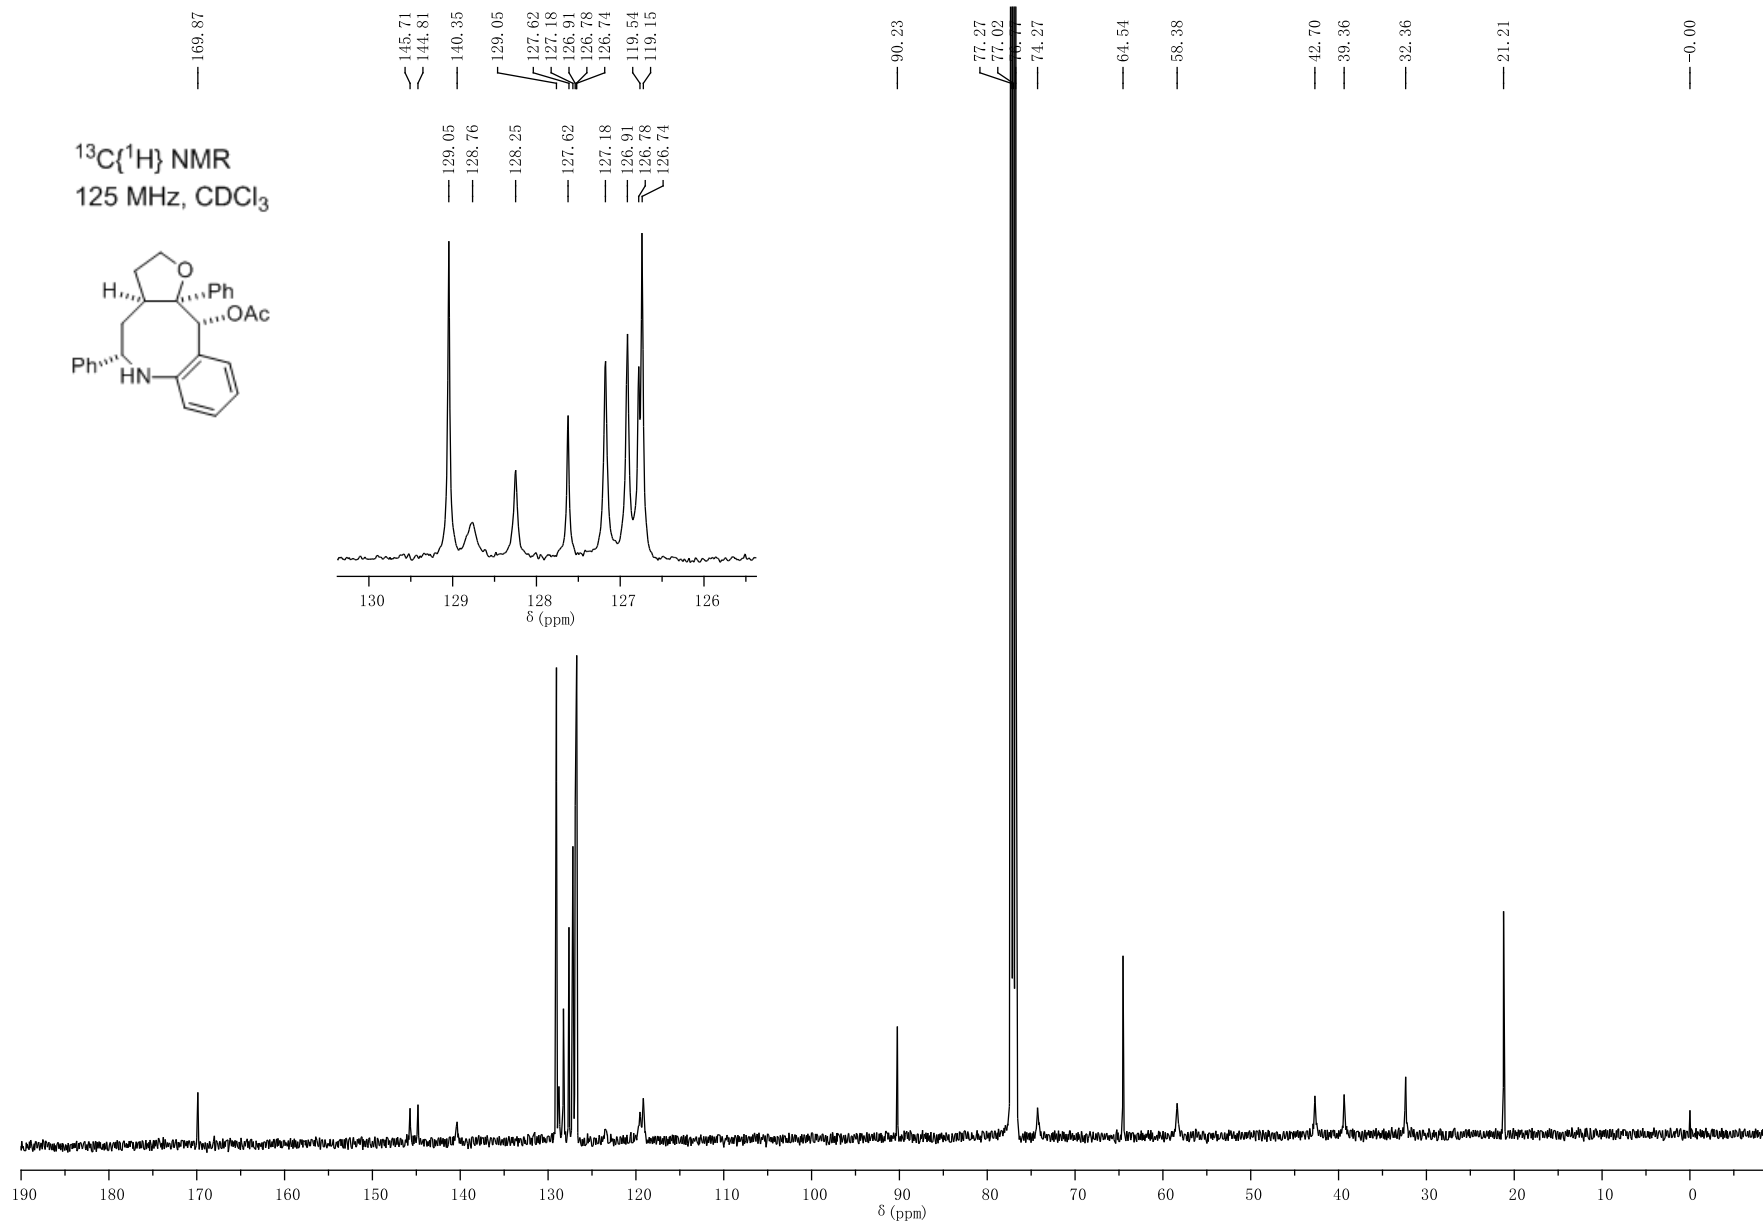

# Compound 13

2D COSY NMR  
500 MHz, CDCl<sub>3</sub>

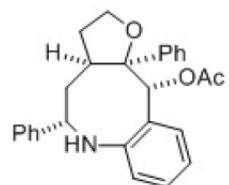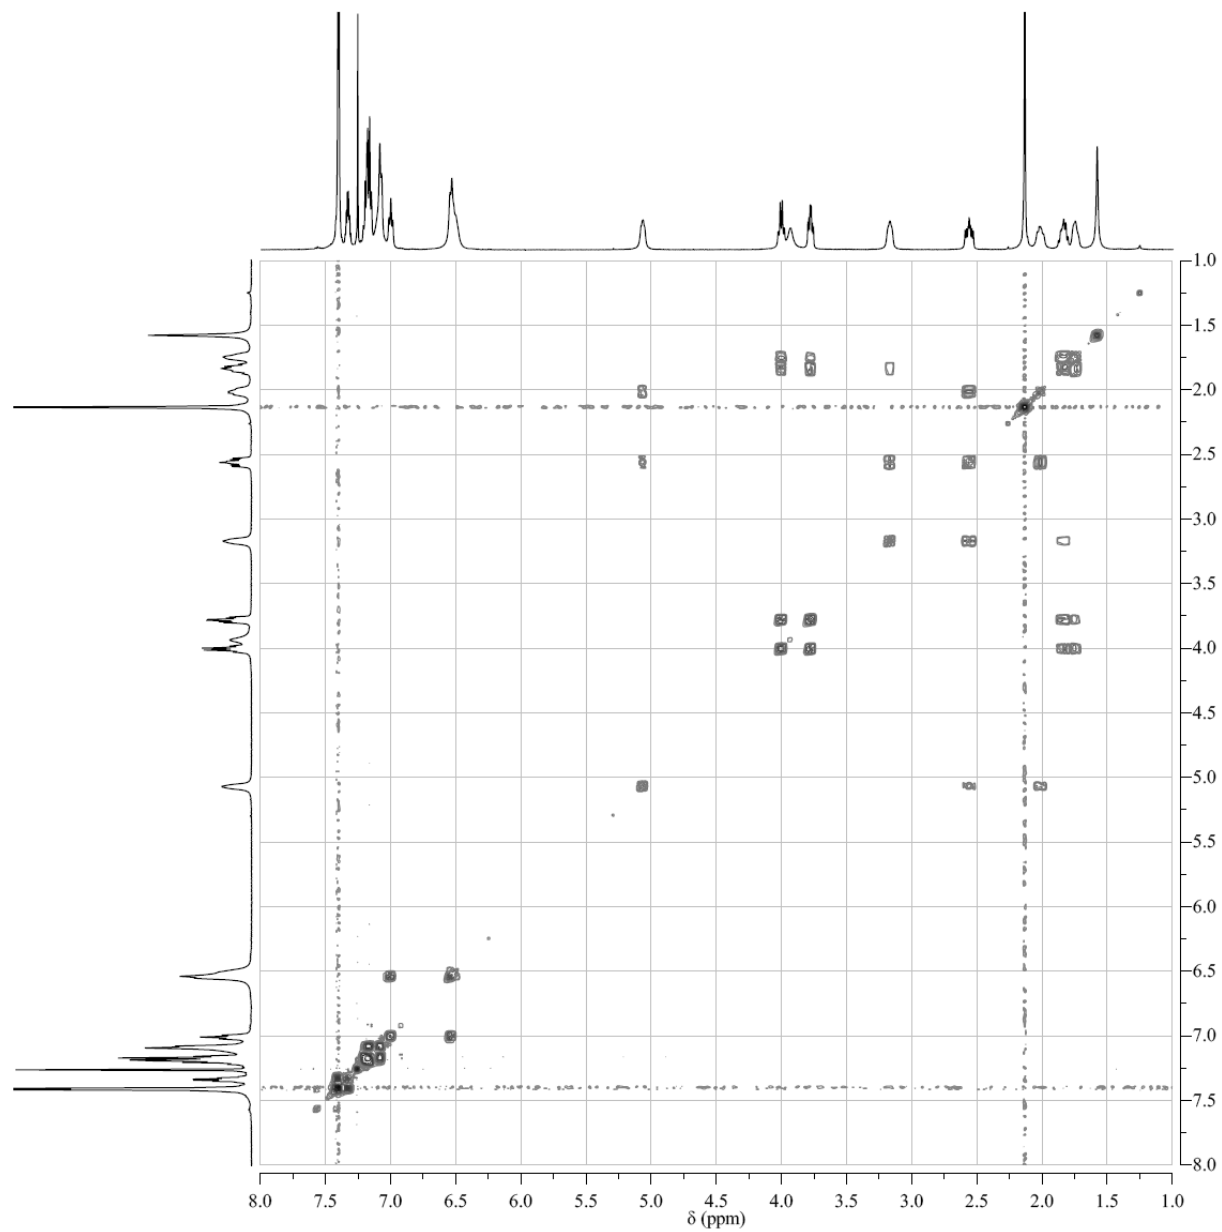

# Compound 13

2D HSQC NMR  
500 MHz, CDCl<sub>3</sub>

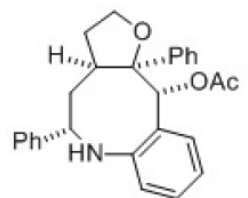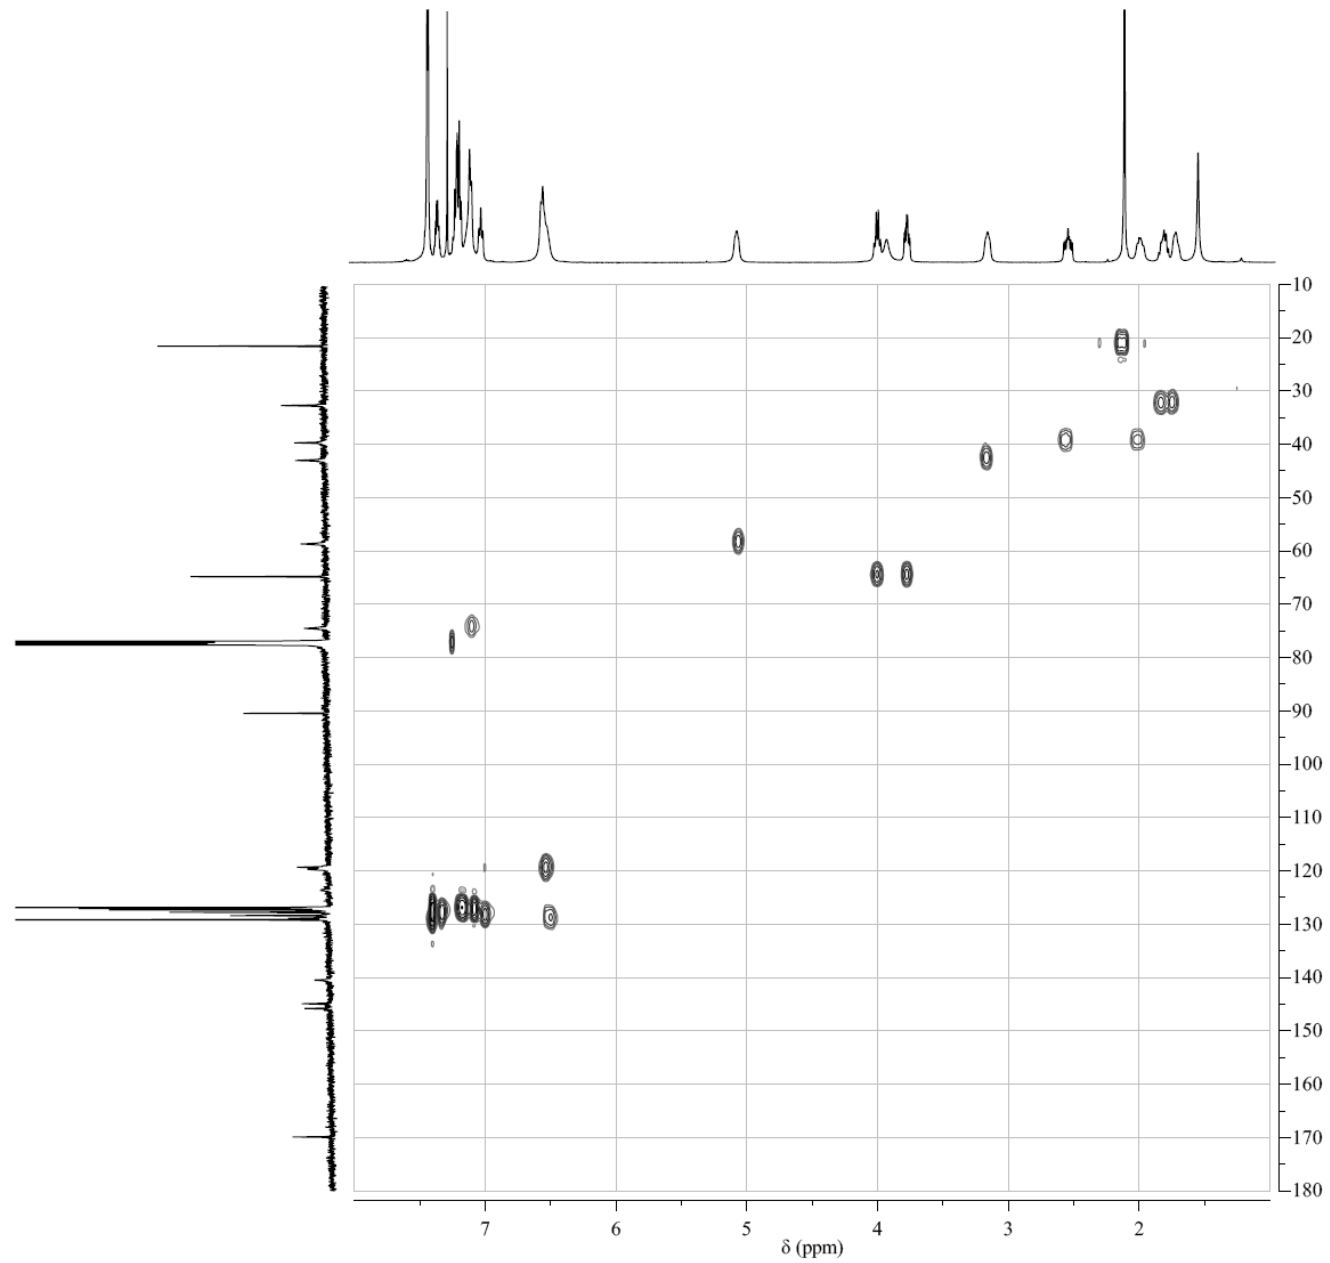

## 7. Studies on the conversion of compound 8 to compound 9

**Figure S2**  $^1\text{H}$  NMR Studies on the conversion of compound 8 to compound 9

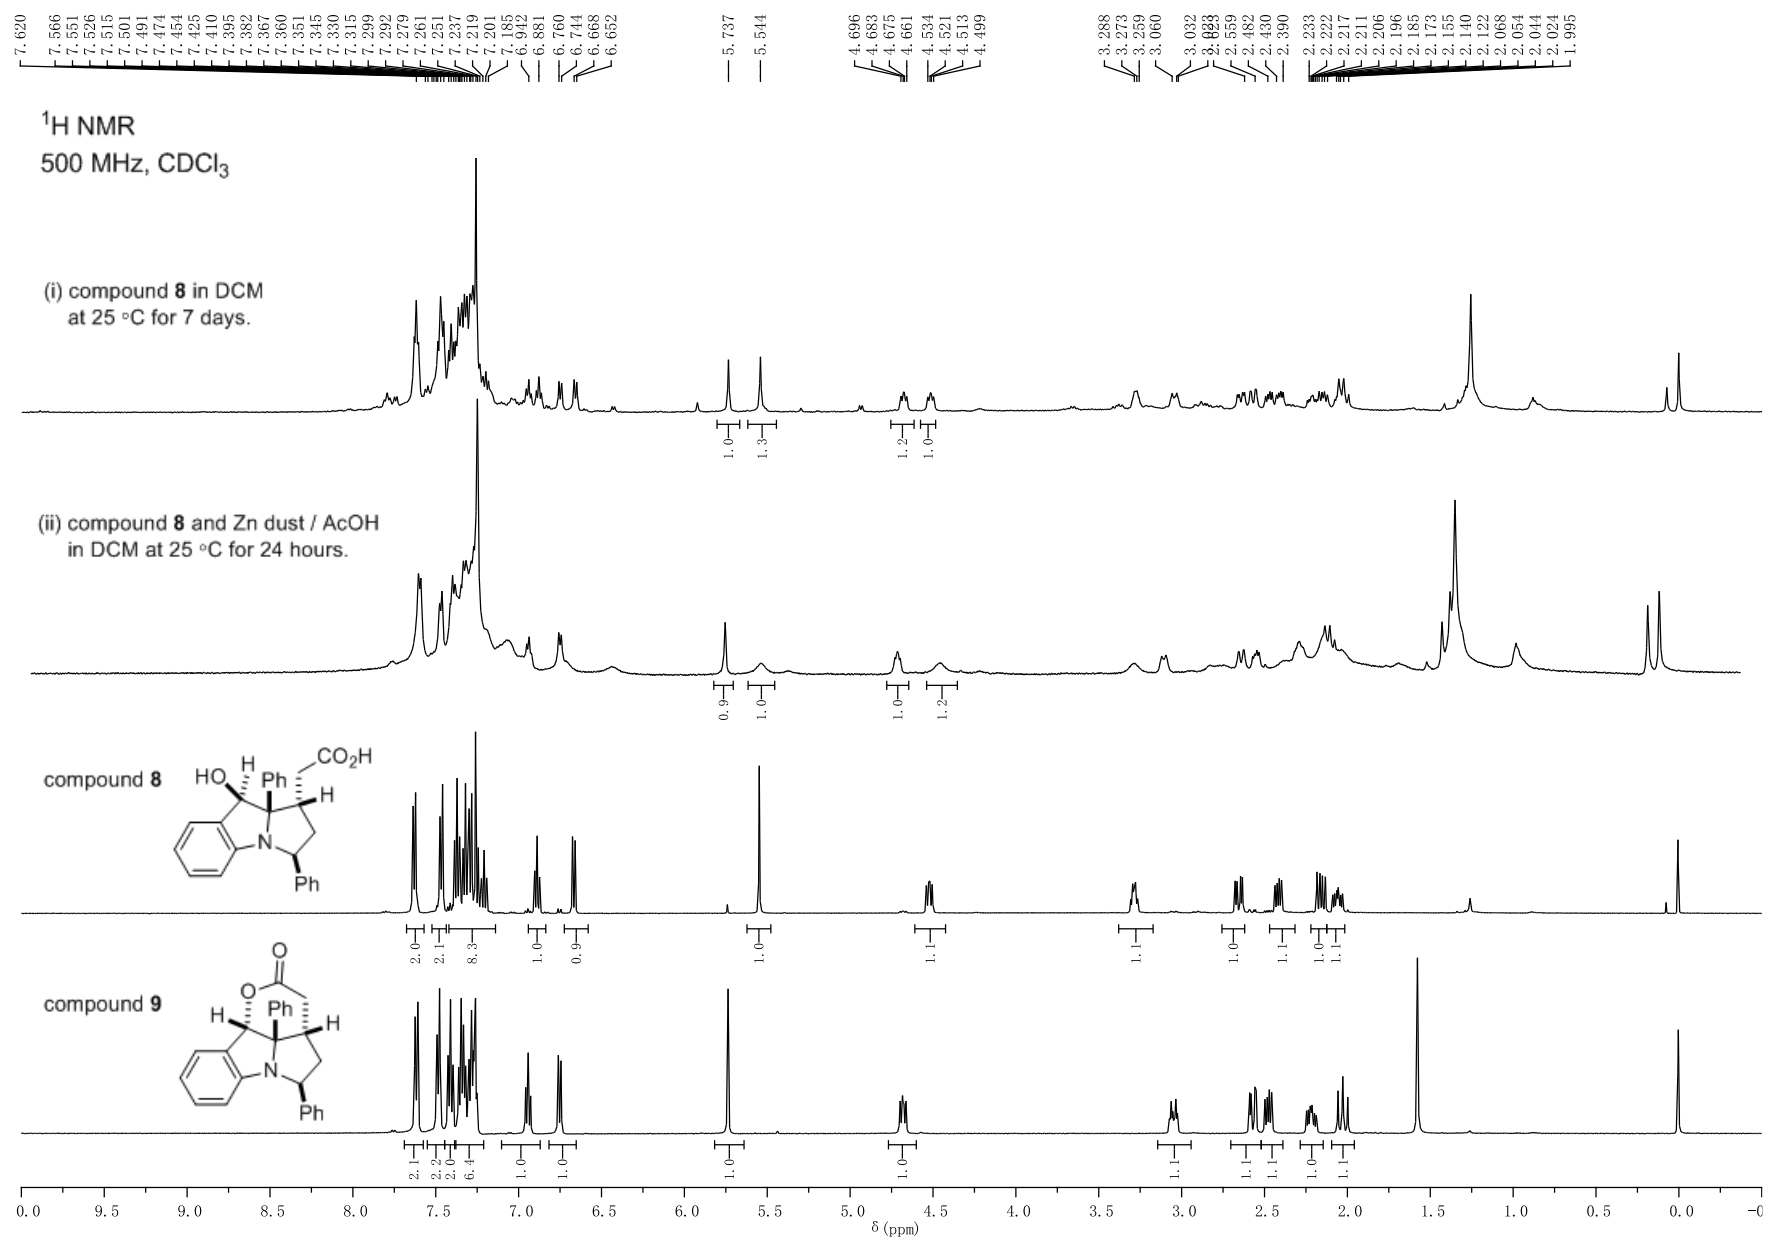

## 8. Determination of the structure of 3ua' by transesterification and by comparison of HPLC

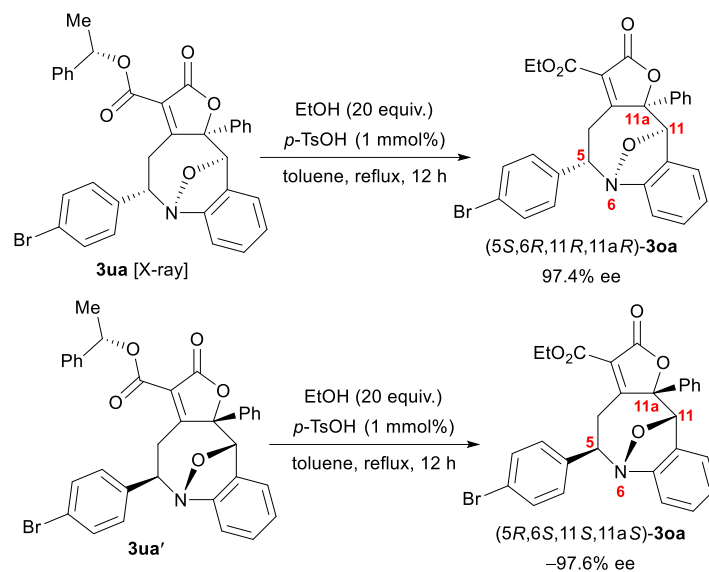

HPLC (Daicel CHIRALPAK IA column, isopropanol/*n*-hexane = 30/70, flow rate = 1.0 mL/min,  $\lambda = 254$  nm)

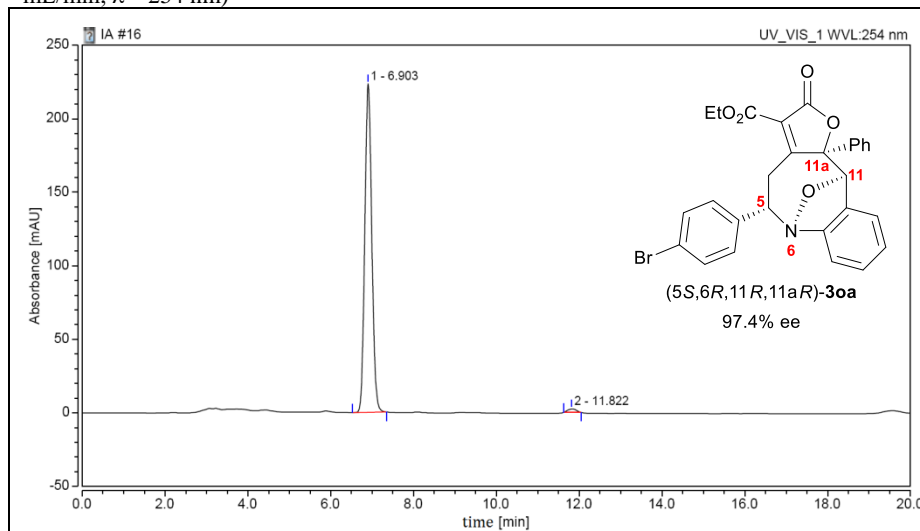

Area Percent Report

| Peak | RetTime | Area [mAU] | Height  | Area% |
|------|---------|------------|---------|-------|
| 1    | 6.903   | 43.635     | 223.469 | 98.71 |
| 2    | 11.822  | 0.572      | 2.437   | 1.29  |

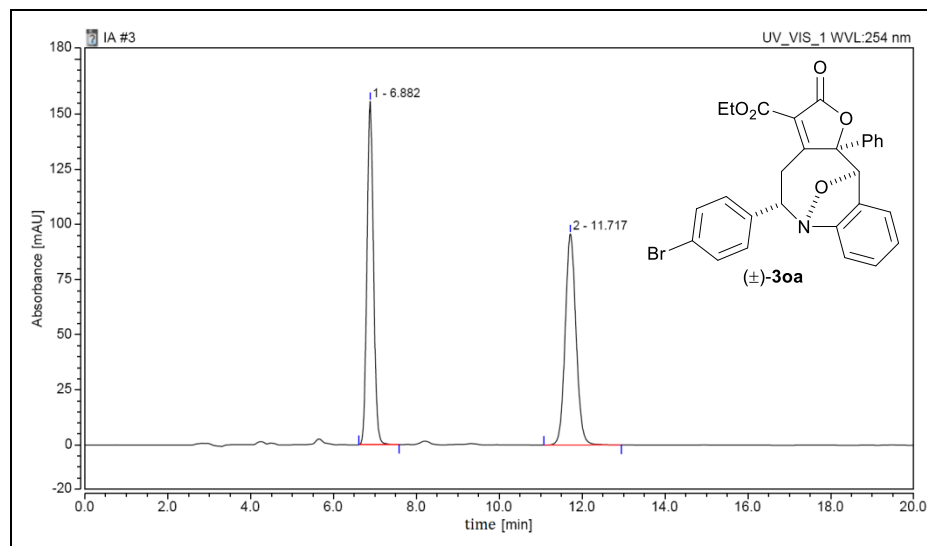

Area Percent Report

| Peak | RetTime | Area [mAU] | Height  | Area% |
|------|---------|------------|---------|-------|
| 1    | 6.882   | 28.336     | 155.757 | 49.39 |
| 2    | 11.717  | 29.033     | 95.728  | 50.61 |

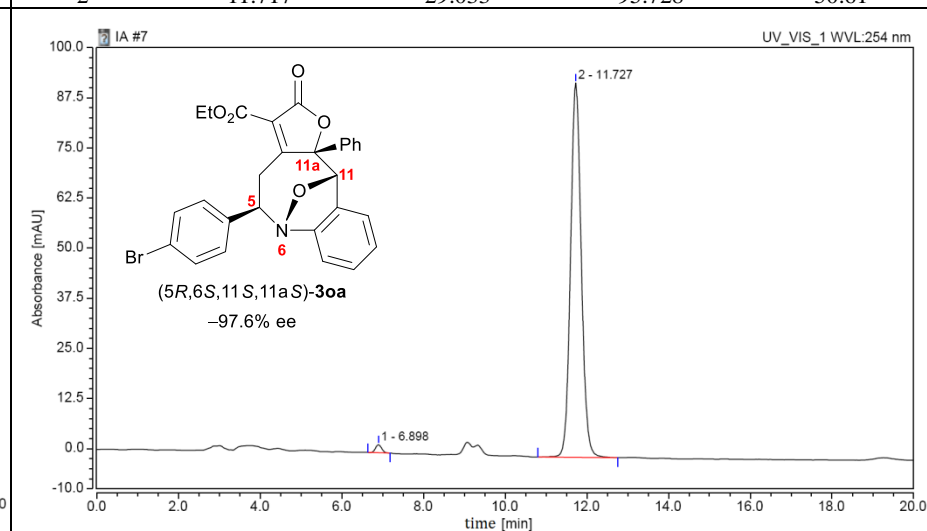

Area Percent Report

| Peak | RetTime | Area [mAU] | Height | Area% |
|------|---------|------------|--------|-------|
| 1    | 6.898   | 0.350      | 2.030  | 1.21  |
| 2    | 11.727  | 28.440     | 93.436 | 98.79 |
